# Supplementary material for: Long-Term Mild Heat Causes Post-Mitotic Pollen Abortion Through a Local Effect on Flowers
Source: Front Plant Sci. 2022 Jul 11;13:925754. doi: 10.3389/fpls.2022.925754 (PMC9310381; doi:10.3389/fpls.2022.925754)
Supplement: Supplementary file 1 [file Table_1.XLSX]

## Sheet: Table S3A
Table S3A. GO terms used to extract pollen, tapetum and anther-related genes of Arabidopsis from the TAIR10 annotation
GO id	GO name
GO:0009555	pollen development
GO:0009556	microsporogenesis
GO:0009846	pollen germination
GO:0009901	anther dehiscence
GO:0010152	pollen maturation
GO:0010208	pollen wall assembly
GO:0010234	anther wall tapetum cell fate specification
GO:0010480	microsporocyte differentiation
GO:0010584	pollen exine formation
GO:0022619	generative cell differentiation
GO:0022620	vegetative cell differentiation
GO:0043667	pollen wall
GO:0043668	exine
GO:0043678	intine
GO:0048235	pollen sperm cell differentiation
GO:0048555	generative cell nucleus
GO:0048556	microsporocyte nucleus
GO:0048653	anther development
GO:0048654	anther morphogenesis
GO:0048655	anther wall tapetum morphogenesis
GO:0048656	anther wall tapetum formation
GO:0048657	anther wall tapetum cell differentiation
GO:0048658	anther wall tapetum development
GO:0055046	microgametogenesis
GO:0062074	pollen aperture
GO:0062075	pollen aperture formation
GO:0070505	pollen coat
GO:0070645	Ubisch body
GO:0080110	sporopollenin biosynthetic process
GO:0080128	anther septum development
GO:0080166	stomium development
GO:0120194	regulation of anther dehiscence
GO:0120195	positive regulation of anther dehiscence
GO:0120196	negative regulation of anther dehiscence
