# Supplementary material for: Long-Term Mild Heat Causes Post-Mitotic Pollen Abortion Through a Local Effect on Flowers
Source: Front Plant Sci. 2022 Jul 11;13:925754. doi: 10.3389/fpls.2022.925754 (PMC9310381; doi:10.3389/fpls.2022.925754)
Supplement: Supplementary file 3 [file Table_3.XLSX]

## Sheet: Table S5
Table S5. Gene expression analysis of CT and 4-day LTMH treatments.
ID	CT1	CT2	CT3	CT4	LTMH1	LTMH2	LTMH3	LTMH4	AVG CT	AVG LTMH	FC	P	FDR q	ITAG4.1 description
Solyc00g005050	21.89	34.6642	27.5092	30.4555	24.8458	23.5283	22.7948	16.9623	28.237	21.8043	-1.29502	0.140193	0.543469	#N/A
Solyc00g005100	17.0198	5.0148	67.8995	48.1062	30.7409	8.61189	20.3292	11.8708	22.9784	15.8984	-1.44532	0.444349	0.801039	#N/A
Solyc00g005840	82.9714	82.5795	55.3972	93.9533	125.934	93.5513	107.005	108.323	77.277	108.101	1.39888	0.0373306	0.323829	#N/A
Solyc00g006490	71.5981	71.185	76.021	56.9107	72.5112	40.7304	17.731	47.1434	68.5258	39.6387	-1.72876	0.0589798	0.386287	#N/A
Solyc00g006800	157.599	204.522	178.343	168.574	137.634	121.683	148.392	181.187	176.435	145.671	-1.21119	0.0637447	0.397693	#N/A
Solyc00g006810	88.332	114.908	86.2636	111.099	85.7523	110.635	111.638	120.974	99.312	106.392	1.07129	0.589911	0.872474	#N/A
Solyc00g006830	94.6122	106.889	91.597	118.535	73.8492	80.7151	76.3054	115.215	102.365	85.0827	-1.20312	0.139766	0.543015	#N/A
Solyc00g007060	18.6514	16.1883	11.0771	15.6738	15.0884	14.7131	12.1781	11.9301	15.1313	13.4012	-1.12911	0.423333	0.788817	#N/A
Solyc00g007090	38.793	39.2043	36.616	35.9555	39.3999	41.7115	29.5642	33.325	37.6167	35.6715	-1.05453	0.719831	0.917443	#N/A
Solyc00g007100	52.1935	89.7325	49.2804	58.7985	79.7297	62.7693	79.5769	61.3066	60.6948	70.2936	1.15815	0.350311	0.746072	#N/A
Solyc00g007140	44.7862	20.8532	22.9949	26.227	33.1886	44.3165	29.0545	32.8295	27.3952	34.4158	1.25627	0.249238	0.668525	#N/A
Solyc00g007150	49.515	27.6403	36.1105	28.6629	33.4806	30.9751	31.3772	28.334	34.4991	30.9872	-1.11334	0.445762	0.801584	#N/A
Solyc00g007200	27.7823	39.8037	24.3629	21.0716	33.9139	17.6301	26.9479	34.1939	27.4492	27.2443	-1.00752	0.975892	0.992772	#N/A
Solyc00g007260	25.3553	28.2192	23.9003	17.0887	8.84997	44.7181	38.2397	34.9778	23.2504	26.9732	1.16012	0.625877	0.883725	#N/A
Solyc00g007270	88.7865	89.1354	76.0432	70.8422	66.6403	48.732	82.4895	59.3666	80.8048	63.1499	-1.27957	0.0796717	0.435102	#N/A
Solyc00g007300	24.2527	16.827	19.9206	14.1339	31.3052	22.0823	23.1081	18.4065	18.4112	23.2862	1.26478	0.165988	0.578381	#N/A
Solyc00g008030	5.19449	3.91673	2.19201	3.24789	2.87251	14.7362	2.83959	4.13906	3.46919	4.72282	1.36136	0.503531	0.829487	#N/A
Solyc00g009030	13.8798	7.89223	8.65702	7.64078	24.7467	35.8244	6.17615	12.2545	9.22618	16.0945	1.74444	0.0982681	0.47056	#N/A
Solyc00g009040	78.4731	67.8297	53.3738	71.1707	97.6168	151.956	73.4944	67.8586	67.0568	92.7418	1.38303	0.123468	0.51645	#N/A
Solyc00g009050	10.6589	9.39103	10.4299	11.0506	7.84632	9.76525	8.4251	5.69778	10.3639	7.78767	-1.33081	0.0625685	0.394622	#N/A
Solyc00g009060	72.2439	57.9583	69.2857	89.2057	40.3999	49.5218	38.0683	76.2658	71.3244	49.0928	-1.45285	0.0414085	0.332417	#N/A
Solyc00g009080	111.916	92.0451	101.662	75.3054	105.268	112.094	87.9035	69.891	94.2366	92.2735	-1.02127	0.928891	0.979898	#N/A
Solyc00g009100	5.32512	10.4726	6.85363	7.4543	3.997	5.81123	4.72852	6.98709	7.30597	5.26327	-1.3881	0.138881	0.541801	#N/A
Solyc00g011890	151.234	163.427	152.966	228.715	117.177	218.87	159.974	151.65	171.481	157.936	-1.08576	0.59316	0.873888	#N/A
Solyc00g013110	68.2151	54.8853	50.0934	31.6849	27.075	38.1524	44.913	45.6901	49.3733	38.1567	-1.29396	0.183802	0.598018	Unknown protein
Solyc00g013120	208.298	295.298	264.132	217.548	216.715	222.965	184.465	181.298	243.827	200.497	-1.21611	0.121683	0.514048	#N/A
Solyc00g013320	3.68832	4.32406	24.3173	10.2098	22.2502	7.03486	8.00808	6.63954	7.93256	9.55133	1.20407	0.680504	0.904064	#N/A
Solyc00g014820	64.5567	49.8826	57.9854	54.6661	52.4654	48.9733	47.3398	35.7265	56.5239	45.6575	-1.238	0.0975053	0.46958	#N/A
Solyc00g017910	10.1903	8.29494	10.3562	11.5673	12.8737	7.19181	9.63825	14.0738	10.0313	10.5861	1.05531	0.737779	0.923207	#N/A
Solyc00g019970	193.474	241.941	208.697	299.388	279.323	164.19	230.807	150.527	232.552	199.793	-1.16397	0.285915	0.699255	Unknown protein
Solyc00g020010	187.005	173.43	202.743	199.762	164.926	114.12	137.852	121.798	190.375	133.33	-1.42785	0.00255967	0.109754	Unknown protein
Solyc00g020030	513.382	428.798	407.965	568.09	482.632	252.215	354.84	360.965	475.262	353.363	-1.34497	0.0437744	0.342571	Unknown protein
Solyc00g021630	5.70197	10.7274	4.10679	3.18395	5.76665	7.00292	22.6907	7.07867	5.31798	8.9743	1.68754	0.113216	0.4997	NADH-ubiquinone oxidoreductase chain 6 (AHRD V3.3 *** A0A0C5B7I5_9SOLA)
Solyc00g021650	100.346	86.2416	122.629	173.605	163.164	98.4148	158.854	93.8716	116.505	124.395	1.06773	0.768589	0.935678	Unknown protein
Solyc00g021660	7.60484	13.9712	12.2399	11.3964	13.2232	8.89239	8.96772	8.99314	11.0336	9.86818	-1.1181	0.504321	0.830252	Neutral/alkaline invertase (AHRD V3.3 *-* V5N411_MANES)
Solyc00g022070	59.2267	53.8109	30.2119	35.9566	28.6397	43.7916	28.4918	26.9824	43.1356	31.3357	-1.37656	0.162047	0.571855	Unknown protein
Solyc00g022090	273.465	381.298	348.298	354.693	302.382	318.257	298.144	277.045	336.894	298.591	-1.12828	0.336042	0.734498	Unknown protein
Solyc00g023710	37.9983	36.4416	42.9644	49.3766	27.0591	34.0481	31.9947	31.2394	41.3998	30.9775	-1.33645	0.0372699	0.323763	Unknown protein
Solyc00g025300	18.7651	14.1853	6.02423	14.3227	21.121	10.9598	12.7861	8.86066	12.3106	12.7257	1.03372	0.904824	0.972644	transmembrane protein Chr2:3268932-3269906 FORWARD LENGTH=324 201606 (AHRD V3.3 --* AT2G07674.2)
Solyc00g025530	8.24249	9.18368	13.2674	9.588	10.0332	10.1385	9.31216	7.05446	9.90597	9.04131	-1.09563	0.59282	0.873691	#N/A
Solyc00g026880	10.8776	8.13031	12.8002	6.3215	11.7801	14.8283	7.10122	11.711	9.19747	10.9785	1.19364	0.385736	0.767708	#N/A
Solyc00g026890	9.94925	6.98228	13.4328	13.6916	15.8736	13.8626	8.48127	8.89145	10.6317	11.3498	1.06754	0.786875	0.941442	#N/A
Solyc00g028100	7.59658	6.42073	3.81319	6.35493	13.2725	16.0473	3.41133	12.7825	5.86341	9.81688	1.67426	0.129797	0.528037	#N/A
Solyc00g028530	6.85515	8.86569	8.70058	8.66424	8.85873	7.68835	7.46363	10.5477	8.2272	8.55713	1.0401	0.756951	0.932923	#N/A
Solyc00g029090	8.76977	9.4585	33.0893	14.8984	9.56847	7.8628	48.9664	17.6869	14.2203	15.9769	1.12353	0.820057	0.951365	#N/A
Solyc00g030110	9.1566	11.2247	14.8621	14.3625	11.7679	11.8744	15.0716	12.9591	12.1704	12.8532	1.0561	0.739749	0.924543	#N/A
Solyc00g030510	8.85805	21.6485	40.0249	11.4087	20.1465	42.3638	9.46985	28.3088	17.2021	21.8708	1.2714	0.559755	0.858358	#N/A
Solyc00g030520	32.2601	19.7037	18.0688	33.3823	13.8697	23.9469	22.3648	24.9482	24.8837	20.7482	-1.19932	0.411457	0.781144	#N/A
Solyc00g031060	35.4123	31.3187	77.1986	48.0826	50.4551	46.2902	54.4723	53.5464	45.0442	51.0887	1.13419	0.497576	0.826675	#N/A
Solyc00g031380	14.3582	16.0272	17.976	16.1216	15.1823	11.1228	12.4245	24.2208	16.07	15.0143	-1.07031	0.732648	0.920487	#N/A
Solyc00g031720	3.76674	8.73345	8.34308	8.84997	7.35037	5.66589	6.75775	7.73782	7.02029	6.83124	-1.02767	0.888381	0.967949	#N/A
Solyc00g031730	19.7222	15.8798	41.0108	23.5976	25.1017	24.0722	29.8907	28.1712	23.4634	26.7079	1.13828	0.504796	0.830595	#N/A
Solyc00g036530	18.845	14.8185	17.2392	12.5671	14.0474	10.655	26.4088	13.3312	15.6834	15.151	-1.03514	0.869732	0.963834	Unknown protein
Solyc00g036740	11.2581	9.95238	18.4101	9.35625	14.5458	11.4144	12.2313	11.062	11.7866	12.2426	1.03869	0.834464	0.95501	#N/A
Solyc00g036750	3.92391	8.16928	21.1835	3.90804	7.61688	6.19473	13.3712	9.16254	7.17736	8.7196	1.21488	0.581252	0.870409	#N/A
Solyc00g036760	12.1208	12.8834	22.3562	16.073	25.6375	12.2383	16.1116	19.1626	15.3909	17.642	1.14626	0.52412	0.838607	#N/A
Solyc00g041200	21.7537	22.9306	45.6347	29.7183	38.8258	26.9756	32.5344	36.4337	28.6792	33.3799	1.1639	0.44092	0.797731	#N/A
Solyc00g041210	8.37589	9.67736	15.4177	16.5524	10.1937	11.1427	10.8409	9.26146	11.9927	10.334	-1.16052	0.408028	0.77989	#N/A
Solyc00g042840	6.37251	7.06843	6.11884	11.074	18.4228	16.4333	10.3135	14.4072	7.43279	14.5635	1.95936	0.00762977	0.167395	#N/A
Solyc00g050430	68.7047	61.85	46.7384	61.0966	72.4193	75.9563	66.3724	65.642	59.0207	69.9676	1.18547	0.190463	0.602669	#N/A
Solyc00g052530	61.5773	78.8581	143.204	128.672	161.048	84.9637	54.8318	92.6907	97.2584	91.3197	-1.06503	0.780854	0.938632	Unknown protein
Solyc00g052940	31.7235	25.0864	27.993	33.0216	15.9473	20.8123	32.693	46.2642	29.2864	26.6181	-1.10025	0.672165	0.902919	#N/A
Solyc00g053440	214.284	307.591	282.9	262.072	313.156	434.893	174.491	309.542	264.395	292.859	1.10766	0.558608	0.858143	#N/A
Solyc00g053740	57.4488	46.9399	90.6219	94.757	112.505	85.7732	47.7039	52.5139	69.3692	70.1194	1.01081	0.962647	0.98896	#N/A
Solyc00g055970	10.7461	10.0554	18.7916	8.9668	12.0196	11.3301	12.6456	13.2153	11.6162	12.2825	1.05736	0.746948	0.928211	#N/A
Solyc00g057880	7.24822	8.78249	5.96177	10.9954	7.37971	13.8077	21.6364	12.9148	8.03726	12.99	1.61622	0.0609861	0.390761	#N/A
Solyc00g058900	5.83534	5.19449	3.73194	2.65469	6.24193	4.09919	56.1319	8.86738	4.16284	10.6232	2.55191	0.0841216	0.444172	#N/A
Solyc00g059100	6.6185	8.66387	14.5378	6.96337	7.99541	4.87582	18.0684	6.87726	8.72866	8.34269	-1.04626	0.8696	0.963811	#N/A
Solyc00g067470	14.8334	9.9432	14.2574	10.4946	13.3289	8.11668	16.041	11.2453	12.1883	11.8193	-1.03122	0.859965	0.961434	#N/A
Solyc00g069880	53.3945	41.924	41.9038	46.6995	60.4418	60.6083	80.8035	45.7458	45.749	60.6615	1.32596	0.0589509	0.386287	Photosystem II CP43 reaction center protein (AHRD V3.3 *-* A0A2G2YCL7_CAPAN)
Solyc00g082150	6.90394	6.21896	6.61752	7.4443	8.58416	6.5144	6.0399	11.423	6.78162	7.88126	1.16215	0.425253	0.790436	#N/A
Solyc00g084750	32.4345	28.2192	8.93932	9.94925	30.5329	10.9598	15.9264	35.8217	16.8912	20.903	1.23751	0.67436	0.903353	Pentatricopeptide repeat-containing protein (AHRD V3.11 *-* tr|A0A2G2XDN3|A0A2G2XDN3_CAPBA)
Solyc00g090430	5.47283	5.932	11.1958	19.178	7.73255	7.54848	9.55051	7.97593	9.1373	8.16578	-1.11898	0.663448	0.899243	DUF789 domain-containing protein (AHRD V3.11 *** tr|A0A1Q3BTC9|A0A1Q3BTC9_CEPFO)
Solyc00g093000	823.382	917.465	695.465	871.548	585.507	1145.97	590.715	673.632	822.601	718.83	-1.14436	0.331043	0.730562	#N/A
Solyc00g094520	229.298	227.417	282.746	315.464	293.048	350.823	264.048	165.915	261.151	259.059	-1.00808	0.964058	0.989835	orf100 (mitochondrion) (AHRD V3.3 *** YP_005090391.1)
Solyc00g096460	71.7603	88.1663	103.211	83.5571	53.4174	72.2823	46.8396	61.4665	85.9456	57.742	-1.48844	0.024207	0.275451	#N/A
Solyc00g099470	8.86897	8.73914	14.8441	7.88221	10.5879	8.62889	11.8412	10.1606	9.75856	10.2393	1.04926	0.800113	0.944309	#N/A
Solyc00g104940	33.07	13.2827	24.1876	25.7287	30.8501	5.82907	44.2499	28.782	22.8656	21.8762	-1.04523	0.91752	0.977134	#N/A
Solyc00g107550	134.548	161.798	86.2151	159.798	158.548	213.298	102.715	141.048	131.599	148.778	1.13054	0.507779	0.831435	#N/A
Solyc00g110060	9.17163	9.41304	12.2745	9.75731	11.075	9.64788	9.4585	12.1027	10.0839	10.5165	1.0429	0.772577	0.936309	#N/A
Solyc00g110870	336.756	405.321	443.5	331.045	416.371	415.126	241.317	255.328	376.248	321.245	-1.17122	0.293296	0.702825	#N/A
Solyc00g111270	19.9665	19.8003	32.5506	29.8441	22.7116	18.4493	24.0858	29.3659	24.8942	23.3323	-1.06694	0.68062	0.904064	#N/A
Solyc00g112190	13.4655	32.3627	6.39117	9.48366	8.47326	7.46788	11.6222	7.39891	12.7484	8.58868	-1.48433	0.196791	0.609338	Unknown protein
Solyc00g112500	11.5608	12.4429	17.1147	13.9106	16.6161	10.0349	24.3053	15.6417	13.6037	15.8675	1.16641	0.494797	0.825784	#N/A
Solyc00g112830	9.08135	11.0196	13.2078	10.7759	13.8165	10.0639	11.1153	13.3153	10.9245	11.9773	1.09637	0.552093	0.855327	#N/A
Solyc00g113730	10.1133	10.0677	11.8937	10.8712	13.7926	8.0994	6.89651	8.11959	10.7116	8.89335	-1.20445	0.291285	0.700441	#N/A
Solyc00g113740	16.5771	12.5327	28.217	12.0563	33.548	20.8196	15.5761	20.2489	16.305	21.6645	1.32871	0.25161	0.670782	#N/A
Solyc00g120120	12.5931	11.143	30.2932	18.4678	23.015	18.4832	19.6916	15.5427	16.7388	18.9954	1.13482	0.55391	0.855883	#N/A
Solyc00g126000	1168.88	1130.38	861.382	1357.47	830.507	865.965	1028.47	1004.34	1114.88	928.386	-1.20089	0.0611057	0.391306	orf300 gene product (mitochondrion) (AHRD V3.3 *-* NP_064003.1)
Solyc00g127540	19.0193	18.7016	47.4991	23.933	33.4765	26.555	37.8624	17.4327	25.2167	27.6767	1.09755	0.693463	0.909933	#N/A
Solyc00g127550	8.3998	9.65689	17.4268	10.0686	13.0187	8.69781	9.34085	11.7327	10.9225	10.5546	-1.03486	0.863899	0.961907	#N/A
Solyc00g128870	31.0102	18.4042	21.1158	31.7823	18.3416	14.9499	27.2621	29.8972	24.8773	21.7428	-1.14416	0.484006	0.821497	#N/A
Solyc00g129670	8.96009	8.14429	18.7202	8.53173	12.4338	12.7138	10.9947	12.3204	10.3903	12.0969	1.16424	0.426407	0.790837	#N/A
Solyc00g129680	10.488	8.77195	16.9469	14.0941	15.7108	9.58375	17.6026	11.8031	12.1753	13.2992	1.09231	0.651185	0.894842	#N/A
Solyc00g129880	11.3111	5.75012	23.7817	8.17134	9.14641	12.9505	18.3739	16.9298	10.603	13.8547	1.30668	0.347303	0.744464	#N/A
Solyc00g129980	5.72754	5.34293	8.93932	5.02442	19.2507	6.56331	6.75775	9.94925	6.08884	9.60043	1.57673	0.0867312	0.448449	#N/A
Solyc00g133710	11.4028	14.8455	20.4857	13.6533	19.4022	17.7187	17.5433	17.3548	14.7511	17.9868	1.21936	0.313746	0.720135	#N/A
Solyc00g133720	11.1183	9.05267	16.6891	12.757	11.4386	10.4234	12.1369	14.8547	12.099	12.1085	1.00079	0.996338	0.998641	#N/A
Solyc00g134830	9.47556	5.77052	11.0979	10.4441	19.0055	11.8793	11.5818	12.0275	8.92241	13.317	1.49253	0.0396962	0.330948	#N/A
Solyc00g134840	35.5162	27.4111	46.0466	38.618	23.6112	24.3003	32.4809	29.6922	36.2731	27.2741	-1.32995	0.185938	0.59938	#N/A
Solyc00g135040	10.2042	8.97092	25.8917	13.6973	11.2935	19.9163	12.8084	13.5159	13.4231	14.0473	1.0465	0.845646	0.957502	#N/A
Solyc00g135050	8.29896	13.7914	11.8784	8.43125	15.6458	10.0459	7.59961	10.2164	10.3471	10.5104	1.01578	0.930591	0.981048	#N/A
Solyc00g139760	11.0234	19.0312	25.4747	17.4899	19.8126	11.3455	14.7878	15.3682	17.4852	15.034	-1.16305	0.442112	0.799203	#N/A
Solyc00g140060	30.9797	19.3037	26.473	21.2002	22.8169	26.0845	20.3579	24.2198	24.0694	23.2748	-1.03414	0.866222	0.962694	#N/A
Solyc00g143770	149.465	202.132	191.215	144.132	189.548	196.882	156.798	167.798	169.869	177.017	1.04208	0.73416	0.920926	#N/A
Solyc00g144470	55.944	17.2145	40.6463	16.2099	17.6012	29.7769	13.102	11.7927	28.2236	16.8692	-1.67309	0.151189	0.557239	Aminotransferase-like%2C plant mobile domain family protein Chr2:1712149-1714599 FORWARD LENGTH=667 201606 (AHRD V3.11 *-* AT2G04865.2)
Solyc00g156980	701.465	634.798	844.311	540.895	481.77	510.859	752.543	571.398	671.528	570.365	-1.17737	0.161105	0.571855	#N/A
Solyc00g170200	66.5659	74.54	62.3673	51.0418	26.1563	42.7574	47.8859	58.5507	63.0422	42.0806	-1.49813	0.0622456	0.394579	#N/A
Solyc00g181240	8.72831	12.3293	6.50549	15.5769	8.93864	12.0014	4.90748	6.28893	10.219	7.5855	-1.34717	0.230751	0.649183	Unknown protein
Solyc00g186050	36.4366	14.9621	49.0716	29.5345	32.9932	22.9107	25.7614	31.5563	29.8142	27.9982	-1.06486	0.793588	0.943332	#N/A
Solyc00g187050	1326.38	2121.72	1276.38	753.048	2440.8	2993.47	2351.47	1875.47	1282.45	2382.53	1.8578	0.00745818	0.167395	#N/A
Solyc00g206460	32.637	38.0022	20.7094	18.8992	17.6289	13.6691	24.6747	22.8297	26.3956	19.1946	-1.37516	0.233438	0.65186	#N/A
Solyc00g244280	111.132	109.048	248.048	182.465	141.548	129.048	175.965	167.798	153.036	152.394	-1.00421	0.987848	0.99633	senescence-associated carboxylesterase 101-like isoform X3 (AHRD V3.3 *-* XP_024928153.1)
Solyc00g256710	4.40955	12.3911	6.66695	4.10976	45.0825	4.72227	5.55248	6.05351	6.22032	9.19736	1.4786	0.389504	0.76966	#N/A
Solyc00g282510	35.7827	58.4592	32.3386	40.0343	99.916	97.6202	30.2307	34.3191	40.5667	56.4014	1.39034	0.288201	0.699875	#N/A
Solyc00g294230	23.3981	32.5895	11.711	3.06744	6.80968	6.06037	24.7995	42.6381	12.8649	14.4533	1.12347	0.828507	0.954119	#N/A
Solyc00g304030	7.91161	8.31904	13.802	11.6791	13.0989	10.633	10.6276	9.71027	10.149	10.9494	1.07886	0.664014	0.899901	Zf-RVT domain-containing protein (AHRD V3.11 *-* tr|A0A1Q3ATX4|A0A1Q3ATX4_CEPFO)
Solyc00g309530	80.7309	91.7984	103.196	96.1188	59.4374	52.4609	92.6378	87.6318	92.5948	70.931	-1.30542	0.0936879	0.462619	Unknown protein
Solyc00g311230	274.86	164.743	173.448	231.841	162.675	147.04	234.433	217.617	206.571	186.903	-1.10523	0.475259	0.815504	#N/A
Solyc01g005000	6.42632	6.12905	9.13988	4.66737	11.6103	14.5462	6.10924	9.36855	6.40239	9.91546	1.54871	0.0410122	0.332212	Glutamate decarboxylase (AHRD V3.3 *** B1Q3F2_SOLLC)
Solyc01g005010	64.2196	53.7774	70.9111	85.7814	46.3952	47.8356	77.3559	51.9508	67.7008	54.6484	-1.23884	0.168617	0.582922	protein XRI1-like (AHRD V3.11 *** tr|A0A2I4FA04|A0A2I4FA04_9ROSI)
Solyc01g005020	68.8064	78.393	91.9633	66.0732	79.2962	72.7824	58.6636	57.8714	75.6635	66.5316	-1.13726	0.408692	0.77989	Salt Overly Sensitive 1
Solyc01g005080	27.1016	18.1122	20.2641	40.5196	32.2079	18.624	18.8617	22.9144	25.1965	22.5648	-1.11663	0.619714	0.881792	65-kDa microtubule-associated protein 6 (AHRD V3.3 *** A0A2G2XSF2_CAPBA),Pfam:PF03999
Solyc01g005100	114.603	99.1318	77.7702	85.724	101.719	85.3146	71.7984	101.6	93.2892	89.1988	-1.04586	0.71885	0.917053	2-oxoglutarate (2OG) and Fe(II)-dependent oxygenase superfamily protein (AHRD V3.3 *** AT1G68080.1)
Solyc01g005130	53.1279	74.8098	67.4455	62.9893	74.9296	82.8727	23.3832	35.3877	64.1025	47.6108	-1.34639	0.296339	0.705769	Zinc finger protein 1 (AHRD V3.11 *** tr|A0A2G2XSH3|A0A2G2XSH3_CAPBA)
Solyc01g005210	122.426	116.301	95.488	88.4322	86.6686	107.325	122.426	88.8987	104.714	100.307	-1.04393	0.723159	0.918699	Trehalose-6-phosphate synthase (AHRD V3.3 *** E5GC29_CUCME)
Solyc01g005240	62.8125	63.1712	63.4225	28.7117	19.5359	34.0656	30.0182	31.7917	51.8462	28.2301	-1.83656	0.0526647	0.36843	Aspartokinase (AHRD V3.3 *** A0A2I4FQZ8_9ROSI)
Solyc01g005260	12.1347	11.5594	10.6869	3.83949	7.43242	5.73932	3.78441	7.46088	8.71009	5.89108	-1.47852	0.253021	0.671369	#N/A
Solyc01g005270	11.8783	22.7928	6.20743	5.12186	11.6693	7.00799	4.86043	7.5047	9.63214	7.39029	-1.30335	0.49652	0.826459	#N/A
Solyc01g005280	33.447	25.8886	33.8191	34.1858	31.902	29.1095	19.8799	33.3808	31.6314	28.0182	-1.12896	0.406427	0.77894	Sec14p-like phosphatidylinositol transfer family protein (AHRD V3.3 *** A0A1Y1I4L4_KLENI)
Solyc01g005290	8.10526	61.291	36.1506	17.9309	80.469	59.1531	8.70194	12.3911	23.8216	26.766	1.1236	0.852783	0.958981	Sec14p-like phosphatidylinositol transfer family protein (AHRD V3.3 *** A0A1Y1I4L4_KLENI)
Solyc01g005440	138.159	131.215	76.8999	109.103	124.496	148.132	194.315	131.572	111.053	147.356	1.3269	0.0694729	0.414084	Jasmonate ZIM-domain protein 2 (AHRD V3.3 *** B3Y562_TOBAC)
Solyc01g005460	27.5014	31.7664	23.7359	22.1642	17.569	18.6176	26.0805	25.9928	26.0373	21.7	-1.19987	0.288885	0.699885	Dynein light chain (AHRD V3.3 *** A0A1U8EJW7_CAPAN)
Solyc01g005490	47.337	37.4779	58.6391	51.0554	60.0155	45.0746	63.654	36.7205	48.0067	50.1455	1.04455	0.792558	0.943332	IAA-amino acid hydrolase IL.1
Solyc01g005520	64.4156	66.1677	32.7595	105.453	117.57	101.787	134.562	96.9213	61.9453	111.772	1.80437	0.00869122	0.179634	Protein LOW PSII ACCUMULATION 1, chloroplastic (AHRD V3.3 *-* A0A1J3E7D8_NOCCA)
Solyc01g005540	17.0798	8.37392	12.3873	9.94844	8.53788	17.3413	19.637	15.9161	11.5222	14.6668	1.27292	0.311341	0.719033	Lysine--tRNA ligase (AHRD V3.11 *** tr|A0A1U8HGH5|A0A1U8HGH5_CAPAN)
Solyc01g005580	152.03	153.59	205.246	168.084	219.009	254.652	142.935	155.882	168.47	187.752	1.11446	0.426185	0.790837	hypothetical protein (DUF1639) (AHRD V3.3 *** AT1G55340.1)
Solyc01g005590	40.7684	26.7104	39.3121	30.9212	39.3059	31.5774	42.291	46.994	33.9192	39.6307	1.16838	0.249909	0.668883	Unknown protein
Solyc01g005640	73.5555	79.3664	71.8334	66.6185	70.055	39.0435	64.3852	43.2678	72.7015	52.5393	-1.38375	0.0356474	0.321406	Histidine-tRNA ligase (AHRD V3.3 *** A0A1I9LTH3_ARATH)
Solyc01g005650	19.7438	8.50937	12.6927	19.9465	11.8765	16.7494	51.8256	28.1637	14.3611	23.2129	1.61638	0.144485	0.548867	RBR-type E3 ubiquitin transferase (AHRD V3.3 *** A0A2G2W4Q8_CAPBA)
Solyc01g005690	111.545	153.737	156.842	169.1	161.921	136.562	200.175	195.558	146.036	171.526	1.17455	0.20341	0.617008	Calcium ion binding protein (AHRD V3.11 *** tr|A0A2U1KGE3|A0A2U1KGE3_ARTAN)
Solyc01g005820	55.6039	62.9114	63.4113	55.8182	60.67	53.8105	53.4313	44.4295	59.3191	52.7627	-1.12426	0.317694	0.722597	Serine/arginine-rich-splicing factor SCL30A (AHRD V3.3 *** A0A0M9UMR8_NICAT)
Solyc01g005830	15.8917	17.5537	18.6345	20.3831	11.844	19.7078	19.3904	12.1754	18.0419	15.3215	-1.17755	0.357883	0.750019	Glucan endo-1,3-beta-glucosidase 4 (AHRD V3.3 *-* A0A2G2XNZ6_CAPBA)
Solyc01g005920	95.4105	69.3956	58.0718	19.4319	16.6577	7.51674	162.629	167.533	52.282	42.9769	-1.21651	0.769979	0.935678	Amino acid/polyamine transporter I (AHRD V3.3 *** A0A200RCI7_9MAGN)
Solyc01g005930	17.1019	8.40796	11.5015	15.8448	9.12439	9.17057	15.1612	10.5786	12.7231	10.7632	-1.1821	0.459131	0.808876	Lipase/lipooxygenase%2C PLAT/LH2 family protein (AHRD V3.3 *** AT1G55280.2)
Solyc01g005990	43.6441	31.0502	52.6146	29.3561	17.8683	23.3849	42.2472	32.8206	38.0363	27.5893	-1.37866	0.141938	0.545546	#N/A
Solyc01g006000	66.7844	43.3525	56.9786	69.7201	50.3932	45.8847	55.7964	48.1331	58.2358	49.9198	-1.16659	0.244937	0.663341	GPI mannosyltransferase 2 (AHRD V3.3 *** A0A2G3DEG8_CAPCH)
Solyc01g006010	361.406	256	328.621	363.062	287.836	239.822	309.858	229.877	324.136	264.803	-1.22407	0.0630837	0.39641	Branchpoint-bridging protein (AHRD V3.3 *-* A0A1J3JYE2_NOCCA)
Solyc01g006020	91.5997	88.5767	74.0055	93.9146	73.6067	92.0457	68.673	70.0741	86.6568	75.5642	-1.1468	0.194775	0.607275	#N/A
Solyc01g006030	242.227	252.624	261.026	276.444	196.744	317.451	283.123	216.684	257.779	248.797	-1.0361	0.761507	0.933837	#N/A
Solyc01g006040	27.1012	36.5944	44.3039	37.5457	34.1257	17.9979	16.2251	27.7428	35.8386	22.9303	-1.56293	0.0894758	0.454513	E3 ubiquitin protein ligase (AHRD V3.3 *** A0A2I4FSG3_9ROSI)
Solyc01g006090	39.9337	22.1593	30.0434	25.648	15.6405	15.9067	48.831	15.8067	28.7359	20.9335	-1.37272	0.244034	0.662008	Eukaryotic rRNA processing (AHRD V3.3 *** A0A2U1PZE8_ARTAN)
Solyc01g006100	68.646	82.1561	84.1592	64.0837	76.3707	46.8138	41.4627	69.0664	74.2636	56.5661	-1.31286	0.0933705	0.462619	cytosine-5 DNA methyltransferase1L
Solyc01g006130	122.632	98.2151	116.132	60.2151	40.8907	99.4651	182.798	137.798	95.7987	100.607	1.05019	0.859269	0.961238	#N/A
Solyc01g006150	34.8401	17.469	22.1864	34.3278	24.186	27.9218	23.8979	28.4719	26.0928	26.0358	-1.00219	0.989934	0.996667	Cation efflux protein (AHRD V3.3 *** A0A200PY73_9MAGN)
Solyc01g006160	1152.38	1107.99	1199.55	1231.31	838.466	835.599	1091.42	824.382	1171.87	891.048	-1.31516	0.00208876	0.100874	60S acidic ribosomal protein .1
Solyc01g006170	139.587	114.496	114.387	108.947	48.2194	37.0152	147.064	76.9872	118.797	67.0474	-1.77184	0.0411367	0.332417	Eukaryotic rRNA processing (AHRD V3.11 *** tr|A0A2U1PZE8|A0A2U1PZE8_ARTAN)
Solyc01g006180	14.4159	12.0419	28.5816	25.7474	6.90324	14.7362	13.102	22.3065	18.9055	13.1311	-1.43975	0.222503	0.637168	P-loop containing nucleoside triphosphate hydrolases superfamily protein (AHRD V3.3 *** A0A2U1MH74_ARTAN)
Solyc01g006210	12.9538	13.9911	19.583	12.0202	12.3813	6.77174	10.4867	11.0183	14.3718	9.92099	-1.44862	0.046738	0.352611	Non-structural maintenance of chromosomes element.1
Solyc01g006220	113.295	101.303	114.072	111.278	92.5795	64.1889	96.9589	66.9556	109.864	78.8111	-1.39402	0.0544122	0.372214	histone-lysine N-methyltransferase ASHH3 (AHRD V3.3 *** A0A1S4DKJ0_TOBAC)
Solyc01g006230	57.9399	98.4463	61.8214	72.5817	101.535	92.8159	60.8366	66.1318	71.1272	78.4699	1.10323	0.519669	0.836521	Cysteine protease (AHRD V3.3 *** A0A2G3AHQ7_CAPAN)
Solyc01g006250	73.8173	74.8538	67.3593	76.2899	82.3887	60.4808	56.9133	54.7648	72.9977	62.7769	-1.16281	0.217264	0.63326	F-box protein (AHRD V3.3 *** A0A2G3AHK9_CAPAN)
Solyc01g006320	41.474	32.2403	28.5505	25.7892	18.931	21.724	25.9662	28.5696	31.4997	23.5021	-1.34029	0.068655	0.410728	Late embryogenesis abundant (LEA) hydroxyproline-rich glycoprotein family (AHRD V3.3 *** Q9LJT9_ARATH)
Solyc01g006330	48.9437	33.7554	14.1256	37.1632	14.7784	12.5213	43.2052	28.5005	30.5169	21.8482	-1.39676	0.307491	0.715996	Plastid-lipid associated protein PAP / fibrillin family protein (AHRD V3.11 *** tr|A0A2U1MH95|A0A2U1MH95_ARTAN)
Solyc01g006340	50.2794	36.385	38.7024	41.8807	37.6165	42.7534	68.8091	54.6498	41.4969	49.5902	1.19503	0.229363	0.646792	DEAD-box ATP-dependent RNA helicase .1
Solyc01g006350	107.655	86.1488	103.144	61.7551	65.3591	96.3206	66.6464	111.308	87.6698	82.6669	-1.06052	0.705479	0.913453	Callose synthase.1
Solyc01g006390	19.2644	27.2597	21.9831	18.1816	27.7878	28.0974	22.1982	19.0627	21.4042	23.9748	1.1201	0.447735	0.801667	Pistil extensin like protein, partial CDS only (AHRD V3.3 *-* Q7DLN2_TOBAC)
Solyc01g006400	192.082	144.315	242.484	132.781	188.952	173.008	173.643	119.454	172.844	161.368	-1.07111	0.622005	0.882419	Pistil extensin like protein, partial CDS only (AHRD V3.3 *-* Q7DLN2_TOBAC)
Solyc01g006440	4.12091	4.92763	4.05972	3.19012	9.9286	6.32754	22.4066	5.30828	4.02702	9.29743	2.30876	0.00618047	0.153181	Protein NRT1/ PTR FAMILY 7.1
Solyc01g006450	425.251	355.116	360.048	295.493	236.679	239.701	362.288	331.153	356.025	287.229	-1.23952	0.0685065	0.410711	#N/A
Solyc01g006480	49.4267	40.3705	56.1279	44.3677	33.8742	32.5284	35.3364	48.9056	47.2137	37.1474	-1.27098	0.217698	0.634035	Alpha/beta-Hydrolases superfamily protein (AHRD V3.3 *** Q8GYI7_ARATH)
Solyc01g006500	29.1992	15.6645	22.1171	17.4514	16.2163	20.3361	20.7323	26.4488	20.498	20.6214	1.00602	0.974347	0.992296	Pentatricopeptide repeat-containing protein (AHRD V3.11 *** tr|A0A2I0XE98|A0A2I0XE98_9ASPA)
Solyc01g006510	17.5008	14.8023	17.7609	10.4423	27.4731	20.0181	15.8813	20.2981	14.8051	20.5196	1.38598	0.123452	0.51645	sorbitol related enzyme
Solyc01g006560	17.4612	3.88438	5.29946	8.33943	8.28908	31.7886	16.3684	8.88315	7.39931	13.9906	1.89081	0.0836458	0.443533	#N/A
Solyc01g006680	37.191	31.3363	65.7546	71.5633	17.4258	18.8265	45.3225	23.066	48.3922	24.1998	-1.99969	0.0115095	0.201887	2-oxoglutarate (2OG) and Fe(II)-dependent oxygenase superfamily protein (AHRD V3.3 *** A0A2U1NBL4_ARTAN)
Solyc01g006700	41.4097	28.1642	27.0724	6.16761	10.9983	27.8084	17.4203	16.0125	21.0068	17.0905	-1.22915	0.548955	0.854021	downstream neighbor of Son (AHRD V3.3 *** AT3G54750.4)
Solyc01g006710	134.451	71.6623	94.01	97.2665	88.1806	81.7532	88.6866	72.2783	96.8831	82.4491	-1.17507	0.305621	0.714157	Helicase (AHRD V3.3 *** A0A200PRN8_9MAGN)
Solyc01g006730	5.50074	3.91673	6.42073	3.4708	8.84997	27.3243	13.102	3.71273	4.68101	10.4143	2.2248	0.0674034	0.408159	#N/A
Solyc01g006740	11.9682	8.06715	10.5875	8.32731	8.61622	15.6554	6.59624	10.2628	9.60533	9.77544	1.01771	0.923668	0.979221	Sucrose-phosphatase (AHRD V3.3 *** Q84ZX6_SOLLC)
Solyc01g006830	108.965	149.188	154.616	141.225	114.88	131.991	160.747	138.287	137.261	135.497	-1.01302	0.920574	0.97844	Protein WVD2-like.1
Solyc01g006900	177.034	156.653	163.647	131.143	122.745	106.501	146.778	114.654	156.193	121.787	-1.28251	0.0180074	0.242616	MD-2-related lipid recognition domain-containing protein / ML domain-containing protein (AHRD V3.3 *** A0A2U1NF61_ARTAN)
Solyc01g006920	9.38738	11.305	9.25558	8.71263	15.6591	11.832	11.4981	8.91639	9.61817	11.7398	1.22058	0.195709	0.607976	Pentatricopeptide repeat-containing protein (AHRD V3.3 *** A0A2G2XTB6_CAPBA)
Solyc01g006960	25.3171	46.9991	32.7418	17.4667	30.959	38.8193	40.5954	57.9282	28.7213	41.0016	1.42757	0.151453	0.557239	Trafficking protein particle complex subunit 8 (AHRD V3.3 *** A0A1J3IJK6_NOCCA)
Solyc01g006970	89.2551	69.1101	53.6653	58.371	93.0068	65.313	59.8053	85.5996	66.3004	74.6761	1.12633	0.521324	0.837448	RNA helicase family protein (AHRD V3.3 *** A0A2U1PBZ9_ARTAN)
Solyc01g006980	115.6	157.907	159.664	115.465	97.3001	182.024	128.339	130.92	135.442	131.342	-1.03122	0.840365	0.956154	Malonyl CoA-acyl carrier protein transacylase containing protein, expressed (AHRD V3.3 *** Q10MS3_ORYSJ)
Solyc01g007070	288.587	260.455	212.382	268.122	253.219	316.215	386.298	366.051	255.779	326.202	1.27533	0.0300225	0.296206	BEL1-like homeodomain protein 3 (AHRD V3.3 *** A0A2G3AY56_CAPCH)
Solyc01g007120	62.9156	61.6214	36.7826	51.9941	28.1255	42.9879	54.2324	55.0154	52.1821	43.581	-1.19736	0.322856	0.725541	Protein serine/threonine kinase (AHRD V3.3 *** F4J3A9_ARATH)
Solyc01g007130	80.8786	55.0797	46.2817	54.8853	63.0252	80.3405	80.6651	82.3463	57.9993	76.1543	1.31302	0.130224	0.52844	Receptor protein kinase (AHRD V3.3 *** A0A2R6R7M6_ACTCH)
Solyc01g007140	51.5058	57.7427	45.0693	59.2249	59.4647	43.5664	65.1911	53.5331	53.0805	54.8347	1.03305	0.853496	0.958981	ARM repeat superfamily protein (AHRD V3.3 *** AT5G06350.2)
Solyc01g007150	49.1352	48.5466	23.5472	55.2064	29.1573	23.7114	30.0321	42.3886	41.9634	30.6291	-1.37005	0.145869	0.550845	Coatomer subunit beta (AHRD V3.3 *** A0A1U8EGF1_CAPAN)
Solyc01g007170	32.9795	26.8152	18.3655	24.4036	18.4059	26.9731	15.7195	17.8357	25.0912	19.3154	-1.29902	0.135687	0.534829	C2 calcium/lipid-binding plant phosphoribosyltransferase family protein (AHRD V3.3 *** A0A061F065_THECC)
Solyc01g007180	13.9633	22.8229	12.4202	25.4778	7.79242	14.5735	12.6141	13.9442	17.8202	11.8883	-1.49896	0.111157	0.495265	Spc97/Spc98 family of spindle pole body (SBP) component (AHRD V3.3 *** A0A2K3MUW2_TRIPR)
Solyc01g007190	17.0093	9.89299	10.0534	7.71864	7.53092	7.91907	31.3749	13.0225	10.6897	12.494	1.16878	0.601145	0.87608	#N/A
Solyc01g007220	18.8709	17.1939	13.9478	12.6936	23.5062	18.9557	20.0903	23.0047	15.4815	21.3025	1.376	0.0540795	0.37142	Late embryogenesis abundant (LEA) hydroxyproline-rich glycoprotein family (AHRD V3.11 *** tr|Q9SVC8|Q9SVC8_ARATH)
Solyc01g007230	203.715	188.455	190.447	167.574	164.459	168.191	247.735	248.213	187.091	203.081	1.08547	0.468846	0.812425	#N/A
Solyc01g007270	7.93552	21.332	20.7479	12.7672	21.0911	42.0102	4.53152	11.998	14.5519	14.815	1.01808	0.964443	0.989835	#N/A
Solyc01g007430	794.078	537.965	571.001	445.827	717.212	519.071	618.489	576.798	574.256	603.681	1.05124	0.657684	0.897091	#N/A
Solyc01g007580	59.6191	41.8535	34.6129	31.1194	39.3353	32.6271	55.0145	36.2073	40.4899	39.9861	-1.0126	0.946015	0.98497	30S ribosomal protein S8, chloroplastic (AHRD V3.11 --* sp|Q8S8V8|RR8_ATRBE)
Solyc01g007610	404.696	368.058	512.971	214.656	373.409	445.505	322.414	464.929	357.866	397.383	1.11043	0.586661	0.871928	#N/A
Solyc01g007660	13.3842	18.419	16.3686	10.2828	32.0218	23.9106	10.6184	20.8511	14.2724	20.2911	1.42171	0.162277	0.571855	#N/A
Solyc01g007720	88.9651	49.8826	77.2984	93.3818	107.382	155.882	87.3818	74.6318	75.2316	102.216	1.35868	0.0978613	0.469758	#N/A
Solyc01g007740	14.4863	12.2274	17.372	24.0067	12.5322	18.3652	17.9899	22.2699	16.4861	17.4258	1.057	0.789582	0.942496	#N/A
Solyc01g007760	9.94925	12.3911	15.4177	3.24789	30.5329	2.79911	21.8603	10.6524	8.86403	11.8774	1.33996	0.647779	0.892378	Transcription factor E2FA (AHRD V3.3 *** A0A2G2XS87_CAPBA)
Solyc01g007780	20.0905	11.9649	10.5632	15.8185	24.8857	11.4838	25.5747	22.3204	14.1568	20.0973	1.41962	0.113152	0.499661	HVA22-like protein (AHRD V3.3 *** A0A2G3AY13_CAPCH)
Solyc01g007790	41.7878	48.7476	32.46	47.1585	46.212	46.5373	50.3961	53.3521	42.0221	49.0373	1.16694	0.301166	0.711314	alpha/beta-Hydrolases superfamily protein (AHRD V3.3 *** AT3G11620.8)
Solyc01g007800	37.5092	35.0377	37.1563	23.5251	23.7809	39.7212	22.3326	27.1885	32.7385	27.5197	-1.18964	0.290474	0.699993	ovate family protein 2
Solyc01g007840	47.7621	38.0612	48.555	40.6343	36.5215	38.651	50.4988	51.6799	43.5184	43.8105	1.00671	0.960445	0.988581	Polynucleotidyl transferase, ribonuclease H-like superfamily protein (AHRD V3.3 *** A0A2U1M9A7_ARTAN)
Solyc01g007850	39.5008	31.6839	30.884	23.2838	35.1627	29.012	42.241	38.7403	30.8005	35.9451	1.16703	0.327661	0.72823	Pentatricopeptide repeat (AHRD V3.3 *** A0A200QMV9_9MAGN)
Solyc01g007870	412.812	329.859	339.607	310.952	418.869	449.801	343.713	291.529	346.288	370.675	1.07042	0.557204	0.857295	hypothetical protein (AHRD V3.3 *** AT5G06270.2)
Solyc01g007880	78.7972	81.395	38.9189	73.33	71.2781	62.2524	60.5752	89.8173	65.409	70.0958	1.07165	0.718423	0.917053	Phosphatidylinositol 4-phosphate 5-kinase (AHRD V3.3 *-* D7KW77_ARALL)
Solyc01g007910	70.4499	56.2783	87.3387	52.3189	26.0386	50.0832	54.7784	54.9825	65.2412	44.518	-1.4655	0.0525621	0.36843	succinyl-CoA ligase alpha.1
Solyc01g007930	52.6759	50.9737	55.0823	42.4784	56.5744	65.5945	87.1521	36.3791	50.0651	58.5672	1.16982	0.372815	0.759084	F-box protein (AHRD V3.11 *** tr|A0A2G2XSM3|A0A2G2XSM3_CAPBA)
Solyc01g007990	13.8002	14.8185	16.3921	21.4265	12.2355	15.2839	13.0203	13.6608	16.3708	13.5048	-1.21222	0.250999	0.66998	Cysteine-rich receptor-like protein kinase 2 (AHRD V3.3 *** A0A2G2XSC5_CAPBA)
Solyc01g008000	53.1708	19.9305	21.0299	16.0099	10.8505	15.3639	20.1515	16.6519	24.4402	15.3791	-1.58918	0.0715245	0.418786	ADP-ribosylation factor (AHRD V3.3 *** A0A2U1LV56_ARTAN)
Solyc01g008010	15.5605	7.52189	10.7467	6.0925	12.2152	16.1682	11.6327	17.6996	9.35633	14.2004	1.51773	0.0553288	0.376035	DUF220 domain-containing protein (AHRD V3.3 *** A0A1Q3AZ34_CEPFO)
Solyc01g008060	154.867	111.857	137.802	111.126	45.4495	83.6604	121.009	129.267	127.621	87.8189	-1.45323	0.0842442	0.444331	Ribonuclease H (AHRD V3.3 *** A0A2U1P3J3_ARTAN)
Solyc01g008070	149.67	121.625	89.0687	136.05	70.4697	38.694	200.027	147.155	121.87	94.6515	-1.28756	0.394532	0.773026	Plant/MCA23-20 protein (AHRD V3.11 *** tr|G7LJD0|G7LJD0_MEDTR)
Solyc01g008100	1090.37	852.478	769.532	933.986	1021.76	642.436	1317.36	1474.84	904.079	1062.69	1.17544	0.314717	0.720386	Transferring glycosyl group transferase (AHRD V3.3 *** Q8L9Q7_ARATH)
Solyc01g008190	49.6021	31.3643	41.896	51.3532	44.1499	21.8558	59.1392	49.4431	42.7729	40.9845	-1.04364	0.83681	0.955516	INO80 complex subunit D-like (AHRD V3.11 *-* tr|A0A2K3PJC0|A0A2K3PJC0_TRIPR)
Solyc01g008200	15.4636	14.8185	10.4571	5.68015	12.3776	11.6166	19.4452	8.96454	10.8012	12.5824	1.16491	0.526098	0.840102	INO80 complex subunit D-like (AHRD V3.3 *-* A0A2I4G7W4_9ROSI)
Solyc01g008220	37.3179	29.8129	38.1597	51.9541	27.6411	35.4261	64.9185	44.4844	38.5378	41.0075	1.06409	0.761939	0.933958	UPF0664 stress-induced protein C29B12.11c (AHRD V3.3 *** A0A1J3H3L4_NOCCA)
Solyc01g008250	26.087	28.0247	21.2552	20.1301	22.4571	27.3635	13.9851	25.6434	23.6493	21.6666	-1.09151	0.614035	0.879857	Thioredoxin (AHRD V3.3 *** A0A2U1L6U5_ARTAN)
Solyc01g008260	33.8219	35.1949	21.5086	43.7074	26.9028	36.5924	22.2416	39.7855	32.5246	30.5506	-1.06461	0.739976	0.924621	E2F-associated phosphoprotein (AHRD V3.11 *** tr|A0A2I4ECY9|A0A2I4ECY9_9ROSI)
Solyc01g008270	117.824	74.078	63.9456	24.0279	27.2842	66.8556	99.2124	64.7831	60.5149	58.5153	-1.03417	0.921148	0.978639	Prefoldin subunit 5 (AHRD V3.3 *** B6TVU2_MAIZE)
Solyc01g008280	28.4049	34.875	34.2081	62.8654	25.2855	29.2074	55.0166	32.4255	38.2043	33.8794	-1.12765	0.560892	0.859048	#N/A
Solyc01g008320	126.103	178.28	122.748	184.988	146.498	104.246	169.257	158.036	150.313	142.167	-1.0573	0.680237	0.904064	Shoot gravitropism 2 (SGR2) protein (AHRD V3.3 *** A0A072UJS6_MEDTR)
Solyc01g008330	87.2046	125.336	138.093	96.4881	161.802	176.401	55.8943	100.435	109.854	112.508	1.02416	0.928287	0.979557	Biotin carboxylase (AHRD V3.11 *** tr|A0A2G3AYC3|A0A2G3AYC3_CAPCH)
Solyc01g008370	127.885	109.152	121.524	95.2135	97.8723	143.094	135.609	141.982	112.733	128.145	1.1367	0.420213	0.786744	26S proteasome non-ATPase regulatory subunit 7 (AHRD V3.11 *** tr|A0A2G3AYA8|A0A2G3AYA8_CAPCH)
Solyc01g008460	60.4121	106.367	78.6101	58.1749	84.0884	175.578	67.5697	95.5047	73.6268	98.7974	1.34187	0.189955	0.602275	2Fe-2S ferredoxin (AHRD V3.3 *** A0A2G3B9S5_CAPCH)
Solyc01g008480	15.8625	5.66071	10.7661	9.02812	8.20364	7.26317	8.52592	8.65937	9.6655	8.14404	-1.18682	0.404278	0.777728	Pentatricopeptide repeat (AHRD V3.3 *** A0A200Q273_9MAGN)
Solyc01g008490	41.0574	50.7156	72.5484	25.5209	22.6814	63.4651	28.0525	10.6524	44.3113	25.6098	-1.73025	0.160375	0.570803	Nuclear transcription factor Y subunit A-7 (AHRD V3.3 *** A0A2G2XP63_CAPBA)
Solyc01g008520	72.3818	46.1347	99.4651	55.9652	121.048	116.132	34.0795	15.6407	65.6616	52.3197	-1.25501	0.565187	0.861367	Homolog of X-ray repair cross complementing 2 (XRCC2) (AHRD V3.3 *** A0A1P8BBF2_ARATH)
Solyc01g008530	180.998	150.851	219.113	97.4348	225.25	196.249	53.8197	127.927	155.382	132.082	-1.17641	0.62559	0.883504	phenylacetaldehyde reductase 1
Solyc01g008700	24.8863	32.2876	31.4791	26.1701	19.3139	20.6705	30.5377	27.9486	28.5237	24.1604	-1.1806	0.258959	0.676857	#N/A
Solyc01g008730	120.101	118.781	95.2059	107.33	160.78	127.995	104.805	55.3425	109.88	104.524	-1.05124	0.811306	0.948782	BZIP transcription factor (AHRD V3.3 *** E9N3N2_9POAL)
Solyc01g008780	23.944	28.8971	18.6485	21.2349	22.7848	20.6035	18.9116	29.9475	22.879	22.7075	-1.00755	0.965826	0.990057	Phospholipase A2 family protein (AHRD V3.3 *** AT4G29070.2)
Solyc01g008790	43.8445	3.91673	35.3294	20.8312	20.5072	19.8079	18.845	32.5895	18.8548	22.3488	1.18531	0.68695	0.907281	Non-specific phospholipase C6 (AHRD V3.3 *** A0A2G3DF85_CAPCH)
Solyc01g008810	50.7088	94.0887	67.3838	62.4529	107.67	149.305	54.7908	75.7129	66.9395	90.3674	1.34999	0.167714	0.581761	RING/U-box superfamily protein (AHRD V3.3 *** AT5G19430.6)
Solyc01g008820	290.988	282.65	341.15	340.445	153.644	151.754	182.543	158.376	312.629	161.13	-1.94022	3.32541e-06	0.00296979	signal peptide peptidase-like (AHRD V3.3 *** A0A2I4FPX2_9ROSI)
Solyc01g008840	84.7518	109.961	88.5848	124.829	80.7619	117.619	132.628	63.9074	100.755	94.7255	-1.06365	0.690769	0.909026	COP9 signalosome complex subunit 2 (AHRD V3.3 *** A0A2G2XP81_CAPBA)
Solyc01g008850	216.728	172.144	212.363	277.647	190.98	196.25	341.999	287.671	216.568	246.422	1.13785	0.358794	0.750672	Non-specific serine/threonine protein kinase (AHRD V3.11 *** tr|A0A2G2XP60|A0A2G2XP60_CAPBA)
Solyc01g008890	53.3975	56.7957	67.4041	48.5318	47.9044	63.9868	82.405	70.7337	56.1226	65.0147	1.15844	0.247635	0.666444	Solanum lycopersicum Cytokinin Response Factor 3
Solyc01g008900	11.1301	9.53971	8.78043	12.6834	5.49359	3.50934	10.7274	8.82337	10.4279	6.53586	-1.59549	0.0468698	0.352611	D-cysteine desulfhydrase 2, mitochondrial (AHRD V3.11 *** tr|A0A2G3DF42|A0A2G3DF42_CAPCH)
Solyc01g008910	19.704	22.2632	22.2647	18.6147	30.2602	28.6787	39.7667	32.988	20.6492	32.6646	1.58188	0.00370026	0.126832	Transcription factor GRAS (AHRD V3.3 *** A0A200QIE7_9MAGN)
Solyc01g008930	13.95	20.8971	14.6071	27.8455	20.1365	14.267	12.7444	17.7701	18.5564	15.971	-1.16189	0.470977	0.813724	AUREA phytochromobilin synthase
Solyc01g008990	71.1742	39.3195	53.1652	70.2541	58.3947	34.0123	54.3033	31.0166	56.8601	42.7669	-1.32953	0.151332	0.557239	THO complex subunit 7B (AHRD V3.3 *** A0A1U8H3F7_CAPAN)
Solyc01g009010	86.4401	83.7129	90.4609	110.768	55.1335	53.0409	46.0009	59.713	92.2775	53.2372	-1.73333	0.000420369	0.0478839	4-diphosphocytidyl-2-C-methyl-D-erythritol kinase
Solyc01g009020	172.651	137.846	190.525	160.387	120.803	123.873	120.755	134.503	164.218	124.86	-1.31522	0.00861603	0.178937	Cysteine proteinase inhibitor (AHRD V3.11 *** tr|A0A059TCI1|A0A059TCI1_TOBAC)
Solyc01g009030	15.3084	21.0348	7.63203	16.8353	13.0325	11.7648	9.74368	7.7503	14.2621	10.3732	-1.37489	0.303626	0.71306	dgd1 suppressor 1 Chr5:3974374-3978066 REVERSE LENGTH=602 201606 (AHRD V3.11 *** AT5G12290.4)
Solyc01g009040	82.8737	77.4406	89.8836	73.9963	70.0246	82.581	50.201	71.6814	80.8293	67.5402	-1.19676	0.177656	0.590539	#N/A
Solyc01g009050	302.713	223.076	223.871	355.188	405.358	265.401	271.592	336.855	270.698	314.975	1.16356	0.307444	0.715996	Molybdopterin biosynthesis protein CN.1
Solyc01g009070	104.258	69.7348	87.7503	114.16	72.7673	57.9164	197.367	93.5318	92.3805	93.9167	1.01663	0.941815	0.983531	gamyb-like 1
Solyc01g009100	36.7552	39.7276	29.5685	38.2023	14.0962	16.7823	24.6373	26.483	35.837	19.8211	-1.80802	0.00333496	0.119932	60S ribosomal protein L30 (AHRD V3.11 *-* tr|A0A2G2XP72|A0A2G2XP72_CAPBA)
Solyc01g009170	84.471	69.6446	84.737	143.556	97.8792	68.7358	110.604	89.4487	91.9756	90.3242	-1.01828	0.912376	0.97548	EIL-EIN3/EIL
Solyc01g009180	66.4484	61.8604	81.9222	95.1547	55.7319	45.7504	20.9671	73.2162	75.2372	44.4796	-1.6915	0.0433992	0.340342	5-methyltetrahydropteroyltriglutamate--homocysteine methyltransferase (AHRD V3.3 *** A0A2G3DF96_CAPCH)
Solyc01g009210	6.24193	15.196	18.0851	9.62479	12.6059	5.61409	7.12051	17.4295	11.3355	9.68082	-1.17092	0.695486	0.910636	Unknown protein
Solyc01g009230	48.2924	72.3494	56.6885	44.7885	48.8391	37.5279	55.708	44.5389	54.575	46.179	-1.18181	0.267034	0.68465	sitiens
Solyc01g009240	96.9333	126.906	105.667	82.7222	97.7746	109.348	18.1884	56.3719	101.831	57.5404	-1.76973	0.11151	0.495858	Glycosyl hydrolase family protein (AHRD V3.3 *** A0A2U1QCD6_ARTAN)
Solyc01g009280	84.5825	54.2986	56.0415	40.8907	30.5632	26.1843	44.6361	41.2321	56.9575	34.837	-1.63497	0.0227926	0.269213	Serine/threonine-protein phosphatase (AHRD V3.3 *** A0A2G2XPM1_CAPBA)
Solyc01g009290	38.0809	69.2461	59.7365	43.6622	28.8316	35.6516	75.3003	32.0958	51.2108	39.7007	-1.28992	0.234634	0.652703	Protein CLP1 homolog (AHRD V3.11 *** tr|A0A1U8H4I9|A0A1U8H4I9_CAPAN)
Solyc01g009300	41.3935	44.5335	45.6916	37.0392	54.2438	67.742	34.2121	64.9668	42.027	53.4588	1.27201	0.195275	0.607817	Serine/threonine-protein kinase Nek2 (AHRD V3.3 *** A0A2G2XPS8_CAPBA)
Solyc01g009310	181.679	132.724	133.158	142.444	100.188	149.27	126.684	156.979	146.24	131.322	-1.1136	0.384045	0.766823	meloidogyne-induced giant cell protein DB217
Solyc01g009340	51.4337	55.0385	35.8887	62.2006	30.6894	53.0996	67.9163	43.3378	50.1379	46.7983	-1.07136	0.692149	0.909847	Protein IQ-domain 14-like (AHRD V3.11 *** tr|A0A2K3PR21|A0A2K3PR21_TRIPR)
Solyc01g009350	13.5431	32.8436	21.9305	20.3582	26.4319	35.9929	6.25724	13.9331	21.11	16.9705	-1.24393	0.556907	0.857295	Polynucleotidyl transferase, ribonuclease H-like superfamily protein (AHRD V3.3 *** A0A2U1M9A7_ARTAN)
Solyc01g009380	144.53	224.914	176.695	190.262	209.662	197.256	141.482	145.465	181.818	170.806	-1.06448	0.598803	0.875288	Nicalin (AHRD V3.3 *** A0A1Q3D0I4_CEPFO)
Solyc01g009520	82.8416	106.058	93.6279	94.1323	63.1034	68.6838	115.798	113.315	93.8067	86.8408	-1.08021	0.581088	0.870409	Ribosomal protein (AHRD V3.3 *** Q6ER67_ORYSJ)
Solyc01g009570	32.2088	41.8217	30.3136	31.9986	52.7019	62.6053	45.8067	51.8037	33.8093	52.8971	1.56457	0.00469223	0.137398	#N/A
Solyc01g009620	186.284	158.778	271.005	209.011	260.997	221.457	201.786	197.2	202.315	218.993	1.08244	0.507992	0.831435	Cleavage and polyadenylation specificity factor subunit 5 (AHRD V3.3 *** A0A2G2XQG1_CAPBA)
Solyc01g009770	37.399	42.5547	29.6057	32.6655	44.9508	40.3602	31.1902	33.1141	35.2223	36.9982	1.05042	0.72792	0.919234	ATP-dependent RNA helicase (AHRD V3.3 *** Q5HZ54_ARATH)
Solyc01g009780	16.1677	26.1934	20.0398	19.8251	15.9937	22.4312	18.5117	26.4618	20.2529	20.4747	1.01095	0.945378	0.984762	GSH-induced LITAF domain protein (AHRD V3.3 *** GILP_ARATH)
Solyc01g009920	13.1812	6.43297	7.91962	15.0462	18.7318	30.9377	8.87166	18.2022	10.0259	17.4904	1.74451	0.0718265	0.418799	Histidine kinase-, DNA gyrase B-, and HSP90-like ATPase family protein (AHRD V3.3 *** A0A1P8BEQ3_ARATH)
Solyc01g009990	294.607	343.733	234.298	261.825	352.424	323.59	268.546	321.429	280.744	314.986	1.12197	0.297565	0.70721	Peptidyl-prolyl cis-trans isomerase (AHRD V3.3 *** A0A2G3DGA1_CAPCH)
Solyc01g010000	20.1676	22.1794	23.4508	25.6124	30.4205	29.2653	29.055	24.8941	22.7668	28.3276	1.24425	0.134039	0.53149	ACT domain-containing protein (AHRD V3.3 *** A0A1Q3BTU5_CEPFO)
Solyc01g010030	16.5593	20.3431	10.0377	14.3896	8.39248	14.6997	19.0083	11.0415	14.852	12.685	-1.17083	0.617889	0.881683	Proline-rich receptor-like protein kinase PERK13 (AHRD V3.3 *-* A0A2G3AJ74_CAPAN)
Solyc01g010060	20.0841	6.94953	9.89814	9.91537	14.804	30.1685	8.76925	9.01453	10.8185	13.7075	1.26704	0.504319	0.830252	Unknown protein
Solyc01g010080	3.52769	4.3587	2.71272	12.3288	3.28391	4.34052	4.96323	4.52887	4.76204	4.23079	-1.12557	0.747807	0.928703	Potassium channel AK.1
Solyc01g010100	6.14073	7.67499	12.1948	8.37005	10.0002	5.91123	12.6376	12.9839	8.32819	9.92405	1.19162	0.446188	0.801603	#N/A
Solyc01g010110	6.98228	18.845	15.4177	10.9598	7.3992	4.09919	13.102	13.6608	12.2111	8.58369	-1.42259	0.259094	0.676857	#N/A
Solyc01g010130	135.517	164.036	114.782	130.529	147.597	213.068	148.591	167.773	135.092	167.331	1.23865	0.0949599	0.46458	bHLH transcription factor 001
Solyc01g010220	10.0063	9.9366	11.6136	21.3103	7.41829	9.64544	13.5007	15.959	12.5247	11.1429	-1.12401	0.61474	0.879899	#N/A
Solyc01g010240	5.66166	4.58853	11.9943	2.927	4.62736	11.7823	4.40955	11.7918	5.49545	7.29683	1.32779	0.507076	0.831435	CRABS CLAW a
Solyc01g010250	29.7322	40.7792	48.0445	42.3147	51.3037	50.2107	55.8982	58.233	39.6233	53.8119	1.35809	0.0345114	0.317073	6-phosphogluconolactonase (AHRD V3.3 *** B6U0H2_MAIZE)
Solyc01g010270	8.80119	8.86096	7.58333	14.3907	6.61191	8.31046	13.0957	13.8442	9.60487	9.99051	1.04015	0.83851	0.955609	Protein SPIRA.1
Solyc01g010290	14.5	16.0768	21.6297	6.28573	15.5539	19.7595	21.9771	30.2361	13.3427	21.2583	1.59326	0.0771459	0.430935	Ureide permease (AHRD V3.3 *** A0A2R6PBP7_ACTCH)
Solyc01g010310	638.215	793.123	750.496	575.838	925.283	988.918	642.64	617.783	683.895	776.354	1.1352	0.294774	0.703898	Carbohydrate-binding X8 domain superfamily protein (AHRD V3.3 *** A0A1P8AZV6_ARATH)
Solyc01g010370	102.11	98.1821	85.9363	117.879	138.366	87.4394	76.0606	103.137	100.387	98.7023	-1.01707	0.892929	0.969108	S-adenosyl-L-methionine-dependent methyltransferases superfamily protein (AHRD V3.3 *** A0A2U1P6Q5_ARTAN)
Solyc01g010390	1618.44	200.524	120.867	204.858	296.552	234.017	3323.09	517.642	299.402	587.8	1.96325	0.293605	0.703418	Beta-glucosidase 34 (AHRD V3.3 *** A0A2G3DFM9_CAPCH)
Solyc01g010410	8.54397	7.02563	6.21521	6.72477	13.7677	12.2133	12.8591	10.1546	7.07733	12.1728	1.71997	0.000845697	0.0649926	Zinc finger protein (AHRD V3.3 *** A0A200PRD7_9MAGN)
Solyc01g010430	16.1555	8.1406	10.0843	6.98228	6.60555	8.50926	11.1835	23.1468	9.80968	10.9829	1.1196	0.688465	0.908186	Actin cross-linking protein, putative (DUF569) (AHRD V3.3 *** Q8GXC9_ARATH)
Solyc01g010460	69.1171	59.6407	96.1523	80.4785	94.0864	96.7091	77.5227	42.0608	75.1523	73.8032	-1.01828	0.926004	0.979221	#N/A
Solyc01g010530	57.1641	45.71	50.435	75.7885	121.468	106.364	175.256	118.259	56.217	127.921	2.27548	0.000139207	0.0269795	Sugar transporter protein 5
Solyc01g010540	17.2716	15.3948	10.2575	14.8658	11.0791	13.983	11.5878	18.5908	14.1901	13.5161	-1.04987	0.758249	0.933085	40S ribosomal protein S9 (AHRD V3.3 *** A0A1U8EPE0_CAPAN)
Solyc01g010570	17.6584	12.8763	10.5071	9.38711	10.3485	8.95351	11.6152	16.949	12.2374	11.6214	-1.053	0.780122	0.938593	Mucin-related protein (AHRD V3.11 *** tr|A0A2U1LU51|A0A2U1LU51_ARTAN)
Solyc01g010580	10.5609	8.46896	10.2937	10.847	7.24991	10.7923	11.2846	7.70381	9.99663	9.08153	-1.10076	0.527642	0.840942	40S ribosomal protein S9 (AHRD V3.3 *** A0A1U8EPE0_CAPAN)
Solyc01g010650	215.622	186.298	226.674	239.549	62.0836	87.6043	107.123	103.798	216.11	88.1849	-2.45064	8.19594e-06	0.00420116	UDP-galactose UDP-glucose transporter 3-like protein (AHRD V3.3 *** A0A2K3NS07_TRIPR)
Solyc01g010660	26.9323	26.2041	20.2949	20.7559	20.019	28.2991	24.692	23.159	23.3503	23.8574	1.02172	0.89125	0.968541	Protein kinase 2B, chloroplastic (AHRD V3.3 *** A0A2G3AIH7_CAPAN)
Solyc01g010700	24.3584	30.6438	18.0093	41.038	32.7228	30.6995	30.8398	16.2188	27.2533	26.6243	-1.02362	0.913632	0.97548	SNF1-related protein kinase regulatory subunit gamma-1-like (AHRD V3.3 *** A0A2G3DFN0_CAPCH)
Solyc01g010710	5.52571	22.7886	11.2663	10.9598	11.0335	9.15957	6.37642	7.74159	11.1666	8.40425	-1.32869	0.336641	0.734834	Carboxypeptidase (AHRD V3.11 *** tr|A0A2I4FWA2|A0A2I4FWA2_9ROSI)
Solyc01g010830	107.25	113.126	96.3311	47.693	69.9012	95.1133	38.6509	100.262	86.4064	71.2451	-1.2128	0.407297	0.779811	Haloacid dehalogenase-like hydrolase-like protein (AHRD V3.3 *** Q6Z026_ORYSJ),Pfam:PF13419
Solyc01g010860	140.751	182.76	159.548	126.693	196.903	232.86	189.845	206.227	151.006	205.837	1.3631	0.00752414	0.167395	Sphinganine C(4)-monooxygenase.1
Solyc01g010870	31.0953	90.9187	59.5478	51.5691	29.1656	31.7812	65.6596	53.0933	54.2813	42.3979	-1.28028	0.310703	0.718747	S-adenosyl-L-methionine-dependent methyltransferases superfamily protein (AHRD V3.3 *** A0A2U1LK68_ARTAN)
Solyc01g010880	13.5592	14.8247	10.8221	11.5989	14.6621	15.2824	23.7367	12.6366	12.6034	16.1013	1.27753	0.20937	0.622353	RING/FYVE/PHD zinc finger superfamily protein (AHRD V3.3 *** A0A2U1NXA0_ARTAN)
Solyc01g010930	47.0345	49.0005	38.0348	34.6264	39.1732	63.7642	38.8221	55.8639	41.7399	48.2441	1.15583	0.417159	0.784312	O-fucosyltransferase family protein (AHRD V3.11 *** tr|A0A2U1NIF6|A0A2U1NIF6_ARTAN)
Solyc01g010950	27.5812	39.8003	29.9325	14.0922	46.2322	40.0648	8.65212	20.9214	26.0859	24.0633	-1.08405	0.848779	0.95851	MAP kinase kinase kinase 2
Solyc01g010970	25.4484	27.0008	31.581	21.3068	23.6779	36.8037	24.9983	18.9023	26.0762	25.3317	-1.02939	0.86006	0.961434	Argonaute7
Solyc01g011000	139.264	139.549	169.276	135.412	96.6274	70.8343	139.825	122.568	145.279	104.07	-1.39597	0.0276722	0.28841	Eukaryotic translation initiation factor 5A (AHRD V3.3 *** A0A1U8HES8_CAPAN)
Solyc01g011040	93.7877	147.16	120.857	63.3375	78.8211	87.4157	152.828	103.206	101.384	102.102	1.00709	0.970882	0.991395	Leucine-rich repeat receptor-like protein kinase (AHRD V3.3 *** A0A2R6RFK8_ACTCH)
Solyc01g011060	570.641	554.069	429.548	474.997	691.757	707.118	382.825	530.86	503.973	561.509	1.11416	0.433609	0.79374	Maturase (AHRD V3.3 *-* O79414_SOLTU)
Solyc01g011090	14.4375	11.3592	10.1796	9.27166	10.2218	9.77656	11.7915	12.242	11.154	10.9593	-1.01776	0.894829	0.969462	Phospholipid-transporting ATPase (AHRD V3.3 *-* A0A1U8GCQ9_CAPAN)
Solyc01g011100	160.632	164.298	156.965	99.1318	150.632	96.1318	51.9656	142.715	142.354	101.799	-1.39839	0.139137	0.542174	Phospholipid-transporting ATPase (AHRD V3.3 *** A0A1U8GCQ9_CAPAN)
Solyc01g011220	18.845	19.2678	11.9928	14.0505	16.0863	15.48	28.0938	31.3722	15.7275	21.6444	1.37621	0.141038	0.544012	Aspartic proteinase-like protein 2 (AHRD V3.3 *-* A0A1J6IK01_NICAT)
Solyc01g011350	255.673	243.314	162.327	255.526	236.459	215.797	192.749	224.487	225.382	216.769	-1.03974	0.750536	0.930102	DUF3755 domain-containing protein (AHRD V3.3 *** A0A1Q3D9X4_CEPFO)
Solyc01g011410	758.982	741.56	583.641	356.053	585.52	581.743	481.672	712.409	584.803	584.707	-1.00016	0.999134	0.999488	#N/A
Solyc01g014060	8.48968	6.50598	5.93918	16.6349	10.5036	5.22245	5.05384	6.63577	8.59483	6.5491	-1.31237	0.327091	0.727902	Plastocyanin-like (AHRD V3.3 *-* A0A200Q508_9MAGN)
Solyc01g014140	3.61154	3.69082	3.06744	8.84997	8.84997	7.8628	18.845	14.8984	4.36147	11.8226	2.71069	0.0270284	0.286465	receptor-like protein 12 (AHRD V3.3 *-* A0A2G2YW48_CAPAN)
Solyc01g014230	35.4671	26.704	35.0938	25.8941	24.285	17.991	28.901	23.3299	30.4585	23.2973	-1.30738	0.289328	0.699885	#N/A
Solyc01g014270	8.77092	10.7478	9.20493	11.733	12.7057	10.8193	7.23303	10.3037	10.045	10.0607	1.00156	0.99275	0.99698	Unknown protein
Solyc01g014290	11.9549	12.3911	5.78396	5.64251	6.80968	12.8349	19.8403	4.90684	8.33851	9.60434	1.1518	0.716617	0.917053	#N/A
Solyc01g014380	11.3213	20.1168	13.5938	15.757	9.77491	12.8349	19.8103	13.5154	14.8617	13.538	-1.09777	0.635128	0.885376	#N/A
Solyc01g014570	3.61154	11.602	23.7253	2.2939	12.2062	10.1385	6.75775	4.70237	6.91039	7.91896	1.14595	0.798196	0.944283	#N/A
Solyc01g014620	29.404	22.5681	28.0627	26.3857	22.6322	24.0443	20.3349	24.7373	26.4759	22.8735	-1.15749	0.248422	0.667331	Unknown protein
Solyc01g014950	14.8984	26.1843	65.2151	16.3807	23.7253	48.1331	5.38033	54.7986	25.4077	24.0884	-1.05477	0.925743	0.979221	#N/A
Solyc01g014960	8.09702	11.2623	16.3227	9.84856	14.1642	9.04846	5.3589	14.2696	11.0035	9.94979	-1.1059	0.716017	0.916727	transcription factor bHLH95-like (AHRD V3.3 *** A0A2I4EEI6_9ROSI)
Solyc01g016350	58.2151	121.048	66.0484	61.8818	31.6849	36.155	40.0609	48.1331	73.258	38.5519	-1.90024	0.0036595	0.125818	Unknown protein
Solyc01g016450	9.42694	11.9901	28.2881	6.2741	14.2398	9.46624	18.7882	10.759	11.9011	12.848	1.07956	0.820735	0.951571	E3 ubiquitin-protein ligase AIP2 (AHRD V3.3 *-* XP_004228345.1)
Solyc01g016560	26.1843	3.69082	17.9217	2.52423	3.06744	30.6995	15.9264	9.94925	8.13145	11.0523	1.35921	0.6058	0.877905	#N/A
Solyc01g016720	29.8372	31.3909	27.0925	33.1726	29.2968	23.5876	23.9403	28.3493	30.2899	26.1694	-1.15745	0.341115	0.739951	Unknown protein
Solyc01g016790	82.222	50.852	87.0428	43.889	76.3218	23.9232	49.1162	75.25	63.2188	50.9683	-1.24036	0.446955	0.801667	Unknown protein
Solyc01g017050	158.418	77.1905	188.806	134.647	103.434	90.5416	144.715	124.769	132.784	114.034	-1.16443	0.371083	0.758296	Carotenoid cleavage dioxygenase.1
Solyc01g017140	43.1272	26.1363	87.9046	144.456	60.0066	88.1345	70.091	37.2767	61.5086	60.9693	-1.00885	0.977764	0.993634	Protein Ycf2 (AHRD V3.3 *-* A0A0F7BHY0_9SOLA)
Solyc01g017200	19.9441	22.0204	19.6713	20.3751	11.7554	11.5228	19.3933	18.7771	20.483	14.9029	-1.37444	0.134107	0.531523	#N/A
Solyc01g017300	26.554	27.8732	38.5526	10.0721	51.9165	28.3163	19.6862	22.3406	23.1538	28.3563	1.22469	0.527785	0.840958	Photosystem I P700 chlorophyll a apoprotein .1
Solyc01g017320	177.423	232.063	144.204	128.504	191.979	162.632	232.535	271.229	166.199	210.655	1.26749	0.188126	0.600465	Photosystem I P700 chlorophyll a apoprotein .1
Solyc01g017440	151.778	110.707	168.8	72.0485	94.7184	68.1365	113.894	108.101	119.563	94.414	-1.26637	0.252409	0.671081	DNA-directed RNA polymerase subunit alpha (AHRD V3.3 *** A0A1U8QD90_CAPAN)
Solyc01g017600	82.5324	103.232	73.808	55.084	33.0171	83.8456	56.4209	83.9203	76.7171	60.1702	-1.275	0.235484	0.653372	transmembrane protein 45B-like (AHRD V3.11 *** tr|A0A2I4DQK0|A0A2I4DQK0_9ROSI)
Solyc01g017640	13.7335	16.3807	3.23464	9.94925	2.87251	4.40955	4.84012	4.13906	9.22428	3.9912	-2.31115	0.0345162	0.317073	Unknown protein
Solyc01g017730	11.0611	11.7603	16.6327	16.7454	19.7074	16.9403	35.8485	10.2518	13.7965	18.7157	1.35655	0.26024	0.677924	#N/A
Solyc01g017740	19.363	4.40955	32.1846	12.3353	5.71618	26.1843	38.6489	66.1318	13.5688	24.8699	1.83287	0.313073	0.720075	Cytochrome b6 (AHRD V3.11 *-* tr|A0A1U8QCH4|A0A1U8QCH4_CAPAN)
Solyc01g017760	17.5216	62.4412	23.7142	33.5685	56.7006	45.8847	63.7533	34.7462	30.5489	48.9966	1.60387	0.0718778	0.418799	#N/A
Solyc01g017790	6.42239	4.90021	50.7495	8.02625	7.80947	7.89958	12.8142	30.1159	10.6405	12.4216	1.16739	0.762917	0.934235	ARID/BRIGHT DNA-binding domain-containing protein (AHRD V3.3 *-* F4I2F0_ARATH)
Solyc01g018070	24.1069	16.5309	72.0208	56.4403	63.6199	23.815	42.9741	35.5165	35.6756	38.996	1.09307	0.768223	0.935678	ARID/BRIGHT DNA-binding domain (AHRD V3.3 *-* A0A200PS47_9MAGN)
Solyc01g020240	60.4377	53.8031	44.0889	72.6007	54.4869	55.5696	41.6591	62.4834	56.7997	52.9848	-1.072	0.667295	0.900457	#N/A
Solyc01g020320	22.9129	16.1503	15.0064	30.5702	12.5614	17.7123	22.3143	21.3177	20.2982	18.0368	-1.12538	0.541041	0.849056	hypothetical protein (AHRD V3.3 *** AT2G20480.1)
Solyc01g020440	47.2839	51.1603	68.0042	36.3217	42.6893	18.977	47.8474	44.5512	49.441	36.2507	-1.36386	0.272082	0.687304	Replication factor C subunit 3 (AHRD V3.3 *** A0A1U8E9Y1_CAPAN)
Solyc01g020520	16.8517	24.3041	13.4328	54.382	67.5484	55.7152	97.2151	26.3282	23.3876	55.7104	2.38205	0.0159835	0.230136	Membrane-bound transcription factor site-2 protease (AHRD V3.3 *** A0A200QAL7_9MAGN)
Solyc01g021640	15.2484	15.0078	16.8846	33.7883	24.0986	14.1847	15.0387	17.903	19.0086	17.4176	-1.09134	0.711181	0.915435	Transducin/WD40 repeat-like superfamily protein (AHRD V3.3 *** AT5G17370.1)
Solyc01g021730	36.4969	76.4795	59.2992	37.4969	78.1277	105.807	10.048	39.0458	49.9127	42.4369	-1.17616	0.743439	0.926382	NAC domain-containing protein (AHRD V3.3 *-* A0A2U1NIJ0_ARTAN)
Solyc01g022740	30.5537	39.741	30.0518	36.0065	33.8565	39.5287	34.851	37.399	33.8562	36.3419	1.07342	0.589275	0.872474	F-box/kelch-repeat protein (AHRD V3.3 *** A0A2G3DG30_CAPCH)
Solyc01g022780	148.048	21.5594	163.382	107.965	155.215	200.132	117.048	120.048	86.6227	144.542	1.66863	0.167121	0.580958	fibril-forming collagen alpha chain-like (AHRD V3.3 *-* XP_022866881.1)
Solyc01g022790	3.44579	2.66717	3.23464	2.52423	5.71618	3.10875	4.04459	27.1577	2.94323	6.64683	2.25835	0.112274	0.498015	#N/A
Solyc01g028860	287.554	209.68	197.944	293.575	206.642	175.827	276.876	243.556	243.296	222.483	-1.09355	0.5017	0.828635	Evolutionarily conserved C-terminal region 2 (AHRD V3.3 *** F4JDC2_ARATH)
Solyc01g028930	17.4923	22.2767	17.8277	9.17134	21.316	15.4659	11.9777	19.3611	15.8875	16.6282	1.04662	0.824676	0.952729	TATA-box-binding protein (AHRD V3.3 *** A0A1U8HIY4_CAPAN)
Solyc01g034040	4.13906	2.40433	6.80968	8.84997	5.22531	20.7479	28.0525	28.4692	4.9487	17.1537	3.46631	0.0146897	0.222356	Non-functional NADPH-dependent codeinone reductase 2 (AHRD V3.11 *-* tr|A0A2G2X821|A0A2G2X821_CAPBA)
Solyc01g034150	21.3234	31.7828	16.4689	34.1392	51.1828	34.7785	9.95484	30.8763	24.8451	27.1972	1.09467	0.778547	0.938119	DNA polymerase eta (AHRD V3.11 *** tr|A0A2G3AIQ2|A0A2G3AIQ2_CAPAN)
Solyc01g044270	59.0439	55.6952	55.4794	71.77	46.8445	47.1324	78.6464	62.0692	60.1543	57.2972	-1.04987	0.71084	0.915435	DnaJ domain (AHRD V3.3 *** A0A200QGM0_9MAGN)
Solyc01g044340	54.9309	63.432	64.6102	73.9016	92.5442	78.7151	117.048	77.8818	63.866	90.2718	1.41346	0.0170356	0.236008	RBR-type E3 ubiquitin transferase (AHRD V3.3 *-* A0A2G3AIF0_CAPAN)
Solyc01g044360	106.57	110.308	112.071	75.3933	131.548	79.6436	145.64	101.282	99.8313	111.497	1.11685	0.505785	0.830976	#N/A
Solyc01g044480	104.632	41.727	55.4652	90.8216	61.6717	61.9662	62.6371	54.7986	68.4814	60.1811	-1.13792	0.459882	0.809188	#N/A
Solyc01g044490	115.419	110.165	118.693	107.13	102.899	97.0767	143.843	137.937	112.762	118.652	1.05223	0.665522	0.900354	Elongation factor P (AHRD V3.11 *** tr|B6TVD2|B6TVD2_MAIZE)
Solyc01g049680	81.7151	76.1962	53.1321	79.2283	92.1522	67.7151	66.8868	85.5692	71.5514	77.3058	1.08042	0.624085	0.882816	Transcription factor Pur-alpha.1
Solyc01g049700	26.1843	27.075	33.0893	30.2	31.6849	49.0493	10.7274	58.0485	29.0119	31.3648	1.0811	0.821972	0.951955	#N/A
Solyc01g049930	130.864	91.0071	83.0067	97.6983	109.157	100.144	124.657	82.6511	99.1344	103.017	1.03917	0.771746	0.936067	#N/A
Solyc01g049960	51.7449	49.8871	47.8815	46.8844	46.5399	33.6665	26.8895	42.3297	49.064	36.5437	-1.34261	0.0674133	0.408159	chromosome-associated kinesin (AHRD V3.3 *** AT4G26410.1)
Solyc01g050070	35.4452	44.9351	55.3018	43.3973	95.0413	33.5003	57.1736	17.3099	44.2167	42.1321	-1.04948	0.888854	0.968184	Transmembrane protein (AHRD V3.11 *** tr|A0A1P8AMQ6|A0A1P8AMQ6_ARATH)
Solyc01g056320	22.0955	40.1217	20.8421	18.6782	28.398	15.4385	17.7517	43.6488	24.2376	24.1422	-1.00395	0.990372	0.996667	Unknown protein
Solyc01g056340	158.295	177.313	88.1164	150.772	103.874	99.1104	118.763	108.671	138.962	107.363	-1.29432	0.086279	0.448166	de-etiolated 1
Solyc01g056350	55.0191	46.9827	54.9469	78.8284	65.534	70.3745	77.8508	48.4395	57.8454	64.5783	1.11639	0.429932	0.792036	#N/A
Solyc01g056360	9.02442	8.1831	17.5457	15.1488	17.1665	8.66344	13.2412	10.048	11.8364	11.8603	1.00201	0.992313	0.99698	#N/A
Solyc01g056390	82.2422	103.376	105.352	104.965	70.7984	70.7151	107.197	101.675	98.4693	85.9474	-1.14569	0.275356	0.691578	nodulin/glutamine synthase-like protein (AHRD V3.3 *-* AT3G53180.1)
Solyc01g056520	161.066	149.748	123.348	178.204	133.236	120.812	250.575	135.542	151.741	152.91	1.0077	0.96203	0.988933	ARM repeat superfamily protein (AHRD V3.3 *** AT5G06120.9)
Solyc01g056530	5.63457	6.42073	6.54834	5.05782	13.0187	28.3025	4.40955	6.24193	5.88349	10.0352	1.70566	0.124379	0.517771	Oligopeptide transporter (AHRD V3.3 *-* A0A200RAW0_9MAGN)
Solyc01g056570	63.0876	54.2387	36.7244	64.8719	71.9381	37.987	63.1257	50.5271	53.4338	54.3352	1.01687	0.926629	0.979221	Regulator of chromosome condensation (AHRD V3.3 *** A0A200PRS6_9MAGN)
Solyc01g056580	3.44579	2.20051	2.88806	2.52423	4.40955	2.79911	3.24789	7.05446	2.7267	4.10081	1.50395	0.285742	0.699134	L-aspartate oxidase (AHRD V3.3 *-* A0A2G3CUJ1_CAPCH)
Solyc01g056710	581.215	539.215	528.84	637.257	505.632	403.548	585.298	542.715	570.078	504.568	-1.12983	0.294902	0.703898	#N/A
Solyc01g056720	65.2705	40.7148	51.8129	63.7443	44.5464	27.2254	61.2168	66.2863	54.4298	47.0999	-1.15562	0.454739	0.806051	small basic intrinsic protein 2.1
Solyc01g056730	17.6948	24.8666	22.7416	13.339	8.3664	23.5601	9.3549	26.8838	19.114	14.9215	-1.28097	0.414965	0.783095	Unknown protein
Solyc01g056760	16.4149	19.8615	20.1984	12.6667	14.6666	10.0586	5.06286	12.4238	16.9945	9.81476	-1.73152	0.0321685	0.304219	Zinc finger, CCHC-type (AHRD V3.3 *-* A0A2U1MSA1_ARTAN)
Solyc01g056770	52.1211	23.7269	32.498	31.7679	61.5508	28.5504	50.2612	55.7076	33.6144	47.0975	1.40111	0.150619	0.557239	Unknown protein
Solyc01g056810	30.2622	40.8004	22.4769	25.9648	15.7937	58.2811	45.1552	32.7388	29.1355	34.1543	1.17226	0.514889	0.833851	Syntaxin (AHRD V3.3 *** A0F0A7_NICBE)
Solyc01g056830	36.4032	32.5649	51.0369	24.953	44.6517	45.5649	51.5667	31.0358	35.0529	42.4791	1.21186	0.313691	0.720135	Syntaxin (AHRD V3.3 *-* A0F0A7_NICBE)
Solyc01g056840	11.6279	11.0477	13.9341	12.5155	12.5673	9.43235	14.6949	14.7432	12.2342	12.6592	1.03474	0.811512	0.948924	DNA-directed RNA polymerase subunit beta'' (AHRD V3.3 *-* A0A2L1ZQP9_9LAMI)
Solyc01g056850	187.384	122.119	183.352	137.715	143.735	197.85	170.097	198.439	155.04	176.017	1.1353	0.325457	0.727374	CTP synthase (AHRD V3.3 *** A0A2G2XFG8_CAPBA)
Solyc01g057000	7.05432	7.22008	6.713	7.16472	9.27717	14.3138	7.8161	8.099	7.03523	9.5752	1.36104	0.0917061	0.460258	Universal stress protein
Solyc01g057020	139.376	135.131	100.424	156.252	136.33	115.495	119.243	162.344	131.115	132.131	1.00775	0.944668	0.984373	protein TRIGALACTOSYLDIACYLGLYCEROL 4, chloroplastic-like (AHRD V3.3 *-* A0A2I4DQN1_9ROSI)
Solyc01g057090	45.8997	22.073	30.9832	32.3351	33.6307	34.2619	19.4642	34.6669	31.7408	29.6944	-1.06892	0.771688	0.936067	#N/A
Solyc01g057200	12.1822	4.01256	17.0429	13.9515	5.96513	2.87276	13.1468	4.52722	10.3831	5.65122	-1.83732	0.233832	0.652382	Pentatricopeptide repeat-containing protein (AHRD V3.3 *** A0A2U1QJ39_ARTAN)
Solyc01g057240	4.19183	6.46718	11.3699	6.25531	9.22832	6.87895	16.6231	9.80606	6.62645	10.0859	1.52206	0.114167	0.501738	#N/A
Solyc01g057270	154.785	393.215	283.548	169.984	301.298	360.234	26.1366	177.191	232.728	149.733	-1.55429	0.420291	0.786744	Calmodulin-binding transcription factor SR4 (AHRD V3.3 *** H8ZRY5_SOLLC)
Solyc01g057310	33.1693	51.1016	23.8324	51.1791	40.1094	18.4558	36.6041	34.829	37.9191	31.1683	-1.21659	0.426605	0.790837	Phragmoplast orienting kinesin 2 (AHRD V3.11 *** tr|A0A2G2XPE0|A0A2G2XPE0_CAPBA)
Solyc01g057320	51.8026	37.0349	47.9604	21.1669	37.0283	29.3229	32.0461	39.4416	37.3573	34.2269	-1.09146	0.684458	0.905093	Kinesin (AHRD V3.3 *-* A0A200QSU4_9MAGN)
Solyc01g057340	24.1374	51.5073	20.0559	23.9748	36.3217	29.5339	37.155	16.9298	27.8061	28.6609	1.03074	0.926947	0.979221	Unknown protein
Solyc01g057370	12.2434	14.5417	16.0098	22.5446	13.0485	19.1712	18.7516	16.2188	15.9216	16.608	1.04311	0.818641	0.951145	#N/A
Solyc01g057450	26.1843	6.98228	45.6347	6.24193	82.4651	36.155	7.55691	83.5484	15.1065	37.0408	2.45198	0.1388	0.541796	#N/A
Solyc01g057520	37.3337	30.2408	52.0477	29.5634	45.5883	23.3139	26.6453	41.1197	36.3047	32.8499	-1.10517	0.586497	0.871928	ARM repeat superfamily protein (AHRD V3.11 *** tr|F4J550|F4J550_ARATH)
Solyc01g057530	40.3446	10.6946	50.8244	43.9447	30.5748	36.7717	23.8399	33.4917	31.3316	30.7808	-1.01789	0.958922	0.988055	COBRA-like protein.1
Solyc01g057760	182.882	89.1734	98.6318	78.9651	99.4651	54.7153	31.0184	64.6318	106.161	57.4727	-1.84715	0.0535288	0.371029	RNA helicase DEAD2
Solyc01g057770	110.989	141.875	113.418	110.905	126.709	79.5214	126.564	73.3914	118.633	98.3584	-1.20613	0.206911	0.619762	HCO3-transporter family (AHRD V3.3 *** A0A2U1KUW6_ARTAN)
Solyc01g057830	343.715	386.382	340.863	328.666	304.382	210.704	194.231	259.299	349.251	238.398	-1.46499	0.0029597	0.117947	30S ribosomal protein .1
Solyc01g057840	14.8546	18.8947	14.2786	13.2842	10.3018	10.2105	14.6731	17.2271	15.1899	12.7695	-1.18955	0.369733	0.757262	Nuclear export mediator factor Nemf (AHRD V3.3 *** A0A1J3J1R1_NOCCA)
Solyc01g057900	49.3286	54.6961	29.6372	38.5306	36.6927	43.4342	46.4748	39.3997	41.8962	41.3315	-1.01366	0.937926	0.983357	E3 ubiquitin-protein ligase UPL6 (AHRD V3.3 *** A0A2G3DDX0_CAPCH)
Solyc01g057960	273.488	260.761	186.627	272.633	213.175	209.049	305.908	245.215	245.433	240.453	-1.02071	0.855065	0.959358	Homeobox leucine-zipper protein (AHRD V3.3 *-* Q8H963_ZINVI)
Solyc01g057970	23.3981	27.075	20.0559	3.06744	6.24193	36.155	28.0525	48.9664	14.0505	23.5961	1.67937	0.444152	0.801039	#N/A
Solyc01g057980	74.6458	62.6964	111.084	104.586	33.0707	67.4764	78.7647	88.2578	85.8703	62.7581	-1.36827	0.13386	0.531152	#N/A
Solyc01g058010	15.5747	12.6057	10.6524	22.1019	12.4716	6.75841	16.9966	18.1592	14.6628	12.7001	-1.15454	0.535228	0.845157	Neutral/alkaline invertase (AHRD V3.3 *** G5DC09_MANES)
Solyc01g058020	7.8649	8.91965	9.08719	5.38552	15.5071	8.28944	12.4064	6.13608	7.65464	9.94599	1.29934	0.2317	0.650325	Neutral/alkaline invertase (AHRD V3.3 *-* H6V7I6_MANES)
Solyc01g058160	22.1221	29.9937	18.6194	33.25	28.3095	38.2999	22.1221	14.5549	25.3165	24.3076	-1.04151	0.852062	0.958981	Duf724 domain-containing protein 3 (AHRD V3.3 *** A0A314KQ04_NICAT)
Solyc01g058170	14.4357	9.34178	7.02599	15.6469	12.003	20.0466	22.8199	14.8273	11.0344	16.8918	1.53083	0.131841	0.529762	Agenet domain containing protein (AHRD V3.3 *** A0A2P5F5R4_TREOI)
Solyc01g058260	85.1654	104.704	97.0229	107.194	77.2087	129.568	49.614	86.288	98.1334	80.8966	-1.21307	0.281861	0.696287	Nuclear poly(A) polymerase 3 (AHRD V3.3 *** A0A2G3B5G8_CAPCH)
Solyc01g058270	10.5636	17.3411	11.6492	23.4013	20.1129	15.2604	23.1434	17.5763	14.9488	18.7974	1.25746	0.318805	0.723283	O-acetyltransferase family protein (AHRD V3.3 *** A0A2U1M4H7_ARTAN)
Solyc01g058280	48.76	62.3017	58.7042	38.7184	32.114	41.4845	45.1557	61.09	51.2611	43.784	-1.17077	0.325263	0.727342	ER membrane protein complex subunit 6-like (AHRD V3.3 *** A0A2I4GTM2_9ROSI)
Solyc01g058350	11.4366	10.7274	14.1716	3.60315	18.9863	10.1385	5.33429	7.05446	8.89659	9.22547	1.03697	0.923501	0.979221	Unknown protein
Solyc01g058390	252.477	275.604	208.858	261.825	225.534	213.685	223.776	211.757	248.366	218.605	-1.13614	0.119944	0.511964	Galactokinase (AHRD V3.3 *** A0A2G3AJ57_CAPAN)
Solyc01g058470	73.7506	63.5484	42.3881	81.4128	57.2121	52.2988	73.4651	44.1438	63.4164	55.8127	-1.13624	0.440097	0.797009	Unknown protein
Solyc01g058530	19.363	13.0187	14.0474	27.075	5.22531	3.76674	17.4393	7.05446	17.5965	7.01484	-2.50847	0.0230743	0.270863	Ribosomal protein S18 (AHRD V3.3 *-* A0A2Z5UCK0_CUSJA)
Solyc01g058720	22.7198	12.3963	12.2955	17.222	20.9047	17.1711	37.0724	23.212	15.6272	23.575	1.50858	0.0572661	0.382413	Calcium-binding EF-hand (AHRD V3.3 *** A0A2U1NQC6_ARTAN)
Solyc01g058730	201.039	185.859	180.016	141.579	109.987	145.109	137.01	143.143	175.668	133.011	-1.3207	0.017696	0.240721	Transmembrane protein (AHRD V3.3 *** F4JLQ2_ARATH)
Solyc01g059830	70.2909	64.1363	103.335	50.4698	70.4483	96.4338	76.352	96.7497	69.6338	84.1671	1.20871	0.314114	0.720135	Enoyl-CoA hydratase (AHRD V3.3 *** A0A1Y1IHV1_KLENI)
Solyc01g059870	66.8818	109.965	94.2984	8.84997	99.4651	137.465	80.5484	122.632	49.774	107.803	2.16585	0.094428	0.464191	phytochrome B1
Solyc01g059920	22.7011	22.9581	22.9752	25.2781	9.95023	14.9486	19.2245	20.6057	23.4556	15.5801	-1.50549	0.0641443	0.398799	Nucleic acid-binding, OB-fold (AHRD V3.11 *** tr|A0A2U1P485|A0A2U1P485_ARTAN)
Solyc01g059940	34.0793	13.5144	9.16879	11.7329	9.35685	6.01304	41.6067	18.7252	14.9194	14.4695	-1.03109	0.939273	0.983531	Plant invertase/pectin methylesterase inhibitor superfamily protein (AHRD V3.3 *-* F4JC28_ARATH)
Solyc01g059980	60.9507	62.3789	56.2323	55.7475	64.655	61.5249	107.223	82.195	58.7566	76.9478	1.3096	0.0428383	0.338297	#N/A
Solyc01g060050	37.9101	32.4588	19.865	34.991	18.7894	21.0534	40.4863	31.3404	30.4112	26.6172	-1.14254	0.495152	0.826057	WD40 domain-containing protein (AHRD V3.3 *** A0A2K3NUT6_TRIPR)
Solyc01g060070	34.0179	20.6444	33.7172	52.6778	14.3199	27.1144	24.1069	28.9137	33.4193	22.8085	-1.46521	0.0817601	0.439052	Outer envelope pore protein 16-2, chloroplastic (AHRD V3.3 *** A0A2G2XR36_CAPBA),Pfam:PF02466
Solyc01g060100	78.4464	75.5558	69.5584	45.9166	74.8636	69.8749	97.5281	87.2484	65.9614	81.6807	1.23831	0.186583	0.599695	serine/threonine-protein phosphatase 4 regulatory subunit 3-like (AHRD V3.3 --* XP_004229001.1)
Solyc01g060130	310.505	239.358	253.953	385.882	134.454	101.247	89.3818	129.262	292.133	111.987	-2.60863	7.37178e-06	0.00415658	TOMGTPASE Mill. GTPase
Solyc01g060140	6.89972	9.13898	7.6905	8.86548	8.43814	6.37287	6.07249	7.15613	8.09742	6.95275	-1.16463	0.483625	0.821238	Calmodulin-binding transcription activator 5 (AHRD V3.3 *-* A0A2G2XR50_CAPBA)
Solyc01g060170	34.4162	40.724	33.0893	49.1447	22.4197	12.6576	53.1531	46.5504	38.8548	28.9473	-1.34226	0.294396	0.703818	#N/A
Solyc01g060180	19.6987	23.465	20.7163	23.9597	16.6812	23.465	22.9513	17.5425	21.8858	19.9245	-1.09844	0.516679	0.834994	AMP-dependent synthetase/ligase (AHRD V3.3 *** A0A200R265_9MAGN)
Solyc01g060200	3.95651	16.3807	6.14218	10.9598	2.2939	10.1385	26.2449	15.6407	8.12723	9.88467	1.21624	0.662409	0.898557	3'-5' exonuclease domain (AHRD V3.3 *** A0A200QLJ1_9MAGN)
Solyc01g060250	33.3321	70.9731	23.0105	19.9753	51.299	55.4384	54.7986	64.153	32.292	56.2311	1.74133	0.0515387	0.366457	Unknown protein
Solyc01g060280	48.061	55.0189	40.2693	63.1626	49.6438	61.2327	26.5169	43.5213	50.9254	43.2781	-1.1767	0.381415	0.765975	AMSH-like ubiquitin thioesterase.1
Solyc01g060300	746.048	695.465	798.382	1412.42	1162.97	870.382	1061.47	649.382	874.59	913.946	1.045	0.782001	0.938851	agamous-like MADS-box protein AGL62 (AHRD V3.11 *-* XP_010319771.1)
Solyc01g060410	8.3512	8.06269	9.69574	17.3352	7.91003	18.6743	4.584	10.9562	10.3142	9.28073	-1.11135	0.71509	0.916564	GPI-anchored adhesin-like protein (AHRD V3.3 *** Q9M2F2_ARATH)
Solyc01g060460	8.14966	8.48036	8.34084	9.01981	7.94013	27.9133	8.65725	9.57994	8.49161	11.6438	1.37121	0.195717	0.607976	SNF2-related (AHRD V3.3 *** A0A200QQJ8_9MAGN)
Solyc01g065490	8.44745	7.95229	9.67146	8.67752	9.88023	8.30438	11.2054	13.8646	8.66516	10.6256	1.22624	0.242193	0.660402	NAD(P)-linked oxidoreductase, aldo/keto reductase family protein (AHRD V3.11 *** tr|A0A1Y1HY98|A0A1Y1HY98_KLENI)
Solyc01g065530	194.959	186.412	170.078	195.347	151.134	151.137	245.749	188.022	186.409	180.243	-1.03421	0.798018	0.944283	COBRA-like protein (AHRD V3.3 *** A0A2G3AIT3_CAPAN)
Solyc01g065550	7.69138	8.81919	8.95132	17.0697	6.85475	10.8974	10.6569	11.3334	10.0899	9.74599	-1.03529	0.852289	0.958981	Dehydration-induced 19-like protein (AHRD V3.3 *** E3T7S4_GOSHI)
Solyc01g065560	75.6886	111.942	79.0808	70.3606	161.056	143.405	74.6172	87.8269	82.8621	110.918	1.33859	0.320626	0.724851	DUF789 domain-containing protein (AHRD V3.3 *** A0A1Q3DF52_CEPFO)
Solyc01g065580	204.645	155.627	183.454	125.422	118.039	116.184	160.394	136.814	164.53	131.711	-1.24917	0.174015	0.586518	Pumilio-like protein 24 (AHRD V3.3 *** A0A2G2XR42_CAPBA)
Solyc01g065690	22.9499	13.745	28.2007	30.1253	23.234	20.1214	22.425	28.6971	22.7525	23.4201	1.02934	0.879117	0.964966	Heavy metal-associated isoprenylated plant protein (AHRD V3.3 *-* A0A2R6PJM0_ACTCH)
Solyc01g065720	124.126	111.046	120.386	109.613	107.578	153.735	102.724	143.541	116.132	124.964	1.07606	0.629732	0.885031	Phospholipase (AHRD V3.3 *** A0A2I4F1X9_9ROSI)
Solyc01g065770	31.6957	35.7563	31.3506	23.8798	21.561	31.1957	30.9051	32.8944	30.3499	28.756	-1.05543	0.703176	0.912475	NADH dehydrogenase subunit 7 (AHRD V3.11 *** tr|A0A290WKY4|A0A290WKY4_SOLLC)
Solyc01g065790	13.2742	6.17467	19.3271	20.7406	26.414	6.80212	10.2287	9.4585	13.4633	11.4823	-1.17252	0.629001	0.884637	#N/A
Solyc01g065810	73.7808	53.2373	66.7151	73.1196	45.6347	46.7936	59.2038	61.601	66.1613	52.8269	-1.25242	0.107998	0.48833	NADH dehydrogenase subunit 7 (AHRD V3.3 *-* A0A1B3IYY1_9LILI)
Solyc01g066170	5.16158	4.74968	26.227	12.5329	7.9923	6.21353	20.2215	12.8611	9.47462	10.6604	1.12516	0.765097	0.934953	#N/A
Solyc01g066310	100.29	101.05	82.3801	78.0605	72.2808	83.7054	98.2573	108.393	89.8487	89.5955	-1.00283	0.980364	0.994228	Acyl-CoA dehydrogenase family member 10 (AHRD V3.3 *** A0A1J3CLI6_NOCCA)
Solyc01g066430	23.6582	28.9455	21.5925	17.2288	23.8462	27.2472	22.0984	17.2715	22.4663	22.3156	-1.00675	0.968464	0.99108	RING-H2 finger protein ATL2-like (AHRD V3.3 *** A0A2I4E8K9_9ROSI)
Solyc01g066450	24.7995	15.7761	8.88979	8.70094	10.1716	7.96304	28.9173	29.1375	13.1894	16.1629	1.22545	0.551394	0.85503	Alpha/beta-Hydrolases superfamily protein (AHRD V3.3 *** A0A2U1Q133_ARTAN)
Solyc01g066460	65.5147	56.8582	39.5451	76.4404	75.4651	57.0902	29.6102	67.7151	57.9278	54.2137	-1.06851	0.758933	0.933212	#N/A
Solyc01g066470	133.92	126.729	141.302	169.3	175.719	163.821	189.139	198.926	141.949	181.412	1.27801	0.0281934	0.289856	#N/A
Solyc01g066480	24.4392	26.1843	16.3575	16.7015	25.3826	20.7479	32.2313	28.0339	20.448	26.2644	1.28445	0.138897	0.541801	Fumarylacetoacetate hydrolase family (AHRD V3.3 *** A0A1Y1HN88_KLENI)
Solyc01g066520	23.5902	11.2267	23.609	16.512	14.3015	15.8909	17.8456	8.63358	17.9252	13.6793	-1.31039	0.220893	0.636381	Dihydrolipoamide acetyltransferase component of pyruvate dehydrogenase complex (AHRD V3.3 *** A0A024B875_SOLTU)
Solyc01g066590	39.1086	36.0218	39.7772	31.1446	59.0423	47.1186	23.7817	46.9388	36.3466	41.9791	1.15497	0.444986	0.801499	Dynein light chain (AHRD V3.3 *** A0A2G3DI71_CAPCH)
Solyc01g066610	15.5271	16.8426	13.74	7.98411	19.6246	14.7916	19.7149	10.1037	13.0145	15.5068	1.1915	0.441749	0.79873	Fanconi anemia group I protein (AHRD V3.3 *** A0A2I4F1R6_9ROSI)
Solyc01g066620	297.91	130.789	70.0049	14.2662	12.5554	5.89506	547.682	397.228	78.9811	63.3464	-1.24681	0.81549	0.949991	Glyoxysomal fatty acid beta-oxidation multifunctional protein MFP-a (AHRD V3.3 *** A0A2G3AJZ7_CAPAN)
Solyc01g066710	25.9402	17.8374	13.663	23.1382	17.2798	23.7572	14.5316	19.6135	19.5567	18.4948	-1.05741	0.777696	0.937818	#N/A
Solyc01g066730	9.94925	29.9166	15.8997	24.0114	82.2881	70.187	8.71614	33.1597	18.3602	35.9445	1.95774	0.15131	0.557239	Transcription factor, MADS-box (AHRD V3.3 *-* A0A2U1LSQ9_ARTAN)
Solyc01g066740	66.3167	52.171	40.5478	56.9478	47.1204	31.0707	62.817	64.0316	53.1648	49.2615	-1.07923	0.656591	0.896885	Transducin/WD40 repeat-like superfamily protein (AHRD V3.3 *-* A0A2U1LEC3_ARTAN)
Solyc01g066770	36.4141	55.2799	46.0359	57.5388	53.2372	80.6871	30.5268	41.1656	48.0533	48.2013	1.00308	0.987743	0.99633	Chaperone protein dnaJ 49 (AHRD V3.11 *** tr|A0A2G3B5J1|A0A2G3B5J1_CAPCH)
Solyc01g066820	20.7674	27.9222	16.6347	14.3964	32.8015	17.6122	65.35	29.2853	19.3041	32.4266	1.67977	0.0499113	0.362427	Kinesin-like protein (AHRD V3.3 *** A0A2G3CJ78_CAPCH)
Solyc01g066830	10.7057	20.7	10.3412	35.9691	9.35744	13.9281	22.8759	14.8754	16.9442	14.5119	-1.16761	0.613546	0.879637	Ubiquitin-like-specific protease ESD4 (AHRD V3.3 *** A0A1U8EF37_CAPAN)
Solyc01g066860	49.2326	47.2413	47.398	79.2299	74.007	55.974	56.4837	52.9388	54.3633	59.3252	1.09127	0.510365	0.831703	hypothetical protein (AHRD V3.3 *** AT1G63310.1)
Solyc01g066870	17.6274	30.3923	32.6554	16.5924	24.0087	34.5333	25.1313	25.9539	23.2115	27.1179	1.16829	0.381985	0.766485	Protein phosphatase 2C (AHRD V3.3 *** A0A2U1QFI0_ARTAN)
Solyc01g066880	16.7093	17.3871	15.1555	19.0644	18.9454	17.775	25.4881	25.2321	17.0214	21.5725	1.26738	0.0861258	0.447989	heavy metal-associated isoprenylated plant protein 3-like (AHRD V3.3 *** A0A2G3ALM1_CAPAN)
Solyc01g066900	77.2062	92.3013	72.6301	60.9293	77.4652	100.49	88.7984	80.4507	74.9378	86.3556	1.15236	0.359942	0.75119	uveal autoantigen with coiled-coil/ankyrin (AHRD V3.3 *** AT4G15790.1)
Solyc01g066910	38.4284	41.8475	36.7748	33.4162	56.5905	60.1939	43.8617	46.7214	37.4936	51.4013	1.37093	0.0186995	0.244381	Bifunctional inhibitor/plant lipid transfer protein/seed storage helical domain containing protein (AHRD V3.3 *** A0A2P5CY45_TREOI)
Solyc01g066940	31.022	28.7842	22.5695	31.8075	21.2501	19.8079	25.9796	30.5613	28.2956	24.0437	-1.17684	0.301783	0.711459	Vesicle-associated membrane protein (AHRD V3.3 *** A0A1U8E616_CAPAN)
Solyc01g066990	12.515	10.6048	21.3759	19.5243	16.7133	9.68185	13.7639	18.3912	15.3412	14.2263	-1.07836	0.70307	0.912475	Unknown protein
Solyc01g067030	34.272	43.5354	31.67	19.1593	50.7309	53.9434	18.1894	31.633	30.8462	35.4236	1.14839	0.591711	0.873691	F-box protein (AHRD V3.3 *** A0A2K3P6V3_TRIPR)
Solyc01g067040	16.9559	18.8286	12.704	16.4618	19.5587	15.3297	24.0575	17.0291	16.0746	18.721	1.16464	0.334101	0.73315	Tudor/PWWP/MBT superfamily protein (AHRD V3.3 *-* A0A1I9LQQ5_ARATH)
Solyc01g067070	38.2508	45.16	42.3446	51.7528	42.6611	24.3802	60.4977	34.897	44.1094	38.4945	-1.14586	0.512227	0.833027	Mitochondrial carrier protein (AHRD V3.3 *** A0A200QX10_9MAGN)
Solyc01g067080	17.8495	19.4079	10.6524	18.0471	12.3059	15.0101	8.39911	18.7961	16.0644	13.0677	-1.22932	0.349321	0.745514	dynein beta chain%2C ciliary protein (AHRD V3.3 *** AT3G21400.1)
Solyc01g067130	6.46409	8.25107	6.90142	9.10944	10.2365	21.8603	5.96267	7.77665	7.6096	10.0928	1.32632	0.284573	0.6981	Nuclear transcription factor Y subunit B (AHRD V3.11 *** tr|A0A2G2X323|A0A2G2X323_CAPBA)
Solyc01g067160	7.70161	12.9275	6.05309	4.61205	18.6064	6.83389	5.66987	7.4227	7.26093	8.55296	1.17794	0.561784	0.859293	AAA+ ATPase domain-containing protein (AHRD V3.3 *-* A0A2U1KZ76_ARTAN)
Solyc01g067210	13.3234	24.7149	15.7326	5.73788	30.5329	7.07073	7.68464	19.2483	13.1305	13.3679	1.01808	0.961087	0.988706	Cullin (AHRD V3.11 *-* tr|A0A200Q1J8|A0A200Q1J8_9MAGN)
Solyc01g067240	69.9054	54.3691	122.739	87.3616	100.519	54.7193	86.1308	90.1875	79.899	80.8487	1.01189	0.947245	0.985159	#N/A
Solyc01g067270	12.0514	14.0163	17.533	17.4743	14.0759	11.8499	15.952	16.501	15.0828	14.4754	-1.04196	0.790133	0.942567	Cullin (AHRD V3.3 *-* A0A200Q1J8_9MAGN)
Solyc01g067280	128.191	88.8562	78.5984	84.842	92.9259	68.1432	104.215	95.333	93.356	89.0601	-1.04824	0.748132	0.928946	F-box-like protein (AHRD V3.3 *** AT4G15563.9)
Solyc01g067350	135.432	343.715	374.358	106.215	366.474	492.624	17.9401	110.017	207.419	137.392	-1.50969	0.58596	0.871845	Glycosyltransferase (AHRD V3.3 *** R9WWA4_SOLLC)
Solyc01g067360	74.8747	92.8839	83.4569	41.256	72.0478	77.1472	72.7901	76.6006	69.953	74.6124	1.06661	0.700192	0.911379	E3 ubiquitin-protein ligase MIEL1-like (AHRD V3.3 *** A0A1S4C6Z0_TOBAC)
Solyc01g067370	51.2229	38.8109	72.3127	69.2614	52.4654	36.612	31.0184	61.2997	56.1734	43.7163	-1.28495	0.222038	0.636381	TSB
Solyc01g067380	24.752	20.3203	16.2908	25.8464	14.0176	26.8492	16.1866	28.4332	21.4521	20.4008	-1.05154	0.791365	0.942567	Alpha/beta-Hydrolases superfamily protein (AHRD V3.3 *** Q6DBI3_ARATH)
Solyc01g067480	115.156	113.931	93.3359	67.8413	88.5134	131.109	87.8739	85.0333	95.4703	96.4989	1.01077	0.94584	0.984916	Acyl-CoA-binding domain-containing protein 4-like (AHRD V3.3 *** A0A2K3NUA0_TRIPR)
Solyc01g067510	62.8437	65.2984	33.6775	28.2177	38.3207	51.762	76.2252	49.997	44.4382	52.4351	1.17995	0.434308	0.79374	receptor-like protein kinase FERONIA (AHRD V3.3 *** A0A2I4F2T3_9ROSI)
Solyc01g067530	46.3476	46.0863	37.0576	86.0287	21.1076	17.6917	23.8904	37.6645	51.0834	24.0764	-2.12173	0.00844883	0.17694	GTPase OBG (AHRD V3.3 *** A0A2K3PK04_TRIPR)
Solyc01g067560	58.3974	59.5933	54.8793	43.2574	35.5653	33.8267	30.1356	61.1031	53.6124	38.5796	-1.38966	0.118952	0.510046	Protein always early 3 (AHRD V3.3 *** A0A1J6HVB4_NICAT)
Solyc01g067580	37.824	45.8968	46.5099	67.8302	57.0872	54.1614	23.7998	54.8154	48.376	44.8153	-1.07945	0.705231	0.913453	E3 ubiquitin-protein ligase Chr5:6153924-6155504 FORWARD LENGTH=125 201606 (AHRD V3.11 *** AT5G18540.4)
Solyc01g067600	102.024	82.5383	71.4427	95.3792	115.39	87.7755	150.619	75.8014	87.0346	103.699	1.19147	0.252461	0.671081	Zinc finger, CW-type (AHRD V3.3 *-* A0A2U1Q0A5_ARTAN)
Solyc01g067630	55.0255	29.579	40.5589	39.1084	50.505	45.8613	18.5888	35.7105	40.0844	35.2133	-1.13833	0.589721	0.872474	NAD(P)-binding Rossmann-fold superfamily protein (AHRD V3.3 *** Q8VZB1_ARATH)
Solyc01g067640	51.5185	49.2399	38.5117	104.755	44.5403	60.1599	53.1273	48.488	56.5604	51.257	-1.10347	0.635765	0.885501	Protein kinase domain (AHRD V3.3 *** A0A200Q1N4_9MAGN)
Solyc01g067670	14.7514	16.6596	12.7765	78.2998	30.9565	15.8122	15.0353	13.961	22.2673	17.9037	-1.24372	0.555816	0.856977	#N/A
Solyc01g067680	110.899	89.6865	61.846	111.665	135.603	85.1042	72.9218	61.1554	91.0378	84.699	-1.07484	0.718814	0.917053	Tubby-like F-box protein (AHRD V3.3 *** A0A2G3DFX8_CAPCH)
Solyc01g067720	8.57837	6.68038	5.59556	10.3636	9.86416	16.8134	5.64118	7.8856	7.59259	9.26787	1.22065	0.45087	0.804685	Vesicle-associated protein 1.1
Solyc01g067790	58.3812	30.8766	18.749	14.3935	24.0771	19.7071	25.1216	32.9566	26.4096	25.0354	-1.05489	0.845968	0.957728	BRCT domain-containing DNA repair protein (AHRD V3.3 *-* A0A1P8B7K8_ARATH)
Solyc01g067800	40.6121	36.155	29.0207	55.7343	26.8779	32.8394	21.8308	27.2319	39.2567	26.9144	-1.45858	0.0291597	0.292542	Zinc finger protein (AHRD V3.3 *** A0A2K3PE50_TRIPR)
Solyc01g067830	12.4682	14.0166	11.2679	27.51	11.5986	8.25514	9.76397	11.0377	15.2561	10.0788	-1.51368	0.040936	0.332212	.1
Solyc01g067940	118.198	103.212	81.2289	81.7887	86.1983	89.1444	93.9907	109.5	94.8825	94.3025	-1.00615	0.955452	0.987571	Unknown protein
Solyc01g068030	79.6989	100.463	54.907	76.0828	74.8195	55.2377	64.6935	83.4567	76.049	68.7295	-1.1065	0.472557	0.813864	Polyketide cyclase / dehydrase and lipid transport protein (AHRD V3.3 *** Q1G3L2_ARATH)
Solyc01g068040	104.147	187.861	136.737	119.851	257.192	279.329	20.1185	115.05	133.814	113.557	-1.17839	0.766172	0.934953	Werner Syndrome-like exonuclease (AHRD V3.3 *** A0A2I0WSX7_9ASPA)
Solyc01g068050	10.5151	10.4028	31.6808	15.73	11.9255	15.8384	8.41832	11.3166	15.2799	11.582	-1.31929	0.427637	0.790972	tRNA:m(4)X modification enzyme TRM13 homolog (AHRD V3.3 *** A0A2I4DJN8_9ROSI)
Solyc01g068070	191.317	164.277	144.082	175.52	142.47	134.746	263.536	134.307	167.906	161.452	-1.03997	0.818639	0.951145	Transducin family protein / WD-40 repeat family protein (AHRD V3.3 *-* AT4G01860.2)
Solyc01g068080	895.664	1649.63	1433.41	901.618	1498.19	1954.9	266.293	1111.02	1175.52	964.814	-1.21839	0.644009	0.890156	NAD(P)-binding Rossmann-fold superfamily protein (AHRD V3.3 *** A0A2U1PJA8_ARTAN)
Solyc01g068130	17.4658	16.2632	23.7616	14.9562	11.6124	18.027	23.2501	14.5745	17.8247	16.3198	-1.09221	0.628546	0.884576	calcium/calcium/calmodulin-dependent Serine/Threonine-kinase (AHRD V3.3 *** AT2G47010.2)
Solyc01g068160	85.0369	97.8073	74.5791	46.2503	19.076	24.5066	48.1787	59.1131	73.1859	33.9686	-2.15452	0.0118348	0.204745	Pyridoxal phosphate (PLP)-dependent transferases superfamily protein (AHRD V3.3 *** A0A2U1MVH0_ARTAN)
Solyc01g068210	79.0523	81.0421	101.024	90.6256	132.363	69.0618	82.608	97.5269	87.5135	92.6378	1.05855	0.693524	0.909933	Glutamate dehydrogenase (AHRD V3.3 *** A0A2I4GHF6_9ROSI)
Solyc01g068240	50.8577	55.4394	58.1371	65.5791	32.3444	38.4571	35.8106	58.0849	57.2596	40.1063	-1.4277	0.129392	0.527599	Ubiquitin carboxyl-terminal hydrolase 24 (AHRD V3.3 *** A0A2G3DH37_CAPCH)
Solyc01g068250	37.3796	63.0346	46.4294	36.5537	73.2806	94.9756	32.9797	54.9804	44.7182	59.6024	1.33285	0.212527	0.626252	Transducin/WD40 repeat-like superfamily protein (AHRD V3.3 *** A0A2U1NST7_ARTAN)
Solyc01g068260	39.2192	45.4717	31.2593	37.4831	19.0657	30.1274	27.7061	43.932	38.0201	28.9163	-1.31484	0.242775	0.661205	DNA topoisomerase 2-binding protein.1
Solyc01g068270	30.7216	36.5145	20.8578	22.5351	18.185	28.4942	27.6348	43.0747	26.9469	28.0245	1.03999	0.864792	0.962465	Protein kinase family protein (AHRD V3.3 *** S8DW53_9LAMI)
Solyc01g068280	80.3393	99.4058	100.899	85.8595	80.7768	84.222	76.0617	74.7014	91.2019	78.85	-1.15665	0.236474	0.65457	Protein CHROMATIN REMODELING 24 (AHRD V3.3 *** A0A2G3DH52_CAPCH)
Solyc01g068290	42.7324	14.3705	14.2571	12.6495	17.091	17.6854	20.7503	22.134	18.2425	19.3026	1.05811	0.821762	0.951953	tRNA uridine 5-carboxymethylaminomethyl modification enzyme MnmG (AHRD V3.3 *** A0A2G3AKP6_CAPAN),Pfam:PF01134
Solyc01g068320	8.3442	8.64142	8.58642	12.4426	9.47713	18.0356	7.8282	10.5523	9.36857	10.9007	1.16354	0.419005	0.786079	SNF2-related (AHRD V3.3 *** A0A200QQJ8_9MAGN)
Solyc01g068330	23.0146	12.989	17.7053	27.6756	9.29727	12.6344	44.944	20.753	19.5634	18.1935	-1.0753	0.811997	0.948952	Cell division control protein 48-like protein C (AHRD V3.3 *** A0A2G3DH55_CAPCH)
Solyc01g068340	10.7884	12.4671	12.8515	15.2696	5.88502	7.69129	6.62073	12.1937	12.7461	7.77494	-1.63938	0.00953865	0.184843	Crossover junction endonuclease MUS.1
Solyc01g068360	6.00104	10.149	5.07676	11.8152	9.51054	7.0415	8.45441	10.9189	7.77445	8.86714	1.14055	0.557938	0.857669	Leucine-rich repeat protein kinase family protein (AHRD V3.3 *-* A0A2U1Q3K2_ARTAN)
Solyc01g068370	21.6275	21.8388	22.0924	31.6849	11.8241	9.43235	13.8943	15.3521	23.9791	12.4193	-1.93079	0.017546	0.239838	histone-lysine N-methyltransferase SUVR3 (AHRD V3.3 *** A0A2I4DIZ4_9ROSI)
Solyc01g068400	19.3929	23.8539	14.0691	7.04227	12.4115	17.8912	9.60332	13.6608	14.6317	13.0644	-1.11997	0.634432	0.885376	Tubulin-specific chaperone A (AHRD V3.3 *** A0A2G2XQI4_CAPBA)
Solyc01g068460	11.3815	17.3538	4.4834	25.0413	11.2039	11.29	20.5485	13.3681	12.203	13.653	1.11883	0.727002	0.918977	Plant calmodulin-binding-like protein (AHRD V3.3 *** G7IW85_MEDTR)
Solyc01g068480	92.3879	80.892	66.543	116.839	91.8949	69.4544	96.0248	92.0652	87.3078	86.6698	-1.00736	0.960626	0.988581	P-loop containing nucleoside triphosphate hydrolases superfamily protein (AHRD V3.3 *** A0A2U1P5L6_ARTAN)
Solyc01g068500	66.8054	38.0326	28.7038	67.0714	74.4317	16.5872	101.217	119.905	47.0285	62.2164	1.32295	0.452441	0.805142	ERD (Early-responsive to dehydration stress) family protein (AHRD V3.11 *** tr|A0A2K3NJK3|A0A2K3NJK3_TRIPR)
Solyc01g068540	122.574	178.358	157.296	110.712	124.177	168.511	33.9224	89.1071	139.685	89.18	-1.56633	0.189277	0.601479	Homeodomain-like superfamily protein (AHRD V3.3 *-* AT3G53440.2)
Solyc01g068580	20.2955	11.8888	15.9111	10.5604	19.4855	12.8703	17.8027	18.8199	14.1899	17.0255	1.19983	0.31921	0.723283	Hepatocellular carcinoma-associated antigen 59 (AHRD V3.11 *-* tr|A0A200R1K4|A0A200R1K4_9MAGN)
Solyc01g068610	69.1654	113.957	96.9427	60.6069	79.6689	76.2862	54.0917	87.2076	82.4929	73.1737	-1.12736	0.484677	0.821497	#N/A
Solyc01g068630	98.6957	17.6909	21.4734	28.383	13.0348	6.50761	91.6367	64.0776	32.1183	26.566	-1.209	0.747854	0.928703	Haloacid dehalogenase-like hydrolase (HAD) superfamily protein (AHRD V3.3 *** A0A2U1PYM0_ARTAN),Pfam:PF13419
Solyc01g068640	10.9427	10.7274	12.5221	8.5009	8.13031	7.20269	10.681	15.3989	10.5728	9.90662	-1.06725	0.729448	0.919937	AarF domain-containing protein kinase 4 (AHRD V3.3 *** A0A2G2XSA9_CAPBA)
Solyc01g073660	63.6649	116.991	105.304	57.4692	125.054	165.217	50.6041	126.882	81.9376	107.321	1.30979	0.264061	0.68236	Major facilitator superfamily protein (AHRD V3.3 *** A0A2U1LP11_ARTAN),Pfam:PF13347
Solyc01g073680	55.1929	56.6543	41.5555	39.9978	22.6814	29.9379	45.5914	29.209	47.7469	30.837	-1.54836	0.0237164	0.273187	Bifunctional inhibitor/lipid-transfer protein/seed storage 2S albumin superfamily protein (AHRD V3.11 *** tr|A0A061DVR0|A0A061DVR0_THECC)
Solyc01g073730	59.8253	103.955	185.19	43.2734	238.626	560.415	52.6854	273.504	84.0218	209.517	2.49361	0.0799716	0.435251	GTP 3',8-cyclase, mitochondrial (AHRD V3.3 *** CNX2_ARATH)
Solyc01g073760	18.8842	25.0756	32.8236	31.2328	24.4169	36.6238	54.9217	25.2321	26.3959	33.3648	1.26401	0.288998	0.699885	#N/A
Solyc01g073870	16.5919	15.1763	8.28054	18.3437	6.32766	9.64211	11.4686	7.2586	13.9847	8.44198	-1.65656	0.0347395	0.317703	#N/A
Solyc01g073920	30.9946	26.3617	26.1925	17.6048	25.8908	21.2813	10.6962	7.1297	24.7752	14.3173	-1.73044	0.0559177	0.377821	Proline-rich family protein (AHRD V3.11 *** tr|Q8GYK6|Q8GYK6_ARATH)
Solyc01g073930	18.3679	13.799	24.6842	13.9926	26.8775	29.9507	24.7639	23.1299	17.2011	26.0584	1.51492	0.0234118	0.271898	Protein N-terminal asparagine amidohydrolase (AHRD V3.3 *** A0A200QRE4_9MAGN)
Solyc01g074000	34.0116	32.0391	27.4425	29.5237	26.0231	20.2629	20.3452	20.2358	30.6532	21.5855	-1.42009	0.0254707	0.278903	Histone H3 (AHRD V3.11 *** tr|B3TM40|B3TM40_ELAGV)
Solyc01g074010	107.761	116.703	81.4164	125.762	96.8372	136.02	124.222	139.304	106.525	122.872	1.15345	0.353307	0.746839	Protein kinase domain (AHRD V3.11 *** tr|A0A200RDU7|A0A200RDU7_9MAGN)
Solyc01g074020	33.409	24.9814	23.2756	18.9226	14.2841	25.3006	33.7021	17.474	24.623	21.4787	-1.14639	0.548804	0.854021	Zinc finger, HIT-type (AHRD V3.3 *** A0A2U1P2A6_ARTAN)
Solyc01g074030	55.617	62.6702	56.371	46.5689	17.5603	45.3178	19.1299	35.6651	54.9991	27.145	-2.02612	0.010469	0.192142	Beta-glucosidase (AHRD V3.3 *** Q43014_PRUAV)
Solyc01g079060	17.638	19.676	25.1902	13.6608	16.5958	9.71504	24.101	17.9765	18.5898	16.2572	-1.14348	0.521761	0.837448	Snf7 (AHRD V3.11 *** tr|A0A200R1Q7|A0A200R1Q7_9MAGN)
Solyc01g079070	15.2044	13.5834	18.4963	16.2326	13.4624	14.9623	18.3145	18.5676	15.7802	16.1778	1.0252	0.856254	0.959895	#N/A
Solyc01g079090	104.574	74.5239	69.6967	106.384	74.8635	75.2151	84.753	79.2666	87.1869	78.4251	-1.11172	0.382552	0.76661	Protoporphyrinogen oxidase (AHRD V3.3 *** O64384_SOLTU)
Solyc01g079100	15.4241	22.3962	22.05	27.075	13.0187	19.0663	14.9281	17.0097	21.3102	15.8447	-1.34494	0.139592	0.543009	S-acyltransferase (AHRD V3.3 *** A0A2G2XQX7_CAPBA)
Solyc01g079110	110.987	92.9431	88.2459	67.2396	66.8677	81.423	69.4891	63.6203	88.4509	70.0437	-1.2628	0.063531	0.397163	Histone H3 (AHRD V3.11 *** tr|A0A2G3DHD8|A0A2G3DHD8_CAPCH)
Solyc01g079150	14.7647	6.70374	17.1408	7.98917	7.3567	6.61422	8.51229	14.8886	10.7899	8.86167	-1.2176	0.458837	0.808738	HCO3-transporter family (AHRD V3.3 *** A0A2U1KUW6_ARTAN)
Solyc01g079160	129.29	226.807	128.823	104.66	293.945	317.705	41.1827	79.4533	141.01	132.215	-1.06652	0.898387	0.971086	GDSL esterase/lipase (AHRD V3.11 *** tr|A0A2G3AJV6|A0A2G3AJV6_CAPAN)
Solyc01g079180	15.3601	23.2403	32.0268	28.5979	43.8174	72.611	6.93586	35.0921	23.9123	29.6647	1.24056	0.637912	0.886583	Pectinesterase (AHRD V3.3 *** A0A2G2XQP7_CAPBA)
Solyc01g079240	455.341	326.577	406.79	327.684	200.93	157.215	468.962	366.996	375.221	271.541	-1.38182	0.16645	0.57938	Long chain acyl-CoA synthetase.1
Solyc01g079260	9.6724	10.0399	9.37483	13.7797	8.20059	10.5509	6.63813	14.7773	10.5832	9.59828	-1.10261	0.58949	0.872474	WRKY transcription factor (AHRD V3.11 *** tr|A0A2I4GEI8|A0A2I4GEI8_9ROSI)
Solyc01g079290	15.8627	18.8094	7.32122	16.0151	83.7396	92.0091	10.4959	25.8683	13.6762	38.031	2.78081	0.0442787	0.344366	Ubiquitin-conjugating enzyme (AHRD V3.3 *** A0A200R0D5_9MAGN)
Solyc01g079310	12.8635	20.1174	9.74623	15.4609	14.5401	16.9903	14.0195	16.0937	14.0524	15.3652	1.09342	0.611284	0.879526	Heme binding protein (AHRD V3.3 *** Q9LZQ3_ARATH)
Solyc01g079320	16.5884	22.4636	16.1511	12.7998	10.3914	8.51713	15.4669	11.2693	16.6599	11.1447	-1.49488	0.121345	0.514048	Pentatricopeptide repeat (AHRD V3.11 *** tr|A0A200PWD1|A0A200PWD1_9MAGN)
Solyc01g079330	82.3776	76.5727	59.1663	62.9536	67.9344	76.551	94.2302	85.4843	69.6217	80.4506	1.15554	0.243062	0.661282	RNA helicase DEAD3
Solyc01g079340	30.5964	17.8089	8.056	33.3258	45.6537	45.2093	31.3037	32.6508	19.557	38.1108	1.9487	0.0405325	0.332184	Serine/threonine-protein kinase (AHRD V3.3 *** A0A2G2XQS7_CAPBA)
Solyc01g079350	33.4908	49.7254	49.049	28.5012	69.0075	49.9796	63.1921	44.8299	39.0615	55.9088	1.4313	0.0313483	0.301506	HIT zinc finger and PAPA-1-like domain-containing protein (AHRD V3.3 *-* F4I548_ARATH)
Solyc01g079360	8.13743	6.43474	10.187	10.1163	12.9148	12.1503	10.5873	8.55134	8.57082	10.9175	1.2738	0.131931	0.529762	WRKY transcription factor 37
Solyc01g079390	195.595	214.975	230.624	224.033	217.848	206.618	304.858	314.712	215.894	256.35	1.18739	0.13394	0.531283	Histone-lysine N-methyltransferase (AHRD V3.11 *-* tr|A0A2G3DHW7|A0A2G3DHW7_CAPCH)
Solyc01g079400	13.9574	15.9546	20.561	33.9324	11.3972	7.00734	15.719	28.8063	19.8535	13.7901	-1.4397	0.194671	0.607275	Protein trichome birefringence-like 6 (AHRD V3.3 *** A0A2G3AKU6_CAPAN)
Solyc01g079410	807.336	887.346	794.746	633.477	984.144	1061.85	655.663	773.813	774.955	853.315	1.10112	0.419924	0.786744	Calcium-dependent phosphotriesterase superfamily protein (AHRD V3.3 *** A0A2U1MTE8_ARTAN)
Solyc01g079430	20.1453	13.7037	12.3602	14.5951	12.7814	12.3053	23.5148	12.2916	14.9386	14.6018	-1.02307	0.904331	0.972644	Plant organelle RNA recognition domain (AHRD V3.3 *** A0A200QLU5_9MAGN)
Solyc01g079450	191.684	207.644	204.232	143.274	211.486	149.596	155.057	188.407	184.735	174.36	-1.0595	0.657432	0.896913	Peptidase S9 (AHRD V3.3 *** A0A200R223_9MAGN)
Solyc01g079490	32.3844	29.7532	43.012	62.7397	43.7235	38.2758	51.0467	50.147	40.156	45.4949	1.13295	0.55739	0.857295	Vacuolar protein sorting-associated protein 51-like protein (AHRD V3.3 *** A0A2S1CEW9_PRUYE)
Solyc01g079500	515.074	525.45	510.532	480.245	306.046	260.389	494.884	323.109	507.542	335.981	-1.51062	0.00364885	0.125818	DNA replication licensing factor MCM7 (AHRD V3.11 *** tr|A0A1U8FE76|A0A1U8FE76_CAPAN)
Solyc01g079510	126.544	93.1693	58.0718	137.674	82.1943	88.5503	81.5725	110.611	98.5333	90.0209	-1.09456	0.591729	0.873691	WD40 domain-containing protein (AHRD V3.3 *** A0A178W3E8_ARATH)
Solyc01g079520	99.145	99.0169	107.082	64.1209	84.7153	72.6862	73.0107	69.0944	90.6095	74.6553	-1.2137	0.12817	0.525306	#N/A
Solyc01g079550	398.41	529.78	320.873	278.266	765.067	788.746	76.2106	235.605	370.514	322.633	-1.14841	0.803375	0.945586	Multidrug resistance protein ABC transporter family protein, putative (AHRD V3.3 *** A0A061DZ20_THECC)
Solyc01g079570	44.3245	33.3644	38.897	43.3749	59.4908	43.1558	32.4166	44.0588	39.7439	43.7595	1.10104	0.476954	0.816749	Beta-D-xylosidase.1
Solyc01g079580	50.474	48.4219	35.4589	58.9375	49.1654	57.5793	51.5425	40.2629	47.5397	49.2322	1.0356	0.821266	0.95168	Tetratricopeptide repeat (TPR)-like superfamily protein (AHRD V3.3 *** A0A2U1LZR6_ARTAN)
Solyc01g079600	186.1	232.643	197.436	220.288	303.548	338.658	178.399	209.458	208.312	248.954	1.1951	0.255742	0.673489	Alpha/beta-Hydrolases superfamily protein (AHRD V3.3 *** A0A2U1L2I9_ARTAN)
Solyc01g079610	134.233	133.382	162.796	218.048	30.7527	40.1235	46.5511	41.9436	158.777	39.3976	-4.03012	2.40278e-06	0.00296979	DnaJ protein ERDJ3B (AHRD V3.3 *** A0A2G2Z6I0_CAPAN)
Solyc01g079630	29.5397	25.1902	23.5713	29.8564	11.8668	26.7192	33.1822	33.2182	26.9008	24.3142	-1.10638	0.622604	0.882512	sucrose-phosphatase-like protein (AHRD V3.3 *-* AT3G62620.8)
Solyc01g079650	10.2342	6.51225	14.5485	11.5705	7.59311	9.20665	4.81418	5.72523	10.2917	6.62535	-1.55339	0.0342043	0.316425	CTP synthase (AHRD V3.3 *** A0A2G3AL34_CAPAN)
Solyc01g079690	54.4651	41.0563	57.9485	96.2805	70.892	45.0932	31.7844	86.9028	59.4319	54.5116	-1.09026	0.717051	0.917053	#N/A
Solyc01g079700	199.066	166.225	143.522	175.981	122.645	143.97	209.329	200.861	170.028	165.068	-1.03005	0.813072	0.949567	Helicase, C-terminal (AHRD V3.3 *-* A0A2U1NPJ2_ARTAN)
Solyc01g079710	75.4493	73.3469	60.4344	31.6517	49.9858	31.6194	47.1121	62.2892	57.04	46.4073	-1.22912	0.325716	0.727512	Deoxyribose-phosphate aldolase (AHRD V3.3 *** A0A166YQY4_9PEZI)
Solyc01g079720	109.7	94.8308	101.911	92.5878	148.477	140.133	163.114	119.308	99.5365	141.853	1.42514	0.0104046	0.192142	Protein phosphatase 2C 70 (AHRD V3.3 *** A0A1U8E8U4_CAPAN)
Solyc01g079750	57.7435	81.3439	32.0541	19.7934	49.5189	32.8147	64.6371	76.3629	41.5487	53.2171	1.28083	0.451388	0.804919	MAP kinase kinase kinase 4
Solyc01g079760	91.8769	53.9377	61.4363	54.5018	50.0699	49.2914	65.0863	50.6687	63.8239	53.4127	-1.19492	0.262736	0.680965	Peroxisomal adenine nucleotide carrier.1
Solyc01g079790	101.645	77.1898	72.206	65.3775	99.8791	102.491	54.8485	71.8919	78.012	79.7078	1.02174	0.89852	0.971086	Glucose-1-phosphate adenylyltransferase (AHRD V3.11 *** tr|K4AXM4|K4AXM4_SOLLC)
Solyc01g079800	11.7277	11.2072	11.463	5.51467	7.17744	4.84706	6.85569	6.96517	9.5473	6.38422	-1.49545	0.0873485	0.449785	DEAD-box ATP-dependent RNA helicase 58, chloroplastic (AHRD V3.11 *** tr|A0A2G3AL49|A0A2G3AL49_CAPAN)
Solyc01g079850	19.6699	42.691	33.3813	30.845	43.4299	36.6931	18.1541	24.8813	30.4935	29.1276	-1.04689	0.863372	0.961639	Protein trichome birefringence-like .1
Solyc01g079860	113.64	144.353	144.722	199.264	178.962	145.268	204.454	228.956	147.479	186.775	1.26645	0.0891557	0.4535	ATP-dependent (S)-NAD(P)H-hydrate dehydratase (AHRD V3.3 *** A0A1U8EBN0_CAPAN)
Solyc01g079890	366.746	564.022	793.42	187.684	528.999	849.852	362.964	448.86	418.936	520.227	1.24178	0.435548	0.79374	NOD26-like intrinsic protein 7.1
Solyc01g079950	10.1843	14.4113	16.9322	8.30859	13.3625	9.00186	31.4318	11.4067	11.9872	14.4108	1.20218	0.475526	0.815839	Eukaryotic aspartyl protease family protein (AHRD V3.11 *** tr|A0A2U1ML86|A0A2U1ML86_ARTAN)
Solyc01g080020	111.414	114.892	103.366	120.814	105.015	105.137	49.913	91.6319	112.442	84.2979	-1.33387	0.11377	0.500498	Eukaryotic aspartyl protease family protein (AHRD V3.3 *** A0A2U1ML86_ARTAN)
Solyc01g080040	7.53933	12.5906	15.3684	14.0761	5.03679	15.5539	8.80583	8.46299	11.9708	8.74122	-1.36946	0.252598	0.671081	Dual specificity protein phosphatase.1
Solyc01g080080	30.3752	43.7879	41.9788	40.8619	38.9635	29.3253	19.0877	10.4341	38.8647	21.8412	-1.77942	0.067977	0.409057	RING/U-box superfamily protein (AHRD V3.3 *** A0A2U1KJJ9_ARTAN)
Solyc01g080110	54.0661	54.9067	60.9651	43.7116	66.5037	54.853	63.9453	56.0681	53.0343	60.1371	1.13393	0.394567	0.773026	SNARE associated Golgi protein family (AHRD V3.3 *** B6U042_MAIZE)
Solyc01g080130	27.4988	29.78	24.6266	22.6214	31.1968	47.6792	37.2214	30.4543	25.9891	36.0346	1.38653	0.0311902	0.301427	Cytochrome P450 family protein (AHRD V3.3 *** Q9M8K3_ARATH)
Solyc01g080140	33.8585	38.8307	44.6093	20.857	35.4763	37.2076	21.9439	29.0666	33.2568	30.2914	-1.09789	0.63425	0.885376	UPF0613 protein PB24D3.06c (AHRD V3.3 *** A0A1J3GSX0_NOCCA)
Solyc01g080160	5.97827	7.62885	9.74487	7.98286	11.6973	10.2578	9.34826	11.186	7.71778	10.5837	1.37134	0.0692643	0.413715	DUF21 domain-containing protein (AHRD V3.11 *** tr|A0A2G2Y4P4|A0A2G2Y4P4_CAPAN)
Solyc01g080180	141.509	167.099	136.849	150.289	160.639	164.006	117.283	129.91	148.501	141.546	-1.04914	0.633144	0.885376	Ribosomal protein L34e superfamily protein (AHRD V3.3 *-* A0A1P8BBG9_ARATH)
Solyc01g080200	39.0634	75.4541	24.5521	35.849	34.9822	41.9995	39.1095	38.6022	40.1333	38.5919	-1.03994	0.841489	0.956792	mediator of RNA polymerase II transcription subunit 33A-like (AHRD V3.3 *** A0A2I4F330_9ROSI)
Solyc01g080240	154.781	142.902	162.755	116.056	102.735	90.7615	186.862	119.833	142.968	120.207	-1.18935	0.27724	0.693708	mitogen-activated protein kinase 13
Solyc01g080260	15.4945	5.11103	5.72645	4.72489	8.84997	10.3991	26.5334	5.73444	6.80364	10.8782	1.59888	0.204584	0.617008	ARM repeat superfamily protein (AHRD V3.3 *** A0A2U1LFG7_ARTAN)
Solyc01g080270	46.3385	30.5353	51.9927	27.9764	34.7227	37.6909	47.0795	45.7135	37.8765	40.9668	1.08159	0.648481	0.892581	Alpha/beta-Hydrolases superfamily protein (AHRD V3.3 *** A0A2U1N7S1_ARTAN)
Solyc01g080290	9.56921	14.5692	13.8979	32.2622	14.5071	5.34542	4.25056	11.8202	15.8121	7.90056	-2.00139	0.0474198	0.353206	AWPM-19-like family protein (AHRD V3.3 *** Q8LG79_ARATH)
Solyc01g080340	23.0582	21.8009	24.5735	17.4933	30.6727	30.2069	29.5602	28.7931	21.5605	29.7998	1.38215	0.025351	0.278903	BSD domain-containing protein (AHRD V3.11 *** tr|A0A1Q3B6E5|A0A1Q3B6E5_CEPFO)
Solyc01g080350	14.9423	15.1677	11.3049	13.0046	22.1754	18.0656	10.2496	16.127	13.5106	16.0416	1.18733	0.325348	0.727374	Mo25 family protein (AHRD V3.3 *** Q3E9D4_ARATH)
Solyc01g080360	10.8099	10.5321	8.07683	9.15887	11.7646	9.9019	11.2552	10.0607	9.57977	10.7169	1.1187	0.63182	0.885376	AP-5 complex subunit mu (AHRD V3.3 *** A0A2G2XRL3_CAPBA)
Solyc01g080370	75.0586	60.8545	38.0281	87.8421	106.882	63.1296	28.001	38.1018	62.4993	51.7981	-1.2066	0.549713	0.854131	Unknown protein
Solyc01g080400	34.8151	43.0528	47.1496	18.4842	35.6129	34.909	15.9394	38.8185	33.8074	29.6152	-1.14156	0.619996	0.881792	Protein phosphatase 2C family protein (AHRD V3.3 *** A0A2U1LBE2_ARTAN)
Solyc01g080410	15.394	7.95749	7.31457	14.5065	8.47671	8.7713	7.14476	6.99596	10.6775	7.80785	-1.36753	0.309206	0.717274	Peptide-methionine (R)-S-oxide reductase (AHRD V3.3 *** A0A1U8FLP0_CAPAN)
Solyc01g080430	105.739	148.414	151.205	123.278	151.164	150.234	85.4274	117.099	130.78	122.77	-1.06525	0.65866	0.897172	RING/U-box superfamily protein (AHRD V3.11 *** tr|A0A1P8B7R8|A0A1P8B7R8_ARATH)
Solyc01g080460	10.2479	20.2575	38.4395	17.503	15.23	24.3064	40.6283	60.8492	19.332	30.9297	1.59992	0.176672	0.589099	Pyruvate, phosphate dikinase (AHRD V3.3 *** A0A0M8KRU1_NICAT)
Solyc01g080480	179.383	449.05	350.461	160.518	572.08	874.932	18.1228	201.743	259.454	206.83	-1.25443	0.771226	0.936067	DNAse I-like superfamily protein (AHRD V3.3 *** A0A2U1Q9H2_ARTAN)
Solyc01g080500	224.332	295.949	275.484	216.498	357.122	374.649	214.627	227.584	250.85	284.326	1.13345	0.374508	0.759924	Plant/F10N7-170 protein, putative (AHRD V3.3 *** G7IFN2_MEDTR)
Solyc01g080510	23.7397	15.516	10.5355	11.5965	23.3943	18.7591	13.8215	16.8811	14.565	17.8883	1.22818	0.409725	0.780302	interactor of constitutive active ROPs protein (AHRD V3.3 *-* AT1G16520.1)
Solyc01g080540	29.9114	41.4999	39.8456	15.6404	30.1285	30.4579	27.4936	30.3784	29.657	29.5882	-1.00233	0.990226	0.996667	Histidine-containing phosphotransfer protein.1
Solyc01g080600	43.8835	46.1378	25.6812	24.39	14.8365	20.1525	23.0903	16.9995	33.558	18.5089	-1.81307	0.00402275	0.131166	#N/A
Solyc01g080610	12.6459	20.6005	11.1393	11.8807	20.6092	24.9506	10.1944	15.0837	13.6264	16.7689	1.23062	0.328776	0.729347	Pentatricopeptide repeat-containing protein (AHRD V3.3 *-* A0A2G3ALG8_CAPAN)
Solyc01g080620	23.9838	6.62898	13.8209	14.3948	23.0986	11.0122	11.277	17.5632	13.336	14.9818	1.12341	0.666432	0.900354	BTB/POZ domain-containing protein (AHRD V3.3 *** A0A2U1P225_ARTAN)
Solyc01g080650	8.76977	14.5504	14.8185	12.8939	13.8219	12.7986	7.43793	12.4386	12.4958	11.3107	-1.10478	0.629219	0.884751	#N/A
Solyc01g080660	37.1702	61.7066	30.6585	89.1332	90.5402	50.0855	41.7268	37.9974	50.0356	51.7822	1.03491	0.893796	0.969447	serine/arginine-rich SC35-like splicing factor SCL28 (AHRD V3.3 *-* A0A2I4G9K3_9ROSI)
Solyc01g080670	228.494	191.49	197.755	194.811	294.712	261.183	267.654	296.816	202.624	279.641	1.3801	0.000624103	0.0549845	Squamosa promoter binding protein 7
Solyc01g080690	6.71706	4.7207	6.5211	5.93465	20.848	16.9887	9.14448	10.2725	5.91869	13.5056	2.28186	0.00458615	0.137242	WD40 repeat (AHRD V3.3 *** A0A200QLR8_9MAGN)
Solyc01g080700	69.5721	45.3946	37.6352	69.3853	67.4808	47.211	59.8591	84.1496	53.589	63.2924	1.18107	0.364013	0.753336	Inosine-uridine preferring nucleoside hydrolase family protein (AHRD V3.3 *** A0A2U1NVI6_ARTAN)
Solyc01g080720	12.9506	15.4122	13.0329	9.10332	9.98391	11.7823	16.6129	20.6384	12.4051	14.1714	1.14239	0.454299	0.805954	Pentatricopeptide repeat-containing protein (AHRD V3.3 *** A0A2G2XQW8_CAPBA)
Solyc01g080740	10.1341	11.4749	15.1618	8.37857	17.5363	13.9179	10.2888	12.8171	11.0246	13.3942	1.21493	0.251006	0.66998	Unknown protein
Solyc01g080750	89.2709	107.57	132.952	101.391	86.1593	102.272	57.3124	72.6299	106.665	77.8226	-1.37062	0.0680838	0.409265	ARM repeat superfamily protein (AHRD V3.3 *** A0A2U1P293_ARTAN)
Solyc01g080760	55.4477	66.0795	38.9762	42.3291	44.6019	31.9307	48.6198	37.7535	49.5847	40.2099	-1.23315	0.194156	0.606801	ABC subfamily C protein (AHRD V3.3 *-* AT4G15820.1)
Solyc01g080770	42.224	15.0559	31.6277	27.3107	25.4201	16.2739	28.4677	42.5505	27.2218	26.6061	-1.02314	0.926731	0.979221	Leucine-rich receptor-like protein kinase family protein (AHRD V3.3 *** A0A061DVS1_THECC)
Solyc01g080790	16.4425	13.1457	10.0884	21.117	16.3398	10.6501	12.0684	11.9623	14.6488	12.5897	-1.16355	0.401224	0.776755	Plant basic secretory protein (BSP) family protein (AHRD V3.3 *** I3SK49_MEDTR)
Solyc01g080810	40.1203	37.1524	16.6093	26.45	27.075	18.845	30.2123	28.8602	28.4467	25.8263	-1.10146	0.627569	0.884076	Isoleucine--tRNA ligase (AHRD V3.3 *** A0A1J3CFD6_NOCCA)
Solyc01g080820	6.57481	10.1998	18.3393	9.58942	9.49538	12.2249	4.84012	7.72761	10.4211	8.11735	-1.2838	0.321418	0.724879	similar to RCD one 3 (AHRD V3.3 --* AT1G70440.2)
Solyc01g080830	20.6647	18.612	10.5395	16.976	9.4812	15.3639	16.434	22.7647	16.1964	15.2789	-1.06005	0.786769	0.941442	Ribosomal L7Ae/L30e/S12e/Gadd45 family protein (AHRD V3.3 *** A0A2K3L785_TRIPR)
Solyc01g080840	34.0793	24.5203	44.3409	41.5153	26.0536	23.8917	30.3491	23.4415	35.2174	25.7965	-1.3652	0.145817	0.550845	Protein translocase subunit SecA (AHRD V3.3 *** A0A2G3DHH8_CAPCH)
Solyc01g080930	159.169	149.565	130.003	145.095	89.1713	133.216	157.912	107.102	145.571	119.055	-1.22272	0.136976	0.537839	3-hydroxyisobutyryl-CoA hydrolase.1
Solyc01g080940	28.167	32.2546	25.7555	25.7502	27.9551	24.5926	33.6901	32.6274	27.8609	29.4841	1.05826	0.649228	0.893002	5-hydroxyisourate hydrolase (AHRD V3.3 *** S8EER2_9LAMI)
Solyc01g081010	98.9829	68.4454	97.8723	99.3945	75.3721	98.8956	143.065	137.587	90.1014	110.059	1.2215	0.190415	0.602669	Nucleolar GTP-binding protein.1
Solyc01g081030	123.627	88.438	132.996	127.037	118.499	78.7919	85.6796	121.381	116.582	99.2672	-1.17442	0.226287	0.643104	protein SCAI homolog (AHRD V3.3 *** A0A2I4HT97_9ROSI)
Solyc01g081050	30.1347	73.5289	62.474	13.0449	55.6983	54.8254	8.3646	18.8646	36.6578	26.3469	-1.39135	0.480405	0.818604	AMP-dependent synthetase/ligase (AHRD V3.3 *** A0A200PXA7_9MAGN)
Solyc01g081060	12.6815	9.49014	11.8786	9.8915	4.18719	8.17425	27.6475	9.90397	10.9048	9.83918	-1.1083	0.746238	0.927923	#N/A
Solyc01g081070	54.4109	43.9484	30.6082	18.6534	33.6905	31.3662	27.762	55.7954	34.1827	35.7688	1.0464	0.836785	0.955516	Protein transport protein SEC23 (AHRD V3.3 *** A0A2G3ALY9_CAPAN)
Solyc01g081090	23.4845	30.805	13.0802	15.5509	24.0981	18.9916	15.0405	15.072	19.5859	17.9471	-1.09131	0.744804	0.927161	bHLH transcription factor 003
Solyc01g081100	21.5978	27.4957	17.7061	21.7467	30.7612	26.7021	14.8078	23.5037	21.8674	23.123	1.05742	0.802716	0.945204	#N/A
Solyc01g081290	6.56331	7.52189	8.65702	5.16615	4.80694	16.8517	5.38033	3.10875	6.85483	6.06704	-1.12985	0.804375	0.946232	Pentatricopeptide repeat-containing protein (AHRD V3.3 *** A0A2G3ALT8_CAPAN)
Solyc01g081300	34.4373	33.4014	18.3464	19.3463	16.8404	14.7944	11.3021	17.1609	25.2776	14.8264	-1.7049	0.0406486	0.332212	Phosphoribosylaminoimidazole-succinocarboxamide synthase (AHRD V3.11 *** tr|A0A2G3DIS8|A0A2G3DIS8_CAPCH)
Solyc01g081330	56.4296	43.0425	30.9038	37.3477	51.3257	61.7877	39.5278	24.1953	40.9185	41.7318	1.01988	0.923924	0.979221	Chaperone protein DnaJ (AHRD V3.3 *** A0A2U1QKJ2_ARTAN)
Solyc01g081380	34.0786	45.1874	47.3761	39.868	44.6679	61.6378	34.3821	56.9808	41.2972	48.1921	1.16696	0.360665	0.75119	AUGMIN subunit 7 (AHRD V3.11 *** tr|A0A2G3ALR7|A0A2G3ALR7_CAPAN)
Solyc01g081410	12.9821	15.326	4.55728	11.9878	16.3394	27.037	22.1183	18.8015	10.2107	20.7031	2.02759	0.0598185	0.387909	Major facilitator superfamily protein (AHRD V3.3 *** F4KD53_ARATH)
Solyc01g081420	211.965	261.537	261.046	207.367	255.151	324.249	131.24	205.397	234.053	217.312	-1.07703	0.651386	0.894842	Armadillo-type fold (AHRD V3.3 *-* A0A2U1LY20_ARTAN)
Solyc01g081430	135.817	131.467	139.829	87.8281	89.5576	257.015	52.5187	145.649	121.689	115.192	-1.0564	0.839684	0.956	Armadillo-type fold (AHRD V3.3 *** A0A2U1LXZ4_ARTAN)
Solyc01g081440	34.8618	21.1387	25.3101	43.461	23.6818	19.012	19.9869	17.6853	30.0058	19.9733	-1.50229	0.0439149	0.342867	DUF1005 domain-containing protein (AHRD V3.3 *** A0A1Q3BB96_CEPFO)
Solyc01g081450	73.981	87.5455	57.1933	75.1722	134.043	117.853	52.0434	69.8912	72.6422	87.065	1.19855	0.352341	0.746839	glycine-rich protein A3 (AHRD V3.3 --* XP_004229538.1)
Solyc01g081460	9.41144	22.814	16.0526	15.7711	13.5233	15.2742	14.8555	16.5195	15.2692	15.0048	-1.01762	0.934231	0.982654	tRNA (Guanine-N-7) methyltransferase (AHRD V3.3 *** A0A200R6M4_9MAGN)
Solyc01g081490	14.7182	9.62936	16.0741	17.4025	17.4348	16.5125	23.7067	10.684	14.1107	16.4327	1.16456	0.429881	0.792036	RNA polymerase sigma factor (AHRD V3.3 *** A0A1U8EM77_CAPAN)
Solyc01g081510	16.0923	13.6508	15.1349	16.9696	11.3957	9.74689	9.3476	13.4597	15.4119	10.8727	-1.41749	0.023484	0.272172	2-hydroxy-3-oxopropionate reductase (AHRD V3.11 *** tr|A0A2Z5T525|A0A2Z5T525_9BACI)
Solyc01g081520	69.2957	66.6852	110.4	57.3008	65.5903	47.6071	52.0928	49.6831	73.5303	53.3181	-1.37909	0.0510147	0.365119	UTP--glucose-1-phosphate uridylyltransferase-like (AHRD V3.3 *** A0A2I4HSM6_9ROSI)
Solyc01g081540	10.6517	6.36508	6.43452	8.67421	5.86564	7.45641	8.02595	4.83304	7.84318	6.41786	-1.22209	0.333799	0.732819	Myosin-17 (AHRD V3.3 *** A0A2G3ALU8_CAPAN)
Solyc01g081570	80.6529	68.446	66.0221	74.6324	71.0076	98.2693	52.6338	51.5835	72.2181	65.9743	-1.09464	0.582411	0.870409	DUF239 domain-containing protein/DUF4409 domain-containing protein (AHRD V3.3 *** A0A1Q3BKR6_CEPFO)
Solyc01g081610	396.848	189.569	210.433	252.57	173.695	179.244	596.411	200.46	251.462	247.003	-1.01805	0.944657	0.984373	Beta-hexosaminidase (AHRD V3.3 *** A0A2G2XRM6_CAPBA)
Solyc01g081620	6.93379	3.86559	4.37784	6.60094	4.4632	4.95975	40.8636	4.35935	5.27549	7.92439	1.50211	0.431003	0.792368	Vacuolar protein sorting-associated protein 62 (AHRD V3.3 *** A0A200RA51_9MAGN)
Solyc01g086640	25.334	27.1921	15.4667	31.8957	10.2004	8.38369	23.9102	15.9271	24.1445	13.4336	-1.79732	0.0351317	0.318985	O-fucosyltransferase (AHRD V3.3 *** A0A2P5FQR3_TREOI)
Solyc01g086690	33.8352	43.4695	23.9807	20.9324	38.4571	49.0284	10.8638	34.3276	29.3129	28.9576	-1.01227	0.966843	0.990379	Sister chromatid cohesion.1
Solyc01g086710	26.1587	34.8855	21.9376	37.4966	23.3099	18.1682	29.7195	21.0617	29.4347	22.6907	-1.29722	0.20586	0.618074	DNA-directed RNA polymerase subunit beta (AHRD V3.3 *** A0A2G3AK33_CAPAN)
Solyc01g086740	123.677	85.078	108.681	115.85	102.672	80.3992	98.398	102.161	107.285	95.4429	-1.12407	0.355763	0.748357	Chaperone protein dnaJ (AHRD V3.3 *** B6TA99_MAIZE)
Solyc01g086750	687.178	649.15	731.109	744.609	554.227	486.499	806.66	551.974	701.99	588.633	-1.19258	0.108287	0.488515	Clustered mitochondria protein (AHRD V3.11 *** tr|A0A2G3DGP3|A0A2G3DGP3_CAPCH)
Solyc01g086830	295.481	520.053	480.329	312.787	514.644	597.215	267.197	426.335	389.8	432.569	1.10972	0.59476	0.874533	Bifunctional inhibitor/lipid-transfer protein/seed storage 2S albumin superfamily protein (AHRD V3.3 *** A0A2U1N9B3_ARTAN)
Solyc01g086850	67.4604	141.305	97.9482	96.5917	167.553	194.619	39.7253	88.5381	97.4508	103.487	1.06194	0.863488	0.961639	Ras gtpase (AHRD V3.3 *** A0A1J9QT15_9PEZI)
Solyc01g086890	225.607	282.538	317.759	207.308	358.335	363.459	352.226	352.989	254.557	356.723	1.40135	0.0082759	0.174647	G-patch domain-containing protein/Surp domain-containing protein (AHRD V3.3 *** A0A1Q3BXL6_CEPFO)
Solyc01g086930	35.7306	29.0656	16.7176	14.4404	14.6906	15.7208	24.2046	16.423	22.3765	17.4067	-1.28551	0.335685	0.734483	protein gamma response.1
Solyc01g086940	86.7774	60.2803	70.8679	49.0329	70.7156	84.4356	78.4694	72.6656	65.295	76.3867	1.16987	0.319901	0.724111	Zinc finger CCCH domain-containing protein (AHRD V3.3 *-* A0A2K3NPU7_TRIPR)
Solyc01g086990	61.5522	79.9651	46.3838	54.3405	41.1857	69.8251	48.7608	73.7333	59.3483	56.7052	-1.04661	0.796534	0.943839	Pre-mRNA-splicing factor SY.1
Solyc01g087030	71.2083	70.2811	43.9814	29.39	83.6708	62.6234	32.4457	88.0696	50.4324	62.2048	1.23343	0.421977	0.787706	Zinc finger transcription factor 10
Solyc01g087040	14.7022	9.35112	12.2228	13.9948	12.0419	10.0143	10.4295	11.7156	12.3836	11.0176	-1.12399	0.428184	0.791297	Photosystem II PsbP (AHRD V3.3 *** A0A200Q959_9MAGN)
Solyc01g087060	11.9187	5.19449	12.2955	5.64251	37.4823	40.5574	14.4992	21.9437	8.09558	26.3716	3.25754	0.0281007	0.289856	RING/U-box superfamily protein (AHRD V3.3 *** A0A2U1NQN4_ARTAN)
Solyc01g087070	163.003	129.325	76.2648	100.581	261.509	155.473	77.6318	109.448	112.766	136.332	1.20898	0.44758	0.801667	ADP,ATP carrier protein, mitochondrial (AHRD V3.3 *** A0A2U1N934_ARTAN)
Solyc01g087080	15.0289	26.7989	8.81958	5.36305	9.78052	29.5425	9.52879	8.06436	11.7483	12.2069	1.03903	0.913409	0.97548	#N/A
Solyc01g087090	42.0858	47.1338	45.355	32.0129	41.4209	44.7219	25.4492	43.8659	41.1959	37.9215	-1.08635	0.640188	0.887667	Unknown protein
Solyc01g087140	10.3734	12.6208	12.9608	5.80073	7.8822	8.94158	9.85196	15.8624	9.9605	10.2444	1.02851	0.901576	0.9717	Late embryogenesis abundant protein (AHRD V3.11 *-* tr|A0A200QZY3|A0A200QZY3_9MAGN)
Solyc01g087150	32.595	28.2729	20.542	20.0534	21.8957	11.945	21.2872	18.8983	24.8221	18.0103	-1.37821	0.0792938	0.434816	Protein DETOXIFICATION (AHRD V3.3 *** A0A328DUA2_9ASTE)
Solyc01g087170	333.423	271.798	394.715	247.715	161.048	279.215	245.882	234.048	306.81	225.544	-1.36031	0.0576997	0.38299	Zinc finger transcription factor 11
Solyc01g087190	34.7535	47.523	29.4116	32.6396	54.5761	38.7744	14.4992	29.3784	35.4847	30.8127	-1.15163	0.582836	0.870409	Chaperonin-like RbcX (AHRD V3.3 *** A0A200R9J6_9MAGN)
Solyc01g087200	8.01769	9.67696	3.2659	8.12453	10.792	6.40865	7.68964	16.937	6.73593	9.74209	1.44629	0.221501	0.636381	Disease resistance protein (AHRD V3.3 *** A0A2U1Q201_ARTAN)
Solyc01g087240	14.3501	19.0803	14.1975	27.6068	21.1108	12.6608	30.8078	26.3263	18.0995	21.5777	1.19217	0.437484	0.795085	Nuclear transcription factor Y subunit A-9 (AHRD V3.3 *** A0A1U8DTI1_CAPAN)
Solyc01g087250	29.801	18.6206	30.4549	16.4688	22.5365	20.0171	32.0486	42.9848	22.9687	28.0771	1.22241	0.351304	0.746191	carotenoid cleavage dioxygenase 1A
Solyc01g087260	237.939	297.567	249.11	280.183	376.121	371.331	197.349	303.84	265.137	302.512	1.14096	0.35502	0.747927	#N/A
Solyc01g087280	3.44579	5.65644	58.7151	4.57272	14.0474	11.7823	5.60237	3.93216	8.50529	7.77065	-1.09454	0.865116	0.962465	Pectin lyase-like superfamily protein (AHRD V3.11 *** tr|A0A2U1LRJ2|A0A2U1LRJ2_ARTAN)
Solyc01g087290	16.7288	17.7605	14.7858	21.0092	11.6389	18.2097	6.45816	22.8011	17.4299	13.2914	-1.31136	0.31211	0.719327	tRNA-dihydrouridine synthase (AHRD V3.3 *** A0A2G3DGY4_CAPCH)
Solyc01g087310	12.4943	12.3546	17.0164	3.86523	14.035	17.0159	15.5453	9.74726	10.038	13.7923	1.37402	0.279868	0.694792	#N/A
Solyc01g087340	17.7049	35.4767	28.5859	35.3715	39.9907	12.0894	11.6415	22.2012	28.23	18.8013	-1.50149	0.16533	0.577399	tRNA-dihydrouridine synthase (AHRD V3.3 *-* A0A2G3AKC9_CAPAN)
Solyc01g087350	117.024	102.002	101.299	136.024	61.8535	101.715	91.6431	51.4656	113.247	73.806	-1.53439	0.0104078	0.192142	Unknown protein
Solyc01g087370	20.5252	26.2806	14.0697	13.3307	19.5774	17.7239	21.3113	25.6526	17.8347	20.8696	1.17017	0.387968	0.76953	RING/FYVE/PHD-type zinc finger family protein (AHRD V3.3 *-* A0A2U1QBS4_ARTAN)
Solyc01g087380	15.4464	14.0966	17.5045	14.0285	23.7656	16.7978	7.79804	7.36773	15.2064	12.3064	-1.23565	0.408735	0.77989	#N/A
Solyc01g087390	45.9045	51.1531	57.2533	36.1066	41.3684	57.4788	54.8888	36.7192	46.9384	46.7884	-1.00321	0.981816	0.994783	RING/FYVE/PHD-type zinc finger family protein (AHRD V3.3 *-* A0A178V841_ARATH)
Solyc01g087420	30.0477	23.7286	23.0505	27.7921	27.9677	8.86502	32.3157	35.6117	25.9969	23.1119	-1.12483	0.709887	0.91529	Zinc finger, FYVE/PHD-type (AHRD V3.3 *** A0A2U1NX02_ARTAN)
Solyc01g087430	217.548	174.465	203.882	523.548	271.798	227.215	312.215	181.298	252.29	243.155	-1.03757	0.857042	0.960436	Zinc finger, FYVE/PHD-type (AHRD V3.3 *** A0A2U1NX02_ARTAN)
Solyc01g087440	29.6028	50.4613	46.1966	28.2595	36.794	39.6993	26.8155	20.1533	37.3694	29.8073	-1.2537	0.340206	0.739468	#N/A
Solyc01g087450	26.2774	51.7867	69.7082	14.2254	19.5021	12.4798	16.2313	17.4343	34.0829	16.1999	-2.1039	0.0272237	0.286917	Arm repeat superfamily protein (AHRD V3.3 *** A0A2K3NMK6_TRIPR)
Solyc01g087480	128.971	121.429	69.548	143.556	111.884	133.611	145.845	75.9282	111.823	113.429	1.01437	0.937386	0.98334	#N/A
Solyc01g087490	50.8745	57.1777	49.8237	40.3536	38.6116	54.6194	58.0931	59.5402	49.1769	51.9696	1.05679	0.725076	0.918812	Protein OBERON (AHRD V3.3 *** A0A200R9K2_9MAGN)
Solyc01g087500	112.262	104.513	108.067	81.5687	80.8651	109.858	50.1288	76.2008	100.845	76.3238	-1.32128	0.104689	0.480262	DNA topoisomerase 2 (AHRD V3.3 *** A0A2G2XSS9_CAPBA)
Solyc01g087530	51.7077	45.0485	35.0521	36.9842	40.0347	39.0254	51.5674	45.0681	41.6861	43.6523	1.04717	0.729371	0.919937	Zinc transporter (AHRD V3.3 *** A0A2K3NPL0_TRIPR)
Solyc01g087540	199.339	142.669	172.141	160.152	67.8739	59.5348	113.444	100.423	167.334	82.3706	-2.03148	0.000683007	0.0574796	DUF642 domain-containing protein (AHRD V3.11 *** tr|A0A1Q3AUQ6|A0A1Q3AUQ6_CEPFO)
Solyc01g087550	42.6817	54.7256	28.9956	47.1027	52.4654	31.7681	24.7995	40.8161	42.2622	36.04	-1.17265	0.369437	0.75693	Cytochrome b5 domain-containing protein RLF (AHRD V3.3 *** A0A2G3AK95_CAPAN)
Solyc01g087560	93.4664	94.766	86.7044	60.1023	69.3467	124.312	98.6026	108.279	82.4252	97.9473	1.18832	0.507468	0.831435	Methyltransferase (AHRD V3.3 *** A0A2G2XST8_CAPBA)
Solyc01g087570	57.8112	71.9635	66.7151	58.6551	39.0608	43.2121	41.6263	31.2456	63.5204	38.4924	-1.65021	0.000485465	0.051594	hypothetical protein (AHRD V3.3 *-* AT3G57450.1)
Solyc01g087600	43.453	37.5979	33.48	46.7233	39.2713	22.9759	20.4451	32.9864	39.983	27.9298	-1.43155	0.056404	0.379386	transmembrane protein%2C putative (DUF288) (AHRD V3.3 *** AT2G41770.1)
Solyc01g087610	85.3188	45.4529	46.4534	47.2156	31.6997	40.2236	21.6967	43.4681	54.0042	33.115	-1.63081	0.0192961	0.247838	Alpha-N-acetylglucosaminidase (AHRD V3.3 *** Q9ZR45_TOBAC)
Solyc01g087620	278.584	287.938	213.362	214.46	295.025	290.138	204.352	242.056	246.139	255.088	1.03636	0.737222	0.922955	Ubiquitin-like protein 5 (AHRD V3.3 *** A0A1U8DUI9_CAPAN)
Solyc01g087640	6.75866	8.59928	12.6483	9.91007	7.24498	5.1151	9.37849	15.5514	9.23864	8.5743	-1.07748	0.748858	0.929129	alcohol dehydrogenase
Solyc01g087660	9.64435	7.43874	21.8479	11.5982	15.0125	24.1843	17.8932	17.8159	11.6116	18.4447	1.58846	0.0411814	0.332417	Unknown protein
Solyc01g087670	43.8272	32.5057	28.7407	33.2733	12.6424	25.1752	42.071	33.5807	34.1644	25.8952	-1.31934	0.348727	0.745318	WD40 repeat (AHRD V3.3 *** A0A200Q3A4_9MAGN)
Solyc01g087740	11.1197	9.10148	12.3182	11.7369	16.1563	14.0801	15.734	11.9391	10.9983	14.3777	1.30726	0.120048	0.512214	Subtilisin-like protease (AHRD V3.3 *** O82777_SOLLC)
Solyc01g087770	18.2335	24.6024	25.7075	24.0689	11.3326	21.5022	16.2338	20.5334	22.9531	16.882	-1.35962	0.0924685	0.461401	Subtilisin-like protease (AHRD V3.3 *** O82777_SOLLC)
Solyc01g087810	12.0801	8.90568	15.2971	9.98509	8.34788	9.22986	7.6933	11.7935	11.322	9.14391	-1.23821	0.243229	0.661514	Subtilisin-like protease (AHRD V3.3 *** O82777_SOLLC)
Solyc01g087850	13.9209	15.5003	16.7251	11.2435	28.8298	18.1841	10.5556	13.2578	14.1928	16.4578	1.15958	0.459519	0.808901	serine protease SBT3
Solyc01g087870	32.2946	23.8483	19.6215	36.6143	9.50434	16.0266	24.7995	17.2556	27.2736	15.9784	-1.7069	0.0356192	0.321406	Glutamine--fructose-6-phosphate aminotransferase [isomerizing] (AHRD V3.11 *** tr|A0A2I0VLF2|A0A2I0VLF2_9ASPA)
Solyc01g087880	14.6521	13.2754	16.6472	13.5835	10.4904	11.1243	14.7654	10.1021	14.4819	11.4863	-1.2608	0.124553	0.517878	2%2C3-bisphosphoglycerate-dependent phosphoglycerate mutase (AHRD V3.3 *** AT3G52040.1)
Solyc01g087890	27.3736	16.7345	16.3979	25.6421	23.6298	30.2918	27.4235	20.4116	20.9494	25.1592	1.20095	0.290675	0.699993	Plasma-membrane choline transporter family protein (AHRD V3.3 *** F4K425_ARATH)
Solyc01g087910	22.7975	14.488	17.9724	16.751	14.8904	14.3143	19.1521	20.4144	17.7576	16.9906	-1.04515	0.754575	0.932265	F-box/WD-40 repeat-containing protein (AHRD V3.11 *** tr|A0A1J3H907|A0A1J3H907_NOCCA)
Solyc01g087980	28.5618	45.5892	32.434	37.0105	38.5886	40.4185	17.6668	24.2538	35.3584	28.592	-1.23666	0.449875	0.803617	#N/A
Solyc01g087990	64.2249	27.7023	34.5764	43.1627	28.1821	25.9347	38.3173	76.3186	40.367	38.2358	-1.05574	0.830559	0.954144	MADS-box transcription factor (AHRD V3.3 *** Q75V01_9ASPA)
Solyc01g088000	13.0399	18.0781	12.3391	25.7781	27.5613	21.0705	18.3817	22.2627	16.5478	22.0793	1.33427	0.164263	0.574922	S-adenosyl-L-methionine-dependent methyltransferases superfamily protein (AHRD V3.3 *** Q8RXT8_ARATH)
Solyc01g088050	12.4405	22.1297	15.9782	14.8395	36.9325	51.9705	19.5269	24.0267	15.9842	30.8052	1.92723	0.00847032	0.17694	Serine/threonine-protein kinase-like protein (AHRD V3.3 *** A0A2G2XQK9_CAPBA)
Solyc01g088090	15.6659	16.1051	14.0404	11.4609	10.0003	8.55586	34.973	14.0852	14.1948	14.3283	1.0094	0.973751	0.992055	Pheophytinase, chloroplastic (AHRD V3.3 *** A0A2G3C5T3_CAPCH)
Solyc01g088130	10.8337	10.5401	9.93393	12.1689	9.96232	7.14418	11.4632	13.689	10.8392	10.2801	-1.05439	0.733291	0.920655	#N/A
Solyc01g088140	15.8221	28.8736	12.7311	12.5722	13.9813	17.5044	13.0678	20.0579	16.4441	15.9146	-1.03327	0.866229	0.962694	hypothetical protein (AHRD V3.3 *-* AT5G13470.1)
Solyc01g088150	37.075	64.6299	82.9692	52.7351	61.948	91.7217	42.7009	64.6578	56.9027	62.9346	1.106	0.622068	0.882419	Glycerol-3-phosphate dehydrogenase [NAD(+)] (AHRD V3.3 *** A0A1U8F7U7_CAPAN)
Solyc01g088170	23.0079	19.87	31.5033	17.6934	15.2283	11.2359	16.8415	11.2212	22.4678	13.4097	-1.67548	0.00754638	0.167395	aldehyde oxidase 2
Solyc01g088240	20.3586	28.6146	21.1319	27.2721	15.5851	21.4831	26.0269	26.4659	24.0712	21.9144	-1.09842	0.536394	0.845175	F-box protein FBW2 (AHRD V3.11 *** tr|A0A2I0XBZ1|A0A2I0XBZ1_9ASPA)
Solyc01g088250	38.8144	33.8589	26.9916	37.0063	34.914	41.2861	78.0757	48.1189	33.8488	48.2402	1.42517	0.0595689	0.387909	SUN domain protein3
Solyc01g088340	7.00564	18.1377	8.42803	3.78532	7.1107	11.7216	15.5068	6.33175	7.9793	9.51124	1.19199	0.588987	0.872474	Unknown protein
Solyc01g088380	41.5727	40.1155	45.2134	49.6516	31.1751	30.5282	45.8188	40.1582	43.9876	36.3774	-1.2092	0.249825	0.668883	DNA replication helicase (AHRD V3.3 *** A0A2U1N8T9_ARTAN)
Solyc01g088400	685.562	719.828	764.508	807.29	476.358	676.053	780.289	557.922	742.885	611.907	-1.21405	0.0883547	0.451257	ECERIFERUM 1
Solyc01g088430	1137.91	526.062	435.001	153.995	209.275	79.9325	1658.63	1287.61	447.492	434.755	-1.0293	0.961839	0.988922	Fatty acid hydroxylase superfamily (AHRD V3.3 *** A0A2U1L8N4_ARTAN)
Solyc01g088440	13.0601	13.4431	12.4782	17.8734	13.5525	15.5534	9.92434	11.8146	14.067	12.5384	-1.12192	0.456374	0.807426	RING/U-box superfamily protein (AHRD V3.3 *-* A0A2U1LDD8_ARTAN)
Solyc01g088480	12.3039	8.75064	19.9216	6.71418	11.2869	7.34029	5.23529	10.1728	10.9547	8.15018	-1.3441	0.252274	0.671081	UMP-CMP kinase (AHRD V3.3 *** A0A2G2XT48_CAPBA),Pfam:PF00406
Solyc01g088550	45.5346	48.3081	42.1023	45.8643	37.5572	26.918	45.8069	48.3177	45.3979	38.6761	-1.1738	0.236873	0.654868	Purine permease (AHRD V3.3 *** A0A2P5FPT3_TREOI),Pfam:PF16913
Solyc01g088560	58.2182	58.6613	44.9958	41.7834	41.159	35.8016	53.6462	46.4899	50.3381	43.7841	-1.14969	0.346036	0.743711	Rab family GTPase (AHRD V3.3 *** A0A1Y1IFP9_KLENI)
Solyc01g088590	15.7939	15.0793	11.3793	12.4961	11.4259	14.085	14.8208	12.528	13.5656	13.1477	-1.03179	0.834439	0.95501	Pectinesterase inhibitor (AHRD V3.11 *** tr|A0A2U1KTC1|A0A2U1KTC1_ARTAN)
Solyc01g088600	15.2543	16.0169	15.6037	25.6019	11.1905	12.3874	15.3384	16.8138	17.6753	13.7505	-1.28543	0.210705	0.62431	protein TRIGALACTOSYLDIACYLGLYCEROL 4, chloroplastic (AHRD V3.11 *** tr|A0A2I4EI43|A0A2I4EI43_9ROSI)
Solyc01g088620	50.7808	51.1413	55.1835	64.3008	31.7978	43.7522	36.827	36.6076	55.0965	37.007	-1.48881	0.00380213	0.128373	Ferredoxin-like protein (AHRD V3.3 *** Q8GYG8_ARATH)
Solyc01g088630	27.2681	34.1507	31.4463	29.3861	45.6347	38.3156	19.5982	21.4586	30.4573	29.2834	-1.04009	0.845679	0.957502	RING/U-box superfamily protein (AHRD V3.3 *-* A0A2U1N3Q0_ARTAN)
Solyc01g088640	11.4456	11.4329	5.86644	11.3738	7.51893	9.87875	7.43685	13.1701	9.66649	9.23547	-1.04667	0.838262	0.955609	E3 ubiquitin ligase BIG BROTHER-related-like (AHRD V3.3 *-* A0A2I4HNQ7_9ROSI)
Solyc01g088650	50.6186	14.7393	45.2043	40.349	18.7955	26.7512	26.5151	25.2501	34.1547	24.0873	-1.41795	0.176223	0.588154	Alpha-1,3-glucosyltransferase (AHRD V3.3 *** A0A2G3DIZ7_CAPCH)
Solyc01g088690	29.8256	39.402	29.4672	24.6897	32.8036	36.4478	23.8599	22.7296	30.4082	28.3768	-1.07159	0.636536	0.885762	Protein kinase superfamily protein (AHRD V3.3 *** A0A2U1KAY9_ARTAN)
Solyc01g088720	64.6113	100.149	68.0061	80.5952	82.3508	73.7968	87.8049	89.0795	77.1707	83.033	1.07596	0.50087	0.828536	Transcription factor IIIB 90 kDa subunit (AHRD V3.3 *** A0A2G2XT56_CAPBA)
Solyc01g088730	9.53496	20.8949	8.33784	27.8452	11.6937	10.7335	18.4025	22.2562	14.6653	15.0576	1.02675	0.929344	0.980046	DnaJ domain-containing protein (AHRD V3.3 *** A0A2U1Q731_ARTAN)
Solyc01g088740	81.1896	111.378	74.844	64.679	50.0961	62.3937	95.3161	82.4538	81.3402	70.4012	-1.15538	0.396148	0.774345	Casein kinase II subunit beta (AHRD V3.3 *** A0A328DKK1_9ASTE)
Solyc01g088760	6.56331	7.11735	11.2012	4.49083	6.19626	7.19528	15.252	17.2666	6.96239	10.4095	1.4951	0.187107	0.600399	Cytochrome P450 (AHRD V3.11 *** tr|A0A200RC30|A0A200RC30_9MAGN)
Solyc01g088780	24.9856	38.0201	25.0047	37.9029	38.4742	52.2974	14.5687	38.2923	30.8034	32.5496	1.05669	0.843978	0.957321	Rac-like GTP binding protein (AHRD V3.3 *** Q9S821_PHYPA)
Solyc01g088790	56.6796	270.845	204.888	145.965	104.454	28.3857	87.8773	119.682	146.379	74.7278	-1.95883	0.100101	0.473284	Nucleotide-diphospho-sugar transferase (AHRD V3.11 *** tr|A0A2U1NTE6|A0A2U1NTE6_ARTAN)
Solyc01g088800	82.4651	65.2984	76.2888	102.992	121.075	92.1838	110.798	100.04	80.6509	105.464	1.30766	0.0326969	0.307149	RNA binding protein (AHRD V3.3 *-* A0A2K3MUE2_TRIPR)
Solyc01g089850	41.6474	37.9061	33.5135	14.9536	47.7245	37.1683	24.8848	28.8197	29.824	33.5842	1.12608	0.61497	0.879899	#N/A
Solyc01g089870	73.3011	57.0724	45.673	48.3319	41.5401	52.1518	42.6499	33.1214	55.1261	41.8255	-1.318	0.0805646	0.436243	Pentatricopeptide repeat-containing protein (AHRD V3.3 *** A0A1U8F0K6_CAPAN)
Solyc01g089900	243.506	229.514	226.043	326.49	346.23	181.203	298.088	334.095	253.423	281.149	1.10941	0.463239	0.810919	Mannosyltransferase (AHRD V3.3 *** A0A1U8EDJ7_CAPAN)
Solyc01g089920	118.775	261.183	225.346	137.615	220.057	229.36	11.7526	96.5492	176.115	86.993	-2.02447	0.284268	0.6981	Bax inhibitor.1
Solyc01g089930	47.1098	79.6093	70.6031	41.7143	40.4422	37.532	25.2832	29.7227	57.6496	32.6806	-1.76403	0.0189413	0.246084	Riboflavin biosynthesis protein PYRR, chloroplastic (AHRD V3.3 *-* A0A1U8G2K3_CAPAN)
Solyc01g089970	52.1561	50.6282	70.7925	46.9793	28.3592	34.4649	49.2129	32.0718	54.4375	35.2426	-1.54465	0.0134227	0.215931	Nucleoside diphosphate kinase (AHRD V3.3 *** A0A1U8EKT2_CAPAN)
Solyc01g090000	7.8628	19.2664	21.4851	7.90148	16.5598	8.65702	6.74428	4.13906	12.6636	7.95362	-1.59217	0.169649	0.583183	Bax inhibitor.1
Solyc01g090010	28.5671	49.3836	49.5501	9.94064	7.88185	9.64593	5.25026	9.08865	28.872	7.76092	-3.72018	0.00285967	0.115586	Bax inhibitor.1
Solyc01g090030	93.8698	161.398	142.699	87.2194	194.622	200.559	7.50681	105.543	117.183	74.5728	-1.57139	0.476535	0.816452	Bax inhibitor.1
Solyc01g090040	75.1062	79.5374	100.592	74.6919	100.487	134.942	46.1106	84.3324	81.8504	85.2144	1.0411	0.841077	0.956517	Riboflavin biosynthesis protein PYRR, chloroplastic (AHRD V3.11 *-* tr|A0A2U1MA17|A0A2U1MA17_ARTAN)
Solyc01g090050	9.54821	21.4313	7.51451	13.248	14.9233	12.6132	10.4677	10.2209	11.9469	11.9126	-1.00288	0.989807	0.996667	bax inhibitor 1-like isoform X2 (AHRD V3.3 *-* XP_025887342.1)
Solyc01g090070	16.2532	47.5219	40.3464	30.1288	57.996	62.7475	9.74258	23.7354	31.1283	30.2877	-1.02775	0.958193	0.987951	BAX inhibitor.1
Solyc01g090080	71.7686	160.89	83.7273	82.6467	178.967	139.864	12.2955	66.8304	94.5451	67.3442	-1.40391	0.574096	0.865751	Bax inhibitor.1
Solyc01g090090	31.3457	58.3019	40.724	19.235	48.4588	50.2159	9.28527	9.86518	34.5901	21.7284	-1.59193	0.373046	0.759084	Bax inhibitor.1
Solyc01g090110	138.048	285.298	298.022	166.539	349.048	342.927	27.1622	186.215	210.268	156.862	-1.34047	0.640447	0.887808	Bax inhibitor.1
Solyc01g090120	8.08549	8.75143	12.1816	8.97983	9.26189	17.0368	19.694	12.909	9.37972	14.1524	1.50882	0.0324315	0.305539	Uclacyanin-3 (AHRD V3.3 *** A0A1U8ED46_CAPAN)
Solyc01g090160	6.98228	5.19449	20.7479	19.5636	7.3992	3.76674	11.8546	2.65469	11.0152	5.44206	-2.02408	0.110654	0.494765	#N/A
Solyc01g090180	96.1715	101.53	96.5909	89.8702	185.294	159.116	131.024	122.014	95.9507	147.345	1.53563	0.00237431	0.10583	4,5-DOPA dioxygenase extradiol (AHRD V3.11 *** tr|A0A1U8ED16|A0A1U8ED16_CAPAN)
Solyc01g090200	58.4406	74.4075	63.5545	63.5826	108.136	124.089	41.5751	92.6312	64.7447	84.7859	1.30954	0.217494	0.633767	Glycine-tRNA ligase (AHRD V3.11 *** tr|A0A2U1L4F3|A0A2U1L4F3_ARTAN)
Solyc01g090230	84.3295	67.1997	120.018	44.0276	76.5522	100.352	71.7141	85.7483	73.9741	82.9045	1.12072	0.544086	0.850991	GRAM domain family protein (AHRD V3.3 *** A0A2U1KYE4_ARTAN)
Solyc01g090240	61.9876	61.5403	55.073	67.6593	44.179	51.5721	56.5635	38.9691	61.402	47.3393	-1.29706	0.0554633	0.376104	AvrPto-dependent Pto-interacting protein 3
Solyc01g090250	16.1783	12.7581	36.1936	21.1702	27.2285	23.0867	29.4056	20.0135	19.942	24.6624	1.2367	0.367923	0.756091	#N/A
Solyc01g090260	15.8354	21.0103	16.7096	14.3	12.618	17.4042	10.7448	18.4816	16.7915	14.4509	-1.16197	0.349634	0.745811	1 ARM repeat superfamily protein (AHRD V3.3 *** AT3G08800.1)
Solyc01g090280	71.0544	44.8161	37.4182	59.8951	32.9224	31.4602	54.1112	77.5357	51.6862	45.6573	-1.13205	0.61214	0.879526	Leucine carboxyl methyltransferase.1
Solyc01g090290	90.4364	88.9065	82.045	59.8015	63.1164	81.8153	65.8635	79.6639	79.252	72.1474	-1.09847	0.475209	0.815504	COP9 signalosome complex subunit 7 (AHRD V3.3 *** A0A1U8ECL6_CAPAN)
Solyc01g090350	132.218	7.65255	7.03637	5.67848	3.52268	4.27592	174.382	74.5139	14.1798	21.0334	1.48334	0.658393	0.897172	Non-specific lipid-transfer protein (AHRD V3.3 *** K4AYX6_SOLLC)
Solyc01g090410	14.4148	11.3909	25.0626	35.3039	37.195	25.2594	57.1632	30.7022	19.5233	35.8342	1.83546	0.0271623	0.286917	Alpha/beta-Hydrolases superfamily protein (AHRD V3.3 *** A0A2U1KLU2_ARTAN)
Solyc01g090420	67.1131	90.4804	72.4918	27.499	45.9222	67.0506	35.7388	47.5111	58.9851	47.8179	-1.23354	0.36748	0.755803	Protein ARABIDILLO.1
Solyc01g090440	64.5457	84.7941	61.7887	67.7519	95.9565	105.288	70.3971	90.1245	69.1856	89.4773	1.29329	0.0309962	0.300554	cotton fiber protein (AHRD V3.3 *-* AT3G60380.1)
Solyc01g090450	37.1046	49.6712	19.7919	20.1354	27.4574	21.0271	38.0583	29.8443	29.2749	28.4569	-1.02875	0.891214	0.968541	Actin-related protein 2/3 complex subunit 5 (AHRD V3.3 *** A0A1U8EEJ8_CAPAN)
Solyc01g090470	189.487	170.896	124.113	158.435	144.362	128.889	208.142	187.512	158.853	164.159	1.0334	0.826262	0.953223	rRNA processing protein-like protein (AHRD V3.3 *** A0A1P8BD18_ARATH)
Solyc01g090480	20.8726	27.5401	29.6352	24.1451	25.3173	21.492	14.7675	12.5637	25.3247	17.825	-1.42074	0.0616527	0.393154	RNA-binding KH domain-containing protein PEPPER-like (AHRD V3.11 *** tr|A0A2I4EJW1|A0A2I4EJW1_9ROSI)
Solyc01g090550	43.0258	44.8561	34.4479	27.131	48.4663	37.6781	37.8736	29.9792	36.6475	37.9465	1.03544	0.831167	0.954144	DnaJ protein like (AHRD V3.3 *** A0A2I0VGE3_9ASPA)
Solyc01g090590	57.6339	38.8949	24.3261	35.556	33.9615	30.4082	46.295	62.4562	37.3154	41.5692	1.11399	0.597246	0.874843	Alpha/beta-Hydrolases superfamily protein (AHRD V3.3 *** A0A2U1P0W9_ARTAN)
Solyc01g090600	2780.15	3467.04	2940.18	2579.54	3927.81	4476.84	1389.76	2933.97	2924.06	2909.91	-1.00486	0.985035	0.995557	Chalcone synthase (AHRD V3.11 *** tr|A0A2U1NKH0|A0A2U1NKH0_ARTAN)
Solyc01g090650	15.5701	14.9581	43.719	30.4883	20.2107	21.5551	23.0118	16.9797	23.6044	20.312	-1.16209	0.56761	0.862057	SNF2 domain-containing protein / helicase domain-containing protein (AHRD V3.3 *** A0A1P8AXX5_ARATH)
Solyc01g090670	45.8161	67.6756	43.4346	26.4633	19.2326	5.49942	19.2536	24.7113	43.4493	14.9775	-2.90096	0.00357784	0.1243	nuclear pore complex protein NUP62 (AHRD V3.3 *-* A0A2I4GEZ1_9ROSI)
Solyc01g090690	99.2003	86.8339	96.6082	92.5171	58.7012	65.0665	110.679	91.3875	93.672	78.8386	-1.18815	0.263489	0.681717	Elongation factor G, mitochondrial (AHRD V3.11 *** tr|A0A1U8EDZ1|A0A1U8EDZ1_CAPAN)
Solyc01g090710	461.468	297.305	346.616	763.574	358.669	83.7661	590.137	681.248	436.527	331.517	-1.31676	0.470832	0.813724	Malate dehydrogenase (AHRD V3.11 *** tr|Q645N0|Q645N0_SOLLC)
Solyc01g090730	253.193	270.499	267.408	266.958	265.435	244.19	167.482	167.46	264.429	206.486	-1.28061	0.0401384	0.331909	Squamosa promoter binding protein 8b
Solyc01g090760	229.935	222.725	219.585	281.265	149.569	231.307	191.414	253.494	237.15	202.415	-1.1716	0.222791	0.63767	GATA transcription factor (AHRD V3.11 *** tr|K4AZ17|K4AZ17_SOLLC)
Solyc01g090770	45.775	35.0716	41.9502	38.4661	35.0043	22.693	28.9363	38.0894	40.1189	30.589	-1.31155	0.0799555	0.435251	alanine-tRNA ligase (AHRD V3.3 *** AT2G45060.1)
Solyc01g090780	160.584	154.301	193.869	151.046	140.332	177.748	181.203	197.921	164.124	172.944	1.05374	0.67578	0.903353	CCR4-NOT transcription complex subunit.1
Solyc01g090840	24.181	24.3565	16.6224	23.3481	16.9006	13.1163	18.7956	25.573	21.8655	18.0671	-1.21024	0.316407	0.721807	Zinc finger protein (AHRD V3.11 *** tr|A0A200PXY0|A0A200PXY0_9MAGN)
Solyc01g090860	59.4232	54.0405	55.5788	64.1469	44.5944	71.0915	85.409	49.3392	58.1688	60.4573	1.03934	0.790737	0.942567	Non-canonical poly(A) RNA polymerase PAPD7 (AHRD V3.3 *-* A0A1J3H7W2_NOCCA)
Solyc01g090870	10.6464	28.8882	25.147	13.0215	17.4461	70.0728	7.15835	20.0007	17.8142	20.4539	1.14818	0.75063	0.930102	Transcription repressor OFP17 (AHRD V3.3 *** A0A2G2XV47_CAPAN)
Solyc01g090880	42.9365	24.0533	36.498	27.958	32.7499	35.8467	44.2617	38.8091	32.0401	37.6838	1.17615	0.277571	0.693825	Holliday junction resolvase (AHRD V3.3 *** B6TEN1_MAIZE)
Solyc01g090910	43.5349	44.679	52.5496	22.588	46.3647	52.79	25.0571	36.8817	38.9805	38.7811	-1.00514	0.981317	0.994628	Vesicle-associated protein 1.1
Solyc01g090940	20.7557	71.7151	35.1563	23.877	68.6318	74.1318	41.6407	44.5718	33.4335	55.4341	1.65804	0.0720095	0.418799	Phosphatidate cytidylyltransferase (AHRD V3.3 *** A0A2G2XTA5_CAPBA),Pfam:PF01148
Solyc01g090970	17.0404	19.3434	11.8184	13.8963	21.3945	16.7002	13.1093	19.3004	15.2534	17.3397	1.13678	0.440253	0.797163	#N/A
Solyc01g090990	35.3588	41.763	33.1737	28.2146	37.3224	46.0293	25.1833	20.9113	34.2878	30.8407	-1.11177	0.566776	0.862011	Vesicle-associated protein 1.1
Solyc01g091020	35.1774	40.2829	42.1017	18.8773	41.6905	37.3173	22.4047	32.4363	32.5766	32.6084	1.00098	0.995987	0.998377	Golgi SNAP receptor complex member.1
Solyc01g091050	27.6581	25.9324	21.0547	41.2519	45.7522	42.8797	54.1341	37.5056	28.0941	44.6743	1.59017	0.04085	0.332212	Pectinesterase (AHRD V3.11 *** tr|A0A2G2XP44|A0A2G2XP44_CAPBA)
Solyc01g091080	28.1062	35.6408	22.0471	34.1138	39.4306	27.3051	23.6186	18.9883	29.4617	26.3606	-1.11764	0.514262	0.833797	tubulin-folding cofactor D (AHRD V3.3 *** A0A2I4EM28_9ROSI)
Solyc01g091090	63.63	87.0476	51.6032	22.7537	63.8664	53.2829	92.0866	46.1288	50.4995	61.6605	1.22101	0.443999	0.801039	tubulin-folding cofactor D (AHRD V3.11 *** tr|A0A2I4EM28|A0A2I4EM28_9ROSI)
Solyc01g091130	49.7924	57.109	49.7331	51.2957	40.8907	62.0625	37.2295	29.814	51.8977	40.9676	-1.2668	0.162135	0.571855	Nitroreductase family protein (AHRD V3.3 *** A0A2K3NXL4_TRIPR)
Solyc01g091140	23.0206	17.2069	20.0535	9.68986	52.0014	60.7053	41.2282	41.9659	16.6564	48.343	2.90236	0.000527549	0.0525093	Nitroreductase family protein (AHRD V3.3 *** A0A2K3NXL4_TRIPR)
Solyc01g091150	9.83797	6.89379	7.65106	5.32252	28.8258	23.9981	8.10919	54.4497	7.24938	23.5089	3.24289	0.00245861	0.10691	#N/A
Solyc01g091160	40.5564	42.4541	44.311	36.5901	60.9342	81.1642	44.5171	66.8082	40.8755	61.9292	1.51507	0.0162755	0.230383	arginase 1
Solyc01g091180	6.55734	19.0766	22.3668	9.99656	19.0478	28.7759	7.36989	14.1261	12.9321	15.4557	1.19514	0.604563	0.877772	Protein NRT1/ PTR FAMILY 7.3 (AHRD V3.3 *** A0A2G2XNQ7_CAPBA)
Solyc01g091190	251.536	211.891	155.31	236.475	247.977	164.622	257.594	222.422	210.341	219.914	1.04551	0.737615	0.923143	5-enolpyruvylshikimate-3-phosphate synthase
Solyc01g091210	26.1558	20.876	24.5145	31.2775	57.0728	25.5522	34.6615	43.4446	25.4371	38.4955	1.51336	0.027178	0.286917	RNA 2'-phosphotransferase, Tp.1
Solyc01g091220	98.1341	84.5672	95.761	64.1	67.4883	77.0328	83.1424	73.2723	84.4826	75.0182	-1.12616	0.316587	0.721869	40S ribosomal protein S13 (AHRD V3.3 *** A0A2I0WN36_9ASPA)
Solyc01g091230	110.158	155.072	97.5361	197.014	167.662	135.216	130.602	126.584	134.603	139.139	1.0337	0.821198	0.95168	Receptor-like kinase (AHRD V3.3 *** A0A191UPW4_CASSA)
Solyc01g091240	21.6736	27.1346	30.9682	26.4747	37.1885	33.0476	29.1841	23.0684	26.3512	30.1598	1.14453	0.395386	0.773575	Pentatricopeptide repeat-containing protein, chloroplastic (AHRD V3.3 *** A0A2G3DDW2_CAPCH)
Solyc01g091260	38.5282	56.8534	42.3589	81.1799	16.972	17.6582	24.605	23.6193	52.388	20.4288	-2.56442	0.000974004	0.0693154	myeloid leukemia factor (AHRD V3.3 *** AT2G45380.4)
Solyc01g091270	17.9934	13.9753	26.821	29.0078	15.0232	26.2061	25.5253	29.9722	21.0313	23.4268	1.1139	0.602689	0.876518	myeloid leukemia factor (AHRD V3.3 *** AT2G45380.4)
Solyc01g091280	43.0189	55.4859	60.7463	29.3753	68.4962	76.0195	37.2357	43.3358	45.4293	53.8393	1.18512	0.414392	0.783095	S-acyltransferase (AHRD V3.3 *** A0A1U8GVQ8_CAPAN)
Solyc01g091310	29.2577	39.7848	27.3558	56.1507	30.7171	26.127	33.0587	48.5418	36.5671	33.6874	-1.08548	0.652277	0.895034	Transducin/WD40 repeat-like superfamily protein (AHRD V3.3 *** A0A2U1L635_ARTAN)
Solyc01g091320	78.0782	66.3958	30.9052	44.5601	55.3251	68.7272	70.2351	48.1548	51.6907	59.884	1.15851	0.48842	0.822659	Methylsterol monooxygenase 1-2 (AHRD V3.3 *** A0A1U8H2N7_CAPAN)
Solyc01g091340	30.3503	25.2146	53.7263	41.3851	31.907	44.5121	28.9531	27.5287	36.117	32.6183	-1.10726	0.677095	0.903836	Peptidylprolyl isomerase (AHRD V3.3 *** A0A2G3AH66_CAPAN)
Solyc01g091350	12.0851	26.5247	18.2175	65.5141	20.1402	33.5665	9.40956	11.3895	24.8703	16.4063	-1.5159	0.304683	0.713686	ATP-dependent DNA helicase 2 subunit KU80 (AHRD V3.3 *** A0A2G3AH96_CAPAN)
Solyc01g091360	15.2944	19.922	29.4218	41.5289	11.2003	34.1438	45.0365	39.1722	24.7014	28.6597	1.16024	0.637364	0.886479	DUF1499 family protein Chr3:22470579-22471756 FORWARD LENGTH=214 201606 (AHRD V3.11 *** AT3G60810.1)
Solyc01g091370	38.2748	46.7802	57.4671	44.8747	23.0572	55.8832	30.8508	34.0718	46.3553	34.1144	-1.35882	0.111321	0.495603	AT-hook motif nuclear-localized protein.1
Solyc01g091380	48.9947	117.982	96.6724	80.6313	107.404	104.9	53.8171	76.4465	81.93	82.5123	1.00711	0.973387	0.992055	65-kDa microtubule-associated protein 9 (AHRD V3.11 *** tr|A0A2G2XNT4|A0A2G2XNT4_CAPBA)
Solyc01g091390	12.3804	7.80573	8.73348	17.7443	35.4817	12.2771	8.87	14.4468	11.0624	15.3709	1.38947	0.26488	0.68306	hypothetical protein (AHRD V3.3 *** AT3G60850.1)
Solyc01g091500	30.7916	31.3294	20.9253	31.1401	24.5561	13.0624	10.5525	9.06807	28.1575	13.2362	-2.12731	0.0234358	0.271898	SMAD/FHA domain protein (AHRD V3.3 *** A0A2K3NM18_TRIPR)
Solyc01g091540	10.684	12.0585	7.54232	19.8498	8.25728	8.29403	7.11989	12.6845	11.7848	8.86823	-1.32888	0.255684	0.673489	Growth-regulating factor 10 (AHRD V3.3 *** A0A2G3AGX2_CAPAN)
Solyc01g091550	22.6472	21.1632	29.2965	18.0812	20.0881	17.8896	23.3095	26.2885	22.4471	21.6625	-1.03622	0.842021	0.957012	Thioesterase superfamily (AHRD V3.3 *** A0A200QUL3_9MAGN)
Solyc01g091570	11.1455	7.45254	7.41436	11.4111	7.63979	7.57873	11.4547	12.4491	9.15591	9.53233	1.04111	0.819347	0.951188	Thioesterase superfamily (AHRD V3.3 *** A0A200QUL3_9MAGN)
Solyc01g091600	15.4496	12.642	12.6739	10.8008	13.9363	23.4627	16.322	11.1445	12.7872	15.6167	1.22128	0.356495	0.749266	RING/U-box superfamily protein (AHRD V3.3 *** Q93YQ5_ARATH)
Solyc01g091620	968.431	1297.36	1268.99	926.94	1412.26	1701.97	705.245	999.551	1102.58	1140.91	1.03477	0.846587	0.957954	Shaggy-related protein kinase theta (AHRD V3.3 *** A0A2G2XNW0_CAPBA)
Solyc01g091690	35.1269	87.0901	83.6855	58.66	77.7727	126.331	14.5901	63.9208	62.2516	55.0186	-1.13146	0.751056	0.930425	S-adenosyl-L-methionine-dependent methyltransferases superfamily protein (AHRD V3.3 *** A0A2U1NM08_ARTAN)
Solyc01g091700	9.80801	8.05474	7.79563	7.56032	6.73972	10.3562	8.32332	6.55571	8.26049	7.85579	-1.05152	0.718619	0.917053	F-box protein PP2-A15 (AHRD V3.11 *** tr|A0A2G3AGV7|A0A2G3AGV7_CAPAN)
Solyc01g091710	28.092	19.6504	13.1044	19.1457	28.7752	12.2315	14.4883	15.6024	19.2913	16.7949	-1.14864	0.55597	0.857098	F-box family protein (AHRD V3.3 *** A0A2U1QK66_ARTAN)
Solyc01g091770	13.7755	16.078	12.923	14.8848	15.6846	26.3809	12.5338	11.9422	14.3669	15.7755	1.09805	0.602988	0.876804	RING/U-box superfamily protein (AHRD V3.3 *-* A0A2U1LC40_ARTAN)
Solyc01g091780	7.97064	8.5171	4.91009	9.1112	17.0077	13.1344	8.62286	8.65409	7.42357	11.3627	1.53063	0.113466	0.499947	Protein-ribulosamine 3-kinase, chloroplastic (AHRD V3.11 *** tr|A0A2G2W3U1|A0A2G2W3U1_CAPBA)
Solyc01g091790	29.3024	20.2674	26.6425	24.5792	45.2966	26.1159	32.5895	18.3103	24.9724	28.9858	1.16071	0.543566	0.8506	#N/A
Solyc01g091840	35.8012	35.3373	66.0087	30.2423	80.6502	53.7539	36.637	24.6121	39.8645	44.4653	1.11541	0.661928	0.898479	UDP-galactose/UDP-glucose transporter 2 (AHRD V3.3 *** A0A2G3DE09_CAPCH)
Solyc01g091860	38.7907	33.5922	43.0589	24.3762	51.35	26.1381	44.2214	35.1241	34.1978	37.9982	1.11113	0.643577	0.890022	SET domain-containing protein (AHRD V3.11 *** tr|A0A2U1QPR8|A0A2U1QPR8_ARTAN)
Solyc01g091880	27.966	47.0343	33.978	19.641	21.4563	41.5152	25.7524	30.2047	30.6091	28.8512	-1.06093	0.823574	0.952252	ATPase (AHRD V3.3 *** A0A1U8GU61_CAPAN)
Solyc01g091900	12.7393	28.0347	12.8356	9.25027	9.35841	9.16586	7.74752	14.8206	14.35	9.96209	-1.44046	0.115974	0.505346	Peroxisomal membrane protein PEX16 (AHRD V3.3 *** A0A2G2W3T2_CAPBA)
Solyc01g091910	98.5443	73.9985	119.774	109.902	115.514	88.0667	84.6407	103.562	98.9819	97.1754	-1.01859	0.880168	0.964966	phospholipase PLDb2
Solyc01g091950	21.2589	51.1728	30.3346	32.6041	42.4347	36.4516	14.5238	40.4809	32.2068	30.8811	-1.04293	0.868921	0.963598	Lysophospholipid acyltransferase LPEAT2 (AHRD V3.11 *** tr|A0A1U8GTY1|A0A1U8GTY1_CAPAN)
Solyc01g093960	41.4499	42.2089	35.9677	31.3625	26.541	31.7876	43.6465	35.0124	37.4811	33.6966	-1.11231	0.49719	0.826675	MADS box transcription factor (AHRD V3.3 *** O82129_WHEAT)
Solyc01g093990	27.8263	21.5652	22.3813	22.3012	21.6438	25.1616	11.0436	21.721	23.394	19.0115	-1.23052	0.259959	0.677504	Glyoxylate/hydroxypyruvate reductase HPR3 (AHRD V3.3 *** A0A2G3AGX8_CAPAN)
Solyc01g094000	28.6872	64.5458	18.424	27.075	25.3868	32.7403	32.0137	29.3452	31.0011	29.7263	-1.04288	0.849561	0.958817	Poly(A) RNA polymerase cid.1
Solyc01g094040	32.1359	29.9719	18.7592	21.8719	29.7498	34.9961	20.9421	33.8865	25.0727	29.3182	1.16933	0.37292	0.759084	blue copper protein-like (AHRD V3.3 *** A0A2I4GQX2_9ROSI)
Solyc01g094080	40.585	40.0264	27.1173	32.4359	37.5873	25.522	33.1746	60.8	34.5737	37.2963	1.07875	0.70609	0.913453	Cytochrome P450 (AHRD V3.3 *** A0A200PMP8_9MAGN)
Solyc01g094150	91.2076	86.5489	99.7321	88.3793	108.826	107.395	83.0276	128.784	91.3313	105.73	1.15766	0.185843	0.599298	AAA-type ATPase family protein (AHRD V3.3 *** A0A2U1ML03_ARTAN)
Solyc01g094170	20.2709	28.2309	26.3261	28.0544	7.03443	10.9438	13.7242	13.3291	25.4974	10.8936	-2.34059	0.000529533	0.0525093	Digalactosyldiacylglycerol synthase 2, chloroplastic (AHRD V3.3 *** A0A1U8E3X1_CAPAN)
Solyc01g094250	54.7362	41.1628	24.0057	59.4901	36.4219	24.5741	49.457	34.7881	42.353	35.2269	-1.20229	0.388569	0.76966	#N/A
Solyc01g094280	124.85	113.699	74.7265	121.208	84.801	68.8498	90.5169	94.6647	106.485	84.1018	-1.26614	0.0956773	0.466675	Bifunctional protein folD (AHRD V3.3 *** A0A2K3NTE4_TRIPR)
Solyc01g094290	52.3077	38.7812	41.2536	37.2864	20.0823	20.5125	18.0795	31.3989	42.0291	21.9904	-1.91125	0.0019023	0.0984047	K(+) efflux antiporter 1, chloroplastic (AHRD V3.3 *** A0A2G2YXI5_CAPAN)
Solyc01g094300	33.1414	68.6604	26.5868	33.7903	135.635	154.542	8.32114	23.739	37.8124	45.1093	1.19298	0.777521	0.937766	U4/U6 small nuclear ribonucleoprotein Prp31-like (AHRD V3.3 *** A0A2I4E1L8_9ROSI)
Solyc01g094330	14.0415	10.2827	21.8883	21.1697	18.9268	12.4885	21.9913	6.4172	16.0828	13.5144	-1.19005	0.555741	0.856977	Terpene utilization protein AtuA (AHRD V3.3 *** A0A191YQC8_9PSED)
Solyc01g094350	16.8273	12.0211	23.3104	28.2583	13.3153	19.6126	16.6868	23.1662	19.1057	17.825	-1.07185	0.789082	0.942496	RNA helicase DEAD4
Solyc01g094370	15.0098	20.6647	20.8693	11.2386	16.0852	12.0953	14.8697	16.2188	16.4231	14.7177	-1.11588	0.520563	0.837311	remorin 2
Solyc01g094420	64.4841	63.5484	74.5959	43.8017	47.0414	46.4406	93.9337	67.0484	60.491	60.9042	1.00683	0.96726	0.99045	Peptidyl-prolyl cis-trans isomerase PASTICCIN.1
Solyc01g094460	25.1625	34.6038	40.0927	27.8825	15.6482	39.3136	33.3196	25.8388	31.41	26.9771	-1.16432	0.549051	0.854021	AT-hook motif nuclear-localized protein 9-like (AHRD V3.3 *** A0A2I4E613_9ROSI)
Solyc01g094490	25.6228	37.3035	27.1356	29.0423	77.6348	69.1472	15.6558	29.0593	29.4602	39.532	1.34187	0.392517	0.772585	#N/A
Solyc01g094500	40.1984	50.1223	48.9492	57.2152	40.397	36.155	45.1789	42.2819	48.7387	40.8697	-1.19254	0.186601	0.599695	Riboflavin biosynthesis protein RibD (AHRD V3.3 *** A0A2K3P0N6_TRIPR)
Solyc01g094520	44.9666	58.7957	49.3631	43.3784	69.9296	60.5487	48.5079	49.0231	48.7784	56.3307	1.15483	0.346883	0.744112	F-box/kelch-repeat protein SKIP4 (AHRD V3.3 *** A0A2G3BT10_CAPCH)
Solyc01g094530	33.8818	20.3947	16.005	14.597	19.8899	22.7171	7.87499	27.6424	20.0448	17.7093	-1.13187	0.655817	0.896442	Acyl-CoA thioesterase family protein (AHRD V3.3 *** A0A2U1Q5B6_ARTAN),Pfam:PF13622
Solyc01g094550	93.175	86.4803	70.8154	67.3384	51.9362	123.518	63.9028	85.279	78.7321	76.8936	-1.02391	0.905219	0.972644	Acyl-CoA thioesterase family protein (AHRD V3.3 *** A0A2U1Q5B6_ARTAN),Pfam:PF13622
Solyc01g094570	25.4607	28.7436	43.3444	28.3526	39.3408	13.5443	16.3718	25.5888	30.7953	21.7363	-1.41677	0.145867	0.550845	Alpha/beta-Hydrolases superfamily protein (AHRD V3.3 *** A0A2U1MXT7_ARTAN)
Solyc01g094580	28.353	24.694	43.3244	7.6869	32.7967	35.5675	22.2454	25.6821	21.9745	28.5718	1.30023	0.43945	0.796605	Beta-amylase (AHRD V3.3 *** A0A2G2W5P7_CAPBA)
Solyc01g094620	87.2626	87.785	72.0563	62.6493	90.9031	108.444	139.182	96.6487	76.6848	107.31	1.39937	0.0213312	0.262039	Mediator of RNA polymerase II transcription subunit 12 (AHRD V3.3 *** A0A2G2YXN8_CAPAN)
Solyc01g094640	23.3981	17.528	18.4764	17.9015	10.4817	18.7295	18.9406	19.8677	19.1913	16.4863	-1.16407	0.513805	0.833797	DUF37.1
Solyc01g094670	172.396	91.8775	83.961	73.6069	73.1326	72.4577	163.588	126.511	99.4679	102.334	1.02881	0.897096	0.970599	Aberrant root formation protein (AHRD V3.3 *** A0A1P8BFN5_ARATH)
Solyc01g094750	301.083	475.417	558.024	257.642	383.115	600.886	299.861	379.754	378.754	402.379	1.06238	0.735429	0.921738	Cytochrome P450 (AHRD V3.11 *** tr|A0A2U1NG86|A0A2U1NG86_ARTAN)
Solyc01g094770	35.416	55.9382	34.5795	30.2	64.3729	54.8397	47.8434	47.0479	37.9257	53.0934	1.39993	0.040966	0.332212	#N/A
Solyc01g094780	53.0962	46.377	58.4552	24.916	18.0358	41.731	38.4162	63.0203	43.5178	36.7407	-1.18446	0.576826	0.867826	LDL receptor wingless signaling/trafficking chaperone Chr2:18921194-18922047 REVERSE LENGTH=208 201606 (AHRD V3.11 *** AT2G46000.1)
Solyc01g094790	31.0184	42.8305	18.1901	43.1712	41.7915	32.9855	43.3047	34.1304	31.9596	37.7809	1.18215	0.526628	0.840413	Cysteine synthase (AHRD V3.3 *** A0A2G3BSX6_CAPCH)
Solyc01g094820	30.5587	58.5746	44.725	19.391	28.2404	27.2181	27.2181	21.4395	35.2979	25.8792	-1.36395	0.156311	0.564698	ARID domain-containing protein (AHRD V3.3 *** A0A1Q3B9R1_CEPFO)
Solyc01g094860	17.5055	7.94354	21.0714	16.0955	64.0615	42.2364	10.2479	31.9727	14.7366	30.6849	2.08223	0.0813947	0.438084	Transmembrane protein-related protein (AHRD V3.3 *** A0A2U1LWU9_ARTAN)
Solyc01g094870	459.715	402.35	410.608	367.028	366.384	313.339	409.826	318.494	408.606	349.875	-1.16786	0.166462	0.57938	PLAC8 family protein (AHRD V3.3 *** A0A2U1MEC7_ARTAN)
Solyc01g094890	23.5692	25.6062	19.1839	14.0761	28.5487	15.6273	8.41832	10.1706	20.0922	13.9801	-1.4372	0.165441	0.577608	Ferric reduction oxidase 2 (AHRD V3.3 *** A0A2G2W6D0_CAPBA)
Solyc01g094930	124.69	100.239	131.697	128.698	116.669	90.3748	93.5465	85.4542	120.643	95.8167	-1.25911	0.0480895	0.355331	CAAX prenyl protease.1
Solyc01g094940	23.8714	30.9609	25.5297	11.3037	25.5612	15.5523	12.4673	28.3245	21.4901	19.3565	-1.11023	0.665198	0.900354	Protein kinase superfamily protein (AHRD V3.3 *** A0A2U1NZX1_ARTAN)
Solyc01g094970	116.968	122.158	46.5675	10.7755	12.0664	8.82457	204.242	207.878	51.7461	46.1112	-1.1222	0.877097	0.964862	Pectin lyase-like superfamily protein (AHRD V3.3 *** A0A1I9LS88_ARATH)
Solyc01g094990	23.3901	10.5557	15.8696	17.381	8.86232	8.37049	70.389	29.3212	16.1544	19.7809	1.22449	0.630957	0.885174	DUF604 domain-containing protein (AHRD V3.3 *** A0A1Q3C751_CEPFO)
Solyc01g095000	20.3024	21.2553	23.1553	17.6048	28.8557	23.4748	28.7419	25.2358	20.4797	26.4753	1.29276	0.159725	0.569584	Nuclear transport factor 2 (NTF2) family protein (AHRD V3.3 *** B4FRE7_MAIZE)
Solyc01g095030	30.9359	30.3359	40.2174	41.4106	33.7091	57.3816	46.623	23.8925	35.3579	38.313	1.08358	0.660916	0.898294	Altered Response to Salt Stress 1
Solyc01g095040	25.4842	27.6298	16.4753	22.6108	17.629	33.4327	20.134	17.2056	22.6308	21.2569	-1.06463	0.799069	0.944283	C-terminal binding protein AN (AHRD V3.3 *** A0A2G3BT74_CAPCH)
Solyc01g095090	17.0628	20.7736	22.7067	22.984	52.5686	72.5745	45.9537	15.3305	20.7389	40.4899	1.95237	0.0257067	0.278903	RING/U-box superfamily protein (AHRD V3.3 *** A0A2U1PKV6_ARTAN)
Solyc01g095110	20.2073	19.8079	27.0696	23.9848	17.0485	12.4774	24.4376	16.827	22.5783	17.1976	-1.31287	0.100871	0.473462	Pentatricopeptide repeat-containing protein (AHRD V3.11 *** tr|A0A1J3JYF9|A0A1J3JYF9_NOCCA)
Solyc01g095120	81.7153	45.317	69.2984	104.512	100.687	60.0433	61.8891	50.1173	71.9638	65.8051	-1.09359	0.67168	0.902642	Proline iminopeptidase (AHRD V3.3 *** A0A1J3I0I9_NOCCA)
Solyc01g095130	30.427	29.7562	47.3084	33.7475	40.3464	38.1353	61.5512	28.0907	34.674	40.3862	1.16474	0.391569	0.771171	E4 SUMO-protein ligase PIAL1-like isoform .1
Solyc01g095140	18.1702	15.8438	12.7104	9.64346	8.27667	8.04092	14.0714	9.9432	13.7058	9.82327	-1.39523	0.121658	0.514048	Desiccation protectant protein Lea14-like protein (AHRD V3.11 *** tr|A0A2G3BT76|A0A2G3BT76_CAPCH)
Solyc01g095180	80.4815	71.6836	55.4652	51.8752	59.7756	55.2929	59.4794	56.4217	63.8299	57.7101	-1.10604	0.396976	0.774917	RING/U-box superfamily protein (AHRD V3.3 *-* A0A178VRD3_ARATH)
Solyc01g095210	281.653	224.791	191.691	276.123	268.497	209.798	238.6	260.752	240.602	243.31	1.01125	0.91513	0.976249	Golgin candidate 4 (AHRD V3.3 *** A0A2G2YY90_CAPAN)
Solyc01g095270	118.401	237.755	202.8	167.847	273.278	254.647	94.7679	176.19	175.941	184.627	1.04937	0.852358	0.958981	DUF2358 domain-containing protein (AHRD V3.3 *** A0A1Q3BPE1_CEPFO)
Solyc01g095290	10.8048	10.1332	7.113	16.0461	8.77494	6.60349	9.14942	11.6571	10.573	8.86646	-1.19247	0.422609	0.788165	Glycosyltransferase (AHRD V3.3 *** A0A1U8DT12_CAPAN)
Solyc01g095350	15.0053	11.2728	9.06621	6.22265	9.31141	8.25855	33.1086	19.9155	9.8837	15.0059	1.51825	0.197667	0.610748	#N/A
Solyc01g095360	9.83798	13.547	13.3546	11.381	14.1726	14.9922	10.7089	14.1635	11.93	13.3986	1.1231	0.400722	0.776578	Calcium-dependent lipid-binding (CaLB domain) family protein (AHRD V3.3 *-* Q9M148_ARATH)
Solyc01g095420	47.5862	43.4945	48.1589	45.8001	40.5724	16.0876	59.0604	42.2234	46.2237	35.7185	-1.29411	0.336114	0.734498	copper ion binding protein Chr4:2741256-2742008 FORWARD LENGTH=250 201606 (AHRD V3.11 *** AT4G05400.3)
Solyc01g095430	167.798	88.2151	67.7151	123.798	152.882	160.965	153.715	99.7151	105.544	139.361	1.32041	0.180096	0.59323	Protein CURVATURE THYLAKOID 1A, chloroplastic (AHRD V3.3 *** A0A2G2YXY1_CAPAN)
Solyc01g095450	98.4449	106.088	100.555	72.0573	53.7403	98.3159	107.181	88.7753	93.2684	84.2042	-1.10764	0.557602	0.857386	GDSL esterase/lipase (AHRD V3.11 *** tr|A0A2G2W6L9|A0A2G2W6L9_CAPBA)
Solyc01g095460	107.536	57.7162	70.9449	99.1835	42.4643	101.886	53.9861	95.1141	81.293	68.6542	-1.18409	0.447264	0.801667	Common plant regulatory factor.1
Solyc01g095470	40.7076	75.334	40.9406	41.3335	44.288	102.69	42.3913	71.1245	47.7288	60.8524	1.27496	0.305998	0.714596	Glucose-6-phosphate 1-epimerase (AHRD V3.3 *** A0A1U8DT32_CAPAN)
Solyc01g095480	26.76	32.8557	19.8963	41.2307	15.1103	28.3944	37.663	26.0688	29.1422	25.4762	-1.1439	0.60555	0.877905	#N/A
Solyc01g095490	19.7307	24.6127	28.5281	23.5196	25.8534	31.0995	17.6766	26.4744	23.8919	24.767	1.03663	0.818245	0.951145	Ubiquitin-conjugating enzyme (AHRD V3.3 *** H6VUS9_9FABA)
Solyc01g095510	142.882	83.6318	54.7153	64.6318	36.3217	69.6318	73.4651	147.715	80.6261	72.3802	-1.11392	0.705882	0.913453	Mitochondrial carrier protein MT.1
Solyc01g095530	119.785	111.59	97.8333	111.32	133.428	138.905	154.213	147.289	109.843	143.24	1.30404	0.0044296	0.135741	hypothetical protein (AHRD V3.3 *-* AT5G41761.1)
Solyc01g095540	86.7793	123.107	85.6142	80.8044	70.7984	127.393	80.4656	87.2018	92.7191	89.1921	-1.03954	0.793198	0.943332	CMP-sialic acid transporter.1
Solyc01g095570	11.9111	13.974	15.2582	12.4603	15.5368	18.1719	19.7699	19.2021	13.3375	18.0937	1.3566	0.0452285	0.34722	Mitochondrial carrier protein (AHRD V3.3 *** A0A200PUN8_9MAGN)
Solyc01g095580	55.0737	87.5903	60.3216	61.5114	64.5032	171.366	30.4412	78.1783	65.044	71.6166	1.10105	0.748751	0.929129	Auxin-responsive GH3 family protein (AHRD V3.3 *** A0A2U1NZC8_ARTAN)
Solyc01g095590	39.8525	59.7902	49.2084	51.7704	37.1918	27.8105	34.472	67.0759	49.6365	39.3253	-1.2622	0.307792	0.716054	Extra-large G-like protein, putative (DUF3133) (AHRD V3.3 *** Q0WVG1_ARATH)
Solyc01g095630	21.6421	14.1399	19.8056	26.9356	13.8635	19.3967	18.3824	23.9366	20.1009	18.5467	-1.0838	0.619868	0.881792	WRKY transcription factor 41
Solyc01g095670	134.664	153.462	124.316	127.981	108.432	114.029	78.5001	142.637	134.658	108.472	-1.2414	0.213683	0.628837	Rhodanese-like domain-containing protein 4, chloroplastic (AHRD V3.3 *** A0A2G2YYH2_CAPAN)
Solyc01g095690	9.80392	12.03	9.70515	9.01226	7.69239	8.62139	5.05959	6.45612	10.078	6.82231	-1.47722	0.0413444	0.332417	Pentatricopeptide repeat-containing protein, mitochondrial (AHRD V3.3 *** A0A2G2YY96_CAPAN)
Solyc01g095700	35.2973	49.8768	40.172	41.4515	52.2113	58.6644	23.9188	62.6126	41.3786	46.2791	1.11843	0.580923	0.870409	Abscisic acid receptor PYL10 (AHRD V3.3 *** A0A2G3BTC1_CAPCH)
Solyc01g095710	58.4428	59.9424	41.9173	31.4726	25.8427	28.039	19.8909	34.9376	46.3658	26.6386	-1.74055	0.028505	0.289856	RNA helicase DEAH-box3
Solyc01g095720	421.644	220.583	263.588	322.38	310.056	289.891	606.485	543.832	298.163	414.944	1.39167	0.106577	0.485211	Alpha/beta-Hydrolases superfamily protein (AHRD V3.3 *** A0A2U1L1L1_ARTAN)
Solyc01g095730	10.7351	16.8706	10.7234	8.96913	11.0018	38.4743	13.4664	17.2778	11.4883	17.7151	1.54201	0.13251	0.529898	PAP/OA.1
Solyc01g095740	21.6752	19.2371	14.7865	14.994	12.5681	20.4542	18.6928	24.6163	17.437	18.5454	1.06357	0.78029	0.938632	DEAD-box ATP-dependent RNA helicase 31 (AHRD V3.11 *** tr|A0A2G2W6P7|A0A2G2W6P7_CAPBA)
Solyc01g095780	1101.53	324.076	173.501	15.4415	47.4024	15.6133	1717.04	981.488	175.857	187.928	1.06864	0.948624	0.985732	#N/A
Solyc01g095790	45.6439	60.0847	43.4746	63.1741	61.3597	79.1022	64.4215	53.5429	52.3878	63.9663	1.22101	0.215628	0.630814	#N/A
Solyc01g095800	37.4824	43.0257	38.3716	58.1186	52.9698	41.7246	39.615	22.905	43.5482	37.6316	-1.15722	0.51757	0.835675	F-box protein (AHRD V3.3 *** A0A2G2XT66_CAPBA)
Solyc01g095900	97.5334	112.278	79.2037	68.3436	99.9799	114.645	77.7004	117.327	87.745	101.105	1.15226	0.4245	0.789949	Tetratricopeptide repeat (TPR)-like superfamily protein (AHRD V3.3 *** A0A2U1QFM4_ARTAN)
Solyc01g095930	19.6095	19.7169	15.5545	15.8012	19.8172	19.6146	35.9079	54.5371	17.5575	29.5377	1.68234	0.0414095	0.332417	O-acyltransferase WSD1-like (AHRD V3.3 *** A0A2I4HF74_9ROSI)
Solyc01g095970	82.964	165.913	99.8729	84.3525	84.5918	118.039	76.234	112.429	103.772	96.1823	-1.07891	0.64681	0.891805	Dynamin-like protein (AHRD V3.3 *** F4K015_ARATH)
Solyc01g095980	18.7484	14.4134	18.2554	17.755	13.4789	9.5794	21.2058	13.9238	17.2032	13.9734	-1.23115	0.248849	0.668159	Acid phosphatase/vanadium-dependent haloperoxidase-related protein (AHRD V3.3 *** Q8RXV2_ARATH)
Solyc01g095990	66.5587	61.7702	97.7295	36.0416	57.0537	71.1075	78.3573	63.6014	61.6884	67.0558	1.08701	0.693308	0.909933	phosphatidylinositol 4-kinase gamma 4-like (AHRD V3.3 *** A0A2I4FK44_9ROSI)
Solyc01g096010	114.135	120.007	96.8818	135.222	58.2037	91.7984	151.366	103.798	115.739	95.7197	-1.20914	0.277975	0.693831	Embryo defective 1703 (AHRD V3.3 *** Q9M360_ARATH)
Solyc01g096090	34.2734	36.991	31.8029	28.4996	33.4788	48.9977	24.9346	40.6847	32.7408	35.9166	1.097	0.580379	0.870215	Fiber protein Fb11 (AHRD V3.11 *** tr|B6SNA3|B6SNA3_MAIZE)
Solyc01g096100	19.9738	16.2198	14.663	24.5091	12.2062	11.743	11.581	16.1994	18.472	12.8056	-1.44249	0.0408623	0.332212	Transmembrane protein (AHRD V3.3 *** A0A1P8B1K1_ARATH)
Solyc01g096140	11.0341	9.51886	6.15567	16.1056	15.7963	10.0446	14.4203	9.17481	10.1017	12.0369	1.19157	0.410598	0.780846	Aluminum-activated malate transporter 10 (AHRD V3.3 *** A0A2G2YY99_CAPAN)
Solyc01g096150	53.3897	34.8075	24.2709	55.4777	54.5616	23.7617	35.0687	36.3308	39.7726	35.8501	-1.10941	0.61897	0.881792	LRAT domain-containing protein (AHRD V3.11 *** tr|A0A1Q3AS87|A0A1Q3AS87_CEPFO)
Solyc01g096160	29.8756	21.9903	26.2617	69.144	26.5557	14.3032	19.5027	32.5004	33.0489	22.1511	-1.49198	0.161257	0.571855	L-fucokinase/GDP-L-fucose pyrophosphorylase (AHRD V3.3 *** A0A2U1NSI7_ARTAN)
Solyc01g096180	24.644	34.197	14.2956	39.5609	18.9845	29.5339	24.644	29.4674	26.2749	25.2606	-1.04016	0.859046	0.961153	Serine/arginine-rich-splicing factor RS.1
Solyc01g096190	133.882	154.382	109.437	187.11	96.8829	109.437	184.872	139.548	143.431	128.603	-1.1153	0.488186	0.822659	Ca2+-ATPase
Solyc01g096200	10.3011	12.7817	11.2611	20.4462	11.9348	9.0182	11.1725	9.4999	13.1952	10.3383	-1.27634	0.18448	0.598566	RING-type E3 ubiquitin transferase (AHRD V3.3 *** A0A2G2W6T8_CAPBA)
Solyc01g096300	14.4902	20.2542	9.8841	8.20089	12.7485	15.106	19.4714	18.2528	12.4193	16.1746	1.30238	0.189834	0.602275	Ubiquitin-specific protease family C19 protein (AHRD V3.3 *-* A0A2K3NKS0_TRIPR)
Solyc01g096330	15.2703	8.29614	10.5631	9.42093	11.1853	8.40918	13.2385	6.25383	10.5962	9.39392	-1.12799	0.560984	0.859073	Unknown protein
Solyc01g096350	92.6747	70.6183	139.285	111.094	116.88	104.909	53.0349	100.37	100.316	89.8833	-1.11607	0.587417	0.872307	CDPK-related kinase 4 (AHRD V3.3 *** A0A2G2W6Y9_CAPBA)
Solyc01g096360	81.2622	59.7636	77.8463	52.1713	49.8371	64.973	46.6626	62.0806	66.6421	55.3417	-1.20419	0.243542	0.661789	Rho GTPase-activating protein 3 (AHRD V3.3 *** A0A2G2YYE8_CAPAN)
Solyc01g096380	9.74527	16.3807	27.307	7.69635	17.5909	30.6995	7.40056	9.54658	13.5338	13.976	1.03267	0.920543	0.97844	S-adenosyl-L-methionine-dependent methyltransferases superfamily protein (AHRD V3.3 *** F4HS78_ARATH)
Solyc01g096400	14.8731	17.4514	15.9879	12.9898	19.33	13.4445	31.5916	22.4913	15.2373	20.7296	1.36045	0.145228	0.550314	Transglut_core2 domain-containing protein (AHRD V3.11 *** tr|A0A1Q3C505|A0A1Q3C505_CEPFO)
Solyc01g096410	22.973	15.2195	14.2135	20.1498	16.1844	13.7741	40.8285	31.832	17.7888	23.2005	1.30421	0.300285	0.710366	Phosphatidylinositol 4-phosphate 5-kinase (AHRD V3.3 *** K4B029_SOLLC)
Solyc01g096430	53.7934	73.8322	62.593	41.521	47.1954	42.6484	56.5575	42.948	56.6816	47.0228	-1.20541	0.218787	0.634865	NADPH:quinone oxidoreductase-like (AHRD V3.3 *** A0A2I4GZV4_9ROSI)
Solyc01g096480	55.4731	53.1164	34.4044	52.6501	39.9224	44.9379	28.0166	39.439	48.0652	37.5226	-1.28097	0.11174	0.496375	Sequence-specific DNA binding transcription factor (AHRD V3.11 *** tr|A0A1I9LTW1|A0A1I9LTW1_ARATH)
Solyc01g096490	84.8404	99.1651	66.8904	93.22	74.7674	101.461	103.555	117.297	85.1057	97.9755	1.15122	0.36061	0.75119	E3 ubiquitin-protein ligase KEG (AHRD V3.3 *** A0A2G2W6Y1_CAPBA)
Solyc01g096530	22.8138	21.2101	19.1375	17.1304	23.6906	19.1238	27.7956	29.2064	19.9571	24.6264	1.23397	0.271357	0.687043	Trafficking protein particle complex subunit (AHRD V3.3 *** A0A1U8DVU7_CAPAN)
Solyc01g096540	276.715	320.627	169.298	263.881	368.748	308.162	226.436	261.514	250.913	286.409	1.14147	0.395536	0.773575	DUF810 domain-containing protein (AHRD V3.3 *** A0A1Q3BQC6_CEPFO),Pfam:PF05664
Solyc01g096550	70.9383	52.7008	39.7867	61.1702	22.0074	29.1762	72.6638	71.2688	54.9217	42.7026	-1.28614	0.374412	0.759924	Protein arginine N-methyltransferase (AHRD V3.3 *** A0A200R777_9MAGN)
Solyc01g096570	282.921	396.082	411.091	307.403	402.841	405.475	321.845	331.948	344.964	363.458	1.05361	0.601326	0.876231	Exonuclease (AHRD V3.3 *** A0A200Q3Q8_9MAGN)
Solyc01g096590	79.6714	66.7017	53.7545	64.6308	35.8733	38.9234	55.5101	43.5049	65.5501	42.8522	-1.52968	0.00406139	0.131989	40S ribosomal protein S20 (AHRD V3.3 *** A0A2G3BTN1_CAPCH)
Solyc01g096620	39.7559	48.6509	35.5928	17.2489	37.2072	83.3236	35.9029	60.1384	33.0106	50.865	1.54087	0.088722	0.452518	Cilia-and flagella-associated protein 20 (AHRD V3.3 *-* A0A2G2YYL7_CAPAN)
Solyc01g096650	407.583	253.183	297.682	288.582	189.162	107.699	429.583	425.365	306.844	247.01	-1.24224	0.459292	0.808901	RING/U-box superfamily protein (AHRD V3.11 *-* tr|F4KJ04|F4KJ04_ARATH)
Solyc01g096660	277.425	263.527	250.971	274.026	256.219	288.547	295.76	343.268	266.285	294.341	1.10536	0.215166	0.630613	proline-rich family protein (AHRD V3.3 *** AT5G07020.1)
Solyc01g096670	182.032	235.264	220.752	198.895	351.839	383.935	128.062	190.849	208.237	239.706	1.15112	0.549845	0.854131	Cytochrome P450 (AHRD V3.11 *** tr|A0A2U1MC34|A0A2U1MC34_ARTAN)
Solyc01g096680	32.2623	25.9894	40.3699	23.5624	52.0401	58.2244	14.591	42.0298	29.8842	36.9208	1.23546	0.446283	0.801646	65-kDa microtubule-associated protein 5 (AHRD V3.3 *** A0A2G2YYM5_CAPAN),Pfam:PF03999
Solyc01g096700	624.677	600.395	653.9	716.636	903.751	874.341	1118.13	1153.44	647.479	1004.74	1.55177	8.55713e-05	0.0205317	DnaJ domain-containing protein (AHRD V3.3 *-* A0A2U1QIS2_ARTAN)
Solyc01g096720	6.3186	7.58908	9.66932	14.8266	11.4336	19.2344	10.2959	19.5485	9.10567	14.5047	1.59293	0.105979	0.483267	Protein ZINC INDUCED FACILITATOR-LIKE.1
Solyc01g096750	29.7625	32.5615	19.6338	20.2647	55.9924	49.5292	56.2433	35.4628	24.9189	48.4963	1.94617	0.01569	0.227926	Argonaute4d
Solyc01g096760	65.0802	55.1125	52.2537	41.9487	40.0957	44.7225	59.5547	50.3594	52.9522	48.1565	-1.09958	0.449682	0.803527	pre-rRNA-processing protein TSR2-like (AHRD V3.3 *** A0A2I4GN69_9ROSI)
Solyc01g096780	32.0957	38.2639	46.2002	48.1534	39.3591	29.1811	41.2317	34.4372	40.6562	35.7356	-1.13769	0.335995	0.734498	#N/A
Solyc01g096800	73.6007	46.3531	49.5002	45.7187	27.8604	15.4666	50.1955	15.2094	52.7127	23.9491	-2.20103	0.00721319	0.165575	Peter Pan-like protein (AHRD V3.3 *** A0A2G2W6Y4_CAPBA)
Solyc01g096850	31.4544	18.3164	8.7693	33.1197	50.7078	47.3642	38.6218	22.7399	20.2252	38.1098	1.88427	0.0536386	0.371029	Protein FAR1-RELATED SEQUENCE 3 (AHRD V3.3 *** A0A2G2YYN7_CAPAN)
Solyc01g096880	4.45646	38.2853	23.8891	3.71189	7.91422	8.3079	6.75775	10.1198	11.0906	8.18876	-1.35437	0.494764	0.825784	Major facilitator superfamily protein (AHRD V3.3 *** A0A1P8AZ04_ARATH)
Solyc01g096890	50.6325	31.9	52.8286	58.2261	57.972	64.7862	52.9675	44.8246	47.2119	54.6458	1.15746	0.389448	0.76966	Serine-rich adhesin for platelets-like protein (AHRD V3.11 *-* tr|A0A2K3NC33|A0A2K3NC33_TRIPR)
Solyc01g096900	254.443	274.239	249.603	308.138	152.057	172.059	169.588	207.344	270.663	174.158	-1.55412	0.000314683	0.042337	DNA gyrase subunit A (AHRD V3.3 *** A0A2U1Q6G1_ARTAN)
Solyc01g096910	12.6339	20.6647	5.4384	6.0774	20.5072	3.76674	6.75775	13.3623	9.63805	9.13879	-1.05463	0.893317	0.9692	Vacuolar protein sorting-associated protein 36 (AHRD V3.3 *** A0A2G3BTR2_CAPCH),Pfam:PF04157
Solyc01g096920	71.9884	68.2003	68.9741	58.2212	92.2426	44.2554	36.3808	57.7747	66.6352	54.1224	-1.2312	0.266964	0.68465	GATA zinc finger protein (AHRD V3.3 *-* AT5G18440.2)
Solyc01g096930	18.8783	18.2441	17.7792	30.1601	34.1106	12.8585	16.9689	13.7262	20.7304	17.8781	-1.15954	0.588831	0.872474	Phospholipid-transporting ATPase (AHRD V3.3 *** A0A2G2YYQ8_CAPAN)
Solyc01g096940	33.8918	39.7328	20.7557	22.9991	24.486	26.9607	21.9906	32.6912	28.3154	26.247	-1.07881	0.713208	0.916219	Protein kinase (AHRD V3.11 *** tr|Q2HVC0|Q2HVC0_MEDTR)
Solyc01g096950	89.8076	108.597	77.2984	107.115	122.671	97.2151	72.9718	98.9763	94.7955	96.3364	1.01626	0.916972	0.976748	WD40 repeat-containing protein (AHRD V3.3 *** A0A2U1MAJ5_ARTAN)
Solyc01g096970	9.94484	14.3926	5.464	13.0553	4.65736	9.24003	4.01103	7.68909	10.0521	6.03581	-1.66541	0.0686398	0.410728	Unknown protein
Solyc01g096990	151.755	143.071	112.974	191.543	100.347	136.812	132.211	148.244	147.226	128.076	-1.14952	0.29522	0.704006	Vacuolar protein sorting-associated protein 9A (AHRD V3.11 *** tr|A0A1U8DTK0|A0A1U8DTK0_CAPAN)
Solyc01g097000	56.052	88.7913	65.4455	71.8158	61.8873	139.288	36.4203	83.1716	69.5449	71.4839	1.02788	0.904622	0.972644	Glycosyl hydrolase family protein (AHRD V3.3 *** A0A1P8B9U3_ARATH)
Solyc01g097020	254.384	201.799	281.772	233.616	317.075	358.6	221.529	226.719	241.103	274.899	1.14017	0.340732	0.739951	succinate dehydrogenase subunit 8, mitochondrial (AHRD V3.3 *** XP_024440768.1)
Solyc01g097070	110.196	127.715	104.71	84.449	92.536	103.345	81.5638	73.6217	105.62	87.0514	-1.21331	0.1741	0.586518	DNA topoisomerase (AHRD V3.11 *** tr|A0A2G2W734|A0A2G2W734_CAPBA)
Solyc01g097160	80.7432	104.087	51.6387	71.48	106.31	113.094	79.842	95.0002	74.6304	97.7222	1.30942	0.132133	0.529762	FAD/NAD(P)-binding oxidoreductase family protein (AHRD V3.3 *** A0A2K3P5V9_TRIPR)
Solyc01g097190	15.28	11.0055	11.4281	9.68192	7.84749	7.66768	12.1694	13.5705	11.6793	9.98424	-1.16978	0.408831	0.77989	Ankyrin-like protein (AHRD V3.3 *** Q8H9C2_SOLTU)
Solyc01g097200	8.4933	11.2472	5.50058	7.5095	10.9182	15.0381	9.92752	10.401	7.92565	11.4108	1.43972	0.121337	0.514048	Ankyrin-like protein (AHRD V3.11 *** tr|Q8H9C2|Q8H9C2_SOLTU)
Solyc01g097210	15.2376	15.0067	9.1154	14.9416	36.2399	41.9866	16.3424	35.6982	13.2844	30.6948	2.31058	0.00533841	0.144516	#N/A
Solyc01g097250	36.625	49.8826	50.6291	50.209	31.8246	60.0063	42.8617	43.8691	46.4223	43.5308	-1.06642	0.68417	0.905093	Myb/SANT-like DNA-binding domain protein (AHRD V3.3 *** F4JHK5_ARATH)
Solyc01g097320	37.8572	107.319	66.1357	94.4303	100.58	77.9141	76.9101	96.3332	70.973	87.2915	1.22993	0.315554	0.721366	Mediator of RNA polymerase II transcription subunit 14 (AHRD V3.3 *** A0A2G2W775_CAPBA)
Solyc01g097330	36.0419	60.8804	32.7783	53.1061	42.5871	43.2661	38.7322	46.2167	44.2083	42.6162	-1.03736	0.810924	0.948609	Light-inducible protein CPRF2 (AHRD V3.3 *** A0A2G2W7C8_CAPBA)
Solyc01g097340	73.0753	33.7533	64.78	58.1587	95.1401	58.5211	63.1754	110.979	55.2123	79.0434	1.43163	0.0837089	0.443596	GDP-mannose-3',5'-epimerase (AHRD V3.3 *** A5JPK5_VITVI)
Solyc01g097380	4.17689	6.94953	4.35598	7.03455	41.7199	37.853	7.73923	19.5792	5.46113	22.1174	4.04996	0.000540385	0.0525093	NAD(P)-linked oxidoreductase, aldo/keto reductase family protein (AHRD V3.3 *** A0A1Y1HY98_KLENI)
Solyc01g097390	55.2383	47.2265	51.018	46.0905	39.9747	32.3087	49.7866	42.673	49.7669	40.6998	-1.22278	0.132666	0.529952	NAD(P)-linked oxidoreductase, aldo/keto reductase family protein (AHRD V3.3 *** A0A1Y1HY98_KLENI)
Solyc01g097410	2.61199	2.81039	2.76065	7.8628	28.2192	4.72227	2.2939	7.52189	3.55289	6.92467	1.94903	0.136475	0.536621	#N/A
Solyc01g097420	5.50074	10.7274	13.3837	5.23615	11.7945	4.50792	10.089	9.4585	8.01911	8.43979	1.05246	0.856358	0.959895	Calcium-transporting ATPase (AHRD V3.3 *-* A0A2G2W783_CAPBA)
Solyc01g097430	15.8704	8.28901	8.71946	9.48924	14.2153	7.83315	6.02767	6.72888	10.2142	8.19778	-1.24597	0.289771	0.699885	ABC transporter (AHRD V3.11 *** tr|A0A0M3R8G1|A0A0M3R8G1_9SOLA)
Solyc01g097510	7.8628	21.5324	11.6968	16.3807	21.3155	18.1973	15.9043	16.9298	13.4204	17.977	1.33952	0.282697	0.697213	annexin 3
Solyc01g097520	30.7657	27.0398	38.261	32.5531	21.3712	33.6073	25.1733	21.0704	31.9047	24.8438	-1.28421	0.179229	0.592615	#N/A
Solyc01g097540	8.93607	15.1357	8.36542	5.41773	9.6757	6.15077	14.2265	11.027	8.84837	9.82974	1.11091	0.633536	0.885376	annexin 4
Solyc01g097620	8.74273	26.9257	8.02653	5.07791	22.2341	68.2288	6.40705	21.1972	9.89707	21.305	2.15265	0.12415	0.517573	Ribosome biogenesis protein BMS1-like protein (AHRD V3.3 *-* A0A2G2W7A2_CAPBA)
Solyc01g097650	7.1728	16.0887	13.9988	4.52105	8.7122	16.2331	14.4453	18.0204	9.24453	13.8518	1.49837	0.159128	0.568595	Serinc-domain containing serine and sphingolipid biosynthesis protein (AHRD V3.3 *** A0A2U1MZP6_ARTAN)
Solyc01g097660	3436.88	2380.96	2852.28	3010.77	2623.29	1133.27	3620.17	3669.21	2895.32	2506.8	-1.15499	0.489637	0.823248	pectinesterase inhibitor-like (AHRD V3.3 *** A0A1U8H1H8_CAPAN)
Solyc01g097670	13.6547	27.1996	24.7735	16.0971	24.5626	27.9725	8.91999	13.0745	19.6175	16.8247	-1.16599	0.548976	0.854021	Pentatricopeptide repeat (AHRD V3.3 *** A0A200PUU8_9MAGN)
Solyc01g097730	11.9436	11.5211	4.85767	13.7232	4.86665	5.30292	7.57302	9.03025	9.78652	6.48155	-1.5099	0.0867154	0.448449	Pentatricopeptide repeat-containing protein (AHRD V3.3 *** A0A2G2W7A9_CAPBA)
Solyc01g097740	140.798	90.9437	167.525	94.8818	129.077	103.704	128.14	132.615	119.442	122.809	1.02819	0.875499	0.964716	ER membrane protein complex subunit 2 (AHRD V3.3 *** A0A2I4G7Y9_9ROSI)
Solyc01g097770	68.9734	71.4663	68.8667	97.8092	110.319	103.712	101.962	105.47	75.9089	105.32	1.38746	0.00396908	0.131166	phototropin 2
Solyc01g097790	16.1367	17.2424	12.7818	10.9769	15.9636	11.8074	17.3822	19.228	14.0563	15.8428	1.12709	0.442159	0.799203	DUF868 domain-containing protein (AHRD V3.3 *** A0A1Q3CLP0_CEPFO)
Solyc01g097830	7.77823	7.21082	8.62098	10.9598	12.0348	13.5016	6.67927	10.0747	8.53211	10.2258	1.1985	0.283514	0.697737	DUF868 family protein (DUF868) (AHRD V3.3 *** Q9SI11_ARATH)
Solyc01g097840	108.103	153.746	116.821	127.867	166.113	207.077	72.3366	112.437	125.525	129.33	1.03031	0.909821	0.974808	MAP kinase kinase kinase 6
Solyc01g097880	1545.02	891.507	719.048	658.765	1064.67	1044.42	1447.9	1075.42	898.746	1147.1	1.27634	0.201677	0.614848	tRNA-specific adenosine deaminase, chloroplastic (AHRD V3.3 *** A0A2I0WQV8_9ASPA)
Solyc01g097920	22.6009	40.4261	37.8712	33.2235	39.908	26.0079	23.6328	31.3395	32.7443	29.6103	-1.10584	0.563303	0.860521	Cysteine synthase (AHRD V3.3 *** A0A1U8E591_CAPAN)
Solyc01g097930	5.8836	11.2084	44.5061	11.5729	45.2379	6.15642	12.9548	17.5949	13.5757	15.8731	1.16923	0.746523	0.928175	Cysteine synthase (AHRD V3.3 *** A0A2G3BTX8_CAPCH)
Solyc01g097950	8.57065	4.53427	4.58435	4.96953	3.97189	4.60396	7.46968	11.1559	5.4548	6.2479	1.1454	0.656062	0.896668	Cysteine synthase (AHRD V3.3 *** A0A2G2YYZ2_CAPAN)
Solyc01g097970	84.827	79.9226	75.4204	96.1492	49.0451	55.63	77.3159	57.974	83.7355	59.136	-1.41598	0.0273462	0.287135	Deoxyuridine 5'-triphosphate nucleotidohydrolase (AHRD V3.11 *** tr|A0A2G2W7R1|A0A2G2W7R1_CAPBA)
Solyc01g098000	27.2303	25.6008	39.8943	39.0683	28.4076	24.5285	35.036	28.1358	32.2857	28.7886	-1.12148	0.528893	0.841646	Elongation factor 1-delta (AHRD V3.3 *** A0A2G2XZA6_CAPAN)
Solyc01g098030	78.0129	86.2537	83.6684	94.9135	67.3936	57.2381	86.4944	91.1753	85.4985	74.2664	-1.15124	0.301587	0.711459	#N/A
Solyc01g098050	53.6196	98.744	47.3723	26.2745	71.3888	86.6782	64.2825	43.0004	50.6668	64.3097	1.26927	0.484274	0.821497	Agamous-like MADS-box protein AGL.1
Solyc01g098080	9.71825	14.8183	22.2781	19.4767	29.2612	44.5573	11.8001	29.2966	15.8105	25.9107	1.63883	0.127967	0.524947	BY-2 kinesin-like protein 5 (AHRD V3.3 *** Q9AVP5_TOBAC)
Solyc01g098110	112.743	100.71	88.3483	61.0759	71.1039	69.4791	86.5862	83.9115	88.4724	77.4024	-1.14302	0.348554	0.745318	Acyltransferase-like protein, chloroplastic (AHRD V3.11 *** tr|A0A2G3BTU6|A0A2G3BTU6_CAPCH)
Solyc01g098170	57.7278	79.5295	67.8913	40.0901	80.8323	97.8488	64.7589	82.7048	59.4554	80.6757	1.35691	0.0498894	0.362427	Protein HASTY.1
Solyc01g098180	69.0277	105.986	45.8182	45.0268	50.3158	59.6309	89.9403	60.7606	62.3298	63.6339	1.02092	0.912115	0.975432	translation initiation factor eIF-2B subunit epsilon isoform .1
Solyc01g098190	120.073	108.288	117.908	35.5088	77.1857	108.242	76.615	101.721	85.8966	89.8286	1.04578	0.862079	0.961595	(Sodium/potassium)/proton exchanger 4
Solyc01g098200	15.1154	44.9607	30.4018	22.1862	42.4148	23.6701	30.0261	45.0109	26.0201	34.1298	1.31167	0.331406	0.730758	Vesicle-associated protein 1-2 (AHRD V3.3 *** A0A2G2YZ23_CAPAN)
Solyc01g098210	51.6523	52.6948	53.5131	86.1216	92.8154	33.6851	51.4417	67.731	59.5124	57.45	-1.0359	0.862081	0.961595	transmembrane protein adipocyte-associated 1-like (AHRD V3.3 *** A0A2I4GNC8_9ROSI)
Solyc01g098220	1573.64	640.956	1116.66	1575.8	719.452	25.2146	1525.67	968.835	1154.22	404.661	-2.85231	0.144505	0.548867	LOB domain-containing protein 20 (AHRD V3.3 *** A0A2G3BU77_CAPCH)
Solyc01g098230	108.411	146.791	115.561	100.961	110.256	91.0353	71.087	122.246	116.731	96.6405	-1.20789	0.195965	0.608142	Mitochondrial import inner membrane translocase subunit TIM44-2 (AHRD V3.3 *** A0A2G2W7N1_CAPBA)
Solyc01g098240	13.964	19.1861	18.6704	18.1636	61.7517	43.642	24.5972	29.9201	17.3615	37.5276	2.16154	0.00277038	0.11531	FRIGIDA-like protein (AHRD V3.3 *** A0A2G3BU64_CAPCH)
Solyc01g098250	48.8771	73.5935	76.6969	35.5252	52.3858	37.6613	45.8319	72.5645	55.9519	50.6116	-1.10552	0.721301	0.917821	DnaJ domain-containing protein (AHRD V3.3 *** A0A2U1PTF5_ARTAN)
Solyc01g098340	23.2936	18.4748	20.4288	22.429	20.9131	21.9661	17.8762	26.6875	21.0726	21.6366	1.02676	0.837824	0.955516	DnaJ domain (AHRD V3.3 *** A0A200QQ07_9MAGN)
Solyc01g098350	38.0063	55.7615	43.0606	23.1945	22.6459	51.4206	21.6836	42.6399	38.1429	32.2121	-1.18412	0.478316	0.817391	L1_1
Solyc01g098380	75.1143	68.7955	93.728	61.2484	37.303	27.7049	37.9257	47.046	73.8009	36.8502	-2.00273	0.00091452	0.0674441	4-hydroxy-tetrahydrodipicolinate reductase 1, chloroplastic-like (AHRD V3.3 *** A0A1U8FAN3_CAPAN)
Solyc01g098430	23.0369	30.3591	21.8059	38.5094	19.4391	17.6009	24.0029	19.2009	27.683	19.9273	-1.3892	0.0505748	0.363631	Autophagy-related protein 18h (AHRD V3.3 *** A0A2G3BUA1_CAPCH)
Solyc01g098460	92.8601	94.7151	110.262	120.468	81.4556	144.965	74.4386	102.048	103.965	97.3189	-1.06829	0.651431	0.894842	U6 small nuclear RNA (adenine-(43)-N(6))-methyltransferase (AHRD V3.3 *** A0A2G2W7J1_CAPBA)
Solyc01g098500	27.1911	41.1276	29.9115	26.5044	32.9922	56.534	32.4156	43.0667	30.6852	40.1702	1.30911	0.243574	0.661789	Sugar facilitator protein 5
Solyc01g098510	35.9866	25.0812	42.0378	41.2014	31.2771	25.9911	43.3399	32.9318	35.3599	32.82	-1.07739	0.764954	0.934953	#N/A
Solyc01g098530	47.847	59.7972	22.674	68.793	173.965	122.282	39.7171	61.2406	45.9623	84.8126	1.84526	0.0702674	0.415337	CTP synthase (AHRD V3.3 *-* A0A2G3A9D9_CAPAN)
Solyc01g098550	39.6084	45.56	47.2754	44.9502	29.4814	30.0149	29.584	49.2697	44.2522	33.7	-1.31312	0.187724	0.600399	Tryptophan synthase alpha chain (AHRD V3.3 *** A0A2G2W7K5_CAPBA)
Solyc01g098580	108.18	161.265	155.489	69.1459	190.798	257.727	28.97	99.0484	117.028	108.989	-1.07376	0.869626	0.963811	Phosphoglycerate mutase-like protein AT74H (AHRD V3.3 *** A0A2G3BUB5_CAPCH)
Solyc01g098590	10.9988	8.27607	8.93932	16.3807	7.23931	8.81693	5.61487	6.42783	10.7449	6.92795	-1.55094	0.0536951	0.371029	Phosphoglycerate mutase-like protein AT74 (AHRD V3.3 *** A0A2G2YZL9_CAPAN)
Solyc01g098600	11.5651	17.6468	10.3422	13.8555	11.5829	12.4468	15.6094	14.1705	13.0771	13.3632	1.02188	0.889839	0.968371	Transmembrane protein, putative (DUF1068) (AHRD V3.3 *** F4ITS6_ARATH)
Solyc01g098610	141.205	127.809	104.953	95.8267	58.0171	100.849	125.307	114.735	116.071	95.7689	-1.21199	0.293838	0.703427	glutathione synthetase 2
Solyc01g098630	33.3676	49.8826	66.0356	28.4692	26.8843	28.8581	41.4778	32.9041	42.0588	32.0781	-1.31114	0.204483	0.617008	Mitochondrial inner membrane translocase complex, subunit Tim44-related protein (AHRD V3.3 *** B3H4A1_ARATH)
Solyc01g098650	50.3279	52.1158	45.2837	37.0203	35.0405	41.0622	79.3167	52.4475	45.792	49.4625	1.08015	0.68213	0.904064	GDSL esterase/lipase (AHRD V3.3 *** A0A2G3BUB9_CAPCH)
Solyc01g098690	5.91474	9.195	6.83682	7.23746	8.59173	18.8619	5.38305	8.6161	7.20248	9.3111	1.29276	0.291096	0.700441	Receptor-like protein 12 (AHRD V3.3 *** A0A1J6JWI2_NICAT)
Solyc01g098700	206.581	211.15	232.585	271.529	256.362	340.147	178.159	185.624	229.097	231.735	1.01151	0.939333	0.983531	Branched-chain-amino-acid aminotransferase-like protein.1
Solyc01g098710	23.4224	13.4221	10.2288	14.9802	5.34823	8.0371	6.52808	13.3536	14.8149	7.82391	-1.89355	0.0160599	0.230136	aspartic proteinase-like protein 2 (AHRD V3.3 *** A0A1S4CMW0_TOBAC)
Solyc01g098750	109.828	108.056	158.665	219.809	141.105	159.668	111.98	117.256	142.634	131.147	-1.08758	0.580452	0.870215	RING/U-box superfamily protein (AHRD V3.11 *** tr|A0A2U1KJJ9|A0A2U1KJJ9_ARTAN)
Solyc01g098800	65.5719	69.5215	63.1907	40.9959	101.735	65.4651	49.1604	44.7643	58.6216	61.8738	1.05548	0.766235	0.934953	Cation/calcium exchanger 5 (AHRD V3.11 *** tr|A0A2G3BUD8|A0A2G3BUD8_CAPCH)
Solyc01g098870	144.725	152.959	132.8	151.435	122.516	126.024	166.472	171.369	145.256	144.871	-1.00266	0.980273	0.994228	hypothetical protein (AHRD V3.3 *-* AT1G54920.2)
Solyc01g098900	168.908	169.669	224.65	141.743	178.539	153.022	167.072	130.298	173.806	156.164	-1.11297	0.382742	0.76661	Protein YIPF (AHRD V3.3 *** A0A1U8DU83_CAPAN)
Solyc01g098910	14.4159	30.3529	19.5042	16.7685	25.5812	20.4811	15.9414	15.6407	19.4499	19.0114	-1.02306	0.924721	0.979221	Peroxisomal adenine nucleotide carrier.1
Solyc01g098920	202.722	150.871	207.083	225.159	109.295	170.776	214.365	143.447	194.328	154.781	-1.2555	0.104885	0.480416	Mitochondrial Rho GTPase (AHRD V3.3 *** A0A2G2XZV8_CAPAN)
Solyc01g098950	8.81748	9.5812	6.0184	7.85472	9.90621	9.08835	13.1451	12.9702	7.94957	11.1308	1.40018	0.102486	0.475987	Glyceraldehyde-3-phosphate dehydrogenase (AHRD V3.3 *** A0A2G3C9S8_CAPCH)
Solyc01g098960	33.5356	151.075	176.5	23.2164	83.3292	106.974	8.41683	28.5804	67.501	38.2669	-1.76395	0.344958	0.743001	Hexosyltransferase (AHRD V3.3 *** A0A2G3BUG9_CAPCH)
Solyc01g098980	118.654	283.121	250.663	191.912	273.119	279.927	75.8897	154.133	200.499	172.929	-1.15943	0.618465	0.881792	Mitogen-activated protein kinase kinase kinase NPK1 (AHRD V3.11 *** tr|A0A2G2Y092|A0A2G2Y092_CAPAN)
Solyc01g098990	72.2588	80.6895	50.1308	56.6685	90.3797	124.57	37.1106	73.8005	63.7953	74.5179	1.16808	0.488345	0.822659	DUF1995 domain protein%2C putative (DUF1995) Chr5:9731758-9733644 FORWARD LENGTH=341 201606 (AHRD V3.11 *** AT5G27560.4)
Solyc01g099000	8.07133	9.37622	10.3603	8.47712	13.4185	15.6297	10.377	7.48154	9.02919	11.2961	1.25107	0.218585	0.634658	Pentatricopeptide repeat-containing protein (AHRD V3.3 *** A0A1U8DU99_CAPAN)
Solyc01g099030	7.61178	10.7274	7.20459	11.5087	11.999	11.172	14.0789	11.4316	9.07097	12.1196	1.33609	0.16219	0.571855	GDSL esterase/lipase At5g03980-like (AHRD V3.3 *** A0A1U8DUA9_CAPAN)
Solyc01g099080	13.7763	26.5765	21.2748	9.58327	14.0474	16.2286	4.44052	31.0834	16.5292	13.3186	-1.24106	0.559521	0.858281	GDSL esterase/lipase (AHRD V3.3 *** A0A199UFA2_ANACO)
Solyc01g099090	195.516	180.676	152.396	214.802	141.765	218.674	184.465	146.563	184.405	170.148	-1.0838	0.489346	0.823014	Mannosylglycoprotein endo-beta-mannosidase (AHRD V3.3 *** A0A2G2Y0C1_CAPAN)
Solyc01g099100	135.716	93.411	108.872	89.9378	79.4359	114.729	119.509	154.365	105.553	113.87	1.07879	0.596058	0.874543	Long-chain acyl-CoA synthetase 6 (AHRD V3.3 *** A0A2U1MVC5_ARTAN)
Solyc01g099120	13.0963	17.2762	12.892	16.5035	8.65825	14.3333	28.0525	24.9586	14.8123	17.1689	1.15909	0.588631	0.872474	Protein AUXIN RESPONSE 4 (AHRD V3.3 *-* A0A2G2Y0B6_CAPAN)
Solyc01g099130	61.1772	57.9657	67.1639	54.7984	59.5433	82.4618	74.3764	80.2143	60.1058	73.5687	1.22399	0.0820257	0.439765	LysM domain-containing protein/F-box-like domain-containing protein (AHRD V3.3 *** A0A1Q3B5K4_CEPFO)
Solyc01g099140	19.9738	20.6156	30.1815	20.3875	19.2507	14.834	29.5423	20.6939	22.4358	20.4408	-1.0976	0.64942	0.893002	Vacuole membrane protein KM.1
Solyc01g099160	181.025	111.048	170.132	188.863	230.548	221.792	347.548	236.298	159.421	254.564	1.5968	0.00402442	0.131166	Lipoxygenase (AHRD V3.11 *** tr|Q9FT17|Q9FT17_SOLLC)
Solyc01g099210	20.1123	32.5895	21.1713	44.3583	35.228	42.3209	18.845	28.4692	28.0101	29.9057	1.06767	0.790044	0.942567	Lipoxygenase (AHRD V3.3 *** K4B0V8_SOLLC)
Solyc01g099220	31.9321	29.8887	31.4522	36.88	69.7714	93.319	13.7144	58.5881	32.4373	47.8254	1.4744	0.276192	0.692273	DNA polymerase (AHRD V3.3 *** A0A2G3AW20_CAPCH)
Solyc01g099230	53.6236	47.5259	43.5197	68.4069	41.3508	26.2389	50.2607	37.0043	52.4829	37.6901	-1.39248	0.0634434	0.397032	Zinc finger protein VAR3, chloroplastic (AHRD V3.3 *-* A0A1J3GSM9_NOCCA)
Solyc01g099260	12.9854	10.0546	11.5879	12.0871	10.7432	15.8846	13.8044	14.9676	11.6289	13.7031	1.17837	0.244881	0.663341	Chaperone protein DnaJ (AHRD V3.3 *** A0A1J3IQ23_NOCCA)
Solyc01g099270	50.3298	59.1633	56.1573	59.0889	48.2115	66.0919	28.1681	44.7822	56.0657	44.7755	-1.25215	0.207242	0.619882	Microtubule-binding protein TANGLE.1
Solyc01g099280	126.428	105.318	123.004	111.258	78.4325	99.2562	147.161	76.1168	116.185	96.6344	-1.20231	0.209863	0.623288	Sucrose nonfermenting 4-like protein (AHRD V3.3 *** A0A1U8DUB7_CAPAN)
Solyc01g099300	88.5507	56.0444	118.737	88.945	138.394	141.968	93.0896	122.964	85.086	122.46	1.43926	0.0249955	0.278903	ATPase, histidine kinase, DNA gyrase B-, and HSP90-like domain containing protein, expressed (AHRD V3.3 *** Q33AG5_ORYSJ)
Solyc01g099310	26.8751	21.031	25.9127	23.8098	17.0542	24.9563	13.4043	26.2038	24.3008	19.6632	-1.23585	0.396741	0.774592	cyclinH1_1
Solyc01g099380	76.6156	74.5066	52.9943	77.4186	54.9804	60.2014	88.3089	65.4274	69.5659	66.1294	-1.05197	0.698696	0.911343	SART.1
Solyc01g099400	23.6947	34.4661	25.5753	29.1809	30.1555	28.8155	40.6116	39.4756	27.9409	34.3552	1.22957	0.192034	0.60457	WD-40 repeat containing protein (AHRD V3.3 *** A0A0K0XR34_TOBAC)
Solyc01g099420	14.767	19.8281	21.3103	22.1278	38.6404	32.0548	10.1757	21.4461	19.2764	22.8014	1.18287	0.498117	0.826675	Unknown protein
Solyc01g099430	6.00349	9.3673	4.39376	5.74047	29.7422	45.0264	10.4247	6.2288	6.13692	17.1722	2.79819	0.0145065	0.222356	#N/A
Solyc01g099440	34.5795	77.2151	17.9217	39.5609	108.59	50.2159	31.0184	77.8818	37.093	60.2451	1.62417	0.224687	0.640819	ATP-dependent DNA helicase (AHRD V3.11 *-* tr|A0A2G2XW06|A0A2G2XW06_CAPAN)
Solyc01g099460	111.351	189.489	138.234	104.72	313.997	323.115	79.1633	212.087	132.2	203.156	1.53674	0.167603	0.581761	#N/A
Solyc01g099470	21.9911	20.1144	15.5699	23.0052	48.8507	68.7097	20.1039	37.9331	19.9511	39.9988	2.00484	0.00654971	0.156818	ATP-dependent DNA helicase (AHRD V3.3 *-* A0A2G2XW06_CAPAN)
Solyc01g099480	41.2177	63.707	66.8042	41.0313	70.8695	77.4061	7.66963	34.3825	51.7962	34.6806	-1.49352	0.353191	0.746839	ATP-dependent DNA helicase (AHRD V3.3 *-* A0A2G2XW06_CAPAN)
Solyc01g099520	258.116	291.859	187.257	227.547	351.101	264.105	293.814	257.365	238.026	289.373	1.21572	0.107675	0.48829	Rapid alkalinization factor (AHRD V3.3 *** RALF_TOBAC)
Solyc01g099540	1557.69	1920.71	1750.43	1505.36	2083.17	2412.96	953.911	1693.05	1675.65	1687.96	1.00735	0.972066	0.991766	NTM19 protein (AHRD V3.3 *** O24140_TOBAC)
Solyc01g099560	108.205	102.777	184.441	122.65	161.907	104.965	109.965	159.541	125.941	131.404	1.04338	0.824925	0.952729	(+)-neomenthol dehydrogenase-like (AHRD V3.3 *** A0A2I4G5H1_9ROSI)
Solyc01g099570	280.492	100.939	227.908	319.39	191.771	17.8753	452.352	367.224	213.066	154.476	-1.37929	0.567123	0.862057	Desiccation-related protein PCC13-62 (AHRD V3.3 *-* A0A2G2W7R3_CAPBA)
Solyc01g099580	68.2319	29.3181	34.4148	81.491	93.6928	13.2558	135.032	104.12	48.6681	64.6428	1.32824	0.516131	0.834994	Cysteine/Histidine-rich .1
Solyc01g099620	290.091	289.547	197.582	382.676	197.754	183.205	228.657	179.436	282.298	196.354	-1.4377	0.0254415	0.278903	Respiratory burst oxidase-like protein (AHRD V3.3 *** C1IHQ9_9ROSI)
Solyc01g099630	293.898	318.857	307.386	260.103	219.125	223.052	215.248	230.714	294.208	221.962	-1.32549	0.000840021	0.0649926	#N/A
Solyc01g099660	23.8522	33.2274	27.2237	30.6721	20.7794	18.003	26.4637	28.0298	28.5219	22.9516	-1.2427	0.263897	0.682247	Heat shock protein 70 family (AHRD V3.3 *** A0A200QCN5_9MAGN)
Solyc01g099690	150.616	146.809	133.721	112.776	162.047	105.538	154.278	152.589	135.133	141.651	1.04824	0.69595	0.910636	ATP-dependent Clp protease proteolytic subunit (AHRD V3.3 *** A0A1U8E4F5_CAPAN)
Solyc01g099720	54.007	53.7935	57.0808	32.6466	54.8124	50.6694	40.8784	71.8112	48.2366	53.4352	1.10777	0.569083	0.862459	#N/A
Solyc01g099740	100.252	105.385	70.9271	127.501	73.1056	56.142	78.9651	93.1512	98.8666	74.1251	-1.33378	0.0782533	0.431944	U6 snRNA-associated Sm-like protein LSm4 (AHRD V3.3 *-* A0A328E599_9ASTE)
Solyc01g099750	10.1325	28.4501	14.6119	28.1582	17.365	13.6602	8.87556	20.7852	18.5578	14.4634	-1.28309	0.437705	0.795103	Heparan-alpha-glucosaminide N-acetyltransferase-like protein (DUF1624) (AHRD V3.3 *** Q94CC1_ARATH)
Solyc01g099780	17.747	19.9883	17.6564	15.3727	17.0963	14.1081	26.9259	19.4451	17.6152	18.8511	1.07016	0.683947	0.904947	Translationally controlled tumor protein (AHRD V3.3 *** U3SXQ9_NICBE)
Solyc01g099810	35.9843	56.0166	60.82	47.5204	133.341	128.831	84.9007	80.352	49.1291	104.045	2.11779	0.000401866	0.0464505	Serine/arginine-rich-splicing factor SR34 (AHRD V3.3 *-* A0A0M9UMW1_NICAT)
Solyc01g099830	18.6989	18.798	20.2243	13.5342	12.0528	12.7104	17.1856	15.452	17.612	14.202	-1.24011	0.14772	0.553326	60S ribosomal protein L22 (AHRD V3.3 *** A0A1Y1HUA2_KLENI)
Solyc01g099840	14.7367	18.0198	16.2558	34.1379	21.611	30.273	28.2824	32.2078	19.5929	27.7845	1.41809	0.0905988	0.457743	Dormancy/auxin associated protein (AHRD V3.3 *** A0A2K3MXX9_TRIPR)
Solyc01g099870	26.9916	39.7276	65.9473	32.5584	40.8907	68.6595	40.4814	22.7647	38.9534	40.1061	1.02959	0.902476	0.9717	Bidirectional sugar transporter SWEET (AHRD V3.11 *** tr|A0A1U8DUK6|A0A1U8DUK6_CAPAN)
Solyc01g099910	28.109	17.0387	29.2142	19.2704	38.2386	28.3025	63.6925	29.1628	22.7872	37.654	1.65242	0.0347565	0.317703	Alpha/beta-Hydrolases superfamily protein (AHRD V3.11 *** tr|Q9M9W5|Q9M9W5_ARATH)
Solyc01g099920	8.48275	7.04161	8.65374	5.14282	7.70801	6.4596	11.614	5.7939	7.18048	7.60808	1.05955	0.82884	0.954144	PAR1-like protein (AHRD V3.11 *** tr|A0A2U1KIG3|A0A2U1KIG3_ARTAN)
Solyc01g099950	15.8249	11.1175	10.7327	37.8327	16.2303	7.09144	39.5702	26.5531	16.3487	18.6482	1.14065	0.716716	0.917053	Pectinesterase (AHRD V3.3 *** A0A2G2W853_CAPBA)
Solyc01g099970	35.8511	59.056	62.6057	32.7486	133.127	173.465	11.8585	76.8413	45.645	67.7291	1.48382	0.401145	0.776755	F-box family protein (AHRD V3.3 *** A0A2U1M1I9_ARTAN)
Solyc01g099980	27.5132	33.6923	22.5948	12.4537	49.5453	49.4585	14.4992	23.1947	22.5993	30.1296	1.33321	0.382337	0.76661	Enolase (DUF1399) (AHRD V3.3 *-* F4I3L9_ARATH)
Solyc01g100030	78.13	58.0075	75.4395	46.6323	31.1709	33.441	43.5437	34.0208	63.1898	35.2512	-1.79255	0.00180162	0.09598	1 deoxyuridine triphosphatase
Solyc01g100060	94.2305	115.947	123.073	108.043	126.666	90.6764	136.798	113.404	109.787	115.536	1.05236	0.731907	0.920454	Pre-mRNA-splicing factor 38A (AHRD V3.11 *-* tr|A0A1U8E4K1|A0A1U8E4K1_CAPAN)
Solyc01g100070	12.543	17.8697	6.92339	20.0213	18.3746	25.6058	10.133	16.9227	13.2765	16.8535	1.26943	0.402752	0.777117	transmembrane protein (AHRD V3.3 --* NP_175330.1)
Solyc01g100080	54.3002	41.7895	46.0023	55.0866	31.7598	44.6359	46.6967	55.1565	48.9693	43.7131	-1.12024	0.432462	0.793633	Single-stranded DNA-binding protein, mitochondrial (AHRD V3.3 *** A0A2G2V7W4_CAPBA)
Solyc01g100110	65.1516	75.346	55.7999	79.8206	42.917	46.2349	94.4119	68.737	68.3807	59.9038	-1.14151	0.49192	0.824645	Protein phosphatase 2C family protein (AHRD V3.3 *** A0A2U1PE44_ARTAN)
Solyc01g100120	5.53507	27.0734	6.67111	8.63785	20.8963	21.5388	6.41192	8.46465	9.63979	12.5018	1.29689	0.513276	0.833676	Kinesin-like protein (AHRD V3.3 *** A0A2G2XY75_CAPAN)
Solyc01g100130	222.057	237.556	202.853	190.419	184.891	263.728	267.011	273.326	212.462	244.242	1.14958	0.237034	0.654868	Zinc finger protein (AHRD V3.3 *-* A0A200PWL1_9MAGN)
Solyc01g100140	40.6914	45.7008	28.1463	34.063	44.2901	89.5198	41.4628	80.1504	36.5412	60.2487	1.64879	0.0232871	0.271851	Dehydration-induced 19-like protein (AHRD V3.3 *** E3T7S4_GOSHI)
Solyc01g100170	36.1982	53.578	44.5283	24.7872	48.4702	29.8934	44.7078	75.7606	38.2502	47.0673	1.23051	0.330643	0.730395	Syntaxin (AHRD V3.3 *** A0A2G3AXP6_CAPCH)
Solyc01g100190	43.4304	40.619	46.5435	57.2891	77.3532	92.8886	33.9177	53.1938	46.5708	60.0043	1.28845	0.311654	0.719237	Protein misato 1-like (AHRD V3.11 *** tr|A0A2K3NYQ0|A0A2K3NYQ0_TRIPR)
Solyc01g100220	33.2456	39.6308	21.5594	28.7916	46.0152	41.6569	21.792	33.1726	30.0723	34.3096	1.1409	0.471578	0.813724	GATA transcription factor 23 (AHRD V3.3 *** A0A2G3AXR3_CAPCH)
Solyc01g100230	18.9721	20.4578	18.5785	24.4715	20.4734	22.1011	22.7087	29.7229	20.4956	23.5084	1.14699	0.321709	0.724879	DnaJ-like protein subfamily B member 6 (AHRD V3.3 *** A0A2G2V7W8_CAPBA)
Solyc01g100250	30.2684	33.6724	31.3787	31.992	33.1566	29.5406	27.3277	26.9745	31.8042	29.1498	-1.09106	0.429845	0.792036	Protein TRIGALACTOSYLDIACYLGLYCEROL 1, chloroplastic (AHRD V3.3 *** A0A2G2ZTJ6_CAPAN)
Solyc01g100280	7.04256	10.871	12.2827	20.9354	9.79312	22.8	12.6146	15.4982	11.8452	14.4545	1.22028	0.472007	0.813724	RNA helicase DEAH-box4
Solyc01g100290	37.6795	26.5585	30.5308	12.3904	25.497	9.66523	25.3123	28.3766	24.8046	20.5115	-1.2093	0.503429	0.829487	GPI-anchored adhesin-like protein (AHRD V3.3 *** Q9M2F2_ARATH)
Solyc01g100310	65.4682	76.2984	67.8699	70.7057	45.0729	42.2265	41.372	80.7767	69.9712	50.2196	-1.3933	0.0534374	0.371029	DUF1645 family protein (AHRD V3.11 *-* tr|G7I9G3|G7I9G3_MEDTR)
Solyc01g100320	714.029	688.856	723.804	804.391	573.269	537.934	499.945	490.4	731.532	524.373	-1.39506	0.000110883	0.0237505	Disulfide-isomerase-like protein (AHRD V3.3 *** B3TLY7_ELAGV)
Solyc01g100330	61.2146	73.3542	83.5219	56.3424	46.5295	61.2892	96.3069	57.7823	67.7999	63.1162	-1.07421	0.730281	0.919937	Zinc finger matrin-type protein 2 (AHRD V3.3 *** A0A1U8DUS0_CAPAN)
Solyc01g100360	268.325	321.793	283.695	230.054	371.423	351.749	161.359	267.178	273.987	273.951	-1.00013	0.999412	0.999589	Dihydrolipoyl dehydrogenase (AHRD V3.3 *** A0A2U1LTA9_ARTAN)
Solyc01g100370	16.7049	9.63629	8.23993	8.81028	8.76386	6.61463	8.19508	7.4903	10.3972	7.72348	-1.34618	0.0999704	0.473284	Adenine nucleotide alpha hydrolases-like superfamily protein (AHRD V3.3 *** A0A2U1PDN0_ARTAN)
Solyc01g100380	680.552	763.343	901.17	554.321	291.668	283.808	333.343	319.391	713.736	306.395	-2.32946	9.23041e-07	0.002561	Calreticulin (AHRD V3.3 *** A0A2G3AWT5_CAPCH)
Solyc01g100400	16.742	13.2664	18.7085	15.6879	11.9539	16.6801	9.14959	23.5033	15.9787	14.39	-1.1104	0.590005	0.872474	Pseudouridine synthase (AHRD V3.3 *** A0A200PWH1_9MAGN)
Solyc01g100420	33.6109	24.3719	32.8132	30.3852	18.9577	20.3502	40.2014	15.8635	30.0622	22.2715	-1.34981	0.222086	0.636381	Peptide chain release factor 2 (AHRD V3.3 *** B6SY98_MAIZE)
Solyc01g100430	62.3936	67.5885	70.849	56.9048	58.8024	48.5179	61.0062	46.5324	64.2131	53.3466	-1.2037	0.088705	0.452518	rRNA adenine N(6)-methyltransferase (AHRD V3.3 *** A0A2G3AWT6_CAPCH)
Solyc01g100480	45.8694	69.8641	59.6972	47.8684	66.3316	82.2987	19.9384	50.3706	55.0104	48.3888	-1.13684	0.66545	0.900354	hypothetical protein (AHRD V3.3 *** AT1G56423.1)
Solyc01g100490	7.77497	8.37587	6.78346	8.83224	11.5071	8.36055	13.7743	7.2787	7.90338	9.91017	1.25392	0.190411	0.602669	#N/A
Solyc01g100500	22.8024	30.1518	39.4629	34.6819	37.7201	34.9314	31.8314	36.2238	31.1456	35.1083	1.12723	0.671476	0.902531	microfibrillar-associated protein 1-like (AHRD V3.3 *** A0A2I4G8F8_9ROSI)
Solyc01g100540	11.5436	10.0604	11.9065	13.5544	8.41815	11.8875	7.57062	8.83667	11.7005	9.04548	-1.29352	0.0935967	0.462619	HIT zinc finger and PAPA-1-like domain-containing protein (AHRD V3.3 *-* Q8GYE3_ARATH)
Solyc01g100570	775.548	677.279	892.833	846.561	652.694	546.32	723.548	667.038	793.782	644.086	-1.23242	0.0326903	0.307149	Nucleolar protein 56 (AHRD V3.3 *** A0A1U8DUW6_CAPAN)
Solyc01g100580	25.3519	26.2637	25.8836	24.2031	14.0032	18.2393	27.1063	22.0501	25.4135	19.7665	-1.28569	0.135478	0.534646	Pentatricopeptide repeat (AHRD V3.3 *** A0A200R237_9MAGN)
Solyc01g100590	59.9418	63.9295	80.8058	86.359	57.5148	48.218	62.8335	49.7386	71.911	54.2586	-1.32534	0.0406386	0.332212	Heme binding protein (AHRD V3.3 *** Q9LZQ3_ARATH)
Solyc01g100610	142.931	143.775	91.7638	128.033	105.935	120.967	77.5413	168.635	124.652	113.775	-1.0956	0.561526	0.859293	Solute carrier family 40 protein (AHRD V3.3 *** A0A1U8E683_CAPAN)
Solyc01g100630	10.8868	20.1383	10.4683	14.4967	18.9831	73.5715	5.67757	10.6524	13.5057	17.0479	1.26228	0.600723	0.875919	Catalase (AHRD V3.3 *-* S8E1K9_9LAMI)
Solyc01g100640	12.1164	22.3375	11.9706	21.7001	71.2412	86.3597	11.3204	22.7647	16.2835	35.4847	2.17919	0.057097	0.382127	Catalase (AHRD V3.3 *-* K0IBB4_NICBE)
Solyc01g100650	77.5341	38.8666	36.7901	18.6606	75.7594	81.413	70.0827	57.7496	37.9255	70.6842	1.86376	0.02188	0.263731	NHL repeat-containing protein 2-like (AHRD V3.3 *** A0A2K3NND0_TRIPR)
Solyc01g100660	193.546	198.593	199.713	231.063	308.297	338.428	290.538	308.783	205.221	311.045	1.51566	0.000110709	0.0237505	#N/A
Solyc01g100690	162.123	179.692	183.132	205.216	117.375	121.027	192.898	201.5	181.902	153.291	-1.18665	0.245858	0.664848	transmembrane protein (AHRD V3.3 --* AT4G01960.2)
Solyc01g100710	15.4639	14.1637	20.9112	20.0418	10.2757	17.2217	18.7785	22.7034	17.4062	16.5733	-1.05025	0.784508	0.940193	#N/A
Solyc01g100730	95.8445	124.996	106.901	102.121	150.917	122.427	50.3692	87.7444	106.94	95.0605	-1.12497	0.643704	0.890022	Rhodanese-like domain-containing protein 6 (AHRD V3.3 *** A0A1U8DXD0_CAPAN)
Solyc01g100740	40.3722	50.8574	43.4368	72.0872	87.8845	70.9287	46.0486	67.7494	50.3545	66.4071	1.31879	0.238514	0.655941	Xaa-pro aminopeptidase (AHRD V3.3 *** A0A1J9S034_9PEZI)
Solyc01g100750	472.681	148.966	113.944	55.3992	83.3934	70.0872	739.963	437.988	145.198	208.622	1.43681	0.496746	0.826584	DUF538 domain-containing protein (AHRD V3.3 *** A0A1Q3CLQ5_CEPFO)
Solyc01g100770	62.1984	65.4022	70.3288	101.718	90.4296	114.848	46.7154	85.7152	73.4472	80.3041	1.09336	0.647162	0.892073	DUF538 domain-containing protein (AHRD V3.11 *** tr|A0A1Q3CLQ5|A0A1Q3CLQ5_CEPFO)
Solyc01g100780	35.4988	22.7401	26.4238	24.8572	20.1519	19.4295	31.9694	28.4903	26.9844	24.4372	-1.10423	0.519548	0.836521	Agenet-like domain-containing protein (AHRD V3.3 *** A0A2U1NB46_ARTAN)
Solyc01g100800	14.7822	16.2776	13.092	12.8267	9.96652	18.5886	14.6584	14.3469	14.1779	14.0494	-1.00915	0.958752	0.988055	Pentatricopeptide repeat (AHRD V3.3 *** A0A200R1X0_9MAGN)
Solyc01g100810	15.8785	15.7026	16.7093	7.92682	16.3026	26.7308	13.1041	24.8938	13.4806	19.4174	1.4404	0.120623	0.513087	Neutral/alkaline invertase (AHRD V3.3 *** V5N4X0_MANES)
Solyc01g100820	66.8818	60.5902	49.4333	54.382	79.8218	74.4416	51.7665	64.7685	57.4508	66.8094	1.1629	0.205321	0.617112	AP-3 complex subunit mu (AHRD V3.3 *** A0A2G2V6N1_CAPBA)
Solyc01g100840	35.835	53.3088	32.2995	26.4423	49.7314	51.0319	38.3096	49.0239	35.7397	46.7247	1.30736	0.120794	0.513087	Trafficking protein particle complex subunit 4 (AHRD V3.3 *** A0A1U8GQD3_CAPAN)
Solyc01g100880	10.3123	10.6279	9.92179	9.64338	6.94589	6.64706	5.37119	7.08762	10.1194	6.47489	-1.56287	0.0128924	0.212555	WAT1-related protein (AHRD V3.11 *** tr|K4B1B9|K4B1B9_SOLLC)
Solyc01g100920	21.8646	34.1478	17.6958	11.6126	18.6262	7.76692	22.4485	12.1058	19.7914	14.0812	-1.40552	0.27829	0.69386	WAT1-related protein (AHRD V3.3 *** K4B1C3_SOLLC)
Solyc01g100950	37.6576	62.6318	23.2842	50.9282	62.0167	53.5488	29.3205	49.6048	40.8947	46.8801	1.14636	0.533838	0.84511	#N/A
Solyc01g101000	1402.69	1616.69	1989.02	1428.59	1420.81	1485.5	1820.06	1838.86	1593.25	1630.27	1.02324	0.793537	0.943332	Protein kinase domain (AHRD V3.3 *** A0A200QSW1_9MAGN)
Solyc01g101010	7.64712	5.42151	10.3851	5.81177	18.9227	13.4082	11.1477	14.6146	7.07269	14.2587	2.01603	0.00326772	0.119718	RNA polymerase II subunit .1
Solyc01g101030	62.4229	58.4777	63.1289	51.7969	44.0234	38.9677	50.9433	33.5469	58.7782	41.3792	-1.42048	0.015964	0.230136	FACT complex subunit SPT16 (AHRD V3.3 *** A0A2G3AVE2_CAPCH)
Solyc01g101040	389.051	421.545	455.931	308.769	477.553	473.64	205.146	381.67	389.803	364.801	-1.06854	0.69073	0.909026	ATP-citrate synthase (AHRD V3.3 *** B6TD54_MAIZE)
Solyc01g101060	756.035	784.659	743.878	827.313	740.94	927.644	1086.27	1108.98	777.318	953.908	1.22718	0.0292448	0.292889	S-adenosyl-L-methionine synthetase
Solyc01g101070	23.1709	12.0032	18.4847	7.91532	20.5502	9.29928	18.001	16.455	14.203	15.4246	1.08601	0.755989	0.932652	ABC transporter-like (AHRD V3.3 *** A0A200R1R9_9MAGN)
Solyc01g101090	52.1378	27.8707	32.1647	54.1592	72.602	41.9796	52.9796	54.5217	39.8876	54.4711	1.36561	0.14668	0.551921	Ypt/Rab-GAP domain of gyp1p superfamily protein (AHRD V3.3 *** A0A1I9LLP9_ARATH)
Solyc01g101110	4.90684	2.927	14.0474	64.6318	9.56847	19.8079	4.04459	37.399	10.686	13.0123	1.21769	0.755304	0.93259	Serine/threonine-protein kinase haspin (AHRD V3.3 *** A0A146F677_TOBAC)
Solyc01g101120	49.2164	28.2265	35.3378	59.3986	37.5341	23.5244	35.1628	40.1893	41.3234	33.4222	-1.23641	0.32956	0.729494	Carbohydrate-binding X8 domain superfamily protein (AHRD V3.3 *-* F4I0Z2_ARATH)
Solyc01g101130	51.7176	58.8492	70.4698	69.7129	68.391	58.6613	77.1851	74.2907	62.1833	69.2555	1.11373	0.412778	0.782072	Myosin heavy chain, cardiac protein (AHRD V3.3 *** A0A2P5D8H8_PARAD)
Solyc01g101140	64.784	94.7941	46.2023	66.8748	62.9315	62.0564	110.998	114.483	66	83.932	1.2717	0.288258	0.699875	Endonuclease or glycosyl hydrolase (AHRD V3.3 *-* A0A2U1M909_ARTAN)
Solyc01g101250	41.0424	26.547	25.5043	21.3929	29.2428	24.5255	50.709	48.9593	27.7673	36.5291	1.31555	0.233328	0.651781	G-patch domain-containing protein (AHRD V3.3 *** A0A1Q3DGV7_CEPFO)
Solyc01g102290	18.669	14.6636	14.5364	15.0839	14.5326	14.8349	35.0947	13.1937	15.6525	17.7749	1.1356	0.537927	0.846892	Low temperature and salt responsive protein (AHRD V3.3 *** Q8H9B8_SOLTU)
Solyc01g102300	41.9936	68.8162	38.8836	86.6306	48.9664	53.9116	55.0702	77.8818	55.857	58.0074	1.0385	0.828131	0.954019	bHLH transcription factor 006
Solyc01g102320	6.64393	4.61064	5.60284	7.05381	8.61883	5.2011	18.5968	10.0677	5.89867	9.57145	1.62264	0.0707239	0.41626	F-box domain (AHRD V3.3 *** A0A200Q5Q6_9MAGN)
Solyc01g102350	22.9806	7.16154	10.9423	5.79441	7.1245	10.1272	25.268	12.4735	10.107	12.2801	1.21501	0.57163	0.864386	Pectin acetylesterase (AHRD V3.3 *** K4B1G3_SOLLC)
Solyc01g102370	25.6787	74.7011	21.731	66.7661	74.9942	78.3608	37.0129	15.3909	40.8445	42.7746	1.04725	0.902972	0.971828	Flap endonuclease.1
Solyc01g102410	22.7365	26.1843	17.1275	8.75494	15.6364	8.28054	24.7655	13.8273	17.2853	14.5109	-1.1912	0.509245	0.831435	Glutamine--tRNA ligase (AHRD V3.3 *** A0A2I0WQV3_9ASPA)
Solyc01g102490	135.436	185.108	140.687	171.009	186.506	130.351	67.2703	227.658	156.714	138.909	-1.12818	0.611997	0.879526	NADPH:adrenodoxin oxidoreductase, mitochondrial (AHRD V3.3 *** A0A2G2XXN3_CAPAN)
Solyc01g102510	204.289	184.473	198.015	155.269	181.61	244.088	159.012	144.997	184.498	178.8	-1.03186	0.804436	0.946232	Transducin/WD40 repeat-like superfamily protein (AHRD V3.3 *** F4KIH8_ARATH)
Solyc01g102530	62.0903	114.502	83.1732	53.29	82.2674	128.597	36.0808	68.3349	74.9232	71.4652	-1.04839	0.840673	0.956154	SNARE associated Golgi protein (AHRD V3.11 *** tr|A0A200R1H8|A0A200R1H8_9MAGN)
Solyc01g102550	73.7028	96.5116	63.1659	62.7352	99.7467	81.4613	81.4273	73.4575	72.8642	83.4957	1.14591	0.353613	0.747179	nuclear pore complex protein NUP160 isoform X4 (AHRD V3.3 *-* A0A2I4G5Z6_9ROSI),Pfam:PF11715
Solyc01g102590	9.25677	9.01719	7.45318	8.24385	10.0459	7.45524	15.7529	19.3228	8.46254	12.2877	1.45201	0.0997306	0.473284	Eukaryotic translation initiation factor 3 subunit C (AHRD V3.3 *-* A0A2G2W8F5_CAPBA)
Solyc01g102610	148.746	116.682	142.335	139.111	170.098	148.884	227.62	179.099	136.154	179.252	1.31653	0.0185205	0.243705	Ferric reduction oxidase 6 (AHRD V3.3 *** A0A2G3BUN6_CAPCH)
Solyc01g102620	20.7947	42.1505	62.7236	49.321	143.823	165.623	15.6598	53.2991	40.5793	66.7751	1.64555	0.287833	0.699875	Unknown protein
Solyc01g102630	144.871	202.828	200.185	136.046	303.96	365.76	40.8432	140.25	168.193	158.858	-1.05876	0.884111	0.966284	DNA mismatch repair protein MLH3 (AHRD V3.3 *-* A0A2G2XFY3_CAPBA)
Solyc01g102650	108.215	95.8606	55.9486	74.6	96.2951	163.541	57.649	83.3423	81.1174	93.2658	1.14976	0.514819	0.833851	Unknown protein
Solyc01g102670	21.2017	25.1695	26.2801	10.925	17.4175	11.2948	9.41943	8.7288	19.7844	11.2774	-1.75434	0.0747392	0.425159	DNA glycosylase (AHRD V3.3 *** A0A2U1MY08_ARTAN)
Solyc01g102680	64.651	150.503	65.7029	68.3104	261.562	301.79	30.1516	94.2322	81.292	122.376	1.50539	0.40958	0.780302	Protein kinase-like domain-containing protein (AHRD V3.3 *** A0A2U1P0D3_ARTAN)
Solyc01g102700	147.611	154.82	142.183	199.005	159.712	106.741	113.618	138.874	159.464	128.066	-1.24517	0.0781591	0.431847	Leucine-rich repeat receptor-like protein kinase.1
Solyc01g102710	58.6622	25.2729	13.9686	16.6358	10.2881	5.74862	34.1556	27.6755	24.2271	15.3768	-1.57557	0.317289	0.722404	Leucine-rich repeat receptor-like protein kinase.1
Solyc01g102720	11.2816	21.9915	7.81028	16.7244	10.0125	16.8224	18.136	16.7085	13.4172	15.0306	1.12025	0.646769	0.891805	Polyketide cyclase/dehydrase and lipid transport superfamily protein (AHRD V3.3 *** A0A2U1QGT1_ARTAN)
Solyc01g102730	43.0263	25.4546	34.7256	55.0393	36.6578	38.579	61.7131	29.9047	38.0369	40.1938	1.0567	0.831863	0.954144	NAD(P)-binding Rossmann-fold superfamily protein (AHRD V3.3 *** Q9ZVQ2_ARATH)
Solyc01g102750	26.988	25.2011	21.0758	17.0305	26.9134	20.2481	27.0588	27.1577	22.228	25.1558	1.13172	0.399564	0.776354	PHD finger protein ALFIN-LIKE 6 (AHRD V3.3 *** A0A2G2XXF4_CAPAN)
Solyc01g102760	45.0185	25.7111	26.0597	39.8934	34.4144	26.2699	31.3482	37.8579	33.1204	32.1841	-1.02909	0.870856	0.96386	PHD finger protein ALFIN-LIKE 8 (AHRD V3.3 *** A0A1U8DXM3_CAPAN)
Solyc01g102790	15.5607	9.79861	10.4672	12.6294	14.311	8.87636	13.8161	10.1994	11.9152	11.5669	-1.03011	0.860566	0.961434	Pentatricopeptide repeat-containing protein (AHRD V3.3 *** A0A1U8E6I7_CAPAN)
Solyc01g102800	129.609	159.307	170.994	176.152	86.5224	92.9736	151.736	113.191	157.919	108.417	-1.45659	0.099642	0.473284	Histidine--tRNA ligase, cytoplasmic (AHRD V3.3 *** A0A2G3BUL7_CAPCH)
Solyc01g102820	88.8475	104.57	119.24	42.8041	115.245	145.849	50.2804	83.7358	82.9832	91.719	1.10527	0.717234	0.917053	2-C-methyl-D-erythritol 4-phosphate cytidylyltransferase (AHRD V3.3 *** A9ZN09_HEVBR)
Solyc01g102840	7.82343	21.1216	13.0729	12.8414	6.39548	9.0329	7.63881	9.17882	12.9056	7.97771	-1.6177	0.0310716	0.301026	Disease resistance protein (TIR-NBS-LRR class) (AHRD V3.3 *** A0A2U1NT16_ARTAN)
Solyc01g102910	42.0114	54.2131	70.1249	43.9585	42.1247	54.67	32.1247	24.5656	51.475	36.7166	-1.40195	0.0937382	0.462619	Germin-like protein subfamily 1 member (AHRD V3.11 *** tr|A0A2K3JPE5|A0A2K3JPE5_TRIPR)
Solyc01g102950	16.5187	27.6373	28.2815	24.8972	17.528	64.3432	32.8879	43.2429	23.8112	35.5874	1.49457	0.121844	0.514048	Lycopene beta/epsilon cyclase protein (AHRD V3.3 *** A0A2U1QDC2_ARTAN)
Solyc01g103010	31.6225	16.2384	14.3649	16.7244	7.99446	42.0531	13.7685	30.7916	18.7412	19.4302	1.03676	0.926863	0.979221	Cullin-associated NEDD8-dissociated protein.1
Solyc01g103020	66.4072	99.2875	108.028	92.7862	80.901	73.3136	62.2995	107.283	90.1639	79.3485	-1.1363	0.355322	0.747986	nucleic acid binding/RNA binding protein (AHRD V3.3 *** AT2G02570.4)
Solyc01g103030	12.0844	19.3435	11.8012	20.3094	14.3725	18.845	15.2516	16.6136	15.3849	16.1855	1.05204	0.757156	0.932923	Major facilitator superfamily protein (AHRD V3.3 *** A0A2U1PWN6_ARTAN)
Solyc01g103070	18.6019	26.9027	23.8328	22.4833	27.0596	22.1357	20.6706	27.1696	22.756	24.0831	1.05832	0.692513	0.909933	homeobox protein (AHRD V3.3 -** AT4G24265.3)
Solyc01g103080	179.291	170.763	160.068	187.997	104.934	140.356	239.374	215.733	174.222	166.068	-1.0491	0.774926	0.937265	ATP-dependent RNA helicase (AHRD V3.3 *** A0A0U9HKI9_KLENI)
Solyc01g103100	84.0357	103.166	54.3003	55.8921	86.4073	81.0521	136.419	128.927	71.6206	105.35	1.47094	0.0431424	0.339471	NAD(P)-binding Rossmann-fold superfamily protein (AHRD V3.3 *** A0A2U1N9F9_ARTAN)
Solyc01g103110	30.1092	67.2755	62.7243	33.9822	49.7722	128.777	28.0796	52.6944	45.5838	55.4939	1.2174	0.512198	0.833027	GNAT family N-acetyltransferase (AHRD V3.3 *** A0A248JVD2_9PROT)
Solyc01g103120	8.04339	8.4721	12.6929	11.7933	11.2375	7.45917	17.039	9.48088	10.0498	10.7873	1.07339	0.713689	0.916219	Dynamin-2B (AHRD V3.3 *** A0A2G2W8L1_CAPBA)
Solyc01g103140	17.7391	20.8985	26.7611	27.9133	20.3961	60.6268	11.4625	18.2517	22.9398	22.5527	-1.01716	0.953762	0.987293	Chloride channel protein (AHRD V3.3 *** K4B1P0_SOLLC)
Solyc01g103150	9.35989	9.53311	8.85556	7.00367	8.62072	14.945	5.50669	11.7836	8.62505	9.56208	1.10864	0.619626	0.881792	Core-2 i-branching beta-n-acetylglucosaminyltransferase family protein (AHRD V3.3 *** A0A2K3MN76_TRIPR)
Solyc01g103160	100.821	79.4519	92.8516	77.6318	59.935	52.7648	87.8904	81.7284	87.1707	69.0375	-1.26266	0.0992071	0.472848	Pentatricopeptide repeat-containing protein (AHRD V3.3 *** A0A2G2Y1S8_CAPAN)
Solyc01g103180	31.0106	29.6116	45.534	17.7825	26.4867	20.4777	34.6461	27.8015	29.3647	26.8849	-1.09224	0.633787	0.885376	Protein FAR1-RELATED SEQUENCE .1
Solyc01g103190	48.7369	69.4058	48.6377	42.1181	69.7991	63.4508	33.5969	54.9968	51.3067	53.4848	1.04245	0.81441	0.94978	COX assembly mitochondrial protein (AHRD V3.3 *** A0A2G3BUT7_CAPCH)
Solyc01g103210	75.2875	59.5834	58.4624	76.137	76.48	59.93	62.5596	64.3415	66.8467	65.5382	-1.01997	0.870673	0.96386	#N/A
Solyc01g103230	296.542	211.557	188.696	203.664	222.392	242.902	269.064	240.513	221.589	243.157	1.09733	0.420522	0.786744	Non-lysosomal glucosylceramidase (AHRD V3.3 *** A0A2G3BUU5_CAPCH)
Solyc01g103250	73.6186	30.8252	44.7181	77.6318	70.7984	141.715	67.7151	67.7919	52.979	82.3808	1.55497	0.305007	0.713905	Zinc finger CCCH domain-containing protein (AHRD V3.3 *-* A0A2K3NPU7_TRIPR)
Solyc01g103320	64.269	64.921	70.5588	62.0258	50.4937	64.8656	101.206	73.5488	65.3699	70.2682	1.07493	0.642994	0.889808	SWIB domain-containing protein/GYF domain-containing protein/Plus-3 domain-containing protein (AHRD V3.11 *-* tr|A0A1Q3C9X0|A0A1Q3C9X0_CEPFO)
Solyc01g103340	7.38974	6.39597	5.56045	24.3774	5.06027	4.06742	8.48127	7.02896	8.9466	5.9185	-1.51163	0.183377	0.59698	Zinc finger CCCH domain-containing protein (AHRD V3.3 *-* A0A2K3NPU7_TRIPR)
Solyc01g103370	57.3477	84.9867	72.3011	42.9292	47.7116	62.2216	45.2087	45.0057	62.365	49.5751	-1.25799	0.206972	0.619762	small GTP-binding protein B
Solyc01g103400	18.6513	26.0607	22.0332	11.7396	25.3601	26.0982	19.4404	20.7882	18.8303	22.7416	1.20771	0.325884	0.727512	#N/A
Solyc01g103410	18.9487	16.491	20.5401	17.1202	13.0898	15.1683	19.358	22.7203	18.2068	17.1904	-1.05913	0.703944	0.912962	KH domain-containing protein (AHRD V3.3 *** A0A2G2W8I6_CAPBA)
Solyc01g103430	183.673	194.925	118.847	115.644	110.262	184.51	131.495	165.086	148.938	144.966	-1.0274	0.863443	0.961639	Shaggy-related protein kinase kappa (AHRD V3.3 *** A0A2G3BUT0_CAPCH)
Solyc01g103460	108.1	166.907	143.159	148.511	179.916	221.077	99.5505	118.616	139.949	147.214	1.05192	0.774409	0.937265	Werner Syndrome-like exonuclease (AHRD V3.3 *** A0A2I4H4A1_9ROSI)
Solyc01g103480	278.819	283.399	325.989	208.524	241.29	241.486	212.121	268.196	270.72	239.948	-1.12824	0.240987	0.659025	Coatomer subunit delta (AHRD V3.3 *** A0A2G2W8M4_CAPBA)
Solyc01g103490	112.935	137.684	104.879	139.715	115.796	143.944	146.772	109.977	122.86	128.073	1.04243	0.672884	0.903087	MACPF domain-containing protein (AHRD V3.3 *** A0A1Q3B5D7_CEPFO)
Solyc01g103500	70.9001	44.443	62.408	81.6021	63.9651	44.5084	68.74	56.1801	63.2919	57.583	-1.09914	0.591119	0.873435	#N/A
Solyc01g103540	1022.34	1037.55	1015.1	1245.79	961.975	919.285	1366.51	1243.88	1076.19	1107.26	1.02887	0.762623	0.934235	Evolutionarily conserved C-terminal region 2 (AHRD V3.3 *-* F4JDC2_ARATH)
Solyc01g103560	35.5231	53.2284	31.7639	51.2691	29.8678	25.6168	19.9117	34.0777	41.89	26.8427	-1.56057	0.0168146	0.234386	tRNA pseudouridine synthase (AHRD V3.3 *** A0A2G3BUS0_CAPCH)
Solyc01g103570	13.5812	16.5897	24.4109	9.12582	19.559	21.8338	12.7893	14.6116	14.9678	16.8076	1.12291	0.711932	0.915603	DNA-binding bromodomain-containing protein (AHRD V3.3 *** F4I9P8_ARATH)
Solyc01g103580	17.1663	8.32406	8.32352	8.09597	11.9993	7.8628	31.9431	8.62477	9.90597	12.6974	1.28179	0.433416	0.79374	DUF679 domain-containing protein (AHRD V3.3 *** A0A1Q3DCM8_CEPFO)
Solyc01g103590	68.8818	57.5885	79.3261	48.5759	27.5409	42.88	54.5059	49.9659	62.5272	42.3485	-1.47649	0.0596731	0.387909	Lactoylglutathione lyase / glyoxalase (AHRD V3.3 *** A0A1Y1HY85_KLENI)
Solyc01g103600	4.2861	4.45196	3.31128	3.3747	18.5212	14.1658	5.46445	5.48042	3.8213	9.41494	2.46381	0.00835785	0.175515	#N/A
Solyc01g103610	21.3536	26.905	21.2432	24.5465	91.6627	111.567	20.3458	45.9176	23.3953	55.5963	2.37639	0.0144391	0.222356	#N/A
Solyc01g103620	38.9937	39.1012	29.8694	21.2271	32.5657	34.4212	12.4793	14.7743	31.3564	21.3217	-1.47063	0.157936	0.567031	Bile acid:sodium symporter (AHRD V3.3 *** A0A200PTK0_9MAGN)
Solyc01g103650	294.116	412.637	284.608	398.92	562.875	608.015	112.738	294.656	342.614	326.533	-1.04925	0.895443	0.969462	Alpha/beta-Hydrolases superfamily protein (AHRD V3.3 *** Q9XID7_ARATH)
Solyc01g103660	74.4177	97.9317	79.3836	78.6633	131.774	151.707	45.7242	74.0963	82.1345	90.7181	1.10451	0.703259	0.912475	Alpha/beta-Hydrolases superfamily protein (AHRD V3.3 *** Q9XID7_ARATH)
Solyc01g103670	40.6684	64.8659	63.0726	42.8699	36.8613	54.4951	49.3147	42.238	51.6793	45.2275	-1.14265	0.374612	0.759924	Alpha/beta-Hydrolases superfamily protein (AHRD V3.3 *** Q9XID7_ARATH)
Solyc01g103690	94.8325	79.6722	71.5123	92.399	75.9565	98.4073	143.101	102.9	84.0578	102.427	1.21852	0.156832	0.564866	RNA helicase family protein (AHRD V3.11 *** tr|A0A2U1QG01|A0A2U1QG01_ARTAN)
Solyc01g103710	35.8598	50.4044	50.1922	36.9191	49.2872	61.7722	36.4248	56.8506	42.78	50.1089	1.17132	0.31378	0.720135	NifU-like protein 2, chloroplastic (AHRD V3.3 *** A0A1U8DVJ9_CAPAN)
Solyc01g103720	41.0501	47.5863	42.5929	12.5939	22.021	61.9501	87.2184	21.7336	31.9944	40.1009	1.25338	0.553473	0.855764	Ribosome biogenesis protein BO.1
Solyc01g103730	188.458	129.462	89.7136	107.701	59.3077	83.9804	173.989	165.612	123.911	109.452	-1.1321	0.603502	0.877362	#N/A
Solyc01g103740	153.43	127.826	135.313	143.009	105.131	109.928	152.655	92.2642	139.575	112.952	-1.2357	0.0928944	0.462619	#N/A
Solyc01g103800	495.517	455.349	470.863	319.06	379.017	352.039	446.743	533.291	429.084	422.248	-1.01619	0.88672	0.96736	40S ribosomal protein S12 (AHRD V3.3 *** A0A1U8DVK6_CAPAN)
Solyc01g103850	16.918	17.2467	33.2004	23.0249	26.8357	26.7652	18.4664	30.5543	21.732	25.231	1.16101	0.466337	0.812287	ubiquitin-like domain-containing CTD phosphatase (AHRD V3.11 *** tr|A0A2I4GDP0|A0A2I4GDP0_9ROSI)
Solyc01g103870	9.43235	3.69082	2.88806	12.3353	4.12508	26.1843	9.4585	13.0187	5.93437	10.739	1.80963	0.195092	0.607582	AGAMOUS-like 98 (AHRD V3.3 *-* Q9FIW6_ARATH)
Solyc01g103880	30.7939	50.806	53.5491	20.3548	25.4733	65.5048	34.444	34.5114	36.1368	37.5283	1.03851	0.880659	0.964966	#N/A
Solyc01g103900	9.92803	4.06465	8.74424	14.1062	20.7374	6.90073	9.1183	8.16852	8.39952	10.1608	1.20968	0.555806	0.856977	Phospholipase D (AHRD V3.11 *-* tr|M0ZZP4|M0ZZP4_SOLTU)
Solyc01g103950	39.1724	25.5216	24.5262	44.2245	24.7504	44.0086	35.3057	44.5521	32.2697	36.1791	1.12115	0.512655	0.833209	Bifunctional hydroxymethylpyrimidine kinase/phosphomethylpyrimidine kinase (AHRD V3.3 *** A0A2Z4MGS9_BREBE)
Solyc01g103960	16.0463	16.1168	23.855	17.7795	21.0435	17.3576	8.57097	13.765	18.1986	14.408	-1.26309	0.363434	0.752697	RNA helicase DEAH-box15
Solyc01g103970	117.048	85.573	94.5108	143.31	130.18	60.7205	109.227	253.778	107.923	121.665	1.12733	0.653089	0.895427	E3 ubiquitin-protein ligase RNF170-like protein (DUF 1232) (AHRD V3.3 *** Q0WWX8_ARATH)
Solyc01g103980	540.634	377.563	454.441	377.059	396.809	359.661	615.284	691.356	432.459	496.379	1.14781	0.353307	0.746839	E3 ubiquitin-protein ligase RNF170-like protein (DUF 1232) (AHRD V3.3 *** Q93WJ5_ARATH)
Solyc01g104000	96.9915	114.307	59.0026	87.8806	83.7735	82.9829	104.113	119.64	87.0748	96.4648	1.10784	0.498106	0.826675	Serine hydroxymethyltransferase (AHRD V3.3 *** A0A1U8DVN3_CAPAN)
Solyc01g104030	342.322	416.365	317.077	423.776	439.348	431.969	463.465	450.959	372.008	446.277	1.19964	0.0695313	0.414213	Potassium channel AKT2 (AHRD V3.3 *** A0A1U8E6Z3_CAPAN)
Solyc01g104040	113.679	122.958	114.779	112.598	111.105	133.899	72.909	97.7533	115.933	101.474	-1.14249	0.326961	0.727902	UDP-glucose:glycoprotein glucosyltransferase (AHRD V3.3 *** A0A2I4FV41_9ROSI)
Solyc01g104060	51.1919	40.7658	52.7757	27.2562	84.2889	43.8798	63.4927	54.9909	41.6245	59.9463	1.44017	0.100138	0.473284	Aminomethyltransferase (AHRD V3.3 *** A0A1J3IXX0_NOCCA)
Solyc01g104070	46.2238	36.7623	33.3865	20.6828	19.8539	17.5615	68.0007	33.3738	32.9126	29.8251	-1.10352	0.720201	0.9175	ARM repeat superfamily protein (AHRD V3.3 *** A0A2U1NNQ7_ARTAN)
Solyc01g104170	168.275	168.097	124.528	129.996	144.008	108.183	173.729	142.391	146.283	140.112	-1.04405	0.720896	0.917821	Ankyrin repeat domain-containing protein 2 (AHRD V3.3 *** A0A2G2XWN6_CAPAN)
Solyc01g104220	23.3575	8.69376	17.317	13.7963	12.4106	14.8209	15.2973	16.1614	14.8411	14.6029	-1.01631	0.935356	0.982909	Transmembrane emp24 domain-containing protein p24delta3 (AHRD V3.3 *** A0A2G3AUH9_CAPCH)
Solyc01g104240	76.6049	64.1458	72.7512	72.668	53.2565	60.2629	56.0809	80.2166	71.3924	61.6418	-1.15818	0.367994	0.756091	Hydroxyproline-rich glycoprotein-like (AHRD V3.3 *-* Q5JLQ2_ORYSJ)
Solyc01g104250	77.0906	61.8187	23.5911	74.039	63.9368	82.6396	25.5099	65.3069	53.7134	54.4693	1.01407	0.961561	0.988766	Rhomboid-like protein (AHRD V3.11 *** tr|A0A2I0WGB8|A0A2I0WGB8_9ASPA)
Solyc01g104280	66.8818	55.4159	75.9029	61.3008	78.007	57.0519	59.6454	51.7764	64.4416	60.8875	-1.05837	0.680116	0.904064	elongation of fatty acids protein 3-like (AHRD V3.3 *** A0A2I4FV17_9ROSI)
Solyc01g104300	38.0181	31.2451	29.3102	49.2701	69.0497	39.8852	22.3133	40.3977	36.1904	39.6939	1.09681	0.68922	0.908514	DUF639 domain-containing protein (AHRD V3.3 *** A0A1Q3AZD2_CEPFO)
Solyc01g104310	34.6782	25.986	36.0865	46.1849	35.061	38.7451	53.37	40.7192	35.0074	41.4509	1.18406	0.242265	0.660402	Patatin (AHRD V3.3 *** A0A2G2W8F3_CAPBA)
Solyc01g104340	10.0785	11.4854	10.5754	9.04227	10.2335	26.0501	8.67298	13.9935	10.2572	13.4116	1.30753	0.226929	0.643574	green ripe
Solyc01g104370	77.1303	75.3374	66.1232	39.6187	27.9689	54.4432	67.8516	63.2583	62.4629	50.562	-1.23537	0.309252	0.717274	60S acidic ribosomal protein .1
Solyc01g104410	47.3832	43.8412	35.8389	11.3063	42.0317	63.1888	34.7285	18.3277	30.2897	36.0581	1.19044	0.581801	0.870409	Sterol 3-beta-glucosyltransferase (AHRD V3.3 *** A0A1J3HV40_NOCCA)
Solyc01g104430	51.784	41.3775	63.8337	49.2084	65.6818	47.4249	41.4958	46.3691	50.9345	49.479	-1.02942	0.826748	0.953357	Nucleoporin autopeptidase (AHRD V3.3 --* AT1G59660.3)
Solyc01g104450	20.6647	37.8989	11.0798	57.2152	10.5432	9.43235	7.55691	22.7647	26.5445	11.4367	-2.321	0.0248772	0.278867	#N/A
Solyc01g104460	11.213	22.2022	20.6719	19.0394	14.2491	37.4043	19.0749	16.39	17.6925	20.204	1.14196	0.577274	0.867995	partner of Y14-MAGO Chr1:3838777-3839978 FORWARD LENGTH=204 201606 (AHRD V3.11 *** AT1G11400.6)
Solyc01g104470	374.548	373.254	385.552	360.952	448.788	399.072	518.391	631.261	373.475	492.028	1.31743	0.00931458	0.183639	Ribosome assembly factor mrt4 (AHRD V3.3 *** A0A328DGN8_9ASTE)
Solyc01g104480	23.3325	56.1838	55.0361	10.5767	37.3277	40.6828	33.7762	53.7109	29.5558	40.7407	1.37844	0.317571	0.722463	C-jun-amino-terminal kinase-interacting protein (AHRD V3.3 *-* AT1G36990.1)
Solyc01g104490	6.68773	18.9143	8.62868	7.06654	18.3889	17.975	5.77453	10.9599	9.37142	12.0264	1.28331	0.427105	0.790837	Separase (AHRD V3.3 *** A0A1J3GIR9_NOCCA)
Solyc01g104500	30.8808	16.3513	36.5763	19.6263	26.9604	22.5934	32.5516	23.7769	24.5369	26.2035	1.06792	0.754519	0.932265	DUF1644 domain-containing protein (AHRD V3.3 *-* A0A1Q3BHE3_CEPFO)
Solyc01g104520	15.3313	13.0876	14.4623	16.1202	12.5609	18.4196	14.8181	11.4123	14.7066	14.0642	-1.04567	0.780018	0.938569	Kinetochore protein Ndc80 (AHRD V3.3 *-* A0A2U1PCC6_ARTAN)
Solyc01g104530	48.6879	65.0747	42.2358	66.5375	58.4939	64.3871	55.3054	78.0261	54.6254	63.4935	1.16234	0.280937	0.695798	MAP kinase kinase kinase 10
Solyc01g104560	81.7982	59.5681	85.6314	50.7828	52.2929	54.1847	97.6686	99.9727	67.8464	72.5252	1.06896	0.725665	0.918845	protein-protein interaction regulator family protein (AHRD V3.3 *** AT1G15200.1)
Solyc01g104600	185.515	266.551	162.282	140.089	224.616	218.824	226.063	277.237	183.108	235.588	1.2866	0.0673181	0.408159	COP9 signalosome complex subunit 8 (AHRD V3.3 *** A0A2I4GE15_9ROSI)
Solyc01g104620	21.927	8.56258	14.3418	8.67528	12.3777	14.5074	17.982	12.27	12.3628	14.1084	1.1412	0.558163	0.857785	#N/A
Solyc01g104640	21.5291	49.9556	37.8989	43.8779	68.5429	55.4862	59.8284	44.5074	36.5696	56.412	1.54259	0.100897	0.473462	P-loop containing nucleoside triphosphate hydrolases superfamily protein (AHRD V3.11 *** tr|A0A1P8B6E0|A0A1P8B6E0_ARATH)
Solyc01g104660	153.768	148.261	115.56	135	129.57	102.417	178.596	163.121	137.328	140.222	1.02107	0.866352	0.962736	Plant/F1M20-13 protein (AHRD V3.3 *** A0A072UZK1_MEDTR)
Solyc01g104680	320.706	278.491	347.073	325.14	195.561	187.986	269.137	263.053	316.849	225.869	-1.4028	0.00530823	0.144516	Ran protein/TC4 protein ran2a
Solyc01g104700	258.158	269.879	228.102	252.056	185.796	138.563	177.953	197.337	251.577	173.4	-1.45084	0.000841438	0.0649926	Ran protein/TC4 protein ran2b
Solyc01g104740	14.6711	15.5941	16.8089	69.6881	13.0113	21.1009	13.2811	51.1764	22.7526	20.7841	-1.09471	0.813516	0.949692	Multiprotein-bridging factor 1c (AHRD V3.3 *** A0A1U8F6N4_CAPAN)
Solyc01g104750	19.2973	25.7872	14.5203	34.7462	23.4951	16.8481	14.4992	22.7647	22.3844	19.0123	-1.17737	0.534619	0.845157	WAT1-related protein (AHRD V3.3 *** K4B247_SOLLC)
Solyc01g104760	15.6114	18.6019	21.0964	26.1498	33.7628	41.348	35.2148	33.5163	20.0064	35.8277	1.79081	0.000633866	0.0549854	Sequence-specific DNA binding transcription factor (AHRD V3.3 *** A0A2K3PC30_TRIPR)
Solyc01g104770	89.5901	73.7662	81.9022	81.9651	68.6318	73.1313	130.433	104.494	81.6132	90.9446	1.11434	0.54258	0.850123	Actin-related protein (AHRD V3.3 *** A0A200RCC6_9MAGN)
Solyc01g104790	18.1378	19.1698	9.9648	10.802	22.0259	14.4572	14.2302	13.2122	13.9089	15.6423	1.12462	0.531683	0.843626	#N/A
Solyc01g104860	16.4237	18.8826	16.297	17.5643	10.9348	13.2827	10.7274	12.8453	17.2611	11.8942	-1.45122	0.00743513	0.167395	Peroxidase (AHRD V3.11 *** tr|K4B258|K4B258_SOLLC)
Solyc01g104880	65.4462	77.5336	64.6971	47.5494	51.4196	63.6501	78.8297	64.497	62.8566	63.8689	1.0161	0.908316	0.973887	Phosphatidylserine decarboxylase proenzyme 2 (AHRD V3.3 *** A0A2G3AWK6_CAPCH)
Solyc01g104920	26.8458	26.7839	19.1235	19.0064	20.0743	29.3095	26.0613	22.7714	22.6102	24.3085	1.07511	0.65739	0.896913	Vesicle-fusing ATPase (AHRD V3.3 *** A0A2G3C862_CAPCH)
Solyc01g104930	11.6459	14.596	9.19605	10.7618	33.8359	40.0767	8.76293	24.9884	11.3887	23.3434	2.0497	0.0256924	0.278903	#N/A
Solyc01g104950	533.277	560.389	475.635	493.854	448.694	401.751	519.687	570.908	514.729	480.899	-1.07035	0.485829	0.822256	Beta-D-xylosidase 4 (AHRD V3.11 *** tr|A0A2G2Y364|A0A2G2Y364_CAPAN)
Solyc01g104970	96.7636	99.2303	115.301	112.633	73.2151	92.8818	122.632	103.487	105.673	96.3841	-1.09637	0.505206	0.830595	Receptor-like kinase (AHRD V3.3 *** A0A0K9PIY0_ZOSMR)
Solyc01g104980	101.496	97.0735	80.619	105.25	72.7171	81.0737	128.422	98.4336	95.6208	92.9126	-1.02915	0.82029	0.951395	F-box/kelch-repeat protein (AHRD V3.3 *** A0A1U8E5W2_CAPAN)
Solyc01g105020	40.0213	36.6646	56.5192	48.0174	30.907	50.5153	52.8802	66.2777	44.6718	48.3654	1.08268	0.659793	0.897319	Protein phosphatase 2C (PP2C)-like domain (AHRD V3.3 *-* A0A200PXZ2_9MAGN)
Solyc01g105060	399.262	504.032	498.818	329.764	477.201	580.5	288.161	475.107	426.546	441.299	1.03459	0.81096	0.948609	3-hydroxyacyl-[acyl-carrier-protein] dehydratase FabZ (AHRD V3.3 *** A0A2G2X231_CAPBA)
Solyc01g105070	5.53369	7.29208	7.612	6.19056	7.3992	8.92308	21.8603	6.30982	6.6035	9.76885	1.47935	0.11835	0.509724	LECEVI16G peroxidase precursor
Solyc01g105090	34.164	25.9305	51.0004	85.1781	37.6425	48.2698	56.2442	69.1056	44.2915	51.5509	1.1639	0.568979	0.862417	RNA-binding CR.1
Solyc01g105110	14.3595	1032.53	582.422	146.264	23.3895	31.1267	121.89	86.4153	188.519	52.6234	-3.58241	0.0998593	0.473284	cytoplasmic tRNA 2-thiolation protein (AHRD V3.3 *-* AT3G55570.1)
Solyc01g105120	147.552	156.84	83.4327	119.375	138.301	153.107	207.084	108.714	123.215	147.762	1.19922	0.251239	0.670267	protein LN.1
Solyc01g105140	89.1262	136.562	91.9425	43.2425	174.296	272.766	61.1651	189.376	83.4048	153.189	1.83669	0.0556474	0.376898	Arginine/serine-rich splicing factor, putative, expressed (AHRD V3.3 *-* Q6AVF4_ORYSJ)
Solyc01g105160	32.8221	24.4219	19.7933	23.6004	21.0371	28.0862	38.7154	33.7042	24.737	29.632	1.19789	0.35655	0.749266	Copper-transporting ATPase PAA1, chloroplastic (AHRD V3.3 *** A0A2G2X1Z0_CAPBA)
Solyc01g105170	54.8721	54.5054	46.09	59.9067	46.4856	38.7114	70.3338	44.3799	53.6066	48.683	-1.10114	0.478846	0.817753	#N/A
Solyc01g105180	4.68275	13.1526	6.42417	7.74756	5.1456	14.9531	4.49399	15.5393	7.44087	8.56165	1.15062	0.665252	0.900354	Protein D.1
Solyc01g105290	23.6135	31.638	30.6767	15.8415	31.6849	42.3179	26.0069	34.2106	24.5467	33.0488	1.34637	0.114488	0.502437	BTB/POZ domain protein (AHRD V3.3 *** AT3G19920.2)
Solyc01g105300	13.3255	24.4652	4.40148	7.12113	9.38182	3.90535	61.8999	63.8313	10.0541	19.506	1.94009	0.294968	0.703898	Metacaspase.1
Solyc01g105330	6.38775	13.6533	11.0128	7.36556	4.42266	5.8699	5.70894	6.20705	9.17112	5.5073	-1.66527	0.0822616	0.440068	Methyl-CpG binding domain protein (AHRD V3.3 *-* A0A2K3LPB7_TRIPR)
Solyc01g105370	19.3622	32.287	21.9402	17.461	23.5104	33.3061	13.534	22.7773	22.1219	22.1655	1.00197	0.992487	0.99698	2-nitropropane dioxygenase-like protein (AHRD V3.3 *** Q9FMG0_ARATH)
Solyc01g105410	48.7599	42.3482	49.3221	53.7988	44.653	31.6807	68.5735	33.0638	48.3814	42.3193	-1.14325	0.440012	0.796984	Protein EXORDIUM-like 2 (AHRD V3.3 *** B1Q489_CAPCH)
Solyc01g105440	13.102	12.037	17.4393	12.9035	9.95494	14.8466	11.8546	14	13.7253	12.5147	-1.09674	0.509063	0.831435	Unknown protein
Solyc01g105450	93.465	144.954	106.973	105.543	130.646	176.449	73.6127	130.719	111.211	122.04	1.09738	0.570793	0.863772	ABC transporter G family member .1
Solyc01g105460	40.3773	23.3575	31.4329	55.9141	21.8625	49.136	34.6174	43.7978	35.8812	35.7241	-1.0044	0.984087	0.995557	1,4-dihydroxy-2-naphthoate polyprenyltransferase, chloroplastic (AHRD V3.3 *** A0A2G2Y2Y1_CAPAN)
Solyc01g105470	30.0942	23.6537	34.8934	11.4826	42.8703	27.8434	37.9234	14.4373	23.1095	28.4327	1.23035	0.509872	0.831505	#N/A
Solyc01g105480	15.5605	40.724	18.6345	19.5636	69.7151	41.5574	44.6361	4.90684	21.9235	28.2238	1.28738	0.645096	0.890561	#N/A
Solyc01g105490	21.6238	23.0999	31.0246	17.696	20.9928	25.7651	18.2345	22.7392	22.8839	21.7617	-1.05157	0.773623	0.936972	#N/A
Solyc01g105500	77.9168	76.2984	74.0693	99.1199	146.048	114.882	80.8582	135.581	81.2805	116.458	1.43279	0.0368072	0.323436	1,4-beta-xylanase (AHRD V3.3 *** B6THX1_MAIZE)
Solyc01g105510	29.2312	23.5633	33.2562	31.9206	19.6031	17.9637	13.2592	48.5888	29.242	21.8245	-1.33987	0.247737	0.666444	LMBR1-like membrane protein (AHRD V3.3 *** A0A200RDV5_9MAGN)
Solyc01g105520	7.93843	21.8518	11.0163	4.96953	16.6213	19.607	18.9531	9.89073	9.87172	15.7216	1.59259	0.126093	0.520672	DNA helicase (AHRD V3.3 *** A0A2U1PZH1_ARTAN)
Solyc01g105560	122.833	175.056	147.244	155.479	178.176	239.238	68.596	115.98	148.953	135.703	-1.09764	0.728988	0.919937	GTP cyclohydrolase II/3,4-dihydroxy-2-butanone 4-phosphate synthase
Solyc01g105600	17.279	4.18374	3.74116	3.74623	5.48341	4.75613	26.2449	3.60624	5.64184	7.04857	1.24934	0.638568	0.887081	hypothetical protein (AHRD V3.3 *-* AT2G14095.1)
Solyc01g105670	89.9043	107.385	89.0953	91.8818	82.4651	77.8455	124.214	97.1859	94.2871	93.8252	-1.00492	0.969825	0.991099	Serine/threonine-protein kinase PEPKR2 (AHRD V3.3 *** A0A2G2Y344_CAPAN)
Solyc01g105690	43.6189	51.1273	61.1277	42.5203	72.4938	109.369	52.3189	47.275	49.0671	66.5459	1.35622	0.156435	0.564698	transcription factor bHLH143-like (AHRD V3.11 *** tr|A0A2I4HEY9|A0A2I4HEY9_9ROSI)
Solyc01g105700	132.311	146.048	96.8818	124.515	145.132	183.715	68.2653	89.5936	123.563	113.005	-1.09343	0.627255	0.884076	Myc-type, basic helix-loop-helix (BHLH) domain-containing protein (AHRD V3.3 *-* A0A2U1NNA1_ARTAN)
Solyc01g105710	127.195	155.089	138.09	155.047	107.38	118.478	100.132	94.5936	143.357	104.773	-1.36826	0.0020047	0.0987207	FK506 binding protein 12
Solyc01g105800	15.1399	21.7457	26.4263	29.9047	20.0028	13.546	18.9508	21.0418	22.5849	18.1302	-1.2457	0.299326	0.709185	MADS-box protein JOINTLESS (AHRD V3.3 *** A0A2G3AWN8_CAPCH)
Solyc01g105820	5.40234	12.3911	8.72481	10.5066	13.0231	6.60349	5.77257	19.1085	8.8507	9.86895	1.11505	0.753023	0.931537	Unknown protein
Solyc01g105980	149.465	173.715	286.048	226.048	153.965	243.215	170.423	229.673	202.421	195.665	-1.03453	0.828552	0.954119	vacuole protein (AHRD V3.3 *** AT4G33625.1)
Solyc01g106010	16.2388	23.7861	14.4813	13.739	15.4363	18.8698	18.8811	23.1364	16.6498	18.8868	1.13435	0.482609	0.8205	Fructose-1,6-bisphosphatase (AHRD V3.3 *** B6SRX9_MAIZE)
Solyc01g106020	19.8463	15.0841	12.9793	6.83246	15.7974	19.5226	21.5554	15.5069	12.7646	17.9185	1.40377	0.185676	0.599242	KH domain-containing protein (AHRD V3.3 *** A0A2I0WKQ9_9ASPA)
Solyc01g106040	7.89352	12.449	5.94137	6.78809	5.86569	16.5882	7.15882	20.0682	7.93432	10.8734	1.37043	0.286411	0.699723	GATA transcription factor 24 (AHRD V3.3 *** A0A2G3AWR4_CAPCH)
Solyc01g106050	11.3369	7.86701	12.1232	9.46964	20.3352	6.7306	8.11308	11.7475	10.0592	10.6871	1.06242	0.782389	0.939116	Dynamin-related protein 3B (AHRD V3.3 *** A0A2G2Y3C9_CAPAN)
Solyc01g106070	26.0557	46.3705	39.5246	11.8277	92.646	147.008	5.59695	47.1885	27.4144	43.5501	1.58859	0.486083	0.822391	Putative endonuclease or glycosyl hydrolase (AHRD V3.3 --* AT5G61180.1)
Solyc01g106080	133.575	86.9407	113.595	82.1946	126.314	84.3885	173.673	116.744	102.044	121.248	1.1882	0.299578	0.709209	Methylmalonate-semialdehyde dehydrogenase (AHRD V3.3 *** A0A200PUD7_9MAGN)
Solyc01g106120	4.61703	3.78441	5.12841	10.6131	8.83241	11.003	3.898	17.9012	5.55324	9.07462	1.63411	0.181072	0.594453	#N/A
Solyc01g106150	92.959	114.318	79.0757	141.215	253.457	293.59	92.7985	84.8714	104.372	155.592	1.49075	0.136633	0.537056	Interferon-related developmental regulator (AHRD V3.3 *** A0A200QG19_9MAGN)
Solyc01g106190	14.435	23.1403	16.1109	20.1875	21.2399	6.39648	20.9456	25.1236	18.155	16.3518	-1.11027	0.709359	0.915205	heat shock protein (AHRD V3.3 *** AT5G09580.1)
Solyc01g106200	7.0113	8.12305	11.9478	15.0286	5.43531	13.4474	4.42209	7.56267	10.0561	7.03139	-1.43018	0.161939	0.571855	Oligopeptide transporter (AHRD V3.3 *-* A0A200QXQ7_9MAGN)
Solyc01g106210	163.861	135.172	158.452	106.515	76.6318	74.1318	135.377	125.992	139.049	99.2147	-1.4015	0.0453616	0.347752	Heat shock protein 70 kDa (AHRD V3.3 *** A0A2K3MZA1_TRIPR)
Solyc01g106280	1106.62	938.222	738.632	943.757	815.701	790.965	1084.63	910.095	922.354	893.335	-1.03248	0.729932	0.919937	PSTVd RNA-biding protein
Solyc01g106340	16.6445	17.6502	19.6499	18.3224	8.5102	9.95255	12.7395	11.7001	18.0339	10.6	-1.70132	0.00569672	0.146402	Glutamyl-tRNA(Gln) amidotransferase subunit A (AHRD V3.3 *** A0A2U1LC75_ARTAN)
Solyc01g106370	20.5063	28.6129	29.4273	42.128	29.1139	29.9562	19.7796	29.0115	29.204	26.5977	-1.09799	0.58805	0.872474	Protein trichome birefringence-like 12 (AHRD V3.3 *** A0A2G2W8Y8_CAPBA)
Solyc01g106400	9.74697	10.5665	8.7298	8.06661	10.1705	8.62555	10.7274	7.30328	9.22835	9.10512	-1.01353	0.932318	0.98172	Peptide-methionine (R)-S-oxide reductase (AHRD V3.3 *** A0A2G2W8Z3_CAPBA)
Solyc01g106420	76.3193	123.977	90.7314	115.391	162.208	105.69	116.757	135.643	99.7645	128.365	1.28668	0.0679062	0.409057	Major facilitator superfamily protein (AHRD V3.3 *** A0A2U1NYT6_ARTAN)
Solyc01g106440	16.624	24.1882	24.6022	46.3478	17.7985	16.8943	29.3644	26.989	26.0217	22.0944	-1.17775	0.484637	0.821497	S-acyltransferase (AHRD V3.3 *** A0A2G2W8Y7_CAPBA)
Solyc01g106450	179.413	185.557	128.019	129.513	132.914	173.364	167.828	187.396	153.278	164.074	1.07043	0.582697	0.870409	L-galactose dehydrogenase (AHRD V3.3 *** A0A2G3BV20_CAPCH)
Solyc01g106470	280.053	284.042	310.33	408.361	166.356	189.987	177.761	160.928	316.864	173.404	-1.82732	1.32819e-05	0.00576077	Tunicamycin induced protein (AHRD V3.3 *** Q84JN2_ARATH)
Solyc01g106480	21.6742	24.0758	13.9552	28.6746	14.6965	28.2024	34.6736	19.4182	21.3766	22.9841	1.0752	0.753678	0.932035	glyoxisomal malate dehydrogenase
Solyc01g106500	40.3074	16.3807	59.5485	39.5609	40.1124	49.096	23.5119	46.352	35.3153	38.2754	1.08382	0.75765	0.932957	Receptor-like protein kinase (AHRD V3.3 *** A0A2R6Q659_ACTCH)
Solyc01g106540	99.9483	96.7669	55.76	87.2177	45.8299	45.6969	99.6705	61.3061	82.8147	59.8104	-1.38462	0.0892922	0.453965	neurofilament heavy protein Chr4:9567046-9569913 REVERSE LENGTH=661 201606 (AHRD V3.11 *-* AT4G17000.3)
Solyc01g106560	56.7311	69.7151	51.8992	50.1428	69.3751	77.495	34.0795	46.584	56.6408	54.0508	-1.04792	0.781887	0.938814	#N/A
Solyc01g106570	47.5709	47.6776	31.2007	21.5761	16.2754	21.3091	44.6253	33.5851	35.1518	26.8507	-1.30916	0.321464	0.724879	DUF.1
Solyc01g106590	18.7844	18.6473	34.2462	25.7395	20.6607	18.5846	18.6436	24.4311	23.5725	20.45	-1.15269	0.40423	0.777728	Protein trichome birefringence-like 13 (AHRD V3.3 *** A0A1U8E7U9_CAPAN)
Solyc01g106690	207.393	215.23	138.189	196.543	154.754	110.076	145.84	114.546	186.598	129.882	-1.43668	0.0386895	0.328125	DUF1005 domain-containing protein (AHRD V3.3 *** A0A1Q3BZI1_CEPFO)
Solyc01g106700	12.3611	29.9642	12.9167	9.32281	12.2526	26.4674	5.17841	6.93475	14.5325	10.3882	-1.39894	0.398334	0.775559	MADS-box transcription factor 23 (AHRD V3.3 *** A0A2G2Y5S9_CAPAN)
Solyc01g106740	72.541	71.5241	45.3341	38.473	40.2623	74.5484	23.5871	28.8646	54.8472	37.8089	-1.45064	0.144495	0.548867	Aspartate--tRNA(Asp/Asn) ligase (AHRD V3.11 *** tr|A0A2G3BV66|A0A2G3BV66_CAPCH)
Solyc01g106750	26.305	29.9714	48.1824	14.6553	25.7168	31.0597	4.08388	31.3373	27.3154	17.8808	-1.52764	0.34138	0.739951	Serine/threonine-protein kinase TOR (AHRD V3.3 *-* A0A2G2V7H7_CAPBA)
Solyc01g106780	68.2151	48.0782	14.8185	29.0226	42.1381	26.2401	57.0632	45.9439	34.4622	41.2625	1.19733	0.518397	0.835854	Pyruvate kinase (AHRD V3.3 *** A0A2G3AVH0_CAPCH)
Solyc01g106790	29.2285	34.2062	25.8269	21.0068	34.8781	41.8819	23.5348	24.7091	27.1385	30.3589	1.11867	0.507453	0.831435	Tubulin alpha-6 chain, putative (AHRD V3.3 *** Q8LED1_ARATH)
Solyc01g106800	8.96968	12.8303	15.9219	12.716	12.529	15.4392	14.1946	10.6312	12.3549	13.0711	1.05797	0.714145	0.916219	amino acid transporter 1
Solyc01g106810	15.3799	11.1255	7.61656	10.7159	12.5915	7.24923	9.26228	16.2584	10.8709	10.8278	-1.00398	0.98457	0.995557	short hypocotyl in white light1 Chr1:26342072-26343082 REVERSE LENGTH=192 201606 (AHRD V3.11 *-* AT1G69935.1)
Solyc01g106820	7.65766	5.66946	8.65702	9.94925	9.26498	8.35255	17.3114	6.60403	7.81986	9.69843	1.24023	0.370341	0.757818	Ethylene-dependent gravitropism-deficient and yellow-green-like 3 (AHRD V3.3 *** A0A2U1KYW2_ARTAN)
Solyc01g106870	18.8659	17.5979	18.1273	16.843	19.2507	43.4921	25.6693	21.9315	17.8432	26.202	1.46846	0.0423704	0.33625	Receptor-like protein 12 (AHRD V3.3 *-* A0A2P4M348_QUESU)
Solyc01g106880	24.1658	22.5818	44.8259	24.2958	44.8387	39.225	25.0319	31.1102	27.7655	34.21	1.2321	0.279203	0.694304	Ribosomal RNA small subunit methyltransferase E (AHRD V3.3 *** A0A1J3G4Z5_NOCCA)
Solyc01g106890	27.9164	22.2188	32.2368	38.0362	24.3793	30.1402	21.8455	30.5204	29.5313	26.4564	-1.11623	0.473585	0.814358	hypothetical protein (AHRD V3.3 *** AT3G19660.1)
Solyc01g106940	12.0516	5.76266	13.4328	9.68802	7.54584	6.89035	13.1095	6.87347	9.7503	8.27328	-1.17853	0.42896	0.791715	Telomere repeat-binding factor 2 (AHRD V3.3 *-* A0A2G3AVM6_CAPCH)
Solyc01g106950	78.5344	80.4735	63.0571	71.2751	102.795	130.684	77.5319	86.9781	73.0039	97.5598	1.33636	0.0524728	0.36843	myosin heavy chain-like protein (AHRD V3.3 *** AT2G14680.3)
Solyc01g106980	11.4052	9.878	14.0206	4.61283	15.8178	13.1607	12.8529	8.29151	9.23904	12.2044	1.32096	0.381745	0.766412	Endo-1,4-beta-xylanase (AHRD V3.11 *** tr|A0A1J3CP06|A0A1J3CP06_NOCCA)
Solyc01g107010	12.4048	14.408	17.9923	8.80945	11.6992	15.9309	30.236	16.1938	12.9735	17.3807	1.33971	0.23847	0.655941	DNA polymerase kappa (AHRD V3.3 *** A0A2G2V759_CAPBA)
Solyc01g107020	12.3288	10.9589	8.27981	10.8783	7.25963	9.83574	9.00014	6.43032	10.5031	8.01772	-1.30999	0.0815566	0.43842	Acyl-CoA N-acyltransferase (AHRD V3.11 *** tr|A0A2U1MJU7|A0A2U1MJU7_ARTAN)
Solyc01g107160	150.102	150.854	144.626	171.535	101.779	134.035	87.0987	92.6478	153.952	102.431	-1.50299	0.0130745	0.213899	Mitotic checkpoint protein BUB3, putative, expressed (AHRD V3.3 *** Q75HB5_ORYSJ)
Solyc01g107180	46.1792	35.7138	24.525	41.0507	37.8297	31.3608	27.8767	36.7878	35.8966	33.2117	-1.08084	0.612558	0.879526	Phototropic-responsive NPH3 family protein (AHRD V3.3 *** A0A2U1N5P4_ARTAN)
Solyc01g107200	28.3613	37.2622	40.7173	18.0705	37.1678	39.8404	19.315	35.0568	29.6952	31.6439	1.06562	0.794536	0.943471	QWRF motif-containing protein 2 (AHRD V3.3 *** A0A2G2Y2D4_CAPAN)
Solyc01g107220	21.0772	18.4019	21.3267	23.4598	34.9841	38.6255	19.6715	35.5771	20.9885	31.1845	1.48579	0.0320713	0.303668	#N/A
Solyc01g107230	25.3553	38.8109	20.0559	3.24789	32.8394	37.399	3.71273	61.8818	15.9117	23.0477	1.44847	0.596271	0.874743	Unknown protein
Solyc01g107240	111.657	187.129	255.508	139.099	282.174	278.098	113.519	182.874	165.078	200.902	1.21701	0.365885	0.754692	Peroxisomal membrane 22 kDa (Mpv17/PMP22) family protein (AHRD V3.3 *-* A0A2U1NNX3_ARTAN)
Solyc01g107260	25.8876	48.5908	35.8264	15.5592	38.9388	39.0551	27.5384	28.6726	28.9374	33.1029	1.14395	0.644737	0.890561	myosin-2 heavy chain-like protein (AHRD V3.3 *** AT1G49870.1)
Solyc01g107270	14.8984	7.2515	3.87355	14.3742	4.14617	8.16598	7.01831	13.6608	8.80674	7.54816	-1.16674	0.690739	0.909026	Phosphoribosylformylglycinamidine synthase (AHRD V3.3 *** A0A2G2Y2D6_CAPAN)
Solyc01g107290	10.3603	11.5786	12.1793	12.2365	10.2476	8.95016	8.09715	7.69253	11.5632	8.69388	-1.33004	0.0577554	0.38299	RING/U-box superfamily protein (AHRD V3.3 *-* A0A2U1QJN2_ARTAN)
Solyc01g107300	75.2151	59.7985	37.4823	46.9671	85.8818	62.0484	88.7984	25.0235	53.0461	58.6606	1.10584	0.691221	0.909026	Protein phosphatase 2C family protein (AHRD V3.11 *** tr|A0A2U1MLG3|A0A2U1MLG3_ARTAN)
Solyc01g107340	181.016	136.534	139.94	167.644	196.43	153.763	130.596	121.452	155.175	147.944	-1.04887	0.711018	0.915435	classical arabinogalactan protein 9 (AHRD V3.11 *-* XP_004230717.1)
Solyc01g107360	18.005	21.5594	74.7984	22.4395	73.2151	30.6995	73.4651	107.965	28.4108	64.9792	2.28713	0.0275685	0.288029	WD40 repeat (AHRD V3.3 *** A0A200PS16_9MAGN)
Solyc01g107370	312.329	288.596	368.514	277.263	157.824	123.159	177.573	100.829	309.786	136.584	-2.2681	0.00103108	0.07149	Gibberellin-regulated protein (AHRD V3.3 *** K0E174_POPTO)
Solyc01g107420	5.13904	8.30786	13.5097	6.51927	18.09	8.28901	11.7132	14.7815	7.83076	12.6936	1.62099	0.0594099	0.387909	TIP41-like family protein (AHRD V3.3 *-* A0A068F539_BRANA)
Solyc01g107430	14.4159	15.1711	10.2279	12.0726	23.1771	9.1246	19.7099	20.2804	12.8192	17.0513	1.33014	0.174122	0.586518	Zinc finger protein (AHRD V3.3 *** A0A200QZQ7_9MAGN)
Solyc01g107450	158.656	120.377	109.226	73.6714	129.524	84.8741	119.562	70.2039	111.341	98.0097	-1.13602	0.509041	0.831435	hypothetical protein (AHRD V3.3 *-* AT4G34265.6)
Solyc01g107470	96.9244	98.3689	75.7992	85.7171	73.3346	99.1481	95.1502	107.465	88.7168	92.8577	1.04668	0.776169	0.937265	LYR motif-containing protein (AHRD V3.11 *** tr|A0A2G3BVG4|A0A2G3BVG4_CAPCH)
Solyc01g107490	24.1374	16.7744	29.1345	17.8161	25.6501	12.583	13.6789	20.8778	21.4111	17.4242	-1.22882	0.358233	0.750126	Basic helix-loop-helix (BHLH) DNA-binding superfamily protein (AHRD V3.3 *-* A0A2U1Q6P2_ARTAN)
Solyc01g107510	135.733	189.776	132.369	161.059	249.889	257.44	158.538	203.308	153.082	213.392	1.39397	0.0168903	0.234521	DNA repair protein RE.1
Solyc01g107580	78.0566	23.6707	70.2027	92.7708	71.8186	25.2728	62.3241	70.1952	58.8975	53.084	-1.10952	0.725403	0.918845	Pseudouridine synthase family protein (AHRD V3.3 *** A0A2U1QNN7_ARTAN)
Solyc01g107610	113.465	89.8173	96.8357	127.314	129.971	139.648	115.876	128.292	105.873	128.165	1.21056	0.0731842	0.421501	PRKR-interacting protein.1
Solyc01g107620	34.3849	41.453	19.3467	15.2256	28.3947	66.7579	28.4995	63.4766	25.4552	43.0326	1.69052	0.0902944	0.457229	Reticulon-like protein (AHRD V3.3 *** A0A1U8DZC5_CAPAN)
Solyc01g107630	85.008	101.882	61.4854	80.1757	90.9141	62.0484	54.7986	70.1754	80.8338	68.2463	-1.18444	0.230568	0.648895	#N/A
Solyc01g107650	40.0582	55.4117	43.1108	55.9652	63.9651	60.4124	43.8324	67.6425	48.106	58.1796	1.2094	0.328289	0.728817	Ovary receptor kinase.1
Solyc01g107660	43.811	40.795	33.2294	44.6422	41.372	25.2236	45.6554	33.238	40.3519	35.474	-1.13751	0.405953	0.778684	Stress enhanced protein 1, chloroplastic (AHRD V3.3 *** A0A2G2W962_CAPBA)
Solyc01g107690	52.2952	58.4735	33.2879	64.8958	137.692	137.228	38.4633	55.9682	50.6968	79.861	1.57527	0.10633	0.484281	Unknown protein
Solyc01g107700	25.9207	13.6034	30.7198	34.5466	33.216	26.9291	32.0019	26.5315	24.7332	29.5207	1.19357	0.462093	0.810778	Kynurenine formamidase (AHRD V3.3 *** A0A1J3JDK4_NOCCA)
Solyc01g107730	180.053	216.309	181.054	164.315	223.74	160.867	136.492	162.692	184.498	168.14	-1.09729	0.545199	0.851586	D-type cyclin-2
Solyc01g107740	25.2365	40.416	50.6495	24.279	71.6988	120.796	4.74602	29.7052	33.4655	33.2416	-1.00674	0.990435	0.996667	C2 domain-containing protein (AHRD V3.3 *** B1Q483_CAPCH)
Solyc01g107760	17.9635	16.5213	10.2914	3.56712	6.23902	4.74853	22.3968	9.32304	10.2166	8.86859	-1.152	0.728165	0.91944	Cysteine proteinase RD21a (AHRD V3.11 *** tr|A0A2G3BVF2|A0A2G3BVF2_CAPCH)
Solyc01g107820	28.7253	29.7455	22.5699	24.9393	17.156	30.8788	46.0902	47.7559	26.3345	32.8608	1.24782	0.333041	0.732542	TOMATO WOUND-INDUCED 1
Solyc01g107860	28.6663	44.5031	36.8354	29.7074	37.2926	40.4527	26.2449	29.4674	34.3735	32.8654	-1.04588	0.823387	0.952252	CBS domain-containing protein-like (AHRD V3.3 *** B8AP73_ORYSI)
Solyc01g107880	120.118	136.907	85.9772	160.021	168.256	137.185	156.134	105.628	122.645	139.681	1.13891	0.348329	0.745318	Zinc finger, RING-CH-type, Zinc finger, RING/FYVE/PHD-type (AHRD V3.3 *** A0A2U1NZJ9_ARTAN)
Solyc01g107890	16.8215	32.7186	18.194	23.9748	26.0176	38.7627	9.60267	19.1143	22.1353	20.7424	-1.06715	0.810453	0.948609	Filament-like plant protein 7 (AHRD V3.3 *** A0A314KPZ1_NICAT)
Solyc01g107910	2883.04	3327.03	2969.67	2515.72	3977.34	4463.56	1176.41	2578.23	2909.51	2708.87	-1.07407	0.786252	0.941406	#N/A
Solyc01g107990	101.554	150.891	130.132	141.638	123.076	138.487	150.888	116.525	129.638	131.572	1.01492	0.901226	0.9717	PI-PLC X domain-containing protein (AHRD V3.3 *** A0A2G2W995_CAPBA)
Solyc01g108010	62.2289	45.0236	48.4086	72.545	45.601	54.8915	57.6196	60.4197	56.0068	54.3322	-1.03082	0.816783	0.950651	Endonuclease or glycosyl hydrolase (AHRD V3.3 *** A0A2U1M201_ARTAN)
Solyc01g108020	74.05	66.0541	75.5318	59.4249	56.9179	79.7221	86.3558	66.8372	68.4511	71.5376	1.04509	0.689106	0.908469	Thioredoxin M3, chloroplastic (AHRD V3.3 *** A0A1U8E6Y3_CAPAN)
Solyc01g108030	157.56	149.187	130.017	139.479	149.206	138.799	186.388	149.632	143.688	155.026	1.0789	0.408929	0.77989	Methylcrotonoyl-CoA carboxylase beta chain, mitochondrial (AHRD V3.11 *** tr|A0A1U8DZI7|A0A1U8DZI7_CAPAN)
Solyc01g108040	91.1478	49.7975	54.6577	24.8886	64.6946	56.9149	67.2988	78.0947	49.8484	66.3255	1.33054	0.204851	0.617112	Dynamin-related protein 3B (AHRD V3.3 *-* A0A2G2Y090_CAPAN)
Solyc01g108050	10.503	9.668	10.1502	11.7697	33.9962	26.1843	13.0601	11.8233	10.4948	19.2548	1.83471	0.0564571	0.37942	Dynamin-related protein 3B (AHRD V3.3 *-* A0A2G2Y090_CAPAN)
Solyc01g108080	4.78198	4.13906	7.32259	10.7382	6.15085	13.7035	24.7995	13.3007	6.28096	12.9128	2.05587	0.0253014	0.278903	ABSCISIC ACID-INSENSITIVE 5-like protein 7 (AHRD V3.3 *** A0A2G3BV73_CAPCH)
Solyc01g108110	69.0324	145.202	81.7547	90.1594	123.57	182.103	82.1838	89.0982	92.7123	113.298	1.22204	0.295052	0.703898	Glycoprotein 3-alpha-L-fucosyltransferase (AHRD V3.3 *** Q70FI9_ORYSJ)
Solyc01g108140	41.7436	44.6695	45.9169	19.8634	60.592	38.209	39.4428	30.8841	36.1125	40.9799	1.13479	0.674693	0.903353	B3 domain-containing protein (AHRD V3.11 *** tr|A0A1U8E8F3|A0A1U8E8F3_CAPAN)
Solyc01g108160	30.6523	34.0037	14.3085	34.9982	8.09494	13.6123	21.8273	32.429	26.8786	16.7117	-1.60838	0.201374	0.614848	autophagy-related protein 2-like (AHRD V3.3 *** A0A1S4AVK1_TOBAC)
Solyc01g108180	73.3337	46.4492	55.0716	57.088	46.2332	42.5811	69.2028	48.8032	57.2056	50.7792	-1.12656	0.49353	0.825784	Pentatricopeptide repeat (AHRD V3.3 *** A0A200QLP1_9MAGN)
Solyc01g108200	16.1641	12.9476	16.6944	6.18144	28.7957	12.6076	14.4781	20.5056	12.1227	18.1191	1.49464	0.187646	0.600399	Protein disulfide-isomerase SCO2 (AHRD V3.3 *** A0A2G3AT86_CAPCH)
Solyc01g108210	14.0642	16.9311	16.3024	15.8683	19.39	26.3511	7.53651	19.9048	15.7541	16.639	1.05616	0.850302	0.95895	Cytochrome P450 (AHRD V3.3 *** A0A200QZB6_9MAGN)
Solyc01g108220	63.0352	94.9567	51.7206	64.8555	68.6184	62.8166	46.1465	33.869	66.9391	50.9465	-1.31391	0.202352	0.615823	Unknown protein
Solyc01g108230	22.6515	21.4135	15.8022	16.5519	20.9305	15.8527	29.0521	20.4251	18.8729	21.0647	1.11614	0.611832	0.879526	LA.1
Solyc01g108250	33.0837	40.1012	15.9394	41.3261	16.4726	48.926	43.5015	53.6906	30.575	37.0404	1.21146	0.488838	0.822813	DEM2
Solyc01g108280	17.8938	35.7718	11.1463	18.0962	17.5584	18.7758	16.7398	20.334	18.9557	18.3027	-1.03568	0.894517	0.969462	Protein kinase (AHRD V3.3 *** O65765_CRAPL)
Solyc01g108290	122.496	201.346	194.233	139.729	157.908	209.306	107.144	126.594	160.849	145.51	-1.10542	0.622201	0.882419	SWIB/MDM2 domain containing protein (AHRD V3.3 *** B6SZA4_MAIZE)
Solyc01g108300	85.7031	109.678	96.1864	101.907	118.541	90.9249	65.6631	78.3292	97.9735	86.2877	-1.13543	0.355128	0.747927	Two-component response regulator ARR18 (AHRD V3.3 *** A0A2G2W9W9_CAPBA)
Solyc01g108330	55.9988	41.5695	53.8867	36.1391	54.8434	50.3946	25.4063	39.0004	46.1427	40.6799	-1.13429	0.498189	0.826675	transmembrane protein (AHRD V3.3 *-* AT2G26520.1)
Solyc01g108340	109.79	50.8996	56.3037	39.0654	69.8824	72.8558	53.8729	65.4152	59.2109	65.0834	1.09918	0.651426	0.894842	Peptidyl-prolyl cis-trans isomerase D (AHRD V3.3 *** A0A2G3BVL2_CAPCH)
Solyc01g108400	12.5357	82.7151	30.6162	37.8989	74.4651	29.5339	40.0609	30.2	33.1191	40.3878	1.21947	0.582831	0.870409	CDPK-related protein kinase (AHRD V3.3 *** A0A2G3AU42_CAPCH)
Solyc01g108420	9.25382	7.93766	4.99171	3.4708	14.0474	14.7362	5.97808	5.22531	5.97273	8.96735	1.50138	0.168951	0.58294	Unknown protein
Solyc01g108430	18.6481	19.0423	20.3541	15.451	15.8807	14.7362	20.0496	20.6636	18.2806	17.6458	-1.03597	0.819013	0.951188	C2H2 and C2HC zinc fingers superfamily protein (AHRD V3.3 *-* F4I3B1_ARATH)
Solyc01g108440	48.9294	35.6645	33.6806	40.1052	41.3981	52.7638	59.4877	45.4544	39.1829	49.2981	1.25815	0.130681	0.529762	Herbivore elicitor-regulated 1 (AHRD V3.11 *** tr|S5ZR43|S5ZR43_NICAT)
Solyc01g108490	47.2913	38.5555	48.9581	45.307	36.6188	71.0817	30.7314	34.0425	44.845	40.6225	-1.10395	0.67302	0.903087	Carboxypeptidase (AHRD V3.3 *** A0A1U8E723_CAPAN)
Solyc01g108500	134.738	130.199	106.677	100.063	134.229	138.679	182.562	173.978	116.98	155.934	1.333	0.0202689	0.254251	RNA-binding protein (AHRD V3.3 *** A0A2K3PBB6_TRIPR)
Solyc01g108510	18.6064	17.046	16.6762	7.86103	35.0411	36.3759	14.2393	19.0863	14.2796	24.2605	1.69897	0.0705281	0.415952	P-loop containing nucleoside triphosphate hydrolases superfamily protein (AHRD V3.3 *** A0A2U1PVD3_ARTAN)
Solyc01g108570	7.41142	7.06843	5.91589	5.214	13.5058	8.95908	13.1204	10.909	6.34021	11.4717	1.80936	0.000760278	0.061681	Alpha/beta-Hydrolases superfamily protein (AHRD V3.3 *** A0A2U1KC75_ARTAN)
Solyc01g108600	154.857	124.534	128.643	115.418	122.896	182.679	102.865	75.4137	130.083	114.878	-1.13236	0.430787	0.792368	Presequence protease chloroplastic/mitochondrial-like (AHRD V3.3 *** A0A2K3NZI3_TRIPR)
Solyc01g108610	21.4562	17.0744	19.7497	18.9697	15.285	17.1635	23.5046	15.6954	19.2477	17.638	-1.09127	0.54591	0.852309	Cyclin-dependent kinase inhibitor (AHRD V3.3 *** A0A2G2W9Z0_CAPBA)
Solyc01g108640	93.3726	92.4132	91.3578	78.9986	191.756	278.498	29.7478	75.9504	88.8341	104.807	1.1798	0.679409	0.904064	GDSL esterase/lipase (AHRD V3.3 *** A0A199UQJ3_ANACO)
Solyc01g108650	342.325	459.072	484.159	254.506	408.472	340.328	212.411	329.672	373.037	314.109	-1.1876	0.345175	0.743001	embryo defective 1273 (AHRD V3.3 *** AT1G49510.3)
Solyc01g108670	106.904	103.116	134.674	92.0519	116.959	113.144	79.663	89.9581	108.121	98.6826	-1.09564	0.509361	0.831435	Kinesin (AHRD V3.3 *** A0A200QYC3_9MAGN)
Solyc01g108800	25.2	15.7859	26.6134	13.7212	21.3712	13.7159	9.20183	6.79353	19.5228	11.6347	-1.67798	0.046831	0.352611	3-hydroxyisobutyryl-CoA hydrolase.1
Solyc01g108840	98.8632	107.016	122.399	117.873	110.515	88.9306	101.873	100.397	111.153	100.13	-1.11009	0.451743	0.804976	Receptor protein kinase (AHRD V3.3 *** A0A2R6PGK7_ACTCH)
Solyc01g108880	11.4366	12.3911	5.19449	4.31755	28.2192	12.8349	5.97808	5.22531	7.5084	10.3134	1.37358	0.424769	0.790258	2-oxoglutarate (2OG) and Fe(II)-dependent oxygenase superfamily protein (AHRD V3.3 *** A0A2U1MKU7_ARTAN)
Solyc01g108890	64.3893	99.7523	112.604	119.012	109.359	98.0248	66.5656	79.6481	96.3208	86.8269	-1.10934	0.513549	0.833797	BAT2 domain protein (AHRD V3.3 *** AT2G15860.1)
Solyc01g108910	11.1095	17.8524	12.6632	8.59137	22.3822	28.0961	10.7994	16.5735	12.1199	18.3164	1.51127	0.0863198	0.448171	maternal effect embryo arrest 14 Chr2:6921196-6921978 REVERSE LENGTH=203 201606 (AHRD V3.11 *** AT2G15890.1)
Solyc01g108920	16.2224	11.3108	13.0728	14.9715	29.8745	30.7222	15.4843	10.5671	13.7661	19.6856	1.43001	0.156791	0.564866	Phox domain-containing protein (AHRD V3.3 *** F4IJE1_ARATH)
Solyc01g108930	11.1678	10.5901	4.29167	8.25029	19.4025	16.9745	29.5332	8.98171	8.04436	17.1922	2.13718	0.0279342	0.289473	B3 domain-containing protein (AHRD V3.3 *** A0A1Q3CJU4_CEPFO)
Solyc01g108940	32.0787	19.6638	29.6236	15.0286	31.6651	24.6174	22.8566	41.2842	23.0202	29.2856	1.27217	0.51888	0.836036	Phox domain-containing protein (AHRD V3.11 *** tr|F4IJE1|F4IJE1_ARATH)
Solyc01g108970	7.56619	6.65906	11.211	12.3768	18.6302	11.8154	13.5636	7.02093	9.14399	12.0326	1.3159	0.423494	0.788857	Phox domain-containing protein (AHRD V3.3 *-* A0A2K3PK20_TRIPR)
Solyc01g109010	117.313	139.015	98.7144	110.879	177.854	156.589	96.5232	97.9792	115.587	127.394	1.10214	0.505145	0.830595	phox domain-containing protein (AHRD V3.3 *-* AT2G15900.1)
Solyc01g109020	7.50335	16.2631	15.5448	13.2365	12.1186	17.6645	23.3147	10.4575	12.5879	15.1148	1.20074	0.405827	0.778583	GDSL esterase/lipase 5-like (AHRD V3.3 *** A0A1U8FAQ0_CAPAN)
Solyc01g109040	35.8397	49.0686	48.4955	46.1117	38.2362	15.6039	9.53845	23.5441	44.5318	19.1323	-2.32757	0.00380206	0.128373	Cytochrome b6-f complex subunit 7 (AHRD V3.3 *** A0A1U8DXD4_CAPAN)
Solyc01g109110	12.6437	28.3522	14.1722	23.9906	24.1152	21.6956	15.4269	19.1466	18.6846	19.8271	1.06114	0.826057	0.953182	Extra-large guanine nucleotide-binding protein 2 (AHRD V3.3 *** A0A1U8DXD5_CAPAN)
Solyc01g109130	15.5643	20.7085	10.45	25.5837	9.47026	12.6906	13.7583	10.9557	17.1332	11.6015	-1.47682	0.118313	0.509724	Proteasome assembly chaperone 2 (AHRD V3.3 *** A0A1U8E8Q2_CAPAN)
Solyc01g109280	28.6323	50.6028	43.0484	32.1756	52.2054	51.4174	45.1409	41.4523	37.6382	47.3409	1.25779	0.142709	0.546685	RBR-type E3 ubiquitin transferase (AHRD V3.3 *** A0A2G2WA47_CAPBA)
Solyc01g109290	17.5167	29.1226	23.3889	39.8321	19.8657	16.1927	15.4519	17.1983	26.2562	17.0991	-1.53553	0.0372192	0.323763	S-adenosyl-L-methionine-dependent methyltransferases superfamily protein (AHRD V3.3 *** A0A2U1PZ59_ARTAN)
Solyc01g109330	70.5474	31.0614	44.1876	29.4349	39.0533	22.6873	112.427	36.6659	41.0881	43.7164	1.06397	0.85496	0.959358	Cytochrome c biogenesis protein CCS1, chloroplastic (AHRD V3.3 *** A0A2G2VTA9_CAPBA)
Solyc01g109340	16.8517	22.7846	18.2437	25.5488	19.9047	25.3776	30.2793	21.1617	20.568	23.852	1.15967	0.335269	0.733999	E3 ubiquitin-protein ligase (AHRD V3.3 *** A0A2G3D341_CAPCH)
Solyc01g109360	77.2779	53.7483	58.6174	22.7973	62.4251	53.8445	93.1695	74.7527	48.5381	69.5585	1.43307	0.149004	0.555014	Tyrosine-tRNA ligase-like protein (AHRD V3.3 *** A0A2K3P3P3_TRIPR)
Solyc01g109370	18.9953	15.6407	15.623	18.8673	11.114	15.3273	13.7241	13.2745	17.2026	13.2727	-1.29609	0.121872	0.514048	Acyltransferase domain-containing protein (AHRD V3.3 *** A0A1Q3CKP3_CEPFO)
Solyc01g109410	148.268	133.923	161.798	155.65	106.341	105.601	107.577	125.228	149.539	110.904	-1.34836	0.00496688	0.139332	Dolichyl-diphosphooligosaccharide--protein glycosyltransferase 48 kDa subunit (AHRD V3.3 *** A0A2G2WA56_CAPBA)
Solyc01g109450	22.8922	44.7306	26.4629	25.9002	48.5485	30.1287	53.0349	59.1176	28.9439	46.2763	1.59882	0.0482986	0.356222	Pseudouridine kinase (AHRD V3.3 *** A0A1J3EB77_NOCCA)
Solyc01g109460	1206.56	1010.5	922.687	684.624	438.552	192.794	2006.97	1827.55	936.802	746.245	-1.25535	0.608039	0.878955	Polyol monosaccharide transporter 4
Solyc01g109500	43.1405	11.4535	13.0356	16.7452	12.0918	5.21032	16.8476	11.5968	18.1222	10.5332	-1.72049	0.095261	0.465212	BURP domain-containing protein (AHRD V3.3 *-* A0A1Q3C0F5_CEPFO)
Solyc01g109580	39.789	26.483	24.4017	33.4568	30.6456	21.0045	20.5709	29.817	30.455	25.0668	-1.21495	0.225016	0.641089	Adenylyl cyclase-associated protein (AHRD V3.11 *** tr|A0A2G3BVT0|A0A2G3BVT0_CAPCH)
Solyc01g109590	90.3573	92.4646	115.063	57.4834	96.3468	122.444	66.9112	85.1959	86.2193	90.5572	1.05031	0.772234	0.936295	Protein kinase domain (AHRD V3.3 *** A0A200Q940_9MAGN)
Solyc01g109600	139.045	120.474	136.532	111.936	105.904	139.346	112.771	139.747	126.492	123.491	-1.0243	0.799526	0.944283	BTB/POZ domain-containing protein (AHRD V3.3 *-* A0A2I0VL56_9ASPA)
Solyc01g109610	435.228	138.487	79.1732	99.346	82.8778	121.6	410.792	225.507	147.558	174.799	1.18461	0.65693	0.896885	Erythronate-4-phosphate dehydrogenase family protein (AHRD V3.11 *** tr|Q8VYC6|Q8VYC6_ARATH)
Solyc01g109630	36.6342	22.1264	24.8278	36.3904	17.9964	28.8333	11.246	28.116	29.2537	20.126	-1.45353	0.120713	0.513087	Mitochondrial transcription termination factor family protein (AHRD V3.11 *** tr|A0A1P8AXV9|A0A1P8AXV9_ARATH)
Solyc01g109640	166.812	118.748	128.463	119.24	198.646	148.714	65.2307	160.133	131.982	132.538	1.00422	0.985705	0.995557	AP complex subunit sigma (AHRD V3.3 *** A0A2G3BVV9_CAPCH)
Solyc01g109650	62.3686	96.2416	75.9622	48.8229	114.407	146.23	63.5788	94.4106	68.6891	100.105	1.45736	0.0573494	0.382413	Protein kinase domain (AHRD V3.3 *** A0A200Q977_9MAGN)
Solyc01g109660	489.657	449.6	470.135	416.59	502.826	533.213	777.767	672.579	455.683	611.967	1.34297	0.00993311	0.189536	meloidogyne-induced giant cell protein DB275
Solyc01g109670	50.7289	45.8882	19.3271	17.9514	13.0187	17.7664	15.0063	16.8935	29.9782	15.5611	-1.92648	0.0221651	0.265628	Transcription factor RADIALIS (AHRD V3.3 *-* A0A2I0VXE6_9ASPA)
Solyc01g109700	12.5357	54.2986	43.8028	107.965	44.4695	63.4651	86.0484	72.0484	42.3575	64.6757	1.5269	0.243659	0.661789	bHLH transcription factor 010
Solyc01g109730	38.7295	67.2572	46.475	68.4502	126.429	166.27	18.879	41.7003	53.653	63.7815	1.18878	0.730001	0.919937	Protein KTI12-like protein (AHRD V3.3 *** A0A2G2WA44_CAPBA)
Solyc01g109750	20.7334	33.3131	28.1672	23.1631	26.0671	26.0081	12.6471	23.6211	25.9093	21.214	-1.22133	0.28288	0.697276	syntaxin-112-like (AHRD V3.3 *** A0A2I4HRN6_9ROSI)
Solyc01g109760	16.8517	11.1366	9.35176	14.308	10.3879	19.2905	9.47927	13.9437	12.5883	12.7572	1.01342	0.943758	0.984308	Major facilitator superfamily (AHRD V3.3 *-* A0A2U1KPS1_ARTAN)
Solyc01g109770	82.1046	79.5048	112.337	119.008	103.273	141.804	146.396	135.704	96.653	130.602	1.35125	0.0309076	0.299981	Protein RE.1
Solyc01g109780	26.6028	27.2805	17.4132	30.7232	20.4282	24.4578	15.7785	18.5243	24.9621	19.5485	-1.27693	0.1314	0.529762	F-box family protein (AHRD V3.3 *-* AT2G16365.6)
Solyc01g109790	562.687	430.712	397.185	336.437	587.38	440.937	372.583	513.328	424.216	471.768	1.11209	0.376394	0.761764	ADP-glucose pyrophosphorylase large subunit 1
Solyc01g109830	107.777	94.235	56.2648	83.9726	33.2733	82.2811	56.2839	67.051	83.2296	56.6952	-1.46802	0.0685041	0.410711	Bifunctional dihydrofolate reductase-thymidylate synthase (AHRD V3.3 *** A0A2G3BW20_CAPCH)
Solyc01g109870	9.86073	10.4413	12.4281	4.4744	8.76667	6.60349	9.9697	6.98534	8.69862	7.96837	-1.09164	0.80109	0.944416	Sec14p-like phosphatidylinositol transfer family protein (AHRD V3.3 *** A0A2U1MGM1_ARTAN)
Solyc01g109890	53.8212	45.4091	34.1531	63.533	28.6011	56.6999	78.3846	43.2364	47.9879	48.4185	1.00897	0.973652	0.992055	Chaperone protein dnaJ 10 (AHRD V3.3 *** A0A2G3BVX6_CAPCH)
Solyc01g109910	26.3685	55.5987	54.9993	35.7278	17.2655	15.6039	56.8559	30.4587	41.1982	26.1351	-1.57635	0.116243	0.505734	RING/U-box superfamily protein (AHRD V3.3 *** Q8L7K7_ARATH)
Solyc01g109930	34.7945	31.4248	13.3898	30.3936	9.178	12.6123	27.1375	25.6619	25.8276	16.85	-1.5328	0.208755	0.621799	Inositol-1-monophosphatase (AHRD V3.3 *** B6SMK8_MAIZE)
Solyc01g109940	379.079	347.381	448.762	435.964	307.601	275.245	436.769	349.54	400.637	337.182	-1.18819	0.14895	0.555014	26S proteasome regulatory subunit (AHRD V3.11 *** tr|A8IR41|A8IR41_CHLRE)
Solyc01g109980	7.6795	7.75341	6.63587	15.3793	10.2171	9.00949	9.76289	8.01344	8.82907	9.21205	1.04338	0.877916	0.964862	BEL1-like homeodomain protein 7 (AHRD V3.3 *** A0A2G3BW58_CAPCH)
Solyc01g110000	294.295	185.986	172.093	52.1977	58.3293	51.1362	375.416	298.707	148.908	135.236	-1.1011	0.839187	0.955906	Beta-galactosidase (AHRD V3.3 *** A0A2G3BW46_CAPCH)
Solyc01g110030	27.616	17.2801	46.7493	14.3964	29.1642	35.6208	18.366	32.8848	23.8058	28.1443	1.18225	0.554195	0.855883	WD40 repeat (AHRD V3.3 *** A0A200QE38_9MAGN)
Solyc01g110060	47.191	26.0123	15.0426	25.3209	8.06012	15.0611	41.2976	13.4743	26.1493	16.1216	-1.62201	0.213967	0.629067	Purple acid phosphatase (AHRD V3.3 *** A0A0C5AJS1_SOLLC)
Solyc01g110100	62.0191	80.9519	57.3505	88.9684	96.0382	98.3546	67.8991	108.884	71.1429	91.4148	1.28495	0.158613	0.568375	RBR-type E3 ubiquitin transferase (AHRD V3.3 *** A0A2G2XNK4_CAPBA)
Solyc01g110110	50.1771	37.7427	64.0659	21.6106	64.8742	65.3132	77.1819	47.6249	40.24	62.8211	1.56116	0.0815647	0.43842	Cysteine protease (AHRD V3.3 *** Q9AUC5_IPOBA)
Solyc01g110130	617.484	677.773	606.775	569.804	411.343	420.929	393.981	360.63	616.759	396.039	-1.55732	0.000186749	0.0327388	DNA helicase (AHRD V3.3 *** A0A2G3BW33_CAPCH)
Solyc01g110150	74.7671	93.792	99.0905	68.1018	111.124	114.944	60.969	82.2402	82.9405	89.4585	1.07859	0.609138	0.879486	#N/A
Solyc01g110160	5.47959	15.1867	5.56528	22.6926	9.27428	11.388	5.4915	8.48312	10.125	8.37518	-1.20893	0.588766	0.872474	hypothetical protein Chr2:9150162-9151752 FORWARD LENGTH=252 201606 (AHRD V3.11 *** AT2G21385.5)
Solyc01g110180	7.38294	20.1985	7.55698	4.74645	7.13323	33.095	4.46566	7.35648	8.55198	9.38428	1.09732	0.819407	0.951188	Zinc finger, B-box (AHRD V3.11 *** tr|A0A2U1KI66|A0A2U1KI66_ARTAN)
Solyc01g110190	25.848	29.7786	24.921	46.7074	22.6276	47.71	40.8771	38.0182	30.766	35.9898	1.16979	0.454327	0.805954	Kinesin-related protein (AHRD V3.3 *** D3YBF5_TRIRP)
Solyc01g110210	46.1072	125.147	142.64	72.6016	120.219	181.863	5.54258	54.5165	87.9212	50.6979	-1.73422	0.487303	0.822659	Protein Mei2 (AHRD V3.3 *-* A0A0U9HRM8_KLENI)
Solyc01g110230	178.069	296.405	271.359	209.22	430.629	459.106	16.1011	221.798	233.967	163.007	-1.43532	0.588219	0.872474	Protein Mei2 (AHRD V3.3 *-* A0A0U9HRM8_KLENI)
Solyc01g110240	47.1284	109.388	94.5047	33.2937	174.227	177.23	10.7308	49.8995	63.4624	63.7669	1.0048	0.994337	0.997522	Protein Mei2 (AHRD V3.3 *-* A0A0U9HRM8_KLENI)
Solyc01g110250	9.01268	10.1385	14.0474	17.9217	5.52316	12.7534	29.0541	6.8836	12.3155	10.8945	-1.13043	0.690162	0.908848	#N/A
Solyc01g110270	110.298	111.351	115.544	124.495	92.5413	77.4651	93.9648	104.458	115.29	91.5876	-1.25879	0.0382874	0.327231	RNA-binding CR.1
Solyc01g110280	32.8161	25.7008	25.4008	33.4419	16.7228	21.1569	12.9342	11.0384	29.0933	14.9917	-1.94062	0.0021021	0.100874	Protein DETOXIFICATION (AHRD V3.3 *** A0A1J3G5W8_NOCCA)
Solyc01g110340	76.9727	122.097	84.5017	96.4492	72.3385	126.846	107.175	162.516	93.5516	112.437	1.20187	0.292693	0.702087	Endoglucanase (AHRD V3.11 *** tr|A0A2G3BW02|A0A2G3BW02_CAPCH)
Solyc01g110360	442.382	484.838	358.081	331.051	608.56	580.739	613.986	870.548	399.317	659.263	1.65098	0.000343077	0.0439645	Fructose-bisphosphate aldolase (AHRD V3.3 *** Q9SXX5_NICPA)
Solyc01g110370	34.2974	42.6279	25.3146	19.9861	51.4129	32.8394	37.2603	42.4787	29.3267	40.4316	1.37866	0.224947	0.641089	Zinc finger, B-box (AHRD V3.3 *** A0A2U1LAI4_ARTAN)
Solyc01g110380	141.866	167.659	163.678	160.937	133.22	190.916	184.753	215.175	158.211	178.319	1.1271	0.347733	0.744802	Kinesin-like protein (AHRD V3.3 *** A0A2G2XNI5_CAPBA)
Solyc01g110440	691.596	510.309	487.859	621.83	860.861	529.811	463.648	645.981	572.022	607.947	1.0628	0.634558	0.885376	#N/A
Solyc01g110460	17.7705	12.0241	13.8095	23.6875	17.1804	11.6319	16.8112	20.8631	16.2597	16.271	1.0007	0.997187	0.998691	3-oxo-5-alpha-steroid 4-dehydrogenase family protein (AHRD V3.3 *** A0A2U1L3J9_ARTAN)
Solyc01g110540	321.779	305.86	287.703	240.145	239.704	203.127	236.214	231.268	287.16	227.099	-1.26447	0.0287005	0.290602	ATP synthase E chain (AHRD V3.3 *** Q8GXE7_ARATH)
Solyc01g110550	31.0708	43.0932	28.7078	45.1924	15.554	30.5282	37.0422	20.04	36.3042	24.366	-1.48995	0.106971	0.486221	Ribosome-binding factor A (AHRD V3.3 *** A0A200QQX5_9MAGN)
Solyc01g110640	156.132	154.382	179.715	128.298	181.465	266.048	107.132	181.298	153.541	174.991	1.13971	0.452267	0.805142	DNA mismatch repair protein MLH3 (AHRD V3.3 *-* A0A2G3A9Q9_CAPAN)
Solyc01g110680	19.9738	40.724	43.8028	19.5636	104.215	70.7151	34.0795	25.6874	28.8945	50.3981	1.74421	0.305162	0.713905	Small auxin up-regulated RNA12
Solyc01g111180	95.6814	151.712	103.712	99.7021	304.87	222.609	60.3201	183.81	110.687	165.624	1.49633	0.184603	0.598566	#N/A
Solyc01g111340	138.93	202.965	156.965	130.593	249.476	307.715	5.00363	57.1974	155.055	68.4636	-2.26478	0.359524	0.751078	Endo-1,4-beta-xylanase (AHRD V3.3 *** A0A1J3CP06_NOCCA)
Solyc01g111360	131.152	170.891	167.281	141.137	180.405	178.915	142.952	195.792	151.669	173.368	1.14307	0.165654	0.577815	Peptidyl-prolyl cis-trans isomerase (AHRD V3.3 *** A0A1U8DY34_CAPAN)
Solyc01g111370	26.1843	23.3981	24.1758	30.2	29.8827	24.1374	25.5846	26.3248	25.8614	26.4006	1.02085	0.865949	0.962577	Choline transporter-like protein (AHRD V3.3 *** A0A2U1NLL4_ARTAN)
Solyc01g111380	57.0273	76.3563	67.5072	50.5552	70.8445	91.7984	59.1691	67.981	62.0884	71.5165	1.15185	0.288255	0.699875	Actin-depolymerizing factor-like protein (AHRD V3.3 *** A0A2K3P088_TRIPR)
Solyc01g111410	21.6099	19.9561	18.7079	15.4175	11.2526	15.3787	12.8528	12.6336	18.7798	12.9472	-1.4505	0.014556	0.222356	Protein prenyltransferase alpha subunit repeat-containing protein.1
Solyc01g111420	99.9144	70.6721	76.9708	86.0653	45.3071	34.4304	111.396	57.4343	82.7004	56.2067	-1.47136	0.110083	0.493403	Ribosomal protein .1
Solyc01g111440	24.0435	23.9886	24.1603	27.5621	31.9422	31.9049	34.7988	28.5173	24.8945	31.712	1.27385	0.0678859	0.409057	#N/A
Solyc01g111510	42.5547	52.3821	48.3404	25.7431	43.6752	45.8847	41.7387	62.3546	40.8108	47.789	1.17099	0.356154	0.74904	Ascorbate peroxidase (AHRD V3.3 *** Q8W4V7_CAPAN)
Solyc01g111550	91.7402	136.59	107.992	61.0487	94.1547	139.941	55.078	81.2189	95.3371	87.6205	-1.08807	0.667186	0.900457	protein MCM10 homolog (AHRD V3.3 *** A0A2I4EWG7_9ROSI)
Solyc01g111560	239.241	193.447	167.761	182.829	202.692	171.36	218.33	248.41	194.104	208.333	1.07331	0.502692	0.829023	Rac-like GTP binding protein (AHRD V3.3 *** Q9S821_PHYPA)
Solyc01g111580	14.3099	11.0275	17.6067	13.6608	18.9633	21.2266	18.1874	21.6977	13.9578	19.9638	1.4303	0.0656244	0.403755	Basic-leucine zipper (BZIP) transcription factor family protein (AHRD V3.3 *** A0A1Y1IM66_KLENI)
Solyc01g111590	146.632	109.64	97.8582	81.2824	98.2984	91.7984	70.6318	66.1318	106.34	80.5746	-1.31977	0.100034	0.473284	WD-40 repeat-containing protein MSI1 (AHRD V3.11 *** tr|A0A2G3AUE9|A0A2G3AUE9_CAPCH)
Solyc01g111610	335.964	367.332	372.007	269.437	298.541	302.569	389.215	401.281	333.495	344.641	1.03342	0.770079	0.935678	SBP (S-ribonuclease binding protein) family protein (AHRD V3.3 *** A0A2U1N6W4_ARTAN)
Solyc01g111620	97.607	108.228	101.136	86.1318	85.7415	88.5444	85.798	81.7571	97.9429	85.4258	-1.14653	0.131527	0.529762	High-affinity nickel-transport family protein (AHRD V3.3 *** F4JM82_ARATH)
Solyc01g111640	30.9823	39.4806	53.3057	24.4291	45.4382	66.8869	8.44092	31.38	35.5258	29.9537	-1.18602	0.694399	0.910417	SKP1-like protein (AHRD V3.3 *** O82463_NICCL)
Solyc01g111680	14.2445	27.617	23.0931	4.90608	35.6606	18.845	23.1192	37.0318	14.5298	27.5412	1.8955	0.0652356	0.402661	Ubiquitin-conjugating enzyme (AHRD V3.11 *** tr|A0A200Q025|A0A200Q025_9MAGN)
Solyc01g111690	59.3871	71.0594	58.9805	65.9779	61.0121	51.299	66.3247	35.5257	63.6583	52.1118	-1.22157	0.325193	0.727331	trafficking protein particle complex subunit 2-like protein (AHRD V3.3 *** A0A2I4GC85_9ROSI)
Solyc01g111730	72.764	67.8985	46.808	74.8758	55.1929	68.1959	73.7721	74.783	64.5074	67.5047	1.04647	0.758704	0.933181	Protein phosphatase 2C (AHRD V3.3 *** A0A2U1M4W5_ARTAN)
Solyc01g111770	21.3989	19.197	13.3102	24.0905	21.1686	30.0141	13.3622	11.952	19.0508	17.8478	-1.0674	0.771577	0.936067	DUF616 domain-containing protein (AHRD V3.3 *** A0A1Q3CAK1_CEPFO)
Solyc01g111840	65.6849	86.369	55.3985	54.1415	52.1758	53.9348	39.7985	44.2313	64.2263	47.1774	-1.36138	0.0775723	0.431565	Major facilitator superfamily protein (AHRD V3.3 *** A0A1P8BEX6_ARATH)
Solyc01g111860	18.5812	7.49573	13.8769	19.9519	16.34	20.5692	15.7776	10.2206	14.0133	15.258	1.08882	0.702106	0.911856	Ddb1-and cul4-associated factor-like protein (AHRD V3.11 *** tr|A0A2K3PHM5|A0A2K3PHM5_TRIPR)
Solyc01g111880	10.794	11.4591	15.6265	10.737	5.72134	12.0765	13.1449	17.5563	12.0024	11.2372	-1.0681	0.766947	0.935196	MAP kinase kinase kinase 11
Solyc01g111910	57.6964	64.8248	30.9751	42.7936	29.7627	39.6113	85.097	65.5012	47.1868	50.6307	1.07298	0.750339	0.930102	RNA polymerase II-associated protein.1
Solyc01g111920	83.7984	43.8463	45.1749	42.9978	54.759	43.4336	33.2574	53.1472	51.6866	45.2806	-1.14147	0.466275	0.812287	F-box protein SKIP23 (AHRD V3.3 *** A0A2I4EWQ4_9ROSI)
Solyc01g111970	245.382	13.0187	9.08077	11.123	5.22531	8.37717	223.012	30.5259	23.8335	23.3642	-1.02009	0.980629	0.994229	L-ascorbate oxidase-like protein (AHRD V3.11 *** tr|A0A1U8DYA0|A0A1U8DYA0_CAPAN)
Solyc01g111990	106.205	76.2984	76.5805	80.5484	57.0485	92.1502	68.8554	65.12	84.0832	69.6784	-1.20673	0.143605	0.547848	Alanine--tRNA ligase (AHRD V3.3 *** K3XV85_SETIT)
Solyc01g112000	234.692	127.024	144.142	342.368	185.034	51.1345	352.034	249.875	195.847	169.851	-1.15305	0.686559	0.906914	#N/A
Solyc01g112040	50.8483	81.7238	119.63	70.0188	147.048	103.798	66.8007	92.7151	76.8104	98.6042	1.28374	0.196421	0.608624	#N/A
Solyc01g112050	90.5026	114.676	134.879	81.9651	131.407	91.7234	66.068	90.1335	103.497	92.0436	-1.12443	0.513267	0.833676	DUF630 family protein, putative (DUF630 and DUF632) (AHRD V3.3 *-* Q9XI02_ARATH)
Solyc01g112060	36.6899	40.1624	30.8871	32.1789	69.45	22.3998	22.9385	52.0352	34.7879	36.9143	1.06112	0.80059	0.944416	NAD(P)-binding domain-containing protein (AHRD V3.11 *** tr|A0A2U1M2T6|A0A2U1M2T6_ARTAN)
Solyc01g112070	19.363	17.4639	18.1562	15.8992	12.7919	15.6233	16.5251	14.2454	17.6758	14.7276	-1.20018	0.222331	0.636836	O-fucosyltransferase family protein (AHRD V3.11 *** tr|A0A061DZG6|A0A061DZG6_THECC)
Solyc01g112090	8.06989	15.0309	11.2029	8.03758	20.8958	12.7617	11.2707	12.1536	10.223	13.8247	1.35232	0.126555	0.521814	Protein DETOXIFICATION (AHRD V3.3 *** A0A328D307_9ASTE)
Solyc01g112100	87.3387	111.129	86.5638	87.7151	104.072	89.4752	114.601	127.966	92.6534	108.101	1.16672	0.145905	0.550845	Flavin-containing monooxygenase (AHRD V3.3 *** A0A2G3BW83_CAPCH)
Solyc01g112140	21.1558	10.6629	13.2088	12.7991	11.6064	12.4892	14.601	15.8875	13.9746	13.5415	-1.03198	0.88397	0.966284	Flavin-containing monooxygenase (AHRD V3.11 *** tr|A0A1U8E9P1|A0A1U8E9P1_CAPAN)
Solyc01g112160	79.884	60.1163	106.898	67.7151	59.484	59.4413	89.6806	85.8103	76.7851	72.224	-1.06315	0.668466	0.90102	Phosphoglycerate mutase family protein (AHRD V3.3 *** A0A2U1PWX4_ARTAN)
Solyc01g112170	22.8762	15.7176	11.9022	22.1543	10.5787	21.86	28.0352	13.962	17.5474	17.3454	-1.01165	0.960605	0.988581	Calcium-dependent protein kinase SK5 (AHRD V3.3 *** A0A2I0W0P2_9ASPA)
Solyc01g112180	17.0639	13.1206	13.1772	11.5394	7.98012	10.9712	13.9958	7.72111	13.5834	9.86245	-1.37729	0.207326	0.619882	Integral membrane protein hemolysin-III-like protein (AHRD V3.3 *** A0A2K3N7X1_TRIPR)
Solyc01g112190	18.1698	17.588	16.2264	20.0334	18.257	20.3669	24.9611	27.1052	17.9529	22.3959	1.24747	0.131781	0.529762	Plant regulator RWP-RK family protein, putative (AHRD V3.3 *** A0A061FD78_THECC)
Solyc01g112230	9.9798	14.6936	29.1043	13.4194	11.6534	20.3353	9.87952	17.2337	15.4698	14.1728	-1.09152	0.698447	0.911343	Plant EC metallothionein-like protein (AHRD V3.3 *** A0A200PQZ1_9MAGN)
Solyc01g112250	98.9513	81.9785	123.582	74.2489	64.2637	114.591	62.438	83.9904	92.8841	78.8313	-1.17826	0.307681	0.715996	Calcium dependent protein kinase (AHRD V3.3 *** Q43676_VIGRR)
Solyc01g112310	52.5057	41.7322	46.7856	63.8014	51.4408	36.9614	69.0441	61.1163	50.5714	53.2212	1.0524	0.73143	0.920162	Chloride channel protein (AHRD V3.3 *** A0A1U8E0X8_CAPAN)
Solyc01g112320	18.7851	29.3849	13.1282	20.4064	7.91304	14.0946	7.98796	24.364	19.61	12.1379	-1.61559	0.0780729	0.43183	Protein FAR1-RELATED SEQUENCE 5 (AHRD V3.3 *** A0A2G3BWC6_CAPCH)
Solyc01g113490	12.5357	3.24789	5.19449	19.5636	2.87251	4.40955	4.40955	3.28356	8.02021	3.68001	-2.1794	0.0282777	0.289856	#N/A
Solyc01g113620	17.0633	21.0596	16.3162	25.2347	14.7902	25.3669	26.3759	36.5994	19.6125	24.5319	1.25083	0.370943	0.758296	Disease resistance protein (TIR-NBS-LRR class) (AHRD V3.3 *-* A0A2K3P6K1_TRIPR)
Solyc02g005110	94.5484	67.8818	83.2151	96.2984	30.5329	131.132	35.8217	106.215	84.6851	62.4744	-1.35552	0.31338	0.720135	MADS-box protein SO.1
Solyc02g005180	184.002	256.36	253.926	142.103	209.8	297.604	253.341	323.473	203.117	267.453	1.31675	0.0718245	0.418799	Sugar facilitator protein 2
Solyc02g005200	25.4588	26.8528	17.328	18.971	28.8223	35.6524	25.3605	36.523	21.7729	31.2346	1.43456	0.0314715	0.301506	#N/A
Solyc02g005210	31.6942	28.72	15.3754	21.7591	23.1531	19.4532	12.8433	21.5952	23.4913	18.8	-1.24954	0.255261	0.673058	Cofactor assembly of complex C (AHRD V3.3 *** A0A2U1QJQ4_ARTAN)
Solyc02g005490	10.7625	9.33633	8.19806	9.94925	8.96342	8.17745	15.4054	10.6524	9.51476	10.4726	1.10066	0.683035	0.90417	60S acidic ribosomal protein P1-like (AHRD V3.3 --* XP_026407736.1),Pfam:PF00428
Solyc02g005510	37.3439	40.2	42.3161	27.1295	28.2192	50.2159	44.6361	32.5288	36.2325	37.8735	1.04529	0.772488	0.936302	Transcriptional coactivator/pterin dehydratase (AHRD V3.3 *** A0A1P8AWX1_ARATH)
Solyc02g005530	4.33051	20.2606	6.51463	9.73913	11.464	7.8628	12.1365	9.13817	8.63774	9.99923	1.15762	0.62868	0.884637	#N/A
Solyc02g010610	16.8464	11.6875	34.0334	4.57702	16.7678	16.6781	13.8383	9.53028	13.2336	13.8581	1.04719	0.918169	0.977456	#N/A
Solyc02g010630	118.716	68.6723	98.4827	106.134	120.914	94.7334	81.0894	97.6058	96.0784	97.5787	1.01562	0.907346	0.973747	Ribonuclease H domain (AHRD V3.11 *-* tr|A0A200QC70|A0A200QC70_9MAGN)
Solyc02g011810	13.1353	10.7316	9.19009	9.66459	12.84	13.3562	10.0858	12.6761	10.5779	12.1685	1.15036	0.365999	0.754692	NAD(P)H-quinone oxidoreductase subunit H, chloroplastic (AHRD V3.3 *-* A0A2G3B5W4_CAPCH)
Solyc02g014090	79.1719	77.5817	84.4171	72.5859	66.5883	75.1383	90.0911	98.2075	78.3255	81.5683	1.0414	0.696011	0.910636	Peptidoglycan-binding LysM domain-containing protein (AHRD V3.3 *** Q8VYP8_ARATH)
Solyc02g014130	302.193	251.227	257.359	405.317	377.121	364.071	282.646	262.286	298.312	317.63	1.06476	0.581363	0.870409	ENHANCER OF AG-4 protein 2-like (AHRD V3.3 *** A0A2I4ED54_9ROSI)
Solyc02g014150	23.9957	19.4154	17.2621	20.1346	14.2431	14.909	18.5213	15.955	20.0599	15.8272	-1.26743	0.215062	0.630613	Photosystem II stability/assembly factor HCF136 (AHRD V3.3 *** A0A1Y1IDD9_KLENI)
Solyc02g014180	112.374	91.7839	122.594	169.795	135.218	116.582	202.567	143.829	121.048	146.393	1.20938	0.266455	0.68465	Zinc finger C3HC4 type (RING finger) protein (AHRD V3.3 *-* A0A2K3NL88_TRIPR)
Solyc02g014220	34.6546	23.5943	33.5815	36.0364	32.2654	41.1562	40.7308	27.6135	31.5393	34.9586	1.10841	0.477931	0.817105	Endoglucanase (AHRD V3.3 *** A0A2G3D2B5_CAPCH)
Solyc02g014230	10.972	12.9164	7.84808	9.44408	12.749	14.2618	13.1091	12.5612	10.1237	13.1542	1.29935	0.110227	0.493711	Disease resistance protein RGA2 (AHRD V3.3 *-* A0A2G2XMC9_CAPBA)
Solyc02g014310	513.005	421.024	377.951	478.921	272.724	257.334	421.413	318.666	444.664	311.578	-1.42714	0.00811636	0.174058	glycine rich protein X55695
Solyc02g014360	13.1264	16.1324	15.8191	19.7684	13.3807	19.0052	9.61742	16.1878	16.0417	14.1059	-1.13723	0.488289	0.822659	Pentatricopeptide repeat-containing protein (AHRD V3.3 *** A0A1U8FF53_CAPAN)
Solyc02g014380	63.7752	78.9538	98.8459	75.6689	53.984	60.673	63.4491	47.9874	78.3385	56.1957	-1.39403	0.0243371	0.275451	protein odr-4 homolog (AHRD V3.3 *** A0A2I4GXT3_9ROSI)
Solyc02g014430	11.5824	13.0846	15.1001	11.7249	14.3527	14.8681	15.4754	9.5506	12.7986	13.3265	1.04125	0.804166	0.94622	Equilibrative nucleotide transporter like (AHRD V3.3 *** A0A2R6QTM2_ACTCH)
Solyc02g014460	72.3263	34.1513	50.8719	42.6334	20.3928	35.4729	77.1258	39.8284	48.1097	38.6093	-1.24607	0.400071	0.776578	DNA damage-binding protein CMR1 (AHRD V3.11 *** tr|U9T3R7|U9T3R7_RHIID)
Solyc02g014520	12.1665	11.2346	17.3265	6.31306	9.22283	9.65627	9.29114	12.1189	11.0578	10.0069	-1.10501	0.639455	0.887434	SET domain-containing protein (AHRD V3.3 *** A0A1Q3AV79_CEPFO)
Solyc02g014530	21.7997	19.6114	13.3896	19.9001	25.3574	19.0671	13.3345	14.938	18.3715	17.6163	-1.04287	0.829577	0.954144	glycerophosphodiester phosphodiesterase GDPDL6-like (AHRD V3.3 *** A0A2I4H2H1_9ROSI)
Solyc02g014620	2.61199	17.2762	4.65523	16.3807	6.24193	15.724	7.55691	12.3911	7.65902	9.79117	1.27838	0.621681	0.882419	Unknown protein
Solyc02g014650	3.76674	4.40955	3.37784	3.24789	6.24193	2.65469	6.75775	31.6849	3.67409	7.71786	2.10062	0.0768775	0.43026	Unknown protein
Solyc02g014720	22.9836	29.44	14.3915	11.5937	17.0761	29.6538	29.2522	24.9472	18.3303	24.6554	1.34506	0.212511	0.626252	HD domain-containing protein (AHRD V3.11 *** tr|A0A1Q3BWL8|A0A1Q3BWL8_CEPFO)
Solyc02g014730	5.4436	13.1156	30.6432	7.08326	9.83921	5.04343	5.31463	6.33761	11.1573	6.39398	-1.74497	0.0994284	0.473284	Cytochrome P450 (AHRD V3.3 *** A0A2U1QJ26_ARTAN)
Solyc02g014740	25.3129	11.1561	37.0013	30.815	24.8433	36.1005	29.8735	20.7353	23.8209	27.3011	1.1461	0.595858	0.874533	DNA-binding storekeeper transcriptional regulator (AHRD V3.11 *-* tr|A0A2K3LQD1|A0A2K3LQD1_TRIPR)
Solyc02g014770	128.94	105.342	117.033	123.229	97.6953	93.6614	69.4868	84.7764	118.305	85.6846	-1.3807	0.0104454	0.192142	RNA helicase DEAH-box7
Solyc02g014830	10.7166	5.98757	5.29173	32.0217	8.14599	10.4383	3.87511	6.83996	10.2115	6.89014	-1.48204	0.266036	0.684014	Carboxypeptidase (AHRD V3.11 *** tr|A0A2G2XBM8|A0A2G2XBM8_CAPBA)
Solyc02g020890	21.057	16.5668	16.0098	19.363	16.4444	15.724	13.2858	16.1905	18.1342	15.357	-1.18084	0.22518	0.641089	alpha/beta-Hydrolases superfamily protein (AHRD V3.3 *** AT3G19970.5)
Solyc02g020910	84.1883	86.9577	52.0558	90.3225	133.356	89.3029	104.25	106.883	76.596	107.328	1.40123	0.0444477	0.34481	#N/A
Solyc02g020940	248.139	236.423	186.571	197.501	290.051	246.124	238.407	291.597	215.625	265.419	1.23093	0.0236667	0.272893	Glyceraldehyde-3-phosphate dehydrogenase (AHRD V3.3 *** A0A2G3D2C2_CAPCH)
Solyc02g021020	173.798	182.09	140.382	139.715	136.007	102.715	195.465	288.632	157.842	167.553	1.06153	0.740945	0.925012	Pentatricopeptide repeat-containing protein (AHRD V3.3 *** A0A2G3D2E2_CAPCH)
Solyc02g021060	14.4159	8.16939	8.93932	21.137	4.92217	6.06037	8.48127	6.68113	12.2136	6.41197	-1.90482	0.0182907	0.243316	Uracil-DNA glycosylase (AHRD V3.3 *** A0A2G2XBC7_CAPBA)
Solyc02g021100	52.9164	50.5667	47.8028	61.5823	48.476	48.2367	38.5631	78.0222	52.9775	51.502	-1.02865	0.876718	0.964862	Methyl-CpG-binding domain protein 4-like protein (AHRD V3.3 *** MBD4L_ARATH)
Solyc02g021140	42.4931	23.9696	22.326	26.7723	32.4996	16.7112	21.055	16.1011	27.9331	20.7145	-1.34848	0.138365	0.541035	Superoxide dismutase (AHRD V3.3 *** A0A1U8EWU2_CAPAN)
Solyc02g021170	124.477	70.3706	139.702	133.842	88.0931	123.47	117.532	115.026	113.128	110.119	-1.02732	0.879934	0.964966	#N/A
Solyc02g021220	11.9262	9.46653	10.0651	5.9105	10.2851	9.04014	19.3019	10.9401	9.05284	11.8373	1.30758	0.196074	0.608142	Subtilisin-like protease (AHRD V3.3 *** A0A1J3JRH1_NOCCA)
Solyc02g021260	4.70237	4.13906	3.06744	28.4692	2.40433	14.7362	2.52423	2.94033	6.42084	4.02695	-1.59447	0.342934	0.741139	B3 domain-containing protein (AHRD V3.3 *-* A0A1Q3DFU3_CEPFO)
Solyc02g021340	39.251	27.6345	31.9506	20.8311	18.2044	21.1341	56.4506	29.2852	29.149	28.2403	-1.03218	0.893483	0.9692	Transport/golgi organization-like protein (DUF833) (AHRD V3.3 *** F4JTM0_ARATH)
Solyc02g021400	214.548	158.715	191.215	265.632	196.465	73.1318	170.423	101.215	203.933	125.47	-1.62534	0.0305994	0.298761	40S ribosomal protein S28 (AHRD V3.3 *** A0A2G3BI08_CAPCH)
Solyc02g021480	16.1459	16.9015	16.3779	21.6857	26.4837	25.0748	11.7623	22.5877	17.6443	20.4949	1.16156	0.619481	0.881792	Magnesium transporter CorA-like family protein (AHRD V3.3 *-* A0A2K3P294_TRIPR)
Solyc02g021520	25.1042	24.1812	28.1415	25.751	39.7873	36.6005	40.9634	24.2208	25.7538	34.67	1.34621	0.0394341	0.329744	Unknown protein
Solyc02g021590	60.5399	75.4739	44.4492	93.221	112.245	70.3865	45.6404	96.3641	65.9636	76.7769	1.16393	0.448286	0.801923	Protein male discoverer 2 (AHRD V3.3 *** A0A1J6KDE9_NICAT)
Solyc02g021600	46.5992	49.5014	45.574	50.3783	42.5137	45.4677	58.7092	67.0055	47.9722	52.5124	1.09464	0.45206	0.805142	F-box/kelch-repeat protein (AHRD V3.3 *** A0A2G2VW95_CAPBA)
Solyc02g021620	18.1776	26.3913	8.24081	14.5906	13.3126	27.595	21.2071	6.76316	15.4974	15.1507	-1.02289	0.941148	0.983531	Cation-chloride cotransporter.1
Solyc02g021640	200.116	169.698	219.396	205.147	147.624	161.587	190.616	197.993	197.726	173.218	-1.14148	0.187548	0.600399	BTB/POZ domain-containing protein (AHRD V3.3 *** A0A1U8FH79_CAPAN)
Solyc02g021650	177.548	108.028	149.386	192.361	139.615	202.168	158.884	136.422	153.222	157.272	1.02644	0.87715	0.964862	UV damaged DNA binding protein 1
Solyc02g021690	11.8746	11.791	9.8256	13.912	11.2682	8.83972	28.6643	18.9971	11.7619	15.2609	1.29748	0.322973	0.725541	#N/A
Solyc02g022840	39.6443	70.6318	166.882	230.632	213.132	89.3818	26.2449	131.965	101.889	90.126	-1.13052	0.805303	0.946301	#N/A
Solyc02g022850	48.21	50.1838	50.4455	52.4737	82.9235	105.553	21.3732	20.9445	50.3056	44.491	-1.13069	0.722385	0.918207	FAD-binding Berberine family protein (AHRD V3.3 *** A0A1P8ATP1_ARATH)
Solyc02g022890	95.9535	125.715	60.2151	125.274	152.819	207.548	138.408	105.298	97.6683	146.629	1.5013	0.0577848	0.38299	Fatty acid hydroxylase (AHRD V3.3 *-* A0A200Q3T8_9MAGN)
Solyc02g022900	6.88817	20.0915	7.62608	11.3553	18.4672	21.9246	18.5011	18.5218	10.4629	19.2998	1.84459	0.0615432	0.392991	Unknown protein
Solyc02g022920	13.7744	20.4552	18.0733	13.6608	25.9375	34.1627	16.8917	22.2202	16.2404	24.0146	1.47869	0.0416118	0.332417	ethylene-responsive nuclear protein
Solyc02g022930	9.52516	14.0747	9.35674	11.3965	12.2477	10.9135	15.3946	18.9554	10.9346	14.0534	1.28522	0.274951	0.691048	3-hydroxyisobutyrate dehydrogenase (AHRD V3.3 *** A0A1U8FBY0_CAPAN)
Solyc02g023950	165.798	148.441	118.238	132.548	121.599	107.921	116.642	165.573	140.141	126.174	-1.1107	0.387524	0.769163	Leucine-rich receptor-like protein kinase family protein (AHRD V3.3 *** A0A061G8R7_THECC)
Solyc02g023980	54.0549	66.6813	60.2022	58.1578	32.2916	47.1155	44.9219	77.0779	59.6026	47.9082	-1.2441	0.218828	0.634865	ATPase (AHRD V3.11 *** tr|A0A200Q5U6|A0A200Q5U6_9MAGN)
Solyc02g024000	44.0675	42.1357	38.3124	61.4755	41.1606	41.5618	71.5858	41.483	45.7301	47.4754	1.03816	0.805441	0.946301	WPP domain-associated protein (AHRD V3.11 *** tr|A0A2G2XDL8|A0A2G2XDL8_CAPBA)
Solyc02g024020	145.113	127.926	127.209	69.3926	134.132	128.685	81.8904	93.9355	113.142	107.345	-1.05401	0.762721	0.934235	Calcium-dependent ARF-type GTPase activating protein family (AHRD V3.3 *** A0A2U1Q799_ARTAN)
Solyc02g024070	74.0553	89.313	66.8333	74.5939	64.9644	60.1994	111.6	54.0046	75.7778	69.6772	-1.08755	0.626772	0.883977	Homeobox leucine-zipper protein (AHRD V3.3 *** A0A2U1QME9_ARTAN)
Solyc02g030080	92.476	92.9172	62.5957	60.8167	53.3831	46.2388	74.0491	92.855	75.6264	64.1851	-1.17825	0.344022	0.742371	WD repeat-containing protein 43-like (AHRD V3.11 *** tr|A0A2I4EEZ8|A0A2I4EEZ8_9ROSI)
Solyc02g030110	35.0793	42.2939	58.2665	59.3873	36.6274	37.156	41.4942	25.2944	47.6004	34.571	-1.37689	0.0583599	0.384643	Vacuolar protein sorting-associated protein 54, chloroplastic (AHRD V3.3 *** A0A1U8FS35_CAPAN)
Solyc02g030130	31.6797	46.7131	29.4026	30.8129	23.6299	29.9451	17.1868	23.5022	34.0279	23.1219	-1.47167	0.0736791	0.423055	Subtilisin-like protease (AHRD V3.3 *** A0A1J3H877_NOCCA)
Solyc02g030190	15.5605	8.13031	8.93932	3.06744	17.0963	3.10875	21.8603	9.94925	7.67454	10.3689	1.35108	0.585944	0.871845	Unknown protein
Solyc02g030200	74.8264	59.1098	59.5161	69.0772	87.2414	31.7472	92.7879	43.2106	65.3011	57.7268	-1.13121	0.655612	0.896433	Integrase-type DNA-binding superfamily protein (AHRD V3.3 *-* AT2G41710.3)
Solyc02g030210	11.0011	10.1114	7.24691	16.2444	7.28174	10.1574	9.80942	14.0458	10.6973	10.0474	-1.06469	0.784623	0.940193	AP2-like ethylene-responsive transcription factor (AHRD V3.11 *** tr|A0A2G3D2M5|A0A2G3D2M5_CAPCH)
Solyc02g030230	19.4762	10.8708	9.45035	11.5107	7.10932	11.8751	16.6709	12.5605	12.3191	11.5308	-1.06837	0.776294	0.937265	#N/A
Solyc02g030250	75.9495	112.464	105.338	80.0643	74.7973	76.3923	102.089	80.7693	92.1277	82.8496	-1.11199	0.414001	0.782878	#N/A
Solyc02g031730	122.812	119.482	321.35	257.961	216.886	186.036	204.752	200.822	186.753	201.821	1.08068	0.695825	0.910636	Histone-lysine N-methyltransferase ATXR2 (AHRD V3.3 *-* A0A2G2Z378_CAPAN)
Solyc02g031770	14.3275	10.3564	7.39886	12.3339	6.92859	8.91476	9.38021	10.747	10.7873	8.88309	-1.21436	0.350089	0.746012	ATP synthase mitochondrial F1 complex assembly factor 1-like (AHRD V3.11 *** tr|A0A2I4G3K4|A0A2I4G3K4_9ROSI)
Solyc02g031790	10.6795	7.57672	7.16712	15.3464	5.24634	8.77438	8.52989	6.13018	9.71283	7.00443	-1.38667	0.255987	0.673534	Receptor-like protein kinase (AHRD V3.11 *** tr|A0A2R6Q6W2|A0A2R6Q6W2_ACTCH)
Solyc02g031830	79.6292	100.171	67.5855	51.2832	65.2151	95.6275	72.5681	95.5642	72.5122	81.0948	1.11836	0.455048	0.806444	polyadenylate-binding protein 1-B-binding protein (AHRD V3.3 *** AT5G44860.2)
Solyc02g031900	75.2151	100.215	113.465	168.382	78.9651	67.7151	66.2984	118.465	109.547	80.5014	-1.3608	0.105743	0.482555	Protein kinase domain containing protein (AHRD V3.3 *-* A0A0U9HPK6_KLENI)
Solyc02g031970	165.639	168.341	178.166	173.016	129.787	112.374	170.525	137.567	171.224	136.003	-1.25897	0.0306497	0.298993	50S ribosomal protein L7/L12 (AHRD V3.3 *** A0A1U8GY39_CAPAN)
Solyc02g031980	9.50442	10.8402	9.60004	20.4166	10.1854	7.99797	8.1603	10.9891	11.9208	9.245	-1.28943	0.215198	0.630613	urease accessory protein D
Solyc02g032000	9.09503	5.37242	7.82999	5.95654	8.72446	4.79884	20.8231	10.1909	6.90927	9.70862	1.40516	0.276904	0.693366	Agamous-like MADS-box protein AGL.1
Solyc02g032100	69.8088	77.385	45.3474	40.5992	39.8284	58.0157	96.1105	73.7991	56.1577	63.6268	1.133	0.567751	0.862057	Zinc transporter protein (AHRD V3.3 *** A5BDR3_VITVI)
Solyc02g032300	11.4366	12.553	10.8214	9.19658	9.41041	18.417	10.4675	7.38328	10.933	10.758	-1.01627	0.931211	0.981289	Enhancer of polycomb-like protein (AHRD V3.3 *** A0A2G3D2K3_CAPCH)
Solyc02g032360	60.2783	57.1098	63.3988	37.8989	78.3534	77.4651	48.7563	75.3818	53.6284	68.7251	1.28151	0.244445	0.662326	#N/A
Solyc02g032410	183.715	86.1318	244.965	99.1318	207.548	159.798	192.715	217.548	140.009	193.104	1.37922	0.22416	0.640125	#N/A
Solyc02g032450	69.0896	22.6124	73.2195	55.5086	47.9872	71.7756	74.6982	65.3321	50.198	64.0302	1.27555	0.37111	0.758296	Nuclear pore complex protein (AHRD V3.3 *-* A0A200QTL2_9MAGN)
Solyc02g032480	65.7737	52.0164	36.279	63.3173	20.9699	10.2984	38.3	51.3674	52.9472	25.5307	-2.07386	0.0281654	0.289856	Nuclear pore complex protein NUP214 (AHRD V3.11 *-* tr|A0A2U1PQW9|A0A2U1PQW9_ARTAN)
Solyc02g032490	77.6096	57.7443	50.6047	61.1554	58.6548	52.8942	82.1261	68.3913	61.0257	64.6098	1.05873	0.724555	0.918758	Nuclear pore complex protein (AHRD V3.3 *-* A0A200QTL2_9MAGN)
Solyc02g032550	13.7335	33.4225	35.3294	51.299	20.5072	3.76674	9.4585	4.90684	30.2007	7.73791	-3.90295	0.010018	0.189621	Apyrase (AHRD V3.3 *** A0A2G2XFE6_CAPBA)
Solyc02g032580	10.9006	21.7834	5.85249	2.58864	17.0925	9.45023	3.25724	10.6353	7.74456	8.64892	1.11677	0.795201	0.943578	#N/A
Solyc02g032650	8.84557	26.51	7.37429	23.4938	21.1497	16.0111	26.2449	28.1358	14.1972	22.3618	1.57509	0.134644	0.532576	Disease resistance protein (TIR-NBS-LRR class) (AHRD V3.3 *** A0A2K3NUH8_TRIPR)
Solyc02g032660	131.436	162.164	98.8016	145.35	326.765	325.835	97.6948	129.099	132.27	191.428	1.44725	0.28726	0.699875	Protein DETOXIFICATION (AHRD V3.3 *** A0A328DGG9_9ASTE)
Solyc02g032690	12.794	5.18678	23.9345	27.7633	15.7	11.4204	23.4419	18.4856	14.4911	16.6956	1.15213	0.671307	0.902531	Ninja (AHRD V3.3 *-* A0A200QVW0_9MAGN)
Solyc02g032860	11.1024	13.0051	7.91048	7.2456	11.4519	13.0402	13.9344	14.6451	9.53789	13.2125	1.38527	0.0531335	0.369866	5'-adenylylsulfate reductase 1, chloroplastic (AHRD V3.3 *** A0A2G3D220_CAPCH)
Solyc02g032870	17.3246	21.8341	25.1145	16.1432	24.9859	21.2108	14.2749	18.4708	19.7892	19.3343	-1.02353	0.907973	0.973887	Endonuclease/exonuclease/phosphatase family protein (AHRD V3.11 *** tr|A0A2U1LJZ6|A0A2U1LJZ6_ARTAN)
Solyc02g032890	9.43235	3.69082	20.7479	19.5636	30.5329	28.3025	23.3147	5.22531	10.9029	18.0129	1.65212	0.302665	0.712223	#N/A
Solyc02g032910	3076.33	3554.65	3633.83	2984.19	3808.21	3851.48	2249.51	3661.03	3299.94	3315.2	1.00463	0.970407	0.991329	glycine rich protein precursor (AHRD V3.3 *-* NP_001233996.1)
Solyc02g032920	52.3821	57.8612	55.5828	54.382	36.4085	73.0386	87.3818	83.4837	55.0163	66.3658	1.20629	0.279803	0.694792	#N/A
Solyc02g032940	246.368	138.395	156.767	194.799	114.217	80.7389	369.752	185.663	179.633	158.622	-1.13246	0.643056	0.889808	Aspartic proteinase (AHRD V3.11 *** tr|A0A1U8FF23|A0A1U8FF23_CAPAN)
Solyc02g032950	9.86683	7.71673	6.15066	7.07913	21.5453	11.8165	8.46768	6.13013	7.58801	10.7218	1.413	0.148541	0.554897	WRKY transcription factor 16
Solyc02g032960	74.0636	73.5843	50.2293	59.3064	74.599	79.5075	51.1302	63.4129	63.4764	66.2215	1.04325	0.83059	0.954144	ATP-dependent zinc metalloprotease FtsH 2 (AHRD V3.11 *** tr|A0A1J3JSZ2|A0A1J3JSZ2_NOCCA)
Solyc02g036280	30.1636	38.0658	9.3229	29.3131	35.575	18.2611	24.4332	50.9573	23.6678	29.9892	1.26709	0.468663	0.812425	Pvr4 (AHRD V3.3 *-* A0A1D5AHY8_CAPAN)
Solyc02g036300	10.6432	11.0987	7.43233	7.86085	7.39561	9.99782	16.43	9.32405	9.11453	10.3164	1.13187	0.523624	0.838217	Malonyl-CoA decarboxylase family protein (AHRD V3.3 *-* A0A2U1QFC7_ARTAN)
Solyc02g036340	12.9892	11.3177	11.2405	9.62217	18.61	8.71342	19.2337	9.09553	11.2292	12.978	1.15573	0.521756	0.837448	#N/A
Solyc02g036350	77.7864	97.8575	145.51	342.435	100.406	266.707	387.799	606.692	139.554	281.736	2.01883	0.101711	0.474749	1-aminocyclopropane-1-carboxylate oxidase EF501822
Solyc02g036370	19.9765	18.6498	18.6582	30.011	29.6134	41.5574	35.6039	35.8734	21.3715	35.408	1.65678	0.00558624	0.145467	Protein REVEILLE 7-like (AHRD V3.3 *** A0A2G3A4J4_CAPAN)
Solyc02g036440	23.1146	18.4425	18.5483	10.1741	48.3127	22.5483	3.80049	11.1157	16.8413	14.6466	-1.14984	0.738883	0.92387	ALA-interacting subunit (AHRD V3.3 *** A0A1U8FRI2_CAPAN)
Solyc02g036450	56.0736	75.6927	65.4474	48.8133	86.2809	44.7214	65.0038	59.4048	60.6821	62.1295	1.02385	0.88984	0.968371	RAB GTPase (AHRD V3.3 *** A0A0P0YPT5_MARPO)
Solyc02g037490	35.9527	34.5786	37.1197	26.2297	37.6855	29.791	46.9752	33.2217	33.1692	36.3821	1.09687	0.540337	0.848549	AMP-dependent synthetase/ligase (AHRD V3.3 *** A0A200RCS7_9MAGN)
Solyc02g037500	11.5109	8.88465	8.6903	8.01487	12.1243	6.21812	3.99306	5.41773	9.18693	6.35492	-1.44564	0.205649	0.617608	Unknown protein
Solyc02g037530	263.796	188.921	228.86	270.588	169.601	266.176	217.099	239.151	235.699	220.03	-1.07121	0.601998	0.876381	auxin response factor 8B
Solyc02g037550	5.1686	5.77516	9.12725	7.06654	5.96133	9.47047	6.87588	6.85988	6.62401	7.18356	1.08447	0.679344	0.904064	Auxin efflux carrier (AHRD V3.3 *** A0A2U1MR93_ARTAN)
Solyc02g037590	7.97519	9.72815	10.0058	12.8107	17.4151	16.3993	16.0387	9.2299	9.98617	14.3394	1.43592	0.069647	0.414683	Unknown protein
Solyc02g038640	174.382	192.132	87.9651	131.215	100.715	249.923	46.1347	165.965	140.232	117.825	-1.19018	0.5575	0.857347	Replication protein A subunit (AHRD V3.3 *-* A0A176W2E5_MARPO)
Solyc02g038670	5.19449	6.98228	3.54039	3.71273	16.0863	3.76674	13.102	6.24193	4.67274	8.39014	1.79555	0.124881	0.518512	Tetratricopeptide repeat protein 5 (AHRD V3.3 *** A0A2U1N5G0_ARTAN)
Solyc02g038680	199.616	290.273	289.425	277.478	455.46	479.482	63.4494	227.727	261.181	237.01	-1.10198	0.871329	0.96386	Tetratricopeptide repeat protein 5 (AHRD V3.3 *** A0A2U1N5G0_ARTAN)
Solyc02g038690	75.6951	70.6318	99.2255	103.156	88.0209	93.3522	63.3618	40.1022	86.0096	67.5969	-1.27239	0.189376	0.601576	Histone H2B (AHRD V3.3 *** A0A078K3Z1_BRANA)
Solyc02g038740	18.3473	66.9775	48.9146	30.6451	33.9033	39.8936	16.9836	21.873	36.8405	26.6239	-1.38374	0.238448	0.655941	3-hydroxy-3-methylglutaryl coenzyme A reductase (AHRD V3.3 *** A0A2G2XB84_CAPBA)
Solyc02g038750	12.364	16.7034	13.7869	9.38801	11.8202	8.16319	9.64922	15.1733	12.7865	10.9022	-1.17284	0.384796	0.767212	WD repeat-containing protein 55-like (AHRD V3.3 *** A0A2K3P0N4_TRIPR)
Solyc02g038760	46.1721	43.1201	35.8021	26.0772	18.3057	41.7465	50.1267	40.3327	36.9238	35.256	-1.04731	0.825184	0.952729	AT-hook motif nuclear-localized protein 1 (AHRD V3.11 *** tr|A0A2G3A4Q2|A0A2G3A4Q2_CAPAN)
Solyc02g043810	43.4986	32.6008	37.8763	44.1227	30.8345	25.2307	21.688	15.4234	39.2359	22.5861	-1.73717	0.00728945	0.166403	ENTH/ANTH/VHS superfamily protein (AHRD V3.3 *** A0A2U1N0Z9_ARTAN)
Solyc02g043830	47.8929	36.1075	27.5079	37.9641	34.031	35.7804	50.5079	53.0368	36.6585	42.4976	1.15928	0.371793	0.758973	#N/A
Solyc02g043850	3.76674	3.91673	5.19449	14.8984	2.2939	20.7479	14.4992	4.40955	5.8129	7.42714	1.2777	0.587892	0.872474	#N/A
Solyc02g044040	11.9201	10.3454	6.96973	9.07849	10.6508	11.0459	9.08373	6.28884	9.39861	9.05428	-1.03803	0.889547	0.968343	Dihydropyrimidine dehydrogenase (AHRD V3.3 *-* Q6Z744_ORYSJ)
Solyc02g049070	43.8298	54.0743	33.8225	48.8929	21.4371	33.3411	54.7445	37.8387	44.4942	34.8823	-1.27555	0.215503	0.630735	ribosomal RNA small subunit methyltransferase J Chr5:2763914-2765431 FORWARD LENGTH=346 201606 (AHRD V3.11 *** AT5G08540.1)
Solyc02g049080	128.382	149.632	165.215	196.465	187.215	100.465	233.048	215.798	158.021	175.373	1.10981	0.595586	0.874533	Unknown protein
Solyc02g050140	31.1205	22.6346	15.147	11.9878	27.811	32.454	20.7304	37.5185	18.9113	28.9457	1.53061	0.14059	0.544012	#N/A
Solyc02g050180	11.4266	12.0634	7.99196	21.3306	13.9105	15.282	9.46574	13.1131	12.3811	12.7452	1.0294	0.891379	0.968541	DUF639 domain-containing protein (AHRD V3.11 *-* tr|A0A1Q3B335|A0A1Q3B335_CEPFO)
Solyc02g050200	57.852	59.8241	62.1694	43.6958	38.5377	35.9064	35.233	45.2669	55.3736	38.5431	-1.43667	0.00751502	0.167395	BREAST CANCER 2 like 2A (AHRD V3.3 *** A0A1P8B5L3_ARATH)
Solyc02g050210	15.7856	23.7623	16.9817	19.0955	16.01	14.5424	21.3695	19.6362	18.6752	17.6795	-1.05632	0.713844	0.916219	BREAST CANCER 2 like 2A (AHRD V3.3 *-* A0A1P8B5L3_ARATH)
Solyc02g050260	23.6751	28.6519	26.7827	37.1409	32.7061	17.2381	28.6587	42.8211	28.6608	28.8409	1.00628	0.975152	0.992669	Oligopeptidase B (AHRD V3.3 *** A0A0G2RJN8_CAPAN)
Solyc02g055330	213.704	199.164	141.433	139.285	120.532	140.905	177.415	127.346	170.165	139.959	-1.21582	0.119703	0.511712	#N/A
Solyc02g055420	70.5484	61.7984	53.7986	102.132	104.215	33.8392	67.7151	86.9651	69.9599	67.5064	-1.03634	0.888369	0.967949	#N/A
Solyc02g055440	48.5025	40.8469	36.0088	43.371	39.7553	37.3413	32.6566	24.0849	41.9404	32.8719	-1.27587	0.162211	0.571855	E3 ubiquitin-protein ligase%2C putative (DUF177) (AHRD V3.3 *** AT3G19800.2)
Solyc02g055450	21.761	16.6067	17.8485	10.0943	15.744	10.6932	24.4448	17.4803	15.9739	16.3772	1.02525	0.901476	0.9717	#N/A
Solyc02g055550	54.321	39.0077	30.1527	33.3099	30.7098	43.4502	28.1704	44.9435	38.1948	36.0522	-1.05943	0.791877	0.942977	Unknown protein
Solyc02g061650	7.73235	4.5036	7.62516	5.52766	10.832	8.02844	63.1694	32.2218	6.18964	20.5116	3.31385	0.00931011	0.183639	cyclinB2_1
Solyc02g061760	107.062	89.2758	47.0262	84.761	121.913	133.416	109.383	133.167	78.5645	124.066	1.57916	0.0194262	0.248754	Protein DETOXIFICATION (AHRD V3.3 *** A0A328DP91_9ASTE)
Solyc02g061790	24.1374	22.4395	29.4809	38.2652	10.829	18.5366	11.4661	24.6996	27.9584	15.4412	-1.81064	0.00949143	0.184843	Activated RNA polymerase II transcriptional coactivator p15 (AHRD V3.11 *** tr|A0A2G2XC29|A0A2G2XC29_CAPBA)
Solyc02g061800	24.0672	29.1982	30.8527	30.0516	61.1815	92.3294	23.3057	31.1086	28.4109	44.9858	1.5834	0.0926505	0.461697	Peptidyl-prolyl cis-trans isomerase-like protein (AHRD V3.3 *** W7U8L5_9STRA)
Solyc02g061810	90.6201	123.535	120.557	61.1833	83.3984	70.3426	83.4782	95.0701	95.3258	82.6035	-1.15402	0.420526	0.786744	S-acyltransferase (AHRD V3.3 *** A0A1U8FFD7_CAPAN)
Solyc02g061820	18.4262	18.845	23.8855	9.05081	19.8446	15.1752	19.8158	16.8118	16.5525	17.7972	1.0752	0.771139	0.936067	Ankyrin repeat (AHRD V3.3 *** A0A200QEF9_9MAGN)
Solyc02g061840	95.6368	66.4627	89.2555	109.2	61.4343	39.3275	102.142	82.7686	88.7188	67.2271	-1.31969	0.147742	0.553326	RNA-binding (RRM/RBD/RNP motifs) family protein (AHRD V3.3 *-* F4JNU2_ARATH)
Solyc02g061850	16.9241	22.7176	31.7987	32.8486	42.9305	28.1134	31.1764	26.0401	25.1738	31.462	1.24979	0.347611	0.744682	Phospholipase D (AHRD V3.3 *** K4B675_SOLLC)
Solyc02g061870	17.5192	41.9556	29.6761	15.4272	42.6622	63.2104	4.06412	24.0983	24.0852	22.6697	-1.06244	0.912314	0.97548	Senescence-specific cysteine protease SAG39 (AHRD V3.3 *-* A0A2G3CBW6_CAPCH)
Solyc02g061900	7.89473	16.0836	10.2971	9.05099	38.9991	29.1414	5.1501	17.0436	10.43	17.772	1.70393	0.158081	0.567369	Senescence-specific cysteine protease SAG39 (AHRD V3.3 *-* A0A2G3CBW6_CAPCH)
Solyc02g061910	89.5544	182.317	75.4815	125.471	241.012	273.555	82.7151	45.1347	111.513	125.255	1.12323	0.747802	0.928703	Senescence-specific cysteine protease SAG39 (AHRD V3.3 *-* A0A2G3CBW6_CAPCH)
Solyc02g061940	40.7447	42.6946	45.3333	53.7886	59.8161	40.5575	30.9006	38.1258	45.3824	41.1167	-1.10375	0.586178	0.871845	Myb/SANT-like domain (AHRD V3.11 *** tr|A0A200QA43|A0A200QA43_9MAGN)
Solyc02g061950	25.6522	12.8982	10.0334	19.7697	5.46209	31.4225	11.239	10.0429	16.0057	11.7977	-1.35668	0.394496	0.773026	Methyltransferase family-like protein (AHRD V3.3 *** A0A2K3PHE1_TRIPR)
Solyc02g061960	73.768	51.9742	56.8105	60.6069	67.053	51.9055	77.766	101.024	60.277	72.3121	1.19966	0.249291	0.668525	la-related protein 1C-like (AHRD V3.3 *** A0A2I4FDA4_9ROSI)
Solyc02g061980	72.0489	60.9339	55.0107	81.0629	70.2122	57.3093	94.1617	113.886	66.5179	81.0486	1.21845	0.2124	0.626206	la-related protein 1C-like (AHRD V3.3 *** A0A2I4FDA4_9ROSI)
Solyc02g062000	38.9065	37.7443	22.5363	22.3798	23.919	27.6591	20.6384	43.8721	29.3362	27.8203	-1.05449	0.825332	0.952729	1-phosphatidylinositol-3-phosphate 5-kinase FAB1A (AHRD V3.11 *** tr|A0A2I0X875|A0A2I0X875_9ASPA)
Solyc02g062020	130.869	184.324	138.745	109.83	151.547	124.991	92.9412	150.011	138.465	127.479	-1.08617	0.550599	0.854272	Rac-like GTP binding protein (AHRD V3.3 *** Q9S821_PHYPA)
Solyc02g062060	4.98356	9.3556	7.60323	7.26665	14.4988	15.2638	4.59589	8.30747	7.1242	9.58756	1.34577	0.251372	0.670463	Senescence-specific cysteine protease SAG39 (AHRD V3.3 *-* A0A2G3CBW6_CAPCH)
Solyc02g062110	50.6714	41.2073	46.0356	28.5017	26.2036	31.8629	34.0173	44.5417	40.6841	33.5373	-1.2131	0.244295	0.662302	Vacuolar fusion protein CCZ1-like protein (AHRD V3.3 *** A0A1J3IFZ9_NOCCA)
Solyc02g062140	15.7623	11.8834	7.94387	16.6657	6.01124	8.98188	6.2165	11.3017	12.5489	7.84793	-1.599	0.0566683	0.379934	Armadillo repeat only.1
Solyc02g062160	1068.82	608.492	821.651	1487.66	774.018	36.3477	1696.12	1218.7	944.252	491.071	-1.92284	0.324912	0.727021	Chaperone protein DnaJ (AHRD V3.3 *** A0A2G2XG76_CAPBA)
Solyc02g062170	21.9868	19.9025	17.7773	23.3473	13.0059	22.931	9.33939	16.8894	20.644	14.7273	-1.40174	0.105707	0.482555	Chalcone-flavanone isomerase family protein (AHRD V3.3 *-* AT5G66230.1)
Solyc02g062240	39.9403	30.6128	29.1707	27.3544	25.5004	31.2013	35.5435	18.4708	31.4284	26.8838	-1.16904	0.36388	0.753207	Small nuclear ribonucleoprotein Sm D3 (AHRD V3.3 *** A0A1U8FJ77_CAPAN)
Solyc02g062290	62.2184	50.1645	76.7642	38.7324	71.2298	66.3704	80.8861	92.5481	55.1934	77.1293	1.39744	0.0491981	0.360421	RNA binding protein (AHRD V3.3 *-* A0A2K3MUE2_TRIPR)
Solyc02g062350	23.5241	16.1677	22.8143	11.5795	21.3059	11.9807	18.6224	24.7207	17.8039	18.5148	1.03993	0.851292	0.95895	protein CHAPERONE-LIKE PROTEIN OF POR1, chloroplastic (AHRD V3.3 *** A0A2I4ERI8_9ROSI)
Solyc02g062360	91.8917	88.5226	79.7317	146.797	87.776	83.2344	126.922	119.76	98.7802	102.655	1.03923	0.791357	0.942567	#N/A
Solyc02g062370	37.044	32.7411	39.061	42.0265	46.8804	39.0865	36.9295	58.2692	37.5638	44.5613	1.18628	0.189718	0.602152	Zinc finger CCCH domain-containing protein 19 (AHRD V3.3 *** A0A2G2XGC4_CAPBA)
Solyc02g062380	15.4125	24.7478	21.9442	13.8453	20.3953	20.2475	17.6847	17.3257	18.4505	18.8602	1.02221	0.887903	0.967768	GATA transcription factor (AHRD V3.3 *** K4B6C7_SOLLC)
Solyc02g062410	34.6125	21.933	30.6263	24.6525	45.6384	70.9678	36.8199	35.4622	27.5152	45.3482	1.64812	0.0116311	0.202878	Protein BOBBER.1
Solyc02g062430	59.4082	69.4142	30.858	49.9899	88.5712	99.5974	48.9842	70.6451	50.2211	74.3309	1.48007	0.119858	0.511964	D-2-hydroxyglutarate dehydrogenase, mitochondrial (AHRD V3.3 *** A0A2G2XBI2_CAPBA)
Solyc02g062520	16.1951	12.76	28.7525	26.6366	21.0635	9.37111	19.3778	11.0815	19.9456	14.3485	-1.39008	0.193912	0.606644	Pseudouridine synthase (AHRD V3.3 *** A0A200QI62_9MAGN)
Solyc02g062530	35.8408	22.8228	24.6293	20.7184	17.8961	12.9429	26.8761	18.0602	25.4178	18.3113	-1.3881	0.0858641	0.44704	thiamine-phosphate synthase (AHRD V3.3 *-* AT5G49410.2)
Solyc02g062540	12.8192	12.2878	14.2672	9.57642	9.84454	9.22567	8.05215	9.16339	12.1121	9.04775	-1.33868	0.0521106	0.368046	Thioredoxin domain-containing protein (AHRD V3.3 *** A0A1Q3D5L0_CEPFO)
Solyc02g062550	13.2268	19.2392	18.3266	20.5514	16.1691	14.7603	7.47014	13.4008	17.5951	12.4325	-1.41525	0.0939907	0.463216	P-loop containing nucleoside triphosphate hydrolases superfamily protein (AHRD V3.3 *** A0A2U1NGS8_ARTAN)
Solyc02g062560	38.0481	24.2456	31.1797	8.12271	23.5199	23.1129	22.5462	23.1802	21.9854	23.0871	1.05011	0.88033	0.964966	Tobacco mosaic virus resistance-1
Solyc02g062570	12.6833	17.9907	16.6332	13.4568	19.9163	17.7664	13.2751	18.0951	15.0331	17.0746	1.1358	0.531093	0.843066	Phosphatidic acid phosphatase (AHRD V3.3 *** E5F729_9BRAS)
Solyc02g062580	99.6822	86.2027	88.8214	129.548	128.913	75.3728	44.8678	66.0277	99.7176	73.2475	-1.36138	0.153725	0.560479	Lipid phosphate phosphatase epsilon 2, chloroplastic (AHRD V3.3 *** A0A2G2XB00_CAPBA)
Solyc02g062610	80.6778	72.7627	46.4972	42.1534	80.6121	85.2551	108.879	79.9012	58.2412	87.9336	1.50982	0.0208419	0.258332	Alpha/beta-Hydrolases superfamily protein (AHRD V3.3 *** O23227_ARATH)
Solyc02g062640	24.4314	22.7946	17.0435	17.2531	23.6776	21.4522	16.047	21.726	20.1165	20.5138	1.01975	0.932605	0.981758	Phosphopantetheine adenylyltransferase (AHRD V3.3 *** A0A2G2WHT8_CAPBA)
Solyc02g062670	35.823	69.6915	38.6093	25.968	74.2196	67.983	18.1948	44.5327	39.7757	44.9662	1.13049	0.701733	0.911824	Tubby-like F-box protein (AHRD V3.3 *** A0A2G3D7T8_CAPCH)
Solyc02g062680	38.0004	23.3797	20.4209	17.3905	15.6699	21.9883	18.9931	23.4105	23.7003	19.7841	-1.19795	0.385111	0.767453	Anaphase-promoting complex subunit 10 (AHRD V3.3 *** A0A2G3D1X5_CAPCH)
Solyc02g062700	250.674	222.837	218.263	181.691	127.851	122.827	214.258	136.922	216.947	146.505	-1.48082	0.0133382	0.215494	ATPase family AAA domain-containing protein 3-like (AHRD V3.3 *** A0A2I4E883_9ROSI)
Solyc02g062740	110.367	149.685	128.971	175.418	106.444	112.254	113.992	156.179	139.042	120.769	-1.15131	0.314314	0.720135	cytosine-5 DNA methyltransferase5
Solyc02g062780	33.9046	53.2365	42.9589	18.162	27.8782	42.3017	35.1188	36.4799	34.4486	35.0594	1.01773	0.930749	0.981123	ATP-dependent DNA helicase DD.1
Solyc02g062790	4.4341	4.13906	8.02089	5.41773	12.3434	5.24172	22.5758	11.3217	5.31419	11.3401	2.13393	0.0108883	0.197091	Proline-rich receptor-like protein kinase PERK7 (AHRD V3.3 *** A0A2G3A4A7_CAPAN)
Solyc02g062800	43.3047	65.9341	63.514	47.413	52.2865	61.489	42.1485	52.3053	54.1506	51.5975	-1.04948	0.71183	0.915603	Ribosome biogenesis protein BMS1-like protein (AHRD V3.3 *-* A0A2G2W7A2_CAPBA)
Solyc02g062810	76.6318	123.557	59.4939	78.9651	84.1351	98.0243	66.2617	100.119	81.6669	86.0048	1.05312	0.751599	0.930791	Signal recognition particle subunit SRP68 (AHRD V3.3 *** A0A2G2X690_CAPBA)
Solyc02g062890	4.85829	8.50258	7.27837	8.68675	23.3142	10.6066	10.3745	13.4717	7.14877	13.6347	1.90728	0.0191187	0.247533	polyol monosaccharide transporter 5
Solyc02g062920	33.9398	31.9529	12.3698	16.2018	25.1806	40.0026	19.2878	37.1751	21.5917	29.1522	1.35016	0.234369	0.652703	U2 snRNP auxiliary factor large subunit (AHRD V3.3 *** A0A2G3AAC4_CAPAN)
Solyc02g062930	7.92147	8.9059	6.66915	5.05631	5.3553	5.21287	13.8959	7.042	6.98388	7.22955	1.03518	0.883417	0.966274	#N/A
Solyc02g062970	277.683	209.873	212.538	251.913	217.883	211.406	290.195	287.534	236.346	248.989	1.05349	0.60417	0.877596	Xaa-Pro aminopeptidase 2
Solyc02g063000	406.741	476.902	311.5	392.049	579.604	724.276	610.963	532.84	392.316	608.012	1.5498	0.000775674	0.0624806	Glycosyltransferase (AHRD V3.11 *** tr|A0A2I4ENI5|A0A2I4ENI5_9ROSI)
Solyc02g063020	10.5505	11.9776	9.49697	8.78228	8.10854	5.86735	6.09414	10.2879	10.1323	7.3902	-1.37105	0.0530767	0.369866	Major facilitator superfamily protein (AHRD V3.11 *** tr|A0A2U1P386|A0A2U1P386_ARTAN)
Solyc02g063060	37.3571	38.8115	52.2448	35.7096	38.1626	22.0073	25.5862	20.2542	40.5546	25.6851	-1.57892	0.0220572	0.264898	Zinc-finger domain of monoamine-oxidase A repressor .1
Solyc02g063100	3.95651	8.13031	14.8185	14.8984	13.0187	33.8392	4.40955	7.52189	9.17996	10.9945	1.19767	0.748311	0.929066	#N/A
Solyc02g063140	43.2155	52.0169	37.3992	33.5737	32.5735	39.8089	66.8372	51.6447	40.9884	45.9962	1.12218	0.474854	0.815306	3-ketoacyl-CoA synthase (AHRD V3.3 *** A0A2G3D1W0_CAPCH)
Solyc02g063160	12.5357	26.1843	16.7361	7.34264	14.9817	14.7362	15.3289	17.1484	14.1718	15.521	1.09521	0.739692	0.924543	Alpha/beta-Hydrolases superfamily protein (AHRD V3.11 *** tr|A0A1P8B9I4|A0A1P8B9I4_ARATH)
Solyc02g063180	54.4674	47.9323	24.7387	40.7683	39.8477	47.9007	47.4572	47.6074	40.2824	45.5701	1.13127	0.530661	0.842765	UDP-N-acetylenolpyruvoylglucosamine reductase (AHRD V3.3 *-* A0A200Q3E8_9MAGN)
Solyc02g063240	48.9664	39.075	27.9798	65.5655	27.6301	36.5199	88.717	53.2314	43.2842	46.7221	1.07942	0.765718	0.934953	Delta(7)-sterol-C5(6)-desaturase (AHRD V3.3 *** A0A1U8FPX0_CAPAN)
Solyc02g063270	288.657	265.617	151.342	175.665	289.888	226.929	324.068	204.82	212.481	257.059	1.20979	0.279448	0.694586	Protein DETOXIFICATION (AHRD V3.3 *** A0A328DLR5_9ASTE)
Solyc02g063320	14.625	19.4743	25.7187	22.875	32.4665	43.3484	33.3831	28.6902	20.2321	34.0735	1.68413	0.00764953	0.167502	#N/A
Solyc02g063330	19.2528	13.8303	9.85019	7.44666	11.3949	11.9632	18.773	20.3304	11.8218	15.1029	1.27755	0.346952	0.744119	Protein kinase superfamily protein (AHRD V3.3 *** A0A2U1NMG2_ARTAN)
Solyc02g063350	40.3482	72.1654	50.5096	35.9446	24.8382	26.5854	81.343	72.5137	47.9502	44.4248	-1.07935	0.796094	0.943654	Calcium-dependent protein kinase (AHRD V3.3 *-* CDPK_DAUCA)
Solyc02g063380	15.9293	18.8576	13.4424	15.1529	15.007	20.1791	9.4585	17.482	15.7277	14.959	-1.05139	0.767701	0.935516	Unknown protein
Solyc02g063390	11.654	11.4803	11.5202	9.86892	17.0035	20.3658	13.1365	15.0527	11.1055	16.1765	1.45661	0.0184067	0.243316	3-oxo-5-alpha-steroid 4-dehydrogenase (DUF1295) (AHRD V3.11 *** tr|O81042|O81042_ARATH)
Solyc02g063400	21.3059	33.137	25.8425	63.5401	72.2293	128.618	20.4241	6.6998	32.8132	33.578	1.02331	0.964367	0.989835	Cytochrome b561 and DOMON domain-containing protein (AHRD V3.11 *** tr|A0A200QEE6|A0A200QEE6_9MAGN)
Solyc02g063450	721.563	342.334	265.38	204.387	179.899	112.292	953.131	715.327	340.221	342.577	1.00692	0.987197	0.996029	Glycine-rich domain-containing protein 2 (AHRD V3.3 *** A0A2G3A574_CAPAN)
Solyc02g063460	29.1066	24.1751	15.7996	17.227	26.6089	22.6509	25.4364	23.7117	20.9196	24.5546	1.17376	0.323457	0.725752	S-adenosyl-L-methionine-dependent methyltransferases superfamily protein (AHRD V3.3 *** Q9XII4_ARATH)
Solyc02g063490	45.3014	37.8989	32.1903	45.1478	23.211	24.1374	60.6514	39.3411	39.7443	34.0031	-1.16884	0.526456	0.840413	Malate dehydrogenase (AHRD V3.3 *** A0A2G2XBH7_CAPBA)
Solyc02g063510	11.4896	21.6089	13.7093	9.84109	20.75	20.5639	7.80834	12.0187	13.5285	14.146	1.04565	0.853808	0.958981	hypothetical protein (AHRD V3.3 *-* AT5G67020.1)
Solyc02g063520	7.38673	8.7319	8.04076	9.81267	8.96652	6.46277	18.4055	5.57348	8.4462	8.7807	1.0396	0.871747	0.96386	Homeobox-leucine zipper protein HAT22 (AHRD V3.11 *** tr|A0A2G2XBJ3|A0A2G2XBJ3_CAPBA)
Solyc02g064550	31.0184	20.492	15.8421	24.1912	16.9606	21.8661	5.7711	27.8243	22.2161	15.6216	-1.42215	0.319083	0.723283	#N/A
Solyc02g064580	84.354	84.2296	67.7243	68.5516	26.4399	43.4529	79.3522	57.1375	75.785	47.7738	-1.58633	0.0367244	0.323436	Transmembrane protein (DUF2215) (AHRD V3.3 *** F4K567_ARATH)
Solyc02g064600	12.8942	11.7942	12.5265	10.1984	14.7629	15.7064	13.0323	8.71325	11.8061	12.7383	1.07896	0.655313	0.896368	#N/A
Solyc02g064610	18.845	4.76755	12.8349	9.94925	10.5432	5.50074	4.84012	10.6524	10.3495	7.39477	-1.39957	0.36735	0.755803	#N/A
Solyc02g064630	10.7166	9.43458	17.2827	40.179	10.1662	18.8424	15.1722	12.6549	16.2779	13.8484	-1.17543	0.583271	0.870737	Telomere repeat-binding factor.1
Solyc02g064650	21.5769	20.107	19.2786	19.6272	13.3541	8.65702	37.0823	23.0952	20.1288	17.7385	-1.13475	0.682046	0.904064	xyloglucan endo-transglycosylase B2
Solyc02g064680	167.295	166.523	123.65	134.419	86.3967	73.0235	133.055	96.6849	146.691	94.9155	-1.54549	0.00790889	0.171925	#N/A
Solyc02g064720	26.2857	46.2335	25.5817	29.0991	16.6335	34.9961	20.0981	16.2176	30.8405	20.8706	-1.4777	0.109194	0.490982	BTB/POZ domain-containing protein (AHRD V3.3 *** A0A2G2XBD2_CAPBA)
Solyc02g064730	446.248	373.703	386.238	390.265	411.181	413.587	524.178	616.063	398.18	484.09	1.21576	0.0526021	0.36843	DUF1909-domain-containing protein (AHRD V3.3 *** A0A1J7IYE1_9PEZI)
Solyc02g064740	12.9299	8.4562	22.6675	4.96953	5.92198	12.5416	9.30384	7.07753	10.5347	8.36259	-1.25974	0.485159	0.821861	Chaperone protein DnaJ (AHRD V3.3 *** A0A2G2XBH3_CAPBA)
Solyc02g064800	34.2537	31.3171	42.6993	31.2328	35.6636	42.8338	38.0168	31.6192	34.5844	36.8116	1.0644	0.771235	0.936067	WD40 repeat (AHRD V3.3 *** A0A200PS16_9MAGN)
Solyc02g064830	6.87701	4.64193	7.88323	5.1688	8.17338	6.7922	11.7426	6.02452	6.00548	7.91635	1.31819	0.233018	0.651369	Indole-3-acetic acid-amido synthetas 3-3
Solyc02g064960	578.052	550.898	511.784	505.765	277.805	480.52	548.327	438.427	535.819	423.25	-1.26596	0.0847435	0.444918	APETALA2b
Solyc02g064980	19.0688	41.4157	27.9758	31.0299	79.0382	90.4199	7.35635	19.3668	28.7748	31.7655	1.10393	0.848318	0.958315	MAP kinase kinase kinase
Solyc02g065040	7.90508	10.0789	9.79043	10.6909	8.10747	10.7703	13.3232	9.14278	9.55616	10.1555	1.06272	0.699787	0.911379	Unknown protein
Solyc02g065060	17.5604	27.2255	19.3271	35.1298	39.3762	20.0888	23.3147	18.4708	23.8692	24.1588	1.01213	0.951594	0.986861	Short-chain dehydrogenase/reductase SDR (AHRD V3.3 *** A0A200PU74_9MAGN)
Solyc02g065070	116.184	150.756	145.951	82.8316	93.0387	210.099	171.511	144.842	120.63	148.446	1.23059	0.237753	0.65538	CDPK-related protein kinase (AHRD V3.3 *** A0A2G3D8R0_CAPCH)
Solyc02g065080	39.7059	29.4765	24.8663	23.511	33.9901	39.6853	42.0595	22.869	28.761	33.75	1.17346	0.344612	0.742889	Phosphoglycerate mutase-like protein 4 (AHRD V3.11 *** tr|A0A1U8FJL4|A0A1U8FJL4_CAPAN)
Solyc02g065110	20.8389	15.0385	18.584	23.2236	32.4123	31.6521	17.8798	21.27	19.1773	24.9926	1.30324	0.148808	0.555014	MAP kinase kinase kinase 15
Solyc02g065170	154.787	135.545	142.127	134.339	135.008	100.333	90.2056	89.1467	141.473	102.161	-1.38481	0.0088141	0.180066	L-ascorbate oxidase-like protein (AHRD V3.3 *** A0A2G3D2Z5_CAPCH)
Solyc02g065180	13.7042	14.7665	9.58966	5.55857	18.6571	19.1168	20.1642	14.2454	10.1912	17.8907	1.75551	0.0243183	0.275451	Meiotically up-regulated protein (AHRD V3.3 *** F4K264_ARATH)
Solyc02g065240	13.2611	9.55859	8.6438	9.75612	6.99256	8.24578	11.1636	7.16031	10.1681	8.2395	-1.23406	0.182706	0.596345	Methyl esterase.1
Solyc02g065290	11.6194	12.2811	11.8382	14.7454	8.8294	14.736	11.2774	14.032	12.5629	11.9787	-1.04877	0.786627	0.941442	Dof zinc finger protein2
Solyc02g065350	159.76	193.582	131.927	185.671	120.686	88.299	154.309	153.343	165.903	126.013	-1.31655	0.0866778	0.448449	B3 domain-containing protein (AHRD V3.3 *** A0A1Q3D977_CEPFO)
Solyc02g065360	58.7291	52.4506	37.5634	75.7272	46.4726	75.0721	66.121	63.0087	54.407	61.7453	1.13488	0.499813	0.828029	Protein root UVB sensitive 4 (AHRD V3.3 *** A0A1U8FR98_CAPAN)
Solyc02g065370	78.5693	68.0112	56.858	63.6021	50.8807	62.454	79.1642	82.6865	66.3016	67.5335	1.01858	0.890639	0.968541	UDP-N-acetylmuramoyl-L-alanyl-D-glutamate-2%2C 6-diaminopimelate ligase (AHRD V3.3 *** AT4G37090.1)
Solyc02g065410	36.2026	41.35	40.3148	17.1177	30.4893	28.162	56.3875	47.2665	31.881	38.8944	1.21999	0.40249	0.777117	Pentatricopeptide repeat (AHRD V3.3 *** A0A200Q413_9MAGN)
Solyc02g065430	45.6303	60.1965	40.6881	54.1955	37.188	29.7064	46.7622	34.9166	49.6094	36.6475	-1.35369	0.101015	0.473462	HTH-type transcriptional regulator (AHRD V3.3 *** Q680G2_ARATH)
Solyc02g065490	131.215	66.5473	90.9658	81.9651	104.193	40.0021	125.366	108.911	89.8267	86.8546	-1.03422	0.887689	0.967768	BEL1-like homeodomain protein 4 (AHRD V3.3 *** A0A2G3D326_CAPCH)
Solyc02g065500	24.8031	13.8803	17.4168	5.40301	5.02054	8.47055	21.0814	17.1574	13.4161	11.1366	-1.20469	0.616937	0.881393	ribosome 60S biogenesis amino-terminal protein (AHRD V3.3 *** AT4G27010.1)
Solyc02g065510	21.4969	15.6213	14.2967	16.3744	17.5192	19.5284	32.1648	16.1778	16.7445	20.541	1.22673	0.25213	0.671081	Pentatricopeptide repeat-containing protein (AHRD V3.3 *** A0A2G3A5S6_CAPAN)
Solyc02g065530	6.89243	7.19346	12.4433	6.99725	5.75679	9.36053	7.21082	12.2793	8.10575	8.31112	1.02534	0.922688	0.979221	Hexosyltransferase (AHRD V3.11 *** tr|A0A2G2XBK6|A0A2G2XBK6_CAPBA)
Solyc02g065550	171.789	202.524	133.418	135.564	227.404	230.655	67.8141	96.2659	158.383	136.031	-1.16431	0.571735	0.864386	ACI19
Solyc02g065580	125.672	119.719	106.403	141.621	72.5517	78.8966	111.568	82.9368	122.707	85.3098	-1.43837	0.00601403	0.150377	Cytochrome b5.1
Solyc02g065590	9.12784	8.25181	22.587	12.5939	9.01042	7.56331	13.1207	9.43841	12.0986	9.58469	-1.26228	0.360314	0.75119	Alpha/Beta hydrolase fold protein (AHRD V3.3 *** A0A2U1Q9F9_ARTAN)
Solyc02g065610	4.18207	3.74846	7.34557	7.22508	11.5638	11.8566	8.24117	9.01289	5.37067	10.0457	1.87047	0.00432692	0.134776	Protein trichome birefringence-like 21 (AHRD V3.11 *** tr|A0A2G3A5R0|A0A2G3A5R0_CAPAN)
Solyc02g065620	49.8497	74.3777	46.1583	19.8172	54.2482	47.0659	41.9177	31.3526	42.9141	42.7997	-1.00267	0.991174	0.996869	BRCT domain-containing protein (AHRD V3.3 *** A0A1J3H3Y1_NOCCA)
Solyc02g065630	71.4639	60.1264	61.5267	63.3193	40.3992	64.573	46.6326	63.7375	63.9643	52.7688	-1.21216	0.19798	0.610997	Protein FLX-like 2 (AHRD V3.3 *** A0A2G3D383_CAPCH)
Solyc02g065660	54.8663	42.9587	80.1919	69.6436	62.1613	55.6706	50.8602	57.7482	60.2341	56.4632	-1.06678	0.666841	0.900457	WPP domain-interacting tail-anchored protein 2 (AHRD V3.3 *** A0A1J3JZ59_NOCCA)
Solyc02g065670	20.6553	17.2168	11.0798	15.2566	22.5501	5.93431	18.845	31.6849	15.6583	16.8129	1.07374	0.840188	0.956086	Glycosyltransferase (AHRD V3.3 *** A0A2I4F7C4_9ROSI)
Solyc02g065690	29.1064	34.7783	16.9388	17.0363	30.5748	30.9271	23.8856	26.7253	23.2481	27.8734	1.19895	0.341249	0.739951	Biogenesis of lysosome-related organelles complex.1
Solyc02g065700	68.2151	22.4395	19.3271	8.84997	63.9651	30.6995	50.4659	44.3028	22.6204	45.7748	2.0236	0.153462	0.560243	Alpha/beta-Hydrolases superfamily protein (AHRD V3.3 *** Q9LY90_ARATH)
Solyc02g065720	11.2099	8.18199	8.58237	11.7195	16.6535	16.3796	15.7498	11.6267	9.80041	14.9498	1.52542	0.0186658	0.244381	RING/U-box superfamily protein (AHRD V3.3 *** A0A2U1QNZ5_ARTAN)
Solyc02g065780	105.999	161.213	129.823	88.2835	97.7092	83.7822	112.873	87.1467	118.299	94.7288	-1.24882	0.138097	0.540379	Protein RALF-like 27 (AHRD V3.3 *** A0A2G3D352_CAPCH)
Solyc02g065790	9.42523	21.0934	12.2787	30.2667	19.2044	12.9821	38.212	22.5683	16.4869	21.5333	1.30609	0.350079	0.746012	Haloacid dehalogenase-like hydrolase (HAD) superfamily protein (AHRD V3.3 *-* A0A1I9LMI0_ARATH)
Solyc02g066800	25.4167	30.4376	24.3179	20.3849	10.5432	13.745	10.1792	16.1426	24.8852	12.4223	-2.00327	0.00139536	0.0850566	Unknown protein
Solyc02g066860	4.10783	8.52692	16.0098	7.8628	18.0804	9.43235	10.6598	5.66756	8.14877	10.075	1.23638	0.511327	0.83267	Ninja (AHRD V3.11 *-* tr|A0A200QVW0|A0A200QVW0_9MAGN)
Solyc02g066900	12.5357	4.40955	17.4393	14.8984	7.3992	11.7823	4.84012	17.6869	10.9472	9.2946	-1.1778	0.714124	0.916219	Ninja (AHRD V3.11 *-* tr|A0A200QVW0|A0A200QVW0_9MAGN)
Solyc02g066910	20.2223	20.8321	21.424	20.3883	29.9782	22.6232	35.1719	23.6681	20.7115	27.4113	1.32348	0.144479	0.548867	Nucleotide/sugar transporter family (AHRD V3.3 *** A0A1Y1INK6_KLENI)
Solyc02g066920	12.016	12.5877	8.71965	24.7967	10.044	8.83813	7.06722	20.4831	13.4478	10.647	-1.26305	0.385464	0.767708	Chlororespiratory reduction 7 (AHRD V3.3 *** A0A2U1NIM3_ARTAN)
Solyc02g066930	29.4618	21.7698	27.9297	21.7219	15.5784	21.2621	22.8409	18.9317	24.9758	19.454	-1.28384	0.117661	0.508619	RNA-binding protein (AHRD V3.3 *-* Q941H9_TOBAC)
Solyc02g066980	11.5085	14.2004	7.93527	6.84627	5.80574	7.66007	9.3736	7.06356	9.70697	7.3664	-1.31774	0.174913	0.587043	TPX2 (Targeting protein for Xklp2) protein family (AHRD V3.3 *** F4K9T9_ARATH)
Solyc02g067040	11.022	18.7002	16.7948	19.8068	17.8443	12.1546	12.8033	13.4609	16.1817	13.9046	-1.16376	0.429938	0.792036	Protein ENHANCED DISEASE RESISTANCE 2-like (AHRD V3.3 *** A0A1J3E5X3_NOCCA)
Solyc02g067060	27.8954	37.8501	35.7825	33.5003	69.2535	26.7236	53.2593	19.0979	33.5413	37.0407	1.10433	0.711443	0.915603	Hexosyltransferase (AHRD V3.3 *** A0A1U8FIH2_CAPAN)
Solyc02g067080	17.562	13.5275	7.2502	9.48168	11.5064	9.18201	22.8889	18.0252	11.3046	14.4493	1.27817	0.374679	0.759924	UDP-glucose 6-dehydrogenase (AHRD V3.11 *** tr|Q6IVK6|Q6IVK6_TOBAC)
Solyc02g067100	105.469	203.401	116.19	100.061	104.102	158.27	36.8557	81.8818	125.669	83.9725	-1.49655	0.192188	0.604716	TPX2 (Targeting protein for Xklp2) protein family (AHRD V3.3 *** F4K9T9_ARATH)
Solyc02g067150	16.5936	19.3846	22.4564	18.2613	11.4851	10.946	16.9	21.9764	19.0576	14.6997	-1.29646	0.228678	0.64648	glycine-rich protein Chr3:11051645-11052629 REVERSE LENGTH=294 201606 (AHRD V3.11 *-* AT3G29075.1)
Solyc02g067160	26.9443	33.9312	34.4237	18.3703	36.0054	35.9272	32.4507	27.0168	27.5747	32.6334	1.18346	0.288724	0.699885	SPX domain-containing protein 4 (AHRD V3.3 *** A0A1U8FRG4_CAPAN)
Solyc02g067170	9.61263	13.1991	14.0474	5.50712	16.0863	4.40955	6.75775	29.8638	9.95353	10.9383	1.09894	0.812635	0.949252	#N/A
Solyc02g067200	22.3666	19.7337	9.26818	6.301	9.32317	12.522	25.8699	40.2168	12.6708	18.6685	1.47335	0.280419	0.695362	Pentatricopeptide repeat (AHRD V3.3 *** A0A200QP33_9MAGN)
Solyc02g067210	20.6647	41.272	60.9651	54.9647	16.8973	40.5574	37.5376	38.0656	41.1162	31.4573	-1.30705	0.374983	0.760007	KH domain-containing protein (AHRD V3.3 *** A0A1J3DQI6_NOCCA)
Solyc02g067230	54.9464	52.0638	41.4384	62.8229	87.6511	46.9932	76.6699	70.5525	52.2395	68.7041	1.31517	0.100989	0.473462	Dof zinc finger protein3
Solyc02g067250	22.2684	15.5955	12.9068	13.4654	22.33	15.4972	17.6716	22.3688	15.6741	19.2316	1.22697	0.19361	0.606644	Ribosomal protein L34e superfamily protein (AHRD V3.3 *** A0A2U1Q180_ARTAN)
Solyc02g067290	35.7828	37.3083	28.427	79.0943	22.6375	25.4214	15.2641	63.7486	41.6236	27.3554	-1.52159	0.204211	0.617008	Structural maintenance of chromosomes protein (AHRD V3.3 *-* A0A328DN75_9ASTE)
Solyc02g067340	16.9926	17.923	15.6998	7.69575	13.2722	11.0913	10.8466	9.39444	13.8501	11.0668	-1.2515	0.24442	0.662326	Transcription factor (AHRD V3.11 *** tr|Q40175|Q40175_SOLLC)
Solyc02g067370	298.795	226.839	247.776	268.954	197.898	191.269	265.216	289.253	259.243	232.135	-1.11678	0.310169	0.717788	Nucleosome assembly protein family (AHRD V3.3 *** A9RDK1_PHYPA)
Solyc02g067420	27.264	29.1671	31.9858	47.7412	28.1474	21.5022	29.8948	43.3803	33.1958	29.7648	-1.11527	0.536853	0.845779	Ubiquitin-conjugating enzyme (AHRD V3.3 *** Q5ZFS2_PLAMJ)
Solyc02g067460	271.297	275.243	280.226	233.048	159.832	181.837	195.623	189.74	264.258	181.23	-1.45814	0.000252411	0.0374531	Mitochondrial outer membrane protein porin (AHRD V3.3 *** A0A2K3KY08_TRIPR)
Solyc02g067470	35.7814	61.2097	46.3838	41.4202	53.7986	68.2098	35.5192	55.7152	45.2912	51.9115	1.14617	0.490413	0.823587	Hypersensitive-induced response protein (AHRD V3.3 *** A6YGE4_CARPA)
Solyc02g067480	12.4501	21.6595	22.6164	6.79129	9.7504	5.86578	9.02297	19.8705	14.2659	10.063	-1.41766	0.247617	0.666444	FAD/NAD(P)-binding oxidoreductase family protein (AHRD V3.3 *** A0A2U1MZ38_ARTAN),Pfam:PF03486
Solyc02g067490	14.1019	8.09591	20.4796	20.5055	13.0572	10.8369	15.775	20.0141	14.7973	14.5383	-1.01781	0.941485	0.983531	Actin cross-linking protein (DUF569) (AHRD V3.3 *** Q9XIF7_ARATH)
Solyc02g067510	11.9712	22.6782	12.6173	9.48445	34.9491	23.2254	9.3203	6.41455	13.4255	14.8422	1.10552	0.769257	0.935678	Actin cross-linking protein, putative (DUF569) (AHRD V3.3 *** Q8GXC9_ARATH)
Solyc02g067520	7.37691	3.69082	26.0176	3.95651	2.2939	5.19449	11.8546	5.52441	7.27603	5.28534	-1.37664	0.497614	0.826675	#N/A
Solyc02g067530	63.3155	60.7878	38.4966	48.4257	14.5955	40.5574	59.0485	40.5701	51.7555	34.5085	-1.49979	0.125181	0.519184	Oxoglutarate/iron-dependent oxygenase (AHRD V3.11 *** tr|A0A2U1MYZ7|A0A2U1MYZ7_ARTAN)
Solyc02g067540	73.2151	98.2151	111.965	134.048	128.048	31.7681	54.7986	91.7984	101.925	67.2578	-1.51544	0.286809	0.699875	Methyltransferase (AHRD V3.3 *** A0A2U1QFS7_ARTAN),Pfam:PF03602
Solyc02g067550	13.414	12.6446	14.5942	21.8059	34.0387	8.43151	7.55691	24.0698	15.2425	15.1156	-1.0084	0.98204	0.994802	CLAVATA3/ESR (CLE)-related protein 25 (AHRD V3.11 *** XP_010317099.1)
Solyc02g067560	45.1465	59.4838	51.94	58.6877	42.5198	40.7793	31.6697	38.7709	53.4894	38.1984	-1.40031	0.021057	0.259802	Inactive receptor kinase (AHRD V3.3 *** A0A2R6P9E5_ACTCH)
Solyc02g067570	115.95	103.527	60.6925	56.9332	62.3783	55.437	103.875	114.029	80.252	79.9999	-1.00315	0.988882	0.996667	Paired amphipathic helix protein Sin3-like.1
Solyc02g067580	149.971	161.613	147.02	146.286	106.276	112.965	102.85	124.336	151.1	111.313	-1.35744	0.00107591	0.0726953	B12D protein (AHRD V3.3 *** Q9XHD5_IPOBA)
Solyc02g067680	6.19741	7.05725	12.3084	7.99135	10.5275	9.58646	7.48432	6.87633	8.09872	8.48933	1.04823	0.779167	0.938319	RING/U-box superfamily protein (AHRD V3.3 *** A0A2U1N3Q0_ARTAN)
Solyc02g067690	23.3981	12.3911	16.0098	2.65469	40.8907	6.06037	4.04459	18.9284	10.5359	11.7362	1.11392	0.874735	0.964377	Glycosyltransferase (AHRD V3.3 *** A0A2U1M9M1_ARTAN)
Solyc02g067740	73.4002	113.826	81.6538	113.79	74.4218	80.0223	59.9373	101.065	93.8653	77.5001	-1.21116	0.188201	0.600465	beta-galactosidase (AHRD V3.3 *** AT3G27930.1)
Solyc02g067770	22.1091	3.24789	21.5594	52.7988	23.7253	7.8628	18.845	5.52441	16.9086	11.805	-1.43232	0.558165	0.857785	Cysteine-rich receptor-like protein kinase 2 (AHRD V3.3 *-* A0A2I0VVQ8_9ASPA)
Solyc02g067830	20.6769	52.0972	37.31	27.8524	70.7935	71.4338	13.1645	38.5504	32.5272	40.0251	1.23051	0.554918	0.856296	Protein kinase G11A (AHRD V3.3 *** A0A2G3A680_CAPAN)
Solyc02g067890	48.721	31.486	44.6132	51.6562	46.7355	38.9078	33.663	49.0839	43.3616	41.6336	-1.0415	0.842762	0.957024	S-adenosyl-L-methionine-dependent methyltransferases superfamily protein (AHRD V3.3 *** A0A2U1MED4_ARTAN)
Solyc02g067900	66.9047	64.5131	44.8444	54.8911	87.4158	48.6434	46.9332	88.8869	57.0924	64.8982	1.13672	0.472035	0.813724	Bromodomain testis-specific protein (AHRD V3.3 *** Q45GG8_ARATH)
Solyc02g067920	168.563	170.144	131.893	189.642	105.298	192.142	153.786	152.056	163.657	147.483	-1.10967	0.405542	0.778476	Alpha/beta-Hydrolases superfamily protein (AHRD V3.3 *** Q9LY90_ARATH)
Solyc02g067930	33.0558	53.9316	41.9701	17.4065	64.8484	37.3825	24.3258	35.7687	33.782	38.1096	1.1281	0.618534	0.881792	Glycerol-3-phosphate dehydrogenase [NAD(+)] (AHRD V3.3 *** A0A1U8FRT5_CAPAN)
Solyc02g067950	32.9745	39.0961	32.4903	33.9241	14.6254	58.0641	46.3412	37.835	34.5258	34.9316	1.01175	0.969458	0.991099	TPX2 (Targeting protein for Xklp2) protein family (AHRD V3.3 *-* F4J761_ARATH)
Solyc02g067970	137.47	165.769	151.215	88.0477	370.042	329.398	55.2398	108.822	131.979	164.526	1.24661	0.59249	0.873691	Zinc finger (C3HC4-type RING finger) family protein (AHRD V3.11 *-* tr|F4IWG7|F4IWG7_ARATH)
Solyc02g067980	103.362	133.117	108.558	70.3168	244.11	273.268	51.8166	99.1093	101.235	136.047	1.34388	0.404814	0.77783	Serine/threonine protein phosphatase 2A regulatory subunit (AHRD V3.3 *** A0A1U8FK60_CAPAN)
Solyc02g068000	9.5225	9.03301	6.42073	8.02092	14.2448	8.9274	16.2067	16.7417	8.15827	13.6292	1.67059	0.00722381	0.165575	F-box protein (AHRD V3.3 *** A0A1J3ESG6_NOCCA)
Solyc02g068030	28.9598	24.2023	24.5171	34.9879	36.4814	38.8233	42.5078	59.5797	27.8458	43.5194	1.56287	0.020892	0.258332	#N/A
Solyc02g068050	19.4518	12.5003	15.721	29.6549	13.8022	16.8329	7.09102	18.4227	18.3491	13.199	-1.39018	0.219421	0.635443	Rubisco methyltransferase family protein (AHRD V3.3 *** Q8VZB5_ARATH)
Solyc02g068060	26.0552	31.8146	29.7499	30.0668	23.2356	28.0912	34.2531	20.9188	29.3443	26.1511	-1.1221	0.437398	0.795057	Protein kinase domain (AHRD V3.3 *** A0A200QYA9_9MAGN)
Solyc02g068070	114.842	149.26	121.758	156.826	158.742	144.92	118.565	132.225	134.505	137.808	1.02455	0.831897	0.954144	Lipase (AHRD V3.3 *** A0A1U8FRV6_CAPAN)
Solyc02g068080	57.3263	40.8457	24.7333	23.5213	22.2431	50.5936	61.9747	60.5865	34.1634	45.3388	1.32712	0.298326	0.707829	Chloride channel protein (AHRD V3.3 *** K4B7E0_SOLLC)
Solyc02g068090	37.0059	25.7929	25.2135	28.2554	28.1164	21.8603	50.2985	22.7647	28.7161	28.964	1.00863	0.962826	0.98896	30S ribosomal protein S.1
Solyc02g068120	22.3337	32.4013	10.9521	53.3364	8.12311	20.2652	11.549	21.3201	25.4983	14.189	-1.79704	0.0967138	0.46903	DCD (Development and Cell Death) domain protein (AHRD V3.3 *-* A0A2U1P2J5_ARTAN)
Solyc02g068140	17.7246	16.7253	17.7478	13.4547	11.5145	15.9336	13.2021	17.0345	16.3114	14.2522	-1.14448	0.387617	0.769163	Major facilitator superfamily protein (AHRD V3.3 *** A0A2U1PZJ0_ARTAN)
Solyc02g068150	31.856	58.1393	52.9212	26.9792	24.4816	29.6418	38.1463	30.3547	40.3255	30.2765	-1.33191	0.15489	0.562444	Nuclear transport factor 2 (AHRD V3.3 *** A0A2G2XD55_CAPBA)
Solyc02g068180	15.3274	17.9015	17.6921	7.09215	18.5609	18.9648	20.6266	24.9393	13.6216	20.6284	1.51438	0.116621	0.506599	ABC transporter ATP-binding protein (AHRD V3.3 *** A0A347ZBK6_LACPN)
Solyc02g068190	71.9637	117.857	90.6455	96.8696	192.181	190.22	59.114	108.991	92.8968	123.883	1.33356	0.271757	0.687131	RNA helicase DEAD6
Solyc02g068200	19.674	15.9585	16.6226	23.0444	15.2115	14.4262	20.3951	15.1854	18.6225	16.1461	-1.15337	0.323299	0.725541	TCP transcription factor 18
Solyc02g068280	21.4494	31.4169	30.2983	29.171	16.4733	35.2205	10.1463	27.8026	27.7803	20.1137	-1.38116	0.35685	0.749525	subtilisin-like protein
Solyc02g068360	65.6186	86.0951	51.8961	36.712	58.435	53.0555	58.2284	48.7734	57.2779	54.4729	-1.05149	0.770459	0.935753	Tafazzin family protein (AHRD V3.3 *** A0A1U8FTW9_CAPAN)
Solyc02g068370	61.3465	49.1675	36.3776	55.3846	57.773	40.857	64.2257	62.8839	49.6504	55.5661	1.11915	0.437601	0.795103	C-type lectin receptor-like tyrosine-protein kinase (AHRD V3.3 *** A0A2G3D3S0_CAPCH)
Solyc02g068380	44.0984	28.5194	25.4491	26.2194	60.1459	30.9505	48.9064	33.88	30.2667	41.9079	1.38462	0.162177	0.571855	Allantoate deiminase/N-carbamoyl-L-amino-acid hydrolase (AHRD V3.3 *** A0A316ELX8_9BURK)
Solyc02g068420	411.604	356.056	338.562	404.896	438.264	474.517	608.806	568.942	376.483	518.065	1.37607	0.00393805	0.130616	Ribosome biogenesis protein NOP53 (AHRD V3.3 *** A0A200QRU3_9MAGN)
Solyc02g068430	113.382	89.5648	51.7712	42.5547	74.4651	103.798	83.0256	145.991	68.7748	98.3832	1.43051	0.129232	0.527451	Choline-phosphate cytidylyltransferase (AHRD V3.3 *** A0A2I0V8H3_9ASPA)
Solyc02g068440	33.7558	48.0497	88.7151	44.0528	21.4809	14.7362	86.0484	73.7151	50.1768	37.643	-1.33296	0.441756	0.79873	RNA binding protein (AHRD V3.3 *-* B6U487_MAIZE)
Solyc02g068480	17.4154	15.7055	31.9582	52.7824	27.9538	21.5685	16.9	27.9534	26.0624	23.1018	-1.12815	0.666424	0.900354	U4/U6.U5 tri-snRNP-associated protein 2 (AHRD V3.3 *** A0A2G2XD80_CAPBA)
Solyc02g068490	27.8315	24.1769	17.0182	32.2842	36.0705	29.0078	26.448	31.62	24.6581	30.5848	1.24035	0.158964	0.568506	Copper-transporting ATPase RA.1
Solyc02g068650	26.2052	23.9101	18.4459	21.5694	13.4081	19.5928	30.286	24.1129	22.3448	20.9285	-1.06767	0.716698	0.917053	tRNA (guanine-N(7)-)-methyltransferase (AHRD V3.3 *** A0A2G3D3W0_CAPCH),Pfam:PF02390
Solyc02g068720	19.1641	20.6066	34.9362	18.1382	18.5727	30.1834	32.3794	20.5208	22.3661	24.7045	1.10455	0.595155	0.874533	Protein NA.1
Solyc02g068730	80.045	56.7418	73.6404	81.9802	58.6175	40.9851	71.0476	76.0654	72.3629	60.0271	-1.2055	0.209018	0.622088	60 kDa chaperonin (AHRD V3.3 *** B2IXD2_NOSP7)
Solyc02g068760	32.4578	38.6631	34.334	25.6368	12.9082	15.7958	15.6276	11.4244	32.4191	13.8128	-2.34703	0.000739801	0.0604546	Pentatricopeptide repeat-containing protein (AHRD V3.3 *** A0A2G3A6F7_CAPAN)
Solyc02g068780	44.4292	38.7098	30.3818	37.9501	31.3127	29.8434	46.0102	41.3709	37.5257	36.5199	-1.02754	0.851294	0.95895	Unknown protein
Solyc02g068790	11.1911	6.25694	4.24554	8.46386	11.289	5.18772	3.79685	6.97722	7.08246	6.27603	-1.12849	0.744972	0.927269	Alpha 1,4-glycosyltransferase family protein (AHRD V3.3 *** A0A2U1LES8_ARTAN)
Solyc02g068800	24.1374	32.5895	51.299	25.5209	4.12508	113.882	4.84012	32.5895	31.8561	16.4989	-1.9308	0.33296	0.732542	#N/A
Solyc02g068860	11.9355	13.3054	9.48974	7.78272	9.36662	7.19528	10.7497	13.7771	10.4067	9.99532	-1.04116	0.80615	0.94649	#N/A
Solyc02g068890	44.6361	32.5895	35.9884	44.0528	7.3992	11.7823	26.2449	19.8079	38.9695	14.5906	-2.67086	0.019538	0.249163	Pentatricopeptide repeat-containing protein (AHRD V3.3 *** A0A2G3A6D5_CAPAN)
Solyc02g068900	28.9376	26.5717	26.7105	33.2744	28.6534	21.4224	23.2172	48.3089	28.752	28.8052	1.00185	0.991833	0.996961	Glutathione S-transferase (AHRD V3.3 *** A0A200QN08_9MAGN)
Solyc02g068910	52.9424	49.9667	58.0004	61.627	23.8448	58.8397	34.0099	61.5979	55.4526	41.4055	-1.33925	0.141917	0.545546	Trypsin family protein (AHRD V3.3 *** A0A2U1MFG3_ARTAN)
Solyc02g068920	63.2733	50.3077	36.7277	12.2123	18.2051	46.9421	33.9434	58.8199	34.567	36.1417	1.04556	0.892968	0.969108	lecithine cholesterol acyltransferase
Solyc02g068990	25.5524	16.2493	19.1919	22.7659	25.1867	19.9309	15.166	21.6168	20.638	20.1414	-1.02465	0.894558	0.969462	Unknown protein
Solyc02g069010	14.577	29.5781	11.7894	13.2457	21.8445	28.8059	33.5334	20.9841	16.1084	25.7957	1.60139	0.0357265	0.321406	Inositol-1-monophosphatase (AHRD V3.3 *** A0A1U8FS39_CAPAN)
Solyc02g069070	81.3189	77.6281	79.786	82.9128	58.0487	53.7242	56.8519	57.3039	80.3877	56.4577	-1.42386	0.000731216	0.0601892	Ribonuclease H2 subunit C-like protein (AHRD V3.3 *** F4IVV8_ARATH)
Solyc02g069080	12.7393	7.31745	18.5483	11.3489	5.86586	5.03455	8.00808	4.92469	11.8356	5.84184	-2.02601	0.00485302	0.13755	Exocyst complex component EXO84C (AHRD V3.11 *** tr|A0A1U8FJ63|A0A1U8FJ63_CAPAN)
Solyc02g069090	403.316	322.218	251.997	266.592	255.873	290.428	387.644	336.6	305.675	313.8	1.02658	0.818049	0.951145	Cathepsin B-like cysteine proteinase (AHRD V3.11 *** tr|Q40413|Q40413_NICRU)
Solyc02g069110	90.7878	60.9259	60.7365	38.7931	109.335	77.4626	104.737	63.9643	60.084	86.7905	1.44449	0.0508162	0.364307	Cathepsin B-like cysteine proteinase (AHRD V3.11 *** tr|Q40413|Q40413_NICRU)
Solyc02g069120	21.1911	39.5115	48.5338	25.7314	34.5324	14.6066	16.2884	24.0362	31.9776	21.0804	-1.51693	0.08247	0.440388	zinc finger protein ZPR1-like (AHRD V3.3 *** A0A2I4F7X7_9ROSI)
Solyc02g069130	7.89896	14.7094	9.02535	10.1845	11.3245	14.241	8.95657	8.10534	10.1658	10.402	1.02324	0.90559	0.972788	Peptidylprolyl isomerase (AHRD V3.3 *** A0A2G2XYU6_CAPAN)
Solyc02g069150	83.3127	103.113	70.1588	83.3818	78.1258	101.238	90.6238	109.333	84.1965	94.0878	1.11748	0.426635	0.790837	Vesicle-associated membrane protein (AHRD V3.3 *** A0A1U8H291_CAPAN)
Solyc02g069160	68.7805	61.2252	26.1622	38.6736	52.5577	54.6238	38.7445	36.193	45.433	44.7933	-1.01428	0.946986	0.985159	RNA-binding protein (AHRD V3.3 *-* G2X1T0_VERDV)
Solyc02g069170	22.4071	20.6657	20.7998	22.4514	15.3273	17.6013	19.3798	11.6792	21.5643	15.7197	-1.3718	0.0415392	0.332417	Transcription initiation factor TFIID subunit 8 (AHRD V3.3 *** A0A1J3F703_NOCCA)
Solyc02g069210	13.8835	11.4974	8.88665	10.9598	15.804	8.78854	6.53144	9.77761	11.1663	9.70468	-1.15061	0.478562	0.817483	Zinc transporter protein (AHRD V3.3 *** A5BDR3_VITVI)
Solyc02g069230	94.1946	116.683	95.9548	109.937	133.229	100.518	132.608	121.944	103.767	121.309	1.16905	0.100246	0.473366	RBR-type E3 ubiquitin transferase (AHRD V3.3 *** A0A1U8FJ78_CAPAN)
Solyc02g069290	56.5095	56.8018	61.491	98.8765	56.5876	44.3411	97.1876	59.7328	66.4656	61.7786	-1.07587	0.67838	0.904064	RING-type E3 ubiquitin transferase (AHRD V3.3 *-* A0A218W8P0_PUNGR)
Solyc02g069310	25.375	37.6037	40.938	32.3563	19.2507	27.3243	12.7978	17.3176	33.5297	18.478	-1.81458	0.00562211	0.145748	NIM1-like protein 1
Solyc02g069320	29.1324	20.2649	18.9425	26.5665	25.4875	29.5426	22.3466	28.0336	23.3466	26.2069	1.12252	0.462798	0.810778	Mitochondrial transcription termination factor family protein (AHRD V3.3 *** A0A178V165_ARATH)
Solyc02g069340	78.0918	92.1365	67.8091	75.9795	55.5208	63.6822	114.518	104.749	78.0289	80.7001	1.03423	0.828561	0.954119	RNA 3'-terminal phosphate cyclase (AHRD V3.3 *** A0A200PQ43_9MAGN)
Solyc02g069350	14.8984	15.6407	8.65702	12.3353	20.5072	10.9598	11.8546	7.52189	12.5597	11.8982	-1.0556	0.862017	0.961595	TRAM, LA.1
Solyc02g069380	13.3623	25.4274	15.1264	46.3073	21.2242	29.1431	17.6796	33.195	22.0873	24.5458	1.11131	0.703578	0.912718	Membrane fusion protein Us.1
Solyc02g069410	21.6332	14.1273	4.33583	6.6081	8.84759	14.3834	7.08251	13.8158	9.67347	10.5636	1.09202	0.792786	0.943332	Haloacid dehalogenase-like hydrolase domain-containing protein (AHRD V3.3 *** A0A1J3HBG0_NOCCA)
Solyc02g069470	342.046	488.635	472.742	344.974	390.403	323.617	216.215	254.132	406.322	288.651	-1.40766	0.020432	0.255073	#N/A
Solyc02g069560	7.6895	6.88698	10.7893	10.4247	8.59253	7.72423	14.9919	10.3204	8.78509	10.0666	1.14587	0.612214	0.879526	Protein CHUP1, chloroplastic (AHRD V3.3 *** A0A2G3D453_CAPCH)
Solyc02g069570	11.9473	15.0798	28.7553	44.3841	15.1145	10.6367	34.6118	13.2654	21.8979	16.483	-1.32852	0.348767	0.745318	Pentatricopeptide repeat-containing protein, chloroplastic (AHRD V3.3 *** A0A1U8FUD9_CAPAN)
Solyc02g069580	116.349	173.537	221.201	170.669	114.467	129.753	49.0715	156.649	166.159	103.369	-1.60744	0.0786537	0.433095	UDP-glucose 4-epimerase (AHRD V3.3 *** A0A1Y1ITM0_KLENI)
Solyc02g069620	28.9321	31.97	16.8684	40.7171	16.5819	45.9208	27.2916	32.3674	28.2321	28.6382	1.01438	0.959037	0.988055	Ribose 5-phosphate isomerase A (AHRD V3.3 *** A0A1Y1I8P0_KLENI)
Solyc02g069630	52.5221	44.8485	46.5117	46.9037	18.4386	34.3669	45.3289	49.4681	47.6118	34.5257	-1.37903	0.183933	0.598274	Subtilisin-like protease (AHRD V3.3 *** A0A1J3H877_NOCCA)
Solyc02g069650	90.1058	113.653	105.425	81.7563	126.792	115.596	118.203	111.521	96.9281	117.898	1.21634	0.0944683	0.464191	Unknown protein
Solyc02g069680	566.632	603.872	601.14	586.41	606.158	605.254	395.483	594.421	589.326	541.921	-1.08747	0.401773	0.777074	vacuolar protein sorting-associated protein 2 homolog 2 (AHRD V3.3 *** A0A2I4FA45_9ROSI)
Solyc02g069740	37.1468	28.5231	46.2967	28.5948	65.8311	122.422	40.1295	62.5592	34.4143	67.0674	1.94882	0.0256604	0.278903	Transcription factor jumonji (Jmj) family protein / zinc finger (C5HC2 type) family protein (AHRD V3.11 *** tr|A0A2U1QN90|A0A2U1QN90_ARTAN)
Solyc02g069750	15.126	13.6877	17.2709	12.7889	5.85178	19.4696	6.45816	19.7775	14.6235	10.9833	-1.33143	0.401627	0.777074	Choline/ethanolamine kinase (AHRD V3.3 *** A0A2I0WMF4_9ASPA)
Solyc02g069770	20.2847	16.8453	13.245	8.07102	9.30081	9.08868	48.1747	10.0083	13.8247	14.2086	1.02777	0.936888	0.982909	Transducin/WD40 repeat-like superfamily protein (AHRD V3.3 *** A0A2U1MQ79_ARTAN)
Solyc02g069780	147.642	157.585	94.1247	177.468	104.15	141.388	110.987	143.428	140.406	123.735	-1.13473	0.423451	0.788857	SIT4 phosphatase-associated family protein (AHRD V3.3 *** F4I6B2_ARATH)
Solyc02g069790	62.6303	66.1318	83.544	51.7222	72.0484	62.0419	85.3881	93.2415	65.0424	77.2377	1.1875	0.190038	0.602322	U2 snRNP auxiliary factor large subunit (AHRD V3.3 *-* A0A166WX29_9PEZI)
Solyc02g069810	71.0514	23.2927	7.70627	8.21171	8.27941	8.81409	79.8029	34.1812	17.9894	21.1225	1.17416	0.774238	0.937265	Nucleic acid binding protein (AHRD V3.3 *** A0A2K3PHJ0_TRIPR)
Solyc02g069820	73.337	83.1635	66.207	82.608	58.0385	97.863	61.4016	110.682	75.9968	78.8221	1.03718	0.804396	0.946232	kxDL motif protein (AHRD V3.3 *** AT3G29130.6)
Solyc02g069830	133.511	120.472	64.354	87.5506	70.6416	120.458	52.4077	114.186	97.5684	84.4744	-1.15501	0.477406	0.816805	Homeobox-leucine zipper protein HOX32 (AHRD V3.11 *** tr|A0A2G3D4B9|A0A2G3D4B9_CAPCH)
Solyc02g069860	22.3554	15.6189	12.2461	12.4499	18.4957	16.7173	9.08055	17.4365	15.1897	14.8748	-1.02117	0.939221	0.983531	Nuclear transcription factor Y subunit A-7 (AHRD V3.3 *** A0A2G3D4E1_CAPCH)
Solyc02g069880	45.2788	36.155	18.6345	12.9974	24.9987	28.7155	53.3775	31.6849	25.0934	33.1941	1.32282	0.292503	0.702087	E3 ubiquitin-protein ligase (AHRD V3.3 *** A0A1U8FSK4_CAPAN)
Solyc02g069920	38.6642	16.6977	24.1646	17.8642	23.403	19.3415	19.3663	11.1701	22.9764	17.6895	-1.29887	0.393388	0.772729	2-succinylbenzoate--CoA ligase, chloroplastic/peroxisomal (AHRD V3.3 *** A0A2G2XDL4_CAPBA)
Solyc02g069930	225.697	137.557	137.62	104.539	97.539	84.9439	233.759	127.852	145.376	125.443	-1.1589	0.496286	0.826459	Alpha/beta-Hydrolases superfamily protein (AHRD V3.3 *** Q9LFQ7_ARATH)
Solyc02g069940	6.86497	11.9349	28.356	8.10298	13.038	15.8383	21.4464	18.9214	11.7135	17.014	1.45251	0.184356	0.598566	WPP domain associated protein
Solyc02g069950	49.0609	49.2413	72.8409	17.9006	19.5751	30.7926	60.4161	44.1444	42.1286	35.6078	-1.18313	0.591596	0.873691	KR.1
Solyc02g069970	14.8984	10.4563	7.43151	6.24193	15.1516	8.10011	14.8441	21.9437	9.21995	14.1401	1.53365	0.133407	0.531146	Receptor-like protein kinase (AHRD V3.3 *** A0A2K3PS49_TRIPR)
Solyc02g069980	29.6865	48.7251	19.7099	45.1456	29.0447	43.6733	50.0366	46.3392	33.6824	41.4123	1.22949	0.306065	0.714596	Zinc finger protein (AHRD V3.11 *** tr|A0A200PLY4|A0A200PLY4_9MAGN)
Solyc02g070030	105.748	92.5427	172.128	146.955	122.427	71.5114	130.77	151.73	125.433	114.804	-1.09258	0.632951	0.885376	Small RNA 2'-O-methyltransferase-like (AHRD V3.3 *** A0A2S1CES1_PRUYE)
Solyc02g070050	38.1574	42.9349	67.3139	37.2537	49.0998	42.8309	47.3001	43.1253	45.0211	45.5101	1.01086	0.943594	0.984308	Fatty acid hydroxylase (AHRD V3.3 *** A0A200Q3T8_9MAGN)
Solyc02g070100	157.89	161.389	171.826	186.566	122.404	112.158	272.112	172.831	169.059	159.404	-1.06057	0.733652	0.920734	RNA helicase DEAD7
Solyc02g070220	9.55355	6.62468	16.3631	14.1353	9.39135	7.84508	10.0677	8.31897	10.9996	8.86302	-1.24106	0.33361	0.732642	Twinkle-like protein, chloroplastic/mitochondrial (AHRD V3.3 *-* A0A1J3IPL8_NOCCA)
Solyc02g070240	26.9345	30.814	33.8446	29.7733	37.5725	25.1614	20.7231	22.4721	30.2408	25.7588	-1.174	0.278193	0.69386	Zinc finger transcription factor 17
Solyc02g070260	130.014	87.6313	108.571	71.1827	114.117	143.717	166.234	95.7897	96.8689	127.123	1.31232	0.127336	0.523694	Outer arm dynein light chain.1
Solyc02g070290	36.2945	34.6502	55.7709	47.7944	49.4459	39.9225	29.3497	30.0458	42.7891	36.3232	-1.17801	0.351014	0.746191	Cation-chloride cotransporter.1
Solyc02g070330	64.7961	48.7928	62.2458	37.2226	35.4874	26.5573	75.9418	37.7027	52.0242	40.5301	-1.28359	0.271545	0.687048	40S ribosomal protein S4 (AHRD V3.3 *** A0A2G2WHB8_CAPBA)
Solyc02g070340	24.5059	17.9123	24.2139	23.6573	9.55523	10.4222	18.2637	18.4708	22.393	13.5384	-1.65403	0.0183948	0.243316	40S ribosomal protein S4 (AHRD V3.3 *** A0A2G2WHB8_CAPBA)
Solyc02g070360	104.267	123.895	101.668	56.342	42.9397	87.8961	144.592	56.8583	92.7479	74.6348	-1.24269	0.371747	0.758973	#N/A
Solyc02g070370	32.5356	20.8943	18.9683	22.772	26.2165	8.92283	16.4234	12.8704	23.2784	14.9119	-1.56106	0.0715804	0.418793	#N/A
Solyc02g070390	57.323	58.8068	56.3637	36.7316	45.7428	30.9917	27.2655	45.1611	51.3983	36.3485	-1.41404	0.0778501	0.43183	protein PLASTID TRANSCRIPTIONALLY ACTIVE 12 (AHRD V3.3 *** A0A2I4GUX2_9ROSI)
Solyc02g070400	72.4303	86.6559	108.142	86.1868	60.8352	75.7133	47.4699	86.617	87.4558	65.9686	-1.32572	0.132406	0.529861	Galactosyltransferase family protein (AHRD V3.3 *** A0A2U1PE75_ARTAN)
Solyc02g070460	51.3654	32.4543	48.4192	36.1206	59.3722	65.2901	43.3973	62.1159	41.3218	56.8557	1.37593	0.135576	0.534646	Cullin (AHRD V3.3 *** A0A200QC17_9MAGN)
Solyc02g070490	16.3608	20.5898	17.246	22.7379	17.3278	18.8174	21.1955	25.4088	19.0644	20.4707	1.07377	0.602114	0.876381	Alpha/beta-Hydrolases superfamily protein (AHRD V3.3 *** Q9FFW9_ARATH)
Solyc02g070500	306.056	295.303	291.758	252.843	153.464	203.075	286.545	202.92	285.75	206.322	-1.38497	0.0161115	0.230383	#N/A
Solyc02g070530	55.5096	46.1984	35.1288	21.4317	12.4569	28.3424	25.0864	20.9192	37.276	20.7471	-1.79668	0.0200184	0.25167	Potassium channel KAT1 (AHRD V3.11 *** tr|A0A2G3ANB5|A0A2G3ANB5_CAPAN)
Solyc02g070560	28.7584	37.6319	32.1477	20.4262	31.1297	23.966	35.2163	40.9344	29.0345	32.2033	1.10914	0.632391	0.885376	Phospho-N-acetylmuramoyl-pentapeptide-transferase-like protein (AHRD V3.3 *** A0A2G2XE40_CAPBA)
Solyc02g070570	74.9258	64.3606	82.7031	45.9507	54.6453	58.6476	94.2539	100.205	65.4284	74.1733	1.13366	0.471509	0.813724	40S ribosomal protein S14 (AHRD V3.3 *** A0A2G2YPH6_CAPAN)
Solyc02g070580	78.7163	93.6299	76.4764	80.6726	54.6749	56.1049	81.7189	64.8002	82.117	63.4851	-1.29348	0.0478633	0.354868	sterol 22-desaturase
Solyc02g070620	10.1678	11.561	11.889	13.8527	6.52801	8.19238	10.4578	7.80788	11.7958	8.12908	-1.45106	0.0191885	0.247584	F-box domain (AHRD V3.3 *** A0A200PSQ4_9MAGN)
Solyc02g070670	9.52372	11.1113	7.02803	7.73036	8.00923	7.4366	5.84583	11.3495	8.70765	7.92862	-1.09826	0.658159	0.897172	Urease accessory protein UreG-like (AHRD V3.3 *** A0A2K3MUD0_TRIPR)
Solyc02g070760	14.2261	22.0437	22.6638	11.6289	15.2567	24.5323	14.4448	25.251	16.9555	19.2219	1.13367	0.518025	0.835818	NAD(P)-binding Rossmann-fold superfamily protein (AHRD V3.3 *** A0A2U1NQA9_ARTAN)
Solyc02g070770	13.444	12.7518	9.16113	29.6027	9.90824	11.8886	33.2497	15.2847	14.684	15.642	1.06524	0.838537	0.955609	NAD(P)-binding Rossmann-fold superfamily protein (AHRD V3.3 *** A0A2U1NQA9_ARTAN)
Solyc02g070780	415.418	395.575	417.839	444.371	298.846	305.37	324.911	242.761	417.943	291.276	-1.43487	0.000204763	0.0349865	DNA helicase (AHRD V3.11 *** tr|A0A1U8FUX5|A0A1U8FUX5_CAPAN)
Solyc02g070790	101.219	121.042	126.563	95.0833	73.9308	127.498	78.7615	117.409	110.193	96.6242	-1.14042	0.352268	0.746839	3-oxoacyl-[acyl-carrier-protein] synthase (AHRD V3.3 *** A0A2I4EJY8_9ROSI)
Solyc02g070800	210.94	122.464	128.913	121.741	123.704	91.4737	80.2675	111.848	141.898	100.395	-1.41339	0.0667211	0.407387	DUF5.1
Solyc02g070810	100.616	100.443	79.0301	86.9573	63.4618	65.8567	92.8828	88.0132	91.2896	76.4538	-1.19405	0.153283	0.560003	Nuclear pore complex protein (AHRD V3.3 *** A0A2G3D4U4_CAPCH)
Solyc02g070830	44.7001	19.7157	27.9232	41.615	44.5758	19.7012	88.7897	44.3344	31.8115	43.1195	1.35547	0.365075	0.754541	F-box protein SKIP23-like (AHRD V3.3 *** A0A2I4GFL5_9ROSI)
Solyc02g070860	115.903	143.284	117.851	86.911	169.739	143.167	95.9085	123.484	114.203	130.249	1.14051	0.374623	0.759924	tobamovirus multiplication protein 1-like (AHRD V3.3 *** A0A2I4EJZ3_9ROSI)
Solyc02g070900	32.001	29.1127	34.1407	25.2723	37.2534	37.2299	27.325	33.8024	29.9427	33.6428	1.12357	0.342801	0.741025	Unknown protein
Solyc02g070920	9.43235	44.5528	22.1923	74.7984	77.7984	24.1374	54.7986	84.5484	28.9	54.3106	1.87926	0.148657	0.554918	Unknown protein
Solyc02g070960	25.3553	4.76755	12.8349	51.299	38.6489	41.5574	44.6361	39.7276	16.7964	41.081	2.44582	0.100683	0.473462	#N/A
Solyc02g070970	41.1123	17.7313	15.4208	40.1388	24.4683	25.7627	24.221	21.6634	25.9177	23.9816	-1.08073	0.819224	0.951188	Chlorophyll a-b binding protein, chloroplastic (AHRD V3.3 *** A0A2G3A7J8_CAPAN)
Solyc02g070990	278.973	304.801	303.695	340.558	294.596	285.268	175.991	212.42	306.233	236.751	-1.29348	0.0599372	0.388028	Chlorophyll a-b binding protein, chloroplastic (AHRD V3.3 *** A0A2G3A7J8_CAPAN)
Solyc02g071000	229.961	195.55	242.423	203.846	171.46	176.033	100.132	108.583	217.119	134.593	-1.61315	0.00385774	0.129091	Chlorophyll a-b binding protein, chloroplastic (AHRD V3.3 *** A0A2G3A7J8_CAPAN)
Solyc02g071040	98.2526	65.3953	54.6225	60.4292	49.0453	79.1618	62.4434	66.8691	67.8621	63.4536	-1.06948	0.708946	0.915205	Starch synthase, chloroplastic/amyloplastic (AHRD V3.3 *** A0A314LCS0_NICAT)
Solyc02g071060	158.816	96.1307	86.2855	106.109	78.6637	64.1707	177.322	66.3425	108.733	87.7843	-1.23864	0.325897	0.727512	Purine permease (AHRD V3.3 *** A0A2P5DL88_TREOI),Pfam:PF16913
Solyc02g071090	14.3219	7.13982	5.90996	5.07441	5.60664	4.52378	22.1356	13.4229	7.44157	9.3172	1.25205	0.532624	0.843971	Purine permease (AHRD V3.3 *** A0A2U1LZ22_ARTAN),Pfam:PF16913
Solyc02g071100	38.9279	21.332	17.1957	23.1719	10.1616	11.3904	37.0342	24.826	23.9838	18.0614	-1.3279	0.329912	0.729494	Purine permease (AHRD V3.3 *** A0A2U1LZ22_ARTAN),Pfam:PF16913
Solyc02g071170	88.2151	66.4836	78.7079	63.2151	54.8895	49.1644	78.9651	46.5504	73.4978	56.1209	-1.30963	0.20565	0.617608	Coatomer subunit zeta-2 (AHRD V3.3 *** A0A2G3A7H8_CAPAN)
Solyc02g071180	365.076	357.93	272.088	269.539	357.545	373.043	301.869	251.634	312.88	317.263	1.01401	0.900237	0.971509	DUF1296 domain-containing protein (AHRD V3.3 *** A0A1Q3CH94_CEPFO)
Solyc02g071210	130.946	95.8275	99.374	77.6318	62.8818	91.058	71.7984	121.265	99.1913	84.0278	-1.18046	0.337305	0.735316	Cold-regulated inner membrane protein 2, chloroplastic (AHRD V3.3 *** A0A2G3D4Q0_CAPCH)
Solyc02g071220	35.9884	28.5763	22.3605	20.1503	28.8079	16.924	52.5672	32.4304	26.0905	30.194	1.15728	0.508975	0.831435	type-A response regulator2
Solyc02g071230	37.399	24.9089	34.0432	27.573	39.6011	26.1785	41.6407	35.2803	30.5796	35.1298	1.1488	0.371289	0.758518	#N/A
Solyc02g071250	64.8345	83.4662	69.949	59.2264	92.4192	104.196	65.4562	110.559	68.8103	91.367	1.32781	0.042013	0.334354	CTD small phosphatase-like protein 2 (AHRD V3.3 *** A0A2I4EJV3_9ROSI)
Solyc02g071270	98.109	114.545	107.041	131.324	90.1564	70.2679	125.729	131.725	112.11	101.208	-1.10772	0.447964	0.801667	Protein MEI2-like 5 (AHRD V3.3 *** A0A2G3A7K3_CAPAN)
Solyc02g071290	6.00456	24.2128	21.1947	25.0696	29.3841	48.8263	11.8546	25.0235	16.6715	25.5418	1.53206	0.241772	0.660161	Unknown protein
Solyc02g071320	164.501	218.094	157.5	165.679	181.524	129.281	164.769	210.291	174.92	168.866	-1.03585	0.741851	0.925331	Unknown protein
Solyc02g071330	107.807	166.067	115.74	97.394	131.485	188.825	58.4877	106.646	119.189	111.554	-1.06844	0.795561	0.943578	SH3 domain-containing protein (AHRD V3.3 *** A0A2U1QNC4_ARTAN)
Solyc02g071350	10.6396	22.4612	42.3877	21.4116	97.7922	110.532	49.9891	41.6747	21.5805	68.8866	3.19207	0.00186125	0.0967251	ABC transporter B family member 9 (AHRD V3.3 *** A0A2G3A7K1_CAPAN)
Solyc02g071450	67.4711	101.906	59.5485	83.2952	64.7364	91.7984	39.678	66.2891	76.4192	62.8773	-1.21537	0.282663	0.697213	2-oxoglutarate (2OG) and Fe(II)-dependent oxygenase superfamily protein (AHRD V3.3 *** Q9SB33_ARATH)
Solyc02g071500	8.89639	11.6217	8.17508	26.9144	17.2006	18.0188	11.136	23.4101	12.2812	16.8597	1.37281	0.297571	0.70721	2-oxoglutarate (2OG) and Fe(II)-dependent oxygenase superfamily protein (AHRD V3.3 *** Q9SB33_ARATH)
Solyc02g071530	28.9504	27.9997	42.6309	21.0077	48.4681	48.0015	32.7801	43.2258	29.1896	42.6104	1.45978	0.0889414	0.452818	Exonuclease.1
Solyc02g071570	30.0073	20.7015	36.9337	40.0946	24.6548	28.4981	22.8488	38.7131	30.9695	28.0776	-1.103	0.611213	0.879526	Pentatricopeptide repeat-containing protein, chloroplastic (AHRD V3.3 *** A0A2G3A7D3_CAPAN)
Solyc02g071580	9.72286	9.32182	9.56904	6.88636	10.2129	7.18513	10.4022	9.15816	8.791	9.14386	1.04014	0.848701	0.95851	#N/A
Solyc02g071590	40.0797	57.7337	37.9339	34.6214	79.3737	60.8788	16.531	43.994	41.7524	43.2971	1.037	0.901077	0.9717	Trehalose-6-phosphate synthase (AHRD V3.3 *** D7KVC5_ARALL)
Solyc02g071600	40.1798	57.4771	53.4533	48.3088	22.2903	42.1976	55.394	39.002	49.4169	37.7562	-1.30884	0.133434	0.531146	adenine phosphoribosyltransferase (AHRD V3.3 *** AT5G45660.1)
Solyc02g071620	32.8356	17.4259	32.1532	36.6146	10.5796	21.1936	38.5996	21.3378	28.6487	20.7301	-1.38199	0.273427	0.689229	GDSL-motif lipase/hydrolase family protein 1
Solyc02g071640	20.2	12.4259	14.8387	13.6286	32.5341	20.4467	16.1146	7.95223	15.01	17.0871	1.13838	0.617415	0.881452	GDSL esterase/lipase (AHRD V3.11 *-* tr|A0A2G3A7C5|A0A2G3A7C5_CAPAN)
Solyc02g071730	79.7844	72.3131	103.265	58.1721	95.5586	95.3251	157.508	117.555	76.7275	113.961	1.48527	0.0912946	0.459143	#N/A
Solyc02g071780	12.6419	20.1592	8.37366	10.5832	17.9889	10.8776	25.9132	13.9501	12.259	16.3083	1.33031	0.228041	0.645487	MACPF domain-containing protein (AHRD V3.3 *** A0A1Q3CKD2_CEPFO)
Solyc02g071800	117.756	78.7805	153.661	148.496	103.49	110.518	140.716	140.833	120.62	122.7	1.01724	0.90339	0.971999	Protein kinase domain (AHRD V3.3 *** A0A200QIY1_9MAGN)
Solyc02g071830	11.3435	14.0521	8.02431	11.794	7.62345	12.4012	6.68029	9.51281	11.0825	8.804	-1.25881	0.187611	0.600399	#N/A
Solyc02g071860	126.111	146.494	63.7918	103.16	122.019	112.167	88.5234	128.638	105.005	111.733	1.06406	0.70235	0.911858	LRR.1
Solyc02g071900	25.1745	15.6375	28.2192	31.1761	25.5876	20.0936	38.1677	22.0562	24.259	25.6495	1.05732	0.787381	0.941501	Adipose-regulatory protein (Seipin) (AHRD V3.3 *** A0A2U1QJP7_ARTAN)
Solyc02g071920	34.908	48.8528	35.4732	74.4642	22.0093	37.3795	40.1484	47.6115	46.0697	35.4123	-1.30095	0.204739	0.617112	NOD26-like intrinsic protein 1.2
Solyc02g071930	62.601	63.265	46.5396	61.8818	46.4233	61.9209	45.3935	65.0342	58.1142	53.9731	-1.07673	0.544668	0.851292	#N/A
Solyc02g071940	19.9517	16.4039	12.0331	12.8464	10.5592	11.0726	12.0824	13.3737	14.9976	11.7239	-1.27923	0.115852	0.505207	BnaC03g59480D protein (AHRD V3.3 *-* A0A078H9Y5_BRANA)
Solyc02g071980	30.703	19.5751	51.6537	11.6936	29.745	20.3079	48.4738	61.4188	24.5462	36.6203	1.49189	0.260443	0.678296	RING/FYVE/PHD-type zinc finger family protein (AHRD V3.3 *** Q84WW7_ARATH)
Solyc02g072010	13.7859	12.2373	12.8096	14.9653	2.5465	12.8349	10.3475	7.59416	13.4102	7.1189	-1.88374	0.0471304	0.352626	Pentatricopeptide repeat-containing protein (AHRD V3.11 *** tr|A0A2G2XEC7|A0A2G2XEC7_CAPBA)
Solyc02g072080	89.8458	120.863	106.51	91.6942	137.596	139.147	92.3198	96.4643	101.48	114.271	1.12604	0.413644	0.782767	RING-type E3 ubiquitin transferase (AHRD V3.3 *** A1E0Y2_SOLTU)
Solyc02g072090	54.9787	29.3342	33.3653	30.9453	38.1654	19.1933	24.3003	47.6802	35.9223	30.3523	-1.18351	0.602461	0.876381	DNA polymerase III gamma-tau subunit (AHRD V3.3 *** E5GC26_CUCME)
Solyc02g072100	98.2091	204.182	164.53	122.362	246.081	262.204	43.6625	137.398	141.747	140.266	-1.01056	0.978318	0.993654	Ubiquitin domain-containing protein (AHRD V3.3 *** A0A2U1KFN7_ARTAN)
Solyc02g072150	98.2905	89.8803	71.8161	140.625	89.4729	144.98	66.5865	111.913	97.1885	99.1554	1.02024	0.916549	0.976654	Trehalose-6-phosphate synthase (AHRD V3.3 *** E5GC29_CUCME)
Solyc02g072190	13.2487	9.38366	9.57594	9.53583	9.66488	10.1567	10.7274	12.9521	10.3222	10.8068	1.04695	0.732248	0.920487	DNA-binding WRKY (AHRD V3.11 *-* tr|A0A200Q8Z7|A0A200Q8Z7_9MAGN)
Solyc02g072230	53.5922	32.859	41.2943	80.7698	43.6722	35.4226	39.0769	46.9441	49.2293	41.0437	-1.19944	0.381452	0.765975	Transducin/WD40 repeat-like superfamily protein (AHRD V3.3 *** A0A2U1NCE8_ARTAN)
Solyc02g072240	7.85492	17.3129	17.9133	4.72283	28.5237	11.3655	6.24241	11.8963	10.3567	12.4563	1.20273	0.634615	0.885376	Cellulose synthase (AHRD V3.3 *** K4B8J8_SOLLC)
Solyc02g072250	13.624	34.4128	21.2791	11.4023	129.319	107.382	5.86207	30.1204	18.3651	39.571	2.15468	0.211913	0.62596	Leucine-rich repeat family protein (AHRD V3.3 *** E5GC33_CUCME)
Solyc02g072260	30.045	29.0142	27.3425	33.8693	44.7122	38.4491	38.1292	45.2362	29.9748	41.4967	1.38439	0.0415862	0.332417	Rho termination factor (AHRD V3.11 *** tr|A0A200QXF1|A0A200QXF1_9MAGN)
Solyc02g072420	8.64033	18.7827	18.7608	8.51129	25.2215	25.9943	4.45668	15.165	12.6877	14.5086	1.14351	0.723942	0.918758	F-box protein (AHRD V3.3 *** A0A2K3LAF5_TRIPR)
Solyc02g072440	14.904	11.9627	13.7345	23.9748	7.3992	10.1423	4.4112	32.5895	15.5659	10.1915	-1.52734	0.312402	0.719604	Receptor-like protein kinase (AHRD V3.3 *** A0A2R6Q6W2_ACTCH)
Solyc02g072460	52.1459	75.2822	62.5004	51.6126	50.5625	62.6985	70.9596	62.711	59.6538	61.2858	1.02736	0.819521	0.951188	#N/A
Solyc02g072490	145.127	284.589	188.184	204.834	373.663	478.902	31.3318	159.119	199.751	172.826	-1.15579	0.798284	0.944283	O-fucosyltransferase (AHRD V3.3 *** A0A2P5EP10_TREOI)
Solyc02g072500	23.9658	21.3064	27.2024	18.7605	31.257	12.617	10.7272	8.04659	22.5938	13.5832	-1.66337	0.0514323	0.366391	Nucleobase-ascorbate transporter 7 (AHRD V3.3 *** A0A1U8FKB3_CAPAN)
Solyc02g072510	13.542	12.9146	10.7988	8.16545	15.3787	25.9188	13.1307	27.4493	11.1437	19.4688	1.74706	0.0148942	0.223354	transcriptional regulator family protein (AHRD V3.3 *-* AT1G29220.1)
Solyc02g072520	47.4754	56.0486	51.0374	26.1232	63.9651	64.1245	98.5041	40.4861	43.3997	63.5963	1.46536	0.0729422	0.421182	Concanavalin A-like lectin/glucanase, subgroup (AHRD V3.3 *** A0A2U1KZV6_ARTAN)
Solyc02g072540	9.63662	54.5513	29.2497	11.3426	21.0133	38.4108	14.6202	23.8446	20.4358	23.0315	1.12702	0.742843	0.925967	Non-specific serine/threonine protein kinase (AHRD V3.3 *** A0A2G2XE54_CAPBA)
Solyc02g073580	31.0058	38.9365	37.855	57.7279	52.2195	62.1244	84.1044	73.5788	40.302	66.9371	1.66089	0.00426223	0.133514	transcription factor TGA6-like (AHRD V3.3 *** A0A2I4DJ54_9ROSI)
Solyc02g074600	98.2869	128.584	72.1856	112.533	81.4455	237.531	68.0736	105.193	100.659	108.49	1.07779	0.761147	0.933837	#N/A
Solyc02g075610	49.6326	61.6529	44.3752	55.9652	119.798	60.9651	91.7885	69.7939	52.5043	82.7055	1.57522	0.00931547	0.183639	Golgin candidate 6 (AHRD V3.3 *-* A0A2G2XK18_CAPBA)
Solyc02g075620	33.1773	28.8056	44.2826	32.7685	30.6201	26.1096	42.9068	29.0036	34.3164	31.5825	-1.08656	0.699171	0.911343	Pectinesterase (AHRD V3.11 *** tr|A0A1U8FXV9|A0A1U8FXV9_CAPAN)
Solyc02g075630	23.9609	77	45.3341	68.771	54.997	74.1035	42.7506	44.0839	48.9729	52.6441	1.07496	0.758924	0.933212	UPF0183 protein (AHRD V3.3 *** A0A2G3D7Z6_CAPCH)
[truncated: 9,279 more rows]
